# Supplementary material for: Histaminergic System and Inflammation-Related Genes in Normal Large Intestine and Adenocarcinoma Tissues: Transcriptional Profiles and Relations
Source: MDPI journal article supplement (doi:10.3390/ijms24054913), 2023-03-03
Supplement: s1 [file s1]

**Table S1:** Histaminergic system entities list used in the work.

**Table S2:** Inflammation-related entities list used in the work.

**Table S3A–F:** Data of moderated *t*-test (CRC, (A,B)) and *ANOVA* (LCS–HCS, C and D, CSI–CSIV, E and F) for histaminergic system (A,C,E) and inflammation (B,D,F)

**Figure S1:** Box–whisker plots of histaminergic system (133 mRNAs; A,C,E) and inflammation (627 mRNAs; B,D,F).

**Figure S2:** Profile plots of histaminergic system (133 mRNAs; A,C,E) and inflammation (627 mRNAs; B,D,F).

**Figure S3:** Self-organizing maps of histaminergic system (133 mRNAs; A,C,E) and inflammation (627 mRNAs; B,D,F).
