# Supplementary material for: Histaminergic System and Inflammation-Related Genes in Normal Large Intestine and Adenocarcinoma Tissues: Transcriptional Profiles and Relations
Source: Int J Mol Sci. 2023 Mar 3;24(5):4913. doi: 10.3390/ijms24054913 (PMC10002554; doi:10.3390/ijms24054913)
Supplement: Supplementary file 1 [file ijms-24-04913-s001.zip]

Archive with 27 entries (27 files):
- Caption for tables and figures.pdf
- Figure S1. A.png
- Figure S1. B.png
- Figure S1. C.png
- Figure S1. D.tiff
- Figure S1. E.png
- Figure S1. F.png
- Figure S2. A.png
- Figure S2. B.png
- Figure S2. C.tiff
- Figure S2. D.tiff
- Figure S2. E.jpg
- Figure S2. F.png
- Figure S3. A.jpg
- Figure S3. B.jpg
- Figure S3. C.jpg
- Figure S3. D.jpg
- Figure S3. E.jpg
- Figure S3. F.jpg
- Table S1. Histaminergic system entities list.xlsx
- Table S2. Inflammation entities list.xlsx
- Table S3. A.xlsx
- Table S3. B.xlsx
- Table S3. C.xlsx
- Table S3. D.xlsx
- Table S3. E.xlsx
- Table S3. F.xlsx
