# Supplementary material for: Histaminergic System and Inflammation-Related Genes in Normal Large Intestine and Adenocarcinoma Tissues: Transcriptional Profiles and Relations
Source: Int J Mol Sci. 2023 Mar 3;24(5):4913. doi: 10.3390/ijms24054913 (PMC10002554; doi:10.3390/ijms24054913)
Supplement: Supplementary file 1 [file ijms-24-04913-s001.zip › Table S1. Histaminergic system entities list.xlsx]

## Sheet: Table S1. Histaminergic system 
Probe Set ID	Gene Symbol	Entrez Gene	Gene Ontology Biological Process	Gene Ontology Cellular Component	Gene Ontology Molecular Function	Alignments
207151_at	ADCYAP1R1	117	0007165 // signal transduction // inferred from electronic annotation///0007166 // cell surface receptor signaling pathway // traceable author statement///0007169 // transmembrane receptor protein tyrosine kinase signaling pathway // traceable author statement///0007186 // G-protein coupled receptor signaling pathway // inferred from electronic annotation///0007190 // activation of adenylate cycl…	0005737 // cytoplasm // inferred from electronic annotation///0005768 // endosome // inferred from electronic annotation///0005791 // rough endoplasmic reticulum // inferred from electronic annotation///0005886 // plasma membrane // traceable author statement///0005887 // integral component of plasma membrane // traceable author statement///0005901 // caveola // inferred from electronic annotatio…	0004871 // signal transducer activity // inferred from electronic annotation///0004872 // receptor activity // traceable author statement///0004888 // transmembrane signaling receptor activity // inferred from electronic annotation///0004930 // G-protein coupled receptor activity // inferred from electronic annotation///0004999 // vasoactive intestinal polypeptide receptor activity // inferred fr…	chr7:31102808-31146311 (+) // 89.66 // p14.3
210505_at	ADH7	131	0001523 // retinoid metabolic process // inferred from direct assay///0006068 // ethanol catabolic process // inferred from electronic annotation///0006069 // ethanol oxidation // inferred from direct assay///0006069 // ethanol oxidation // traceable author statement///0006805 // xenobiotic metabolic process // traceable author statement///0009617 // response to bacterium // inferred from direct …	0005576 // extracellular region // inferred from direct assay///0005622 // intracellular // inferred from electronic annotation///0005737 // cytoplasm // inferred from electronic annotation///0005829 // cytosol // traceable author statement	0004022 // alcohol dehydrogenase (NAD) activity // traceable author statement///0004024 // alcohol dehydrogenase activity, zinc-dependent // inferred from direct assay///0004031 // aldehyde oxidase activity // inferred from direct assay///0004745 // retinol dehydrogenase activity // inferred from direct assay///0008270 // zinc ion binding // inferred from electronic annotation///0016491 // oxidor…	chr4:100333700-100356474 (-) // 99.72 // q23
208950_s_at	ALDH7A1	501	0006081 // cellular aldehyde metabolic process // inferred from sequence or structural similarity///0006554 // lysine catabolic process // traceable author statement///0007605 // sensory perception of sound // traceable author statement///0008152 // metabolic process // inferred from electronic annotation///0019285 // glycine betaine biosynthetic process from choline // inferred from electronic a…	0005634 // nucleus // inferred from electronic annotation///0005737 // cytoplasm // inferred from direct assay///0005739 // mitochondrion // inferred from direct assay///0005759 // mitochondrial matrix // traceable author statement///0005829 // cytosol // inferred from electronic annotation///0070062 // extracellular exosome // inferred from direct assay	0004029 // aldehyde dehydrogenase (NAD) activity // not recorded///0004029 // aldehyde dehydrogenase (NAD) activity // inferred from sequence or structural similarity///0004043 // L-aminoadipate-semialdehyde dehydrogenase activity // not recorded///0005515 // protein binding // inferred from physical interaction///0008802 // betaine-aldehyde dehydrogenase activity // inferred from electronic anno…	chr5:76585806-76587735 (+) // 94.46 // q13.3///chr5:125880548-125930899 (-) // 97.14 // q23.2
208951_at	ALDH7A1	501	0006081 // cellular aldehyde metabolic process // inferred from sequence or structural similarity///0006554 // lysine catabolic process // traceable author statement///0007605 // sensory perception of sound // traceable author statement///0008152 // metabolic process // inferred from electronic annotation///0019285 // glycine betaine biosynthetic process from choline // inferred from electronic a…	0005634 // nucleus // inferred from electronic annotation///0005737 // cytoplasm // inferred from direct assay///0005739 // mitochondrion // inferred from direct assay///0005759 // mitochondrial matrix // traceable author statement///0005829 // cytosol // inferred from electronic annotation///0070062 // extracellular exosome // inferred from direct assay	0004029 // aldehyde dehydrogenase (NAD) activity // not recorded///0004029 // aldehyde dehydrogenase (NAD) activity // inferred from sequence or structural similarity///0004043 // L-aminoadipate-semialdehyde dehydrogenase activity // not recorded///0005515 // protein binding // inferred from physical interaction///0008802 // betaine-aldehyde dehydrogenase activity // inferred from electronic anno…	chr5:76585806-76587735 (+) // 94.46 // q13.3///chr5:125880548-125930899 (-) // 97.14 // q23.2
213591_at	ALDH7A1	501	0006081 // cellular aldehyde metabolic process // inferred from sequence or structural similarity///0006554 // lysine catabolic process // traceable author statement///0007605 // sensory perception of sound // traceable author statement///0008152 // metabolic process // inferred from electronic annotation///0019285 // glycine betaine biosynthetic process from choline // inferred from electronic a…	0005634 // nucleus // inferred from electronic annotation///0005737 // cytoplasm // inferred from direct assay///0005739 // mitochondrion // inferred from direct assay///0005759 // mitochondrial matrix // traceable author statement///0005829 // cytosol // inferred from electronic annotation///0070062 // extracellular exosome // inferred from direct assay	0004029 // aldehyde dehydrogenase (NAD) activity // not recorded///0004029 // aldehyde dehydrogenase (NAD) activity // inferred from sequence or structural similarity///0004043 // L-aminoadipate-semialdehyde dehydrogenase activity // not recorded///0005515 // protein binding // inferred from physical interaction///0008802 // betaine-aldehyde dehydrogenase activity // inferred from electronic anno…	chr5:125878761-125885987 (-) // 67.59 // q23.2
200602_at	APP	351	0001878 // response to yeast // inferred from mutant phenotype///0001967 // suckling behavior // inferred from electronic annotation///0002576 // platelet degranulation // traceable author statement///0006378 // mRNA polyadenylation // inferred from sequence or structural similarity///0006417 // regulation of translation // inferred from sequence or structural similarity///0006468 // protein phos…	0005576 // extracellular region // traceable author statement///0005615 // extracellular space // inferred from direct assay///0005641 // nuclear envelope lumen // inferred from direct assay///0005737 // cytoplasm // inferred from direct assay///0005737 // cytoplasm // inferred from sequence or structural similarity///0005768 // endosome // inferred from direct assay///0005790 // smooth endoplasm…	0003677 // DNA binding // inferred from sequence or structural similarity///0004867 // serine-type endopeptidase inhibitor activity // inferred from direct assay///0005102 // receptor binding // inferred from physical interaction///0005515 // protein binding // inferred from physical interaction///0008201 // heparin binding // inferred from electronic annotation///0008233 // peptidase activity //…	chr21:27252861-27543085 (-) // 95.14 // q21.3
211277_x_at	APP	351	0001878 // response to yeast // inferred from mutant phenotype///0002576 // platelet degranulation // traceable author statement///0006378 // mRNA polyadenylation // inferred from sequence or structural similarity///0006417 // regulation of translation // inferred from sequence or structural similarity///0006468 // protein phosphorylation // inferred from sequence or structural similarity///00065…	0005576 // extracellular region // traceable author statement///0005615 // extracellular space // inferred from direct assay///0005641 // nuclear envelope lumen // inferred from direct assay///0005737 // cytoplasm // inferred from direct assay///0005737 // cytoplasm // inferred from sequence or structural similarity///0005768 // endosome // inferred from direct assay///0005794 // Golgi apparatus …	0003677 // DNA binding // inferred from sequence or structural similarity///0004867 // serine-type endopeptidase inhibitor activity // inferred from direct assay///0005102 // receptor binding // inferred from physical interaction///0005515 // protein binding // inferred from physical interaction///0008201 // heparin binding // inferred from electronic annotation///0008233 // peptidase activity //…	chr21:26968486-27543064 (-) // 65.5 // q21.3
214953_s_at	APP	351	0001878 // response to yeast // inferred from mutant phenotype///0001967 // suckling behavior // inferred from electronic annotation///0002576 // platelet degranulation // traceable author statement///0006378 // mRNA polyadenylation // inferred from sequence or structural similarity///0006417 // regulation of translation // inferred from sequence or structural similarity///0006468 // protein phos…	0005576 // extracellular region // traceable author statement///0005615 // extracellular space // inferred from direct assay///0005641 // nuclear envelope lumen // inferred from direct assay///0005737 // cytoplasm // inferred from direct assay///0005737 // cytoplasm // inferred from sequence or structural similarity///0005768 // endosome // inferred from direct assay///0005790 // smooth endoplasm…	0003677 // DNA binding // inferred from sequence or structural similarity///0004867 // serine-type endopeptidase inhibitor activity // inferred from direct assay///0005102 // receptor binding // inferred from physical interaction///0005515 // protein binding // inferred from physical interaction///0008201 // heparin binding // inferred from electronic annotation///0008233 // peptidase activity //…	chr21:27253212-27543056 (-) // 94.86 // q21.3
210381_s_at	CCKBR	887	0001696 // gastric acid secretion // inferred from electronic annotation///0007165 // signal transduction // inferred from electronic annotation///0007166 // cell surface receptor signaling pathway // non-traceable author statement///0007186 // G-protein coupled receptor signaling pathway // inferred from electronic annotation///0007200 // phospholipase C-activating G-protein coupled receptor sig…	0005829 // cytosol // inferred from direct assay///0005886 // plasma membrane // traceable author statement///0005887 // integral component of plasma membrane // inferred by curator///0016020 // membrane // inferred from electronic annotation///0016021 // integral component of membrane // inferred from electronic annotation	0004435 // phosphatidylinositol phospholipase C activity // traceable author statement///0004871 // signal transducer activity // inferred from electronic annotation///0004930 // G-protein coupled receptor activity // inferred from electronic annotation///0004951 // cholecystokinin receptor activity // traceable author statement///0005515 // protein binding // inferred from physical interaction//…	chr11:6281101-6293355 (+) // 98.26 // p15.4
206207_at	CLC	1178	0002667 // regulation of T cell anergy // inferred from mutant phenotype///0002724 // regulation of T cell cytokine production // inferred from mutant phenotype///0007275 // multicellular organismal development // traceable author statement///0046006 // regulation of activated T cell proliferation // inferred from mutant phenotype///0070231 // T cell apoptotic process // inferred from direct assay	0005737 // cytoplasm // inferred from electronic annotation///0005829 // cytosol // inferred from direct assay	0004622 // lysophospholipase activity // inferred from direct assay///0005515 // protein binding // inferred from physical interaction///0030246 // carbohydrate binding // inferred from electronic annotation///0097153 // cysteine-type endopeptidase activity involved in apoptotic process // inferred from direct assay	chr19:40221895-40228625 (-) // 97.66 // q13.2
206164_at	CLCA2	9635	0006508 // proteolysis // inferred from electronic annotation///0006810 // transport // traceable author statement///0006811 // ion transport // inferred from electronic annotation///0006821 // chloride transport // inferred from electronic annotation///0007155 // cell adhesion // inferred from electronic annotation///0034220 // ion transmembrane transport // traceable author statement///0055085 …	0005576 // extracellular region // inferred from electronic annotation///0005634 // nucleus // inferred from direct assay///0005886 // plasma membrane // traceable author statement///0005887 // integral component of plasma membrane // traceable author statement///0009925 // basal plasma membrane // inferred from electronic annotation///0016020 // membrane // inferred from electronic annotation///…	0005229 // intracellular calcium activated chloride channel activity // not recorded///0005254 // chloride channel activity // traceable author statement///0008233 // peptidase activity // inferred from electronic annotation///0008237 // metallopeptidase activity // inferred from electronic annotation///0015276 // ligand-gated ion channel activity // inferred from electronic annotation///0016787 …	chr1:86889824-86921931 (+) // 98.83 // p22.3
206165_s_at	CLCA2	9635	0006508 // proteolysis // inferred from electronic annotation///0006810 // transport // traceable author statement///0006811 // ion transport // inferred from electronic annotation///0006821 // chloride transport // inferred from electronic annotation///0007155 // cell adhesion // inferred from electronic annotation///0034220 // ion transmembrane transport // traceable author statement///0055085 …	0005576 // extracellular region // inferred from electronic annotation///0005634 // nucleus // inferred from direct assay///0005886 // plasma membrane // traceable author statement///0005887 // integral component of plasma membrane // traceable author statement///0009925 // basal plasma membrane // inferred from electronic annotation///0016020 // membrane // inferred from electronic annotation///…	0005229 // intracellular calcium activated chloride channel activity // not recorded///0005254 // chloride channel activity // traceable author statement///0008233 // peptidase activity // inferred from electronic annotation///0008237 // metallopeptidase activity // inferred from electronic annotation///0015276 // ligand-gated ion channel activity // inferred from electronic annotation///0016787 …	chr1:86889824-86921931 (+) // 98.83 // p22.3
206166_s_at	CLCA2	9635	0006508 // proteolysis // inferred from electronic annotation///0006810 // transport // traceable author statement///0006811 // ion transport // inferred from electronic annotation///0006821 // chloride transport // inferred from electronic annotation///0007155 // cell adhesion // inferred from electronic annotation///0034220 // ion transmembrane transport // traceable author statement///0055085 …	0005576 // extracellular region // inferred from electronic annotation///0005634 // nucleus // inferred from direct assay///0005886 // plasma membrane // traceable author statement///0005887 // integral component of plasma membrane // traceable author statement///0009925 // basal plasma membrane // inferred from electronic annotation///0016020 // membrane // inferred from electronic annotation///…	0005229 // intracellular calcium activated chloride channel activity // not recorded///0005254 // chloride channel activity // traceable author statement///0008233 // peptidase activity // inferred from electronic annotation///0008237 // metallopeptidase activity // inferred from electronic annotation///0015276 // ligand-gated ion channel activity // inferred from electronic annotation///0016787 …	chr1:86889824-86921236 (+) // 99.06 // p22.3
217528_at	CLCA2	9635	0006508 // proteolysis // inferred from electronic annotation///0006810 // transport // traceable author statement///0006811 // ion transport // inferred from electronic annotation///0006821 // chloride transport // inferred from electronic annotation///0007155 // cell adhesion // inferred from electronic annotation///0034220 // ion transmembrane transport // traceable author statement///0055085 …	0005576 // extracellular region // inferred from electronic annotation///0005634 // nucleus // inferred from direct assay///0005886 // plasma membrane // traceable author statement///0005887 // integral component of plasma membrane // traceable author statement///0009925 // basal plasma membrane // inferred from electronic annotation///0016020 // membrane // inferred from electronic annotation///…	0005229 // intracellular calcium activated chloride channel activity // not recorded///0005254 // chloride channel activity // traceable author statement///0008233 // peptidase activity // inferred from electronic annotation///0008237 // metallopeptidase activity // inferred from electronic annotation///0015276 // ligand-gated ion channel activity // inferred from electronic annotation///0016787 …	chr1:86921507-86922234 (+) // 96.01 // p22.3
205624_at	CPA3	1359	0002002 // regulation of angiotensin levels in blood // inferred from electronic annotation///0002003 // angiotensin maturation // traceable author statement///0002230 // positive regulation of defense response to virus by host // inferred from mutant phenotype///0006508 // proteolysis // traceable author statement///0044267 // cellular protein metabolic process // traceable author statement///00…	0005576 // extracellular region // traceable author statement///0005615 // extracellular space // not recorded///0030133 // transport vesicle // inferred from electronic annotation///0030141 // secretory granule // non-traceable author statement///0031410 // cytoplasmic vesicle // inferred from electronic annotation	0004180 // carboxypeptidase activity // inferred from electronic annotation///0004181 // metallocarboxypeptidase activity // non-traceable author statement///0004181 // metallocarboxypeptidase activity // traceable author statement///0008233 // peptidase activity // inferred from electronic annotation///0008237 // metallopeptidase activity // inferred from electronic annotation///0008270 // zinc …	chr3:148583083-148614862 (+) // 99.88 // q24
206878_at	DAO	1610	0006551 // leucine metabolic process // inferred from electronic annotation///0006562 // proline catabolic process // inferred from direct assay///0034641 // cellular nitrogen compound metabolic process // traceable author statement///0036088 // D-serine catabolic process // inferred from direct assay///0042416 // dopamine biosynthetic process // inferred from direct assay///0044281 // small mole…	0005741 // mitochondrial outer membrane // inferred from direct assay///0005777 // peroxisome // inferred from direct assay///0005778 // peroxisomal membrane // inferred from direct assay///0005782 // peroxisomal matrix // traceable author statement///0005829 // cytosol // inferred from direct assay	0003884 // D-amino-acid oxidase activity // inferred from direct assay///0003884 // D-amino-acid oxidase activity // traceable author statement///0005102 // receptor binding // inferred from physical interaction///0005515 // protein binding // inferred from physical interaction///0016491 // oxidoreductase activity // inferred from electronic annotation///0016641 // oxidoreductase activity, acting…	chr12:109273884-109294696 (+) // 92.16 // q24.11
209839_at	DNM3	26052	0006897 // endocytosis // inferred from sequence or structural similarity///0007416 // synapse assembly // inferred from sequence or structural similarity///0008152 // metabolic process // inferred from electronic annotation///0046847 // filopodium assembly // inferred from sequence or structural similarity///0051491 // positive regulation of filopodium assembly // inferred from electronic annota…	0001917 // photoreceptor inner segment // inferred from electronic annotation///0005737 // cytoplasm // inferred from electronic annotation///0005739 // mitochondrion // inferred from electronic annotation///0005794 // Golgi apparatus // inferred from electronic annotation///0005856 // cytoskeleton // inferred from electronic annotation///0005874 // microtubule // inferred from electronic annotat…	0000166 // nucleotide binding // inferred from electronic annotation///0003924 // GTPase activity // inferred from sequence or structural similarity///0005515 // protein binding // inferred from physical interaction///0005525 // GTP binding // inferred from electronic annotation///0016787 // hydrolase activity // inferred from electronic annotation///0031798 // type 1 metabotropic glutamate recep…	chr1:171810639-172381855 (+) // 98.26 // q24.3
207977_s_at	DPT	1805	0007155 // cell adhesion // inferred from electronic annotation///0008285 // negative regulation of cell proliferation // inferred from electronic annotation///0030199 // collagen fibril organization // inferred from electronic annotation	0005576 // extracellular region // inferred from electronic annotation///0005578 // proteinaceous extracellular matrix // inferred from electronic annotation///0005615 // extracellular space // inferred from direct assay///0031012 // extracellular matrix // inferred from direct assay///0031012 // extracellular matrix // inferred from sequence or structural similarity///0070062 // extracellular ex…		chr1:168665747-168698418 (-) // 90.24 // q24.2
213068_at	DPT	1805	0007155 // cell adhesion // inferred from electronic annotation///0008285 // negative regulation of cell proliferation // inferred from electronic annotation///0030199 // collagen fibril organization // inferred from electronic annotation	0005576 // extracellular region // inferred from electronic annotation///0005578 // proteinaceous extracellular matrix // inferred from electronic annotation///0005615 // extracellular space // inferred from direct assay///0031012 // extracellular matrix // inferred from direct assay///0031012 // extracellular matrix // inferred from sequence or structural similarity///0070062 // extracellular ex…		chr1:168664705-168698421 (-) // 96.86 // q24.2
213071_at	DPT	1805	0007155 // cell adhesion // inferred from electronic annotation///0008285 // negative regulation of cell proliferation // inferred from electronic annotation///0030199 // collagen fibril organization // inferred from electronic annotation	0005576 // extracellular region // inferred from electronic annotation///0005578 // proteinaceous extracellular matrix // inferred from electronic annotation///0005615 // extracellular space // inferred from direct assay///0031012 // extracellular matrix // inferred from direct assay///0031012 // extracellular matrix // inferred from sequence or structural similarity///0070062 // extracellular ex…		chr1:168664705-168698421 (-) // 96.86 // q24.2
206590_x_at	DRD2	1813	0001659 // temperature homeostasis // inferred from sequence or structural similarity///0001666 // response to hypoxia // inferred from electronic annotation///0001963 // synaptic transmission, dopaminergic // not recorded///0001964 // startle response // inferred from electronic annotation///0001975 // response to amphetamine // inferred from sequence or structural similarity///0001976 // neurol…	0001669 // acrosomal vesicle // inferred from electronic annotation///0005622 // intracellular // inferred from direct assay///0005829 // cytosol // not recorded///0005829 // cytosol // inferred from direct assay///0005829 // cytosol // inferred from electronic annotation///0005886 // plasma membrane // traceable author statement///0005887 // integral component of plasma membrane // inferred by c…	0001591 // dopamine neurotransmitter receptor activity, coupled via Gi/Go // inferred from direct assay///0004871 // signal transducer activity // inferred from electronic annotation///0004930 // G-protein coupled receptor activity // inferred from electronic annotation///0004935 // adrenergic receptor activity // not recorded///0004952 // dopamine neurotransmitter receptor activity // inferred f…	chr11:113280331-113295406 (-) // 99.76 // q23.2
211624_s_at	DRD2	1813	0001659 // temperature homeostasis // inferred from sequence or structural similarity///0001666 // response to hypoxia // inferred from electronic annotation///0001963 // synaptic transmission, dopaminergic // not recorded///0001964 // startle response // inferred from electronic annotation///0001975 // response to amphetamine // inferred from sequence or structural similarity///0001976 // neurol…	0001669 // acrosomal vesicle // inferred from electronic annotation///0005622 // intracellular // inferred from direct assay///0005829 // cytosol // not recorded///0005829 // cytosol // inferred from direct assay///0005829 // cytosol // inferred from electronic annotation///0005886 // plasma membrane // traceable author statement///0005887 // integral component of plasma membrane // inferred by c…	0001591 // dopamine neurotransmitter receptor activity, coupled via Gi/Go // inferred from direct assay///0004871 // signal transducer activity // inferred from electronic annotation///0004930 // G-protein coupled receptor activity // inferred from electronic annotation///0004935 // adrenergic receptor activity // not recorded///0004952 // dopamine neurotransmitter receptor activity // inferred f…	chr11:113281360-113346111 (-) // 93.79 // q23.2
216924_s_at	DRD2	1813	0001659 // temperature homeostasis // inferred from sequence or structural similarity///0001666 // response to hypoxia // inferred from electronic annotation///0001963 // synaptic transmission, dopaminergic // not recorded///0001964 // startle response // inferred from electronic annotation///0001975 // response to amphetamine // inferred from sequence or structural similarity///0001976 // neurol…	0001669 // acrosomal vesicle // inferred from electronic annotation///0005622 // intracellular // inferred from direct assay///0005829 // cytosol // not recorded///0005829 // cytosol // inferred from direct assay///0005829 // cytosol // inferred from electronic annotation///0005886 // plasma membrane // traceable author statement///0005887 // integral component of plasma membrane // inferred by c…	0001591 // dopamine neurotransmitter receptor activity, coupled via Gi/Go // inferred from direct assay///0004871 // signal transducer activity // inferred from electronic annotation///0004930 // G-protein coupled receptor activity // inferred from electronic annotation///0004935 // adrenergic receptor activity // not recorded///0004952 // dopamine neurotransmitter receptor activity // inferred f…	chr11:113280634-113295687 (-) // 93.05 // q23.2
216938_x_at	DRD2	1813	0001659 // temperature homeostasis // inferred from sequence or structural similarity///0001666 // response to hypoxia // inferred from electronic annotation///0001963 // synaptic transmission, dopaminergic // not recorded///0001964 // startle response // inferred from electronic annotation///0001975 // response to amphetamine // inferred from sequence or structural similarity///0001976 // neurol…	0001669 // acrosomal vesicle // inferred from electronic annotation///0005622 // intracellular // inferred from direct assay///0005829 // cytosol // not recorded///0005829 // cytosol // inferred from direct assay///0005829 // cytosol // inferred from electronic annotation///0005886 // plasma membrane // traceable author statement///0005887 // integral component of plasma membrane // inferred by c…	0001591 // dopamine neurotransmitter receptor activity, coupled via Gi/Go // inferred from direct assay///0004871 // signal transducer activity // inferred from electronic annotation///0004930 // G-protein coupled receptor activity // inferred from electronic annotation///0004935 // adrenergic receptor activity // not recorded///0004952 // dopamine neurotransmitter receptor activity // inferred f…	chr11:113280336-113345863 (-) // 98.1 // q23.2
211625_s_at	DRD3	1814	0000122 // negative regulation of transcription from RNA polymerase II promoter // inferred from electronic annotation///0001963 // synaptic transmission, dopaminergic // inferred from electronic annotation///0001975 // response to amphetamine // inferred from electronic annotation///0002016 // regulation of blood volume by renin-angiotensin // inferred from electronic annotation///0002031 // G-p…	0005886 // plasma membrane // inferred from direct assay///0005886 // plasma membrane // traceable author statement///0005887 // integral component of plasma membrane // inferred by curator///0005887 // integral component of plasma membrane // inferred from direct assay///0016020 // membrane // inferred from electronic annotation///0016021 // integral component of membrane // inferred from electr…	0001591 // dopamine neurotransmitter receptor activity, coupled via Gi/Go // inferred from direct assay///0001591 // dopamine neurotransmitter receptor activity, coupled via Gi/Go // inferred from sequence or structural similarity///0004871 // signal transducer activity // inferred from electronic annotation///0004930 // G-protein coupled receptor activity // inferred from electronic annotation//…	chr3:113847556-113890839 (-) // 99.82 // q13.31
214559_at	DRD3	1814	0000122 // negative regulation of transcription from RNA polymerase II promoter // inferred from electronic annotation///0001963 // synaptic transmission, dopaminergic // inferred from electronic annotation///0001975 // response to amphetamine // inferred from electronic annotation///0002016 // regulation of blood volume by renin-angiotensin // inferred from electronic annotation///0002031 // G-p…	0005886 // plasma membrane // inferred from direct assay///0005886 // plasma membrane // traceable author statement///0005887 // integral component of plasma membrane // inferred by curator///0005887 // integral component of plasma membrane // inferred from direct assay///0016020 // membrane // inferred from electronic annotation///0016021 // integral component of membrane // inferred from electr…	0001591 // dopamine neurotransmitter receptor activity, coupled via Gi/Go // inferred from direct assay///0001591 // dopamine neurotransmitter receptor activity, coupled via Gi/Go // inferred from sequence or structural similarity///0004871 // signal transducer activity // inferred from electronic annotation///0004930 // G-protein coupled receptor activity // inferred from electronic annotation//…	chr3:113847471-113890874 (-) // 99.7 // q13.31
208215_x_at	DRD4	1815	0000187 // activation of MAPK activity // inferred from direct assay///0001662 // behavioral fear response // non-traceable author statement///0001963 // synaptic transmission, dopaminergic // inferred from electronic annotation///0001975 // response to amphetamine // inferred from sequence or structural similarity///0006874 // cellular calcium ion homeostasis // inferred by curator///0007165 // …	0005737 // cytoplasm // inferred from electronic annotation///0005886 // plasma membrane // inferred from direct assay///0005886 // plasma membrane // traceable author statement///0005887 // integral component of plasma membrane // inferred from direct assay///0005938 // cell cortex // inferred from electronic annotation///0012506 // vesicle membrane // inferred from electronic annotation///00160…	0001591 // dopamine neurotransmitter receptor activity, coupled via Gi/Go // inferred from direct assay///0001591 // dopamine neurotransmitter receptor activity, coupled via Gi/Go // inferred from sequence or structural similarity///0004871 // signal transducer activity // inferred from electronic annotation///0004930 // G-protein coupled receptor activity // inferred from electronic annotation//…	chr11:637304-640703 (+) // 85.44 // p15.5
204232_at	FCER1G	2207	0001798 // positive regulation of type IIa hypersensitivity // inferred from electronic annotation///0001805 // positive regulation of type III hypersensitivity // inferred from electronic annotation///0001812 // positive regulation of type I hypersensitivity // inferred from electronic annotation///0002223 // stimulatory C-type lectin receptor signaling pathway // traceable author statement///00…	0005886 // plasma membrane // traceable author statement///0005887 // integral component of plasma membrane // inferred from electronic annotation///0009897 // external side of plasma membrane // not recorded///0009986 // cell surface // inferred from direct assay///0016020 // membrane // inferred from electronic annotation///0016021 // integral component of membrane // inferred from electronic a…	0004888 // transmembrane signaling receptor activity // inferred from electronic annotation///0005515 // protein binding // inferred from physical interaction///0019767 // IgE receptor activity // not recorded///0019863 // IgE binding // not recorded///0019864 // IgG binding // not recorded	chr1:161185086-161189038 (+) // 100.0 // q23.3
205776_at	FMO5	2330	0017144 // drug metabolic process // not recorded///0055114 // oxidation-reduction process // not recorded	0005737 // cytoplasm // inferred from direct assay///0005783 // endoplasmic reticulum // inferred from direct assay///0005789 // endoplasmic reticulum membrane // inferred from electronic annotation///0016020 // membrane // inferred from electronic annotation///0016021 // integral component of membrane // inferred from electronic annotation///0031090 // organelle membrane // inferred from electro…	0004497 // monooxygenase activity // inferred from electronic annotation///0004499 // N,N-dimethylaniline monooxygenase activity // not recorded///0016491 // oxidoreductase activity // inferred from electronic annotation///0050660 // flavin adenine dinucleotide binding // inferred from electronic annotation///0050661 // NADP binding // inferred from electronic annotation	chr1:146657837-146696922 (-) // 95.74 // q21.1
215300_s_at	FMO5	2330	0017144 // drug metabolic process // not recorded///0055114 // oxidation-reduction process // not recorded	0005737 // cytoplasm // inferred from direct assay///0005783 // endoplasmic reticulum // inferred from direct assay///0005789 // endoplasmic reticulum membrane // inferred from electronic annotation///0016020 // membrane // inferred from electronic annotation///0016021 // integral component of membrane // inferred from electronic annotation///0031090 // organelle membrane // inferred from electro…	0004497 // monooxygenase activity // inferred from electronic annotation///0004499 // N,N-dimethylaniline monooxygenase activity // not recorded///0016491 // oxidoreductase activity // inferred from electronic annotation///0050660 // flavin adenine dinucleotide binding // inferred from electronic annotation///0050661 // NADP binding // inferred from electronic annotation	chr1:146679987-146697220 (-) // 82.7 // q21.1
207010_at	GABRB1	2560	0006810 // transport // traceable author statement///0006811 // ion transport // inferred from sequence or structural similarity///0006821 // chloride transport // inferred from electronic annotation///0007165 // signal transduction // traceable author statement///0007268 // synaptic transmission // not recorded///0007268 // synaptic transmission // traceable author statement///0009636 // respons…	0005634 // nucleus // inferred from electronic annotation///0005635 // nuclear envelope // inferred from electronic annotation///0005737 // cytoplasm // inferred from electronic annotation///0005886 // plasma membrane // traceable author statement///0005887 // integral component of plasma membrane // inferred from sequence or structural similarity///0016020 // membrane // inferred from electronic…	0004890 // GABA-A receptor activity // inferred from sequence or structural similarity///0005216 // ion channel activity // inferred from electronic annotation///0005230 // extracellular ligand-gated ion channel activity // not recorded///0005253 // anion channel activity // inferred from electronic annotation///0005254 // chloride channel activity // not recorded///0015276 // ligand-gated ion ch…	chr4:47033578-47428445 (+) // 99.84 // p12
210565_at	GCGR	2642	0006091 // generation of precursor metabolites and energy // traceable author statement///0006112 // energy reserve metabolic process // traceable author statement///0006887 // exocytosis // inferred from electronic annotation///0007165 // signal transduction // inferred from electronic annotation///0007166 // cell surface receptor signaling pathway // inferred from electronic annotation///000718…	0005768 // endosome // inferred from electronic annotation///0005886 // plasma membrane // traceable author statement///0005887 // integral component of plasma membrane // inferred from direct assay///0016020 // membrane // inferred from electronic annotation///0016021 // integral component of membrane // traceable author statement	0004871 // signal transducer activity // inferred from electronic annotation///0004888 // transmembrane signaling receptor activity // inferred from electronic annotation///0004930 // G-protein coupled receptor activity // inferred from electronic annotation///0004967 // glucagon receptor activity // inferred from direct assay///0005085 // guanyl-nucleotide exchange factor activity // traceable a…	chr17:79766838-79771642 (+) // 97.72 // q25.3
205349_at	GNA15	2769	0007165 // signal transduction // inferred from electronic annotation///0007186 // G-protein coupled receptor signaling pathway // inferred from electronic annotation///0007188 // adenylate cyclase-modulating G-protein coupled receptor signaling pathway // not recorded///0007200 // phospholipase C-activating G-protein coupled receptor signaling pathway // inferred from electronic annotation///000…	0005829 // cytosol // inferred from genetic interaction///0005834 // heterotrimeric G-protein complex // non-traceable author statement///0005886 // plasma membrane // traceable author statement	0000166 // nucleotide binding // inferred from electronic annotation///0001664 // G-protein coupled receptor binding // not recorded///0003924 // GTPase activity // not recorded///0004871 // signal transducer activity // inferred from genetic interaction///0005525 // GTP binding // inferred from electronic annotation///0019001 // guanyl nucleotide binding // inferred from electronic annotation///…	chr19:3136229-3163741 (+) // 99.9 // p13.3
209576_at	GNAI1	2770	0007049 // cell cycle // inferred from electronic annotation///0007165 // signal transduction // inferred from electronic annotation///0007186 // G-protein coupled receptor signaling pathway // inferred from sequence or structural similarity///0007188 // adenylate cyclase-modulating G-protein coupled receptor signaling pathway // not recorded///0007193 // adenylate cyclase-inhibiting G-protein co…	0005622 // intracellular // inferred from electronic annotation///0005634 // nucleus // inferred from electronic annotation///0005737 // cytoplasm // inferred from direct assay///0005765 // lysosomal membrane // inferred from direct assay///0005813 // centrosome // inferred from direct assay///0005815 // microtubule organizing center // inferred from electronic annotation///0005834 // heterotrime…	0000166 // nucleotide binding // inferred from electronic annotation///0003924 // GTPase activity // not recorded///0003924 // GTPase activity // traceable author statement///0004871 // signal transducer activity // not recorded///0005515 // protein binding // inferred from physical interaction///0005525 // GTP binding // inferred from sequence or structural similarity///0019001 // guanyl nucleot…	chr7:79764161-79847350 (+) // 98.92 // q21.11
204762_s_at	GNAO1	2775	0006936 // muscle contraction // traceable author statement///0007165 // signal transduction // inferred from electronic annotation///0007186 // G-protein coupled receptor signaling pathway // inferred from electronic annotation///0007188 // adenylate cyclase-modulating G-protein coupled receptor signaling pathway // not recorded///0007212 // dopamine receptor signaling pathway // not recorded///…	0005622 // intracellular // inferred from electronic annotation///0005834 // heterotrimeric G-protein complex // not recorded///0005886 // plasma membrane // traceable author statement///0016020 // membrane // inferred from electronic annotation///0030425 // dendrite // inferred from electronic annotation///0043005 // neuron projection // inferred from electronic annotation///0043209 // myelin sh…	0000166 // nucleotide binding // inferred from electronic annotation///0003924 // GTPase activity // not recorded///0004871 // signal transducer activity // not recorded///0005525 // GTP binding // inferred from electronic annotation///0019001 // guanyl nucleotide binding // inferred from electronic annotation///0031683 // G-protein beta/gamma-subunit complex binding // not recorded///0031821 // …	chr16:56225428-56391355 (+) // 93.78 // q12.2
204763_s_at	GNAO1	2775	0006936 // muscle contraction // traceable author statement///0007165 // signal transduction // inferred from electronic annotation///0007186 // G-protein coupled receptor signaling pathway // inferred from electronic annotation///0007188 // adenylate cyclase-modulating G-protein coupled receptor signaling pathway // not recorded///0007212 // dopamine receptor signaling pathway // not recorded///…	0005622 // intracellular // inferred from electronic annotation///0005834 // heterotrimeric G-protein complex // not recorded///0005886 // plasma membrane // traceable author statement///0016020 // membrane // inferred from electronic annotation///0030425 // dendrite // inferred from electronic annotation///0043005 // neuron projection // inferred from electronic annotation///0043209 // myelin sh…	0000166 // nucleotide binding // inferred from electronic annotation///0003924 // GTPase activity // not recorded///0004871 // signal transducer activity // not recorded///0005525 // GTP binding // inferred from electronic annotation///0019001 // guanyl nucleotide binding // inferred from electronic annotation///0031683 // G-protein beta/gamma-subunit complex binding // not recorded///0031821 // …	chr16:56226147-56391150 (+) // 97.34 // q12.2
215912_at	GNAO1	2775	0006936 // muscle contraction // traceable author statement///0007165 // signal transduction // inferred from electronic annotation///0007186 // G-protein coupled receptor signaling pathway // inferred from electronic annotation///0007188 // adenylate cyclase-modulating G-protein coupled receptor signaling pathway // not recorded///0007212 // dopamine receptor signaling pathway // not recorded///…	0005622 // intracellular // inferred from electronic annotation///0005834 // heterotrimeric G-protein complex // not recorded///0005886 // plasma membrane // traceable author statement///0016020 // membrane // inferred from electronic annotation///0030425 // dendrite // inferred from electronic annotation///0043005 // neuron projection // inferred from electronic annotation///0043209 // myelin sh…	0000166 // nucleotide binding // inferred from electronic annotation///0003924 // GTPase activity // not recorded///0004871 // signal transducer activity // not recorded///0005515 // protein binding // inferred from electronic annotation///0005525 // GTP binding // inferred from electronic annotation///0019001 // guanyl nucleotide binding // inferred from electronic annotation///0031683 // G-prot…	chr16:56374756-56378096 (+) // 98.77 // q12.2
207067_s_at	HDC	3067	0001694 // histamine biosynthetic process // inferred from direct assay///0001694 // histamine biosynthetic process // inferred from electronic annotation///0006520 // cellular amino acid metabolic process // inferred from electronic annotation///0006547 // histidine metabolic process // traceable author statement///0006548 // histidine catabolic process // inferred from direct assay///0006548 //…	0005829 // cytosol // traceable author statement	0003824 // catalytic activity // inferred from electronic annotation///0004398 // histidine decarboxylase activity // inferred from direct assay///0004398 // histidine decarboxylase activity // traceable author statement///0005515 // protein binding // inferred from physical interaction///0016829 // lyase activity // inferred from electronic annotation///0016831 // carboxy-lyase activity // infer…	chr15:50534150-50557922 (-) // 92.95 // q21.2
204110_at	HNMT	3176	0002347 // response to tumor cell // inferred from electronic annotation///0006548 // histidine catabolic process // traceable author statement///0006972 // hyperosmotic response // inferred from electronic annotation///0007420 // brain development // not recorded///0007585 // respiratory gaseous exchange // traceable author statement///0014075 // response to amine // inferred from electronic ann…	0005654 // nucleoplasm // inferred from direct assay///0005737 // cytoplasm // inferred from direct assay///0005829 // cytosol // traceable author statement///0043005 // neuron projection // not recorded///0070062 // extracellular exosome // inferred from direct assay	0008168 // methyltransferase activity // inferred from electronic annotation///0008170 // N-methyltransferase activity // inferred from electronic annotation///0016740 // transferase activity // inferred from electronic annotation///0046539 // histamine N-methyltransferase activity // not recorded	chr2:138721807-138772970 (-) // 83.79 // q22.1
204111_at	HNMT	3176	0002347 // response to tumor cell // inferred from electronic annotation///0006548 // histidine catabolic process // traceable author statement///0006972 // hyperosmotic response // inferred from electronic annotation///0007420 // brain development // not recorded///0007585 // respiratory gaseous exchange // traceable author statement///0014075 // response to amine // inferred from electronic ann…	0005654 // nucleoplasm // inferred from direct assay///0005737 // cytoplasm // inferred from direct assay///0005829 // cytosol // traceable author statement///0043005 // neuron projection // not recorded///0070062 // extracellular exosome // inferred from direct assay	0008168 // methyltransferase activity // inferred from electronic annotation///0008170 // N-methyltransferase activity // inferred from electronic annotation///0016740 // transferase activity // inferred from electronic annotation///0046539 // histamine N-methyltransferase activity // not recorded	chr2:138721807-138772970 (+) // 83.79 // q22.1
204112_s_at	HNMT	3176	0002347 // response to tumor cell // inferred from electronic annotation///0006548 // histidine catabolic process // traceable author statement///0006972 // hyperosmotic response // inferred from electronic annotation///0007420 // brain development // not recorded///0007585 // respiratory gaseous exchange // traceable author statement///0014075 // response to amine // inferred from electronic ann…	0005654 // nucleoplasm // inferred from direct assay///0005737 // cytoplasm // inferred from direct assay///0005829 // cytosol // traceable author statement///0043005 // neuron projection // not recorded///0070062 // extracellular exosome // inferred from direct assay	0008168 // methyltransferase activity // inferred from electronic annotation///0008170 // N-methyltransferase activity // inferred from electronic annotation///0016740 // transferase activity // inferred from electronic annotation///0046539 // histamine N-methyltransferase activity // not recorded	chr2:138721807-138772236 (+) // 92.56 // q22.1
211732_x_at	HNMT	3176	0002347 // response to tumor cell // inferred from electronic annotation///0006548 // histidine catabolic process // traceable author statement///0006972 // hyperosmotic response // inferred from electronic annotation///0007420 // brain development // not recorded///0007585 // respiratory gaseous exchange // traceable author statement///0014075 // response to amine // inferred from electronic ann…	0005654 // nucleoplasm // inferred from direct assay///0005737 // cytoplasm // inferred from direct assay///0005829 // cytosol // traceable author statement///0043005 // neuron projection // not recorded///0070062 // extracellular exosome // inferred from direct assay	0008168 // methyltransferase activity // inferred from electronic annotation///0008170 // N-methyltransferase activity // inferred from electronic annotation///0016740 // transferase activity // inferred from electronic annotation///0046539 // histamine N-methyltransferase activity // not recorded
205454_at	HPCA	3208	0007420 // brain development // inferred from electronic annotation///0010518 // positive regulation of phospholipase activity // inferred from electronic annotation///0014070 // response to organic cyclic compound // inferred from electronic annotation///0019722 // calcium-mediated signaling // inferred from electronic annotation///0031283 // negative regulation of guanylate cyclase activity // …	0030424 // axon // inferred from electronic annotation///0032590 // dendrite membrane // inferred from electronic annotation///0032809 // neuronal cell body membrane // inferred from electronic annotation///0032839 // dendrite cytoplasm // inferred from electronic annotation///0043204 // perikaryon // inferred from electronic annotation///0044327 // dendritic spine head // inferred from electroni…	0003779 // actin binding // inferred from direct assay///0005509 // calcium ion binding // non-traceable author statement///0005515 // protein binding // inferred from electronic annotation///0019900 // kinase binding // inferred from electronic annotation///0046872 // metal ion binding // inferred from electronic annotation	chr1:33354477-33360246 (+) // 96.32 // p35.1
205579_at	HRH1	3269	0006954 // inflammatory response // traceable author statement///0007165 // signal transduction // inferred from electronic annotation///0007186 // G-protein coupled receptor signaling pathway // inferred from sequence or structural similarity///0007200 // phospholipase C-activating G-protein coupled receptor signaling pathway // traceable author statement///0007606 // sensory perception of chemi…	0005654 // nucleoplasm // inferred from direct assay///0005737 // cytoplasm // inferred from direct assay///0005886 // plasma membrane // inferred from direct assay///0005886 // plasma membrane // traceable author statement///0005887 // integral component of plasma membrane // inferred from sequence or structural similarity///0016020 // membrane // inferred from electronic annotation///0016021 //…	0004871 // signal transducer activity // inferred from electronic annotation///0004930 // G-protein coupled receptor activity // traceable author statement///0004969 // histamine receptor activity // inferred from sequence or structural similarity///0051381 // histamine binding // not recorded	chr3:11300686-11304415 (+) // 74.01 // p25.3
205580_s_at	HRH1	3269	0006954 // inflammatory response // traceable author statement///0007165 // signal transduction // inferred from electronic annotation///0007186 // G-protein coupled receptor signaling pathway // inferred from sequence or structural similarity///0007200 // phospholipase C-activating G-protein coupled receptor signaling pathway // traceable author statement///0007606 // sensory perception of chemi…	0005654 // nucleoplasm // inferred from direct assay///0005737 // cytoplasm // inferred from direct assay///0005886 // plasma membrane // inferred from direct assay///0005886 // plasma membrane // traceable author statement///0005887 // integral component of plasma membrane // inferred from sequence or structural similarity///0016020 // membrane // inferred from electronic annotation///0016021 //…	0004871 // signal transducer activity // inferred from electronic annotation///0004930 // G-protein coupled receptor activity // traceable author statement///0004969 // histamine receptor activity // inferred from sequence or structural similarity///0051381 // histamine binding // not recorded	chr3:11300720-11302374 (+) // 100.0 // p25.3
220805_at	HRH2	3274	0001696 // gastric acid secretion // inferred from electronic annotation///0001697 // histamine-induced gastric acid secretion // not recorded///0001698 // gastrin-induced gastric acid secretion // inferred from electronic annotation///0001963 // synaptic transmission, dopaminergic // not recorded///0003382 // epithelial cell morphogenesis // inferred from electronic annotation///0006955 // immun…	0005886 // plasma membrane // traceable author statement///0005887 // integral component of plasma membrane // traceable author statement///0016020 // membrane // inferred from electronic annotation///0016021 // integral component of membrane // inferred from electronic annotation	0001588 // dopamine neurotransmitter receptor activity, coupled via Gs // not recorded///0004871 // signal transducer activity // inferred from electronic annotation///0004930 // G-protein coupled receptor activity // inferred from electronic annotation///0004969 // histamine receptor activity // inferred from electronic annotation///0035240 // dopamine binding // not recorded	chr5:175109711-175111558 (+) // 89.17 // q35.2
220447_at	HRH3	11255	0001505 // regulation of neurotransmitter levels // inferred from electronic annotation///0007165 // signal transduction // inferred from electronic annotation///0007186 // G-protein coupled receptor signaling pathway // inferred from electronic annotation///0007187 // G-protein coupled receptor signaling pathway, coupled to cyclic nucleotide second messenger // traceable author statement///00071…	0005829 // cytosol // inferred from electronic annotation///0005886 // plasma membrane // traceable author statement///0005887 // integral component of plasma membrane // traceable author statement///0016020 // membrane // inferred from electronic annotation///0016021 // integral component of membrane // inferred from electronic annotation///0043005 // neuron projection // inferred from electroni…	0004871 // signal transducer activity // inferred from electronic annotation///0004930 // G-protein coupled receptor activity // inferred from electronic annotation///0004969 // histamine receptor activity // inferred from electronic annotation///0008144 // drug binding // inferred from electronic annotation///0051381 // histamine binding // not recorded	chr20:60790026-60795312 (-) // 93.52 // q13.33
221663_x_at	HRH3	11255	0001505 // regulation of neurotransmitter levels // inferred from electronic annotation///0007165 // signal transduction // inferred from electronic annotation///0007186 // G-protein coupled receptor signaling pathway // inferred from electronic annotation///0007187 // G-protein coupled receptor signaling pathway, coupled to cyclic nucleotide second messenger // traceable author statement///00071…	0005829 // cytosol // inferred from electronic annotation///0005886 // plasma membrane // traceable author statement///0005887 // integral component of plasma membrane // traceable author statement///0016020 // membrane // inferred from electronic annotation///0016021 // integral component of membrane // inferred from electronic annotation///0043005 // neuron projection // inferred from electroni…	0004871 // signal transducer activity // inferred from electronic annotation///0004930 // G-protein coupled receptor activity // inferred from electronic annotation///0004969 // histamine receptor activity // inferred from electronic annotation///0008144 // drug binding // inferred from electronic annotation///0051381 // histamine binding // not recorded	chr20:60790016-60795054 (-) // 85.9 // q13.33
221169_s_at	HRH4	59340	0006954 // inflammatory response // not recorded///0007165 // signal transduction // inferred from electronic annotation///0007186 // G-protein coupled receptor signaling pathway // inferred from electronic annotation///0007194 // negative regulation of adenylate cyclase activity // not recorded///0007204 // positive regulation of cytosolic calcium ion concentration // inferred from electronic an…	0005829 // cytosol // inferred from electronic annotation///0005886 // plasma membrane // traceable author statement///0005887 // integral component of plasma membrane // not recorded///0016020 // membrane // inferred from electronic annotation///0016021 // integral component of membrane // inferred from electronic annotation	0004871 // signal transducer activity // inferred from electronic annotation///0004930 // G-protein coupled receptor activity // inferred from electronic annotation///0004969 // histamine receptor activity // not recorded///0004969 // histamine receptor activity // non-traceable author statement///0051381 // histamine binding // not recorded	chr18:22040638-22057564 (+) // 99.76 // q11.2
221170_at	HRH4	59340	0006954 // inflammatory response // not recorded///0007165 // signal transduction // inferred from electronic annotation///0007186 // G-protein coupled receptor signaling pathway // inferred from electronic annotation///0007194 // negative regulation of adenylate cyclase activity // not recorded///0007204 // positive regulation of cytosolic calcium ion concentration // inferred from electronic an…	0005829 // cytosol // inferred from electronic annotation///0005886 // plasma membrane // traceable author statement///0005887 // integral component of plasma membrane // not recorded///0016020 // membrane // inferred from electronic annotation///0016021 // integral component of membrane // inferred from electronic annotation	0004871 // signal transducer activity // inferred from electronic annotation///0004930 // G-protein coupled receptor activity // inferred from electronic annotation///0004969 // histamine receptor activity // not recorded///0004969 // histamine receptor activity // non-traceable author statement///0051381 // histamine binding // not recorded	chr18:22040592-22059920 (+) // 59.61 // q11.2
206639_x_at	HTN1	3346	0031214 // biomineral tissue development // inferred from electronic annotation///0031640 // killing of cells of other organism // inferred from electronic annotation///0042742 // defense response to bacterium // non-traceable author statement///0050832 // defense response to fungus // inferred from electronic annotation	0005576 // extracellular region // non-traceable author statement	0005515 // protein binding // inferred from physical interaction///0046848 // hydroxyapatite binding // inferred from electronic annotation	chr4:70918784-70924561 (+) // 99.58 // q13.3
206786_at	HTN3	3347	0031214 // biomineral tissue development // inferred from electronic annotation///0031640 // killing of cells of other organism // inferred from electronic annotation///0042742 // defense response to bacterium // non-traceable author statement///0050832 // defense response to fungus // inferred from electronic annotation	0005576 // extracellular region // non-traceable author statement	0005515 // protein binding // inferred from physical interaction///0046872 // metal ion binding // inferred from electronic annotation	chr4:70894175-70902247 (+) // 99.81 // q13.3
206944_at	HTR6	3362	0007165 // signal transduction // inferred from electronic annotation///0007186 // G-protein coupled receptor signaling pathway // inferred from electronic annotation///0007187 // G-protein coupled receptor signaling pathway, coupled to cyclic nucleotide second messenger // traceable author statement///0007210 // serotonin receptor signaling pathway // inferred from electronic annotation///000726…	0005886 // plasma membrane // traceable author statement///0005887 // integral component of plasma membrane // traceable author statement///0005929 // cilium // inferred from electronic annotation///0016020 // membrane // inferred from electronic annotation///0016021 // integral component of membrane // inferred from electronic annotation	0004871 // signal transducer activity // inferred from electronic annotation///0004930 // G-protein coupled receptor activity // inferred from electronic annotation///0004969 // histamine receptor activity // traceable author statement///0004993 // serotonin receptor activity // inferred from electronic annotation///0005515 // protein binding // inferred from physical interaction	chr1:19991779-20007458 (+) // 85.56 // p36.13
218637_at	IMPACT	55364	0000122 // negative regulation of transcription from RNA polymerase II promoter // inferred from sequence or structural similarity///0001933 // negative regulation of protein phosphorylation // inferred from sequence or structural similarity///0006417 // regulation of translation // inferred from electronic annotation///0006446 // regulation of translational initiation // inferred from electronic…	0005737 // cytoplasm // inferred from electronic annotation///0005844 // polysome // inferred from sequence or structural similarity	0005515 // protein binding // inferred from electronic annotation	chr18:22006681-22033492 (+) // 83.79 // q11.2
203331_s_at	INPP5D	3635	0002376 // immune system process // inferred from electronic annotation///0006470 // protein dephosphorylation // inferred from electronic annotation///0006644 // phospholipid metabolic process // traceable author statement///0006661 // phosphatidylinositol biosynthetic process // traceable author statement///0006796 // phosphate-containing compound metabolic process // traceable author statement…	0005737 // cytoplasm // inferred from electronic annotation///0005829 // cytosol // traceable author statement///0016020 // membrane // inferred from electronic annotation	0004445 // inositol-polyphosphate 5-phosphatase activity // inferred from electronic annotation///0005515 // protein binding // inferred from physical interaction///0016787 // hydrolase activity // inferred from electronic annotation///0017124 // SH3 domain binding // inferred from electronic annotation///0034594 // phosphatidylinositol trisphosphate phosphatase activity // inferred from electron…	chr2:233925066-234115616 (+) // 97.57 // q37.1
203332_s_at	INPP5D	3635	0002376 // immune system process // inferred from electronic annotation///0006470 // protein dephosphorylation // inferred from electronic annotation///0006644 // phospholipid metabolic process // traceable author statement///0006661 // phosphatidylinositol biosynthetic process // traceable author statement///0006796 // phosphate-containing compound metabolic process // traceable author statement…	0005737 // cytoplasm // inferred from electronic annotation///0005829 // cytosol // traceable author statement///0016020 // membrane // inferred from electronic annotation	0004445 // inositol-polyphosphate 5-phosphatase activity // inferred from electronic annotation///0005515 // protein binding // inferred from physical interaction///0016787 // hydrolase activity // inferred from electronic annotation///0017124 // SH3 domain binding // inferred from electronic annotation///0034594 // phosphatidylinositol trisphosphate phosphatase activity // inferred from electron…	chr2:233925070-234116549 (+) // 95.94 // q37.1
203723_at	ITPKB	3707	0000165 // MAPK cascade // inferred from electronic annotation///0007165 // signal transduction // traceable author statement///0007166 // cell surface receptor signaling pathway // inferred from electronic annotation///0016310 // phosphorylation // inferred from electronic annotation///0030217 // T cell differentiation // inferred from electronic annotation///0043647 // inositol phosphate metabo…	0005622 // intracellular // inferred from electronic annotation///0005829 // cytosol // traceable author statement	0000166 // nucleotide binding // inferred from electronic annotation///0005515 // protein binding // inferred from physical interaction///0005516 // calmodulin binding // inferred from electronic annotation///0005524 // ATP binding // inferred from electronic annotation///0008440 // inositol-1,4,5-trisphosphate 3-kinase activity // inferred from electronic annotation///0016301 // kinase activity …	chr1:226819392-226923831 (-) // 92.43 // q42.12
221095_s_at	KCNE2	9992	0006810 // transport // inferred from electronic annotation///0006811 // ion transport // inferred from electronic annotation///0006813 // potassium ion transport // inferred from electronic annotation///0007568 // aging // inferred from electronic annotation///0010107 // potassium ion import // inferred from mutant phenotype///0034613 // cellular protein localization // inferred from electronic …	0005764 // lysosome // inferred from direct assay///0005886 // plasma membrane // inferred from direct assay///0008076 // voltage-gated potassium channel complex // inferred from direct assay///0009986 // cell surface // inferred from direct assay///0016020 // membrane // inferred from electronic annotation///0016021 // integral component of membrane // inferred from electronic annotation	0005242 // inward rectifier potassium channel activity // inferred from direct assay///0005244 // voltage-gated ion channel activity // inferred from electronic annotation///0005249 // voltage-gated potassium channel activity // inferred from electronic annotation///0005251 // delayed rectifier potassium channel activity // inferred from direct assay///0005267 // potassium channel activity // inf…	chr21:35742704-35743436 (+) // 99.86 // q22.11
205262_at	KCNH2	3757	0000160 // phosphorelay signal transduction system // inferred from electronic annotation///0003064 // regulation of heart rate by hormone // traceable author statement///0006810 // transport // inferred from electronic annotation///0006811 // ion transport // inferred from electronic annotation///0006813 // potassium ion transport // inferred from electronic annotation///0007165 // signal transd…	0005622 // intracellular // inferred from electronic annotation///0005635 // nuclear envelope // inferred from electronic annotation///0005737 // cytoplasm // inferred from electronic annotation///0005886 // plasma membrane // inferred from direct assay///0005886 // plasma membrane // inferred from mutant phenotype///0005886 // plasma membrane // traceable author statement///0005887 // integral c…	0000155 // phosphorelay sensor kinase activity // inferred from electronic annotation///0004871 // signal transducer activity // inferred from electronic annotation///0005216 // ion channel activity // inferred from electronic annotation///0005242 // inward rectifier potassium channel activity // inferred from direct assay///0005244 // voltage-gated ion channel activity // inferred from electroni…	chr7:150642049-150675178 (-) // 93.71 // q36.1
210036_s_at	KCNH2	3757	0000160 // phosphorelay signal transduction system // inferred from electronic annotation///0003064 // regulation of heart rate by hormone // traceable author statement///0006810 // transport // inferred from electronic annotation///0006811 // ion transport // inferred from electronic annotation///0006813 // potassium ion transport // inferred from electronic annotation///0007268 // synaptic tran…	0005622 // intracellular // inferred from electronic annotation///0005635 // nuclear envelope // inferred from electronic annotation///0005737 // cytoplasm // inferred from electronic annotation///0005886 // plasma membrane // inferred from direct assay///0005886 // plasma membrane // inferred from mutant phenotype///0005886 // plasma membrane // traceable author statement///0008076 // voltage-ga…	0000155 // phosphorelay sensor kinase activity // inferred from electronic annotation///0005216 // ion channel activity // inferred from electronic annotation///0005242 // inward rectifier potassium channel activity // inferred from direct assay///0005244 // voltage-gated ion channel activity // inferred from electronic annotation///0005249 // voltage-gated potassium channel activity // inferred …	chr7:150646521-150675178 (-) // 88.73 // q36.1
206573_at	KCNQ3	3786	0006810 // transport // inferred from electronic annotation///0006811 // ion transport // inferred from electronic annotation///0006813 // potassium ion transport // traceable author statement///0007268 // synaptic transmission // traceable author statement///0007411 // axon guidance // traceable author statement///0014003 // oligodendrocyte development // inferred from electronic annotation///00…	0005886 // plasma membrane // inferred from sequence or structural similarity///0005886 // plasma membrane // traceable author statement///0008076 // voltage-gated potassium channel complex // inferred from electronic annotation///0009986 // cell surface // inferred from electronic annotation///0016020 // membrane // inferred from electronic annotation///0016021 // integral component of membrane …	0005216 // ion channel activity // inferred from electronic annotation///0005244 // voltage-gated ion channel activity // inferred from electronic annotation///0005249 // voltage-gated potassium channel activity // traceable author statement///0005251 // delayed rectifier potassium channel activity // not recorded///0005267 // potassium channel activity // traceable author statement///0005516 // …	chr8:133141426-133493004 (-) // 98.02 // q24.22
200618_at	LASP1	3927	0006810 // transport // inferred from electronic annotation///0006811 // ion transport // inferred from sequence or structural similarity///0009967 // positive regulation of signal transduction // traceable author statement///0034220 // ion transmembrane transport // inferred from electronic annotation	0005737 // cytoplasm // inferred from electronic annotation///0005856 // cytoskeleton // inferred from electronic annotation///0005925 // focal adhesion // inferred from direct assay///0005938 // cell cortex // inferred from electronic annotation///0030864 // cortical actin cytoskeleton // inferred from sequence or structural similarity///0070062 // extracellular exosome // inferred from direct a…	0003779 // actin binding // inferred from electronic annotation///0005070 // SH3/SH2 adaptor activity // traceable author statement///0005515 // protein binding // inferred from physical interaction///0008270 // zinc ion binding // inferred from electronic annotation///0015075 // ion transmembrane transporter activity // inferred from sequence or structural similarity///0046872 // metal ion bindi…	chr17:37026367-37078015 (+) // 98.44 // q12
207857_at	LILRA2	11027	0002250 // adaptive immune response // inferred from electronic annotation///0002376 // immune system process // inferred from electronic annotation///0006952 // defense response // traceable author statement///0007165 // signal transduction // traceable author statement	0005576 // extracellular region // inferred from electronic annotation///0016020 // membrane // inferred from electronic annotation///0016021 // integral component of membrane // inferred from electronic annotation	0003823 // antigen binding // traceable author statement///0004872 // receptor activity // traceable author statement///0005515 // protein binding // inferred from electronic annotation	chr19:55085258-55099021 (+) // 99.88 // q13.42
211100_x_at	LILRA2	11027	0002250 // adaptive immune response // inferred from electronic annotation///0002376 // immune system process // inferred from electronic annotation///0006952 // defense response // traceable author statement///0007165 // signal transduction // traceable author statement	0005576 // extracellular region // inferred from electronic annotation///0016020 // membrane // inferred from electronic annotation///0016021 // integral component of membrane // inferred from electronic annotation	0003823 // antigen binding // traceable author statement///0004872 // receptor activity // traceable author statement///0005515 // protein binding // inferred from electronic annotation	chr19:55085345-55098862 (+) // 99.87 // q13.42
211101_x_at	LILRA2	11027	0002250 // adaptive immune response // inferred from electronic annotation///0002376 // immune system process // inferred from electronic annotation///0006952 // defense response // traceable author statement///0007165 // signal transduction // traceable author statement	0005576 // extracellular region // inferred from electronic annotation///0016020 // membrane // inferred from electronic annotation///0016021 // integral component of membrane // inferred from electronic annotation	0003823 // antigen binding // traceable author statement///0004872 // receptor activity // traceable author statement///0005515 // protein binding // inferred from electronic annotation	chr19:55085307-55098862 (+) // 99.86 // q13.42
211102_s_at	LILRA2	11027	0002250 // adaptive immune response // inferred from electronic annotation///0002376 // immune system process // inferred from electronic annotation///0006952 // defense response // traceable author statement///0007165 // signal transduction // traceable author statement	0005576 // extracellular region // inferred from electronic annotation///0016020 // membrane // inferred from electronic annotation///0016021 // integral component of membrane // inferred from electronic annotation	0003823 // antigen binding // traceable author statement///0004872 // receptor activity // traceable author statement///0005515 // protein binding // inferred from electronic annotation	chr19:55085345-55098862 (+) // 99.85 // q13.42
210225_x_at	LILRA6///LILRB2///LILRB3///LOC102725015///LOC102725029///LOC102725031///LOC102725034///LOC102725035	10288///11025///79168///102725015///102725029///102725031///102725034///102725035	0002250 // adaptive immune response // inferred from electronic annotation///0002376 // immune system process // inferred from electronic annotation///0002578 // negative regulation of antigen processing and presentation // inferred from direct assay///0002645 // positive regulation of tolerance induction // inferred from mutant phenotype///0002666 // positive regulation of T cell tolerance induc…	0005615 // extracellular space // inferred from direct assay///0005737 // cytoplasm // inferred from direct assay///0005886 // plasma membrane // traceable author statement///0005887 // integral component of plasma membrane // inferred by curator///0005887 // integral component of plasma membrane // traceable author statement///0009986 // cell surface // inferred from direct assay///0016020 // me…	0004872 // receptor activity // traceable author statement///0004888 // transmembrane signaling receptor activity // traceable author statement///0005515 // protein binding // inferred from physical interaction///0008157 // protein phosphatase 1 binding // inferred from physical interaction///0023029 // MHC class Ib protein binding // inferred from physical interaction///0032396 // inhibitory MHC…	chr19:54720796-54746602 (-) // 97.92 // q13.42
210784_x_at	LILRA6///LILRB2///LILRB3///LOC102725015///LOC102725029///LOC102725031///LOC102725034///LOC102725035	10288///11025///79168///102725015///102725029///102725031///102725034///102725035	0002250 // adaptive immune response // inferred from electronic annotation///0002376 // immune system process // inferred from electronic annotation///0002578 // negative regulation of antigen processing and presentation // inferred from direct assay///0002645 // positive regulation of tolerance induction // inferred from mutant phenotype///0002666 // positive regulation of T cell tolerance induc…	0005615 // extracellular space // inferred from direct assay///0005737 // cytoplasm // inferred from direct assay///0005886 // plasma membrane // traceable author statement///0005887 // integral component of plasma membrane // inferred by curator///0005887 // integral component of plasma membrane // traceable author statement///0009986 // cell surface // inferred from direct assay///0016020 // me…	0004872 // receptor activity // traceable author statement///0004888 // transmembrane signaling receptor activity // traceable author statement///0005515 // protein binding // inferred from physical interaction///0008157 // protein phosphatase 1 binding // inferred from physical interaction///0023029 // MHC class Ib protein binding // inferred from physical interaction///0032396 // inhibitory MHC…	chr19:54720796-54746602 (-) // 97.7 // q13.42
211133_x_at	LILRA6///LILRB2///LILRB3///LOC102725015///LOC102725029///LOC102725031///LOC102725034///LOC102725035	10288///11025///79168///102725015///102725029///102725031///102725034///102725035	0002250 // adaptive immune response // inferred from electronic annotation///0002376 // immune system process // inferred from electronic annotation///0002578 // negative regulation of antigen processing and presentation // inferred from direct assay///0002645 // positive regulation of tolerance induction // inferred from mutant phenotype///0002666 // positive regulation of T cell tolerance induc…	0005615 // extracellular space // inferred from direct assay///0005737 // cytoplasm // inferred from direct assay///0005886 // plasma membrane // traceable author statement///0005887 // integral component of plasma membrane // inferred by curator///0005887 // integral component of plasma membrane // traceable author statement///0009986 // cell surface // inferred from direct assay///0016020 // me…	0004872 // receptor activity // traceable author statement///0004888 // transmembrane signaling receptor activity // traceable author statement///0005515 // protein binding // inferred from physical interaction///0008157 // protein phosphatase 1 binding // inferred from physical interaction///0023029 // MHC class Ib protein binding // inferred from physical interaction///0032396 // inhibitory MHC…	chr19:54720796-54746602 (-) // 97.51 // q13.42
211135_x_at	LILRA6///LILRB2///LILRB3///LOC102725015///LOC102725029///LOC102725031///LOC102725034///LOC102725035	10288///11025///79168///102725015///102725029///102725031///102725034///102725035	0002250 // adaptive immune response // inferred from electronic annotation///0002376 // immune system process // inferred from electronic annotation///0002578 // negative regulation of antigen processing and presentation // inferred from direct assay///0002645 // positive regulation of tolerance induction // inferred from mutant phenotype///0002666 // positive regulation of T cell tolerance induc…	0005615 // extracellular space // inferred from direct assay///0005737 // cytoplasm // inferred from direct assay///0005886 // plasma membrane // traceable author statement///0005887 // integral component of plasma membrane // inferred by curator///0005887 // integral component of plasma membrane // traceable author statement///0009986 // cell surface // inferred from direct assay///0016020 // me…	0004872 // receptor activity // traceable author statement///0004888 // transmembrane signaling receptor activity // traceable author statement///0005515 // protein binding // inferred from physical interaction///0008157 // protein phosphatase 1 binding // inferred from physical interaction///0023029 // MHC class Ib protein binding // inferred from physical interaction///0032396 // inhibitory MHC…	chr19:54720796-54746602 (-) // 97.18 // q13.42
212706_at	LOC102724229///RASA4	10156///102724229	0000165 // MAPK cascade // traceable author statement///0000186 // activation of MAPKK activity // traceable author statement///0007165 // signal transduction // inferred from electronic annotation///0007173 // epidermal growth factor receptor signaling pathway // traceable author statement///0007264 // small GTPase mediated signal transduction // traceable author statement///0007265 // Ras prote…	0005622 // intracellular // inferred from electronic annotation///0005737 // cytoplasm // not recorded///0005829 // cytosol // inferred from direct assay///0005829 // cytosol // traceable author statement///0005886 // plasma membrane // inferred from direct assay///0016020 // membrane // inferred from electronic annotation///0031235 // intrinsic component of the cytoplasmic side of the plasma mem…	0005096 // GTPase activator activity // inferred from direct assay///0005515 // protein binding // inferred from electronic annotation///0046872 // metal ion binding // inferred from electronic annotation	chr7:102219912-102257184 (-) // 82.89 // q22.1///chr7:102120749-102158205 (-) // 80.2 // q22.1
208534_s_at	LOC102724229///RASA4///RASA4B///RASA4CP	10156///401331///100271927///102724229	0000165 // MAPK cascade // traceable author statement///0000186 // activation of MAPKK activity // traceable author statement///0007165 // signal transduction // inferred from electronic annotation///0007173 // epidermal growth factor receptor signaling pathway // traceable author statement///0007264 // small GTPase mediated signal transduction // traceable author statement///0007265 // Ras prote…	0005622 // intracellular // inferred from electronic annotation///0005737 // cytoplasm // not recorded///0005829 // cytosol // inferred from direct assay///0005829 // cytosol // traceable author statement///0005829 // cytosol // inferred from electronic annotation///0005886 // plasma membrane // inferred from direct assay///0005886 // plasma membrane // inferred from electronic annotation///00160…	0005096 // GTPase activator activity // inferred from direct assay///0005096 // GTPase activator activity // inferred from electronic annotation///0005515 // protein binding // inferred from electronic annotation///0046872 // metal ion binding // inferred from electronic annotation	chr7:102223217-102257136 (-) // 99.92 // q22.1///chr7:102124038-102158157 (-) // 99.76 // q22.1
212707_s_at	LOC102724229///RASA4///RASA4B///RASA4CP	10156///401331///100271927///102724229	0000165 // MAPK cascade // traceable author statement///0000186 // activation of MAPKK activity // traceable author statement///0007165 // signal transduction // inferred from electronic annotation///0007173 // epidermal growth factor receptor signaling pathway // traceable author statement///0007264 // small GTPase mediated signal transduction // traceable author statement///0007265 // Ras prote…	0005622 // intracellular // inferred from electronic annotation///0005737 // cytoplasm // not recorded///0005829 // cytosol // inferred from direct assay///0005829 // cytosol // traceable author statement///0005829 // cytosol // inferred from electronic annotation///0005886 // plasma membrane // inferred from direct assay///0005886 // plasma membrane // inferred from electronic annotation///00160…	0005096 // GTPase activator activity // inferred from direct assay///0005096 // GTPase activator activity // inferred from electronic annotation///0005515 // protein binding // inferred from electronic annotation///0046872 // metal ion binding // inferred from electronic annotation	chr7:102219912-102257184 (-) // 82.89 // q22.1///chr7:102120749-102158205 (-) // 80.2 // q22.1
202625_at	LYN	4067	0001782 // B cell homeostasis // inferred from sequence or structural similarity///0001817 // regulation of cytokine production // inferred from sequence or structural similarity///0001932 // regulation of protein phosphorylation // traceable author statement///0001933 // negative regulation of protein phosphorylation // inferred from sequence or structural similarity///0002223 // stimulatory C-t…	0005634 // nucleus // inferred from direct assay///0005634 // nucleus // inferred from sequence or structural similarity///0005737 // cytoplasm // inferred from sequence or structural similarity///0005758 // mitochondrial intermembrane space // inferred from electronic annotation///0005794 // Golgi apparatus // inferred from direct assay///0005829 // cytosol // traceable author statement///000588…	0000166 // nucleotide binding // inferred from electronic annotation///0004672 // protein kinase activity // inferred from electronic annotation///0004713 // protein tyrosine kinase activity // not recorded///0004713 // protein tyrosine kinase activity // inferred from direct assay///0004713 // protein tyrosine kinase activity // traceable author statement///0004715 // non-membrane spanning prote…	chr8:56791985-56924592 (+) // 97.41 // q12.1
202626_s_at	LYN	4067	0001782 // B cell homeostasis // inferred from sequence or structural similarity///0001817 // regulation of cytokine production // inferred from sequence or structural similarity///0001932 // regulation of protein phosphorylation // traceable author statement///0001933 // negative regulation of protein phosphorylation // inferred from sequence or structural similarity///0002223 // stimulatory C-t…	0005634 // nucleus // inferred from direct assay///0005634 // nucleus // inferred from sequence or structural similarity///0005737 // cytoplasm // inferred from sequence or structural similarity///0005758 // mitochondrial intermembrane space // inferred from electronic annotation///0005794 // Golgi apparatus // inferred from direct assay///0005829 // cytosol // traceable author statement///000588…	0000166 // nucleotide binding // inferred from electronic annotation///0004672 // protein kinase activity // inferred from electronic annotation///0004713 // protein tyrosine kinase activity // not recorded///0004713 // protein tyrosine kinase activity // inferred from direct assay///0004713 // protein tyrosine kinase activity // traceable author statement///0004715 // non-membrane spanning prote…	chr8:56792371-56923131 (+) // 98.3 // q12.1
210754_s_at	LYN	4067	0001782 // B cell homeostasis // inferred from sequence or structural similarity///0001817 // regulation of cytokine production // inferred from sequence or structural similarity///0001932 // regulation of protein phosphorylation // traceable author statement///0001933 // negative regulation of protein phosphorylation // inferred from sequence or structural similarity///0002223 // stimulatory C-t…	0005634 // nucleus // inferred from direct assay///0005634 // nucleus // inferred from sequence or structural similarity///0005737 // cytoplasm // inferred from sequence or structural similarity///0005758 // mitochondrial intermembrane space // inferred from electronic annotation///0005794 // Golgi apparatus // inferred from direct assay///0005829 // cytosol // traceable author statement///000588…	0000166 // nucleotide binding // inferred from electronic annotation///0004672 // protein kinase activity // inferred from electronic annotation///0004713 // protein tyrosine kinase activity // not recorded///0004713 // protein tyrosine kinase activity // inferred from direct assay///0004713 // protein tyrosine kinase activity // traceable author statement///0004715 // non-membrane spanning prote…	chr8:56854412-56922687 (+) // 98.75 // q12.1
204388_s_at	MAOA	4128	0006576 // cellular biogenic amine metabolic process // traceable author statement///0006584 // catecholamine metabolic process // inferred from electronic annotation///0006805 // xenobiotic metabolic process // traceable author statement///0007268 // synaptic transmission // traceable author statement///0007269 // neurotransmitter secretion // traceable author statement///0042135 // neurotransmi…	0005739 // mitochondrion // inferred from direct assay///0005741 // mitochondrial outer membrane // traceable author statement///0016020 // membrane // inferred from electronic annotation///0016021 // integral component of membrane // inferred from electronic annotation	0005515 // protein binding // inferred from electronic annotation///0008131 // primary amine oxidase activity // traceable author statement///0016491 // oxidoreductase activity // inferred from electronic annotation///0050660 // flavin adenine dinucleotide binding // inferred from electronic annotation///0051378 // serotonin binding // inferred from electronic annotation	chrX:43515581-43604057 (+) // 98.03 // p11.3
204389_at	MAOA	4128	0006576 // cellular biogenic amine metabolic process // traceable author statement///0006584 // catecholamine metabolic process // inferred from electronic annotation///0006805 // xenobiotic metabolic process // traceable author statement///0007268 // synaptic transmission // traceable author statement///0007269 // neurotransmitter secretion // traceable author statement///0042135 // neurotransmi…	0005739 // mitochondrion // inferred from direct assay///0005741 // mitochondrial outer membrane // traceable author statement///0016020 // membrane // inferred from electronic annotation///0016021 // integral component of membrane // inferred from electronic annotation	0005515 // protein binding // inferred from electronic annotation///0008131 // primary amine oxidase activity // traceable author statement///0016491 // oxidoreductase activity // inferred from electronic annotation///0050660 // flavin adenine dinucleotide binding // inferred from electronic annotation///0051378 // serotonin binding // inferred from electronic annotation	chrX:43515581-43604057 (+) // 98.03 // p11.3
212741_at	MAOA	4128	0006576 // cellular biogenic amine metabolic process // traceable author statement///0006584 // catecholamine metabolic process // inferred from electronic annotation///0006805 // xenobiotic metabolic process // traceable author statement///0007268 // synaptic transmission // traceable author statement///0007269 // neurotransmitter secretion // traceable author statement///0042135 // neurotransmi…	0005739 // mitochondrion // inferred from direct assay///0005741 // mitochondrial outer membrane // traceable author statement///0016020 // membrane // inferred from electronic annotation///0016021 // integral component of membrane // inferred from electronic annotation	0005515 // protein binding // inferred from electronic annotation///0008131 // primary amine oxidase activity // traceable author statement///0016491 // oxidoreductase activity // inferred from electronic annotation///0050660 // flavin adenine dinucleotide binding // inferred from electronic annotation///0051378 // serotonin binding // inferred from electronic annotation	chrX:43603688-43606064 (+) // 98.63 // p11.3
204041_at	MAOB	4129	0006805 // xenobiotic metabolic process // traceable author statement///0009636 // response to toxic substance // inferred from electronic annotation///0010044 // response to aluminum ion // inferred from electronic annotation///0010269 // response to selenium ion // inferred from electronic annotation///0014063 // negative regulation of serotonin secretion // inferred from electronic annotation/…	0005739 // mitochondrion // inferred from direct assay///0005740 // mitochondrial envelope // traceable author statement///0005741 // mitochondrial outer membrane // traceable author statement///0005743 // mitochondrial inner membrane // inferred from electronic annotation///0016020 // membrane // inferred from electronic annotation///0016021 // integral component of membrane // inferred from ele…	0008131 // primary amine oxidase activity // traceable author statement///0009055 // electron carrier activity // traceable author statement///0016491 // oxidoreductase activity // inferred from electronic annotation///0042803 // protein homodimerization activity // inferred from electronic annotation///0050660 // flavin adenine dinucleotide binding // inferred from electronic annotation	chrX:43625857-43741622 (-) // 93.01 // p11.3
208351_s_at	MAPK1	5594	0000165 // MAPK cascade // traceable author statement///0000186 // activation of MAPKK activity // traceable author statement///0000187 // activation of MAPK activity // traceable author statement///0000189 // MAPK import into nucleus // inferred from electronic annotation///0002224 // toll-like receptor signaling pathway // traceable author statement///0002755 // MyD88-dependent toll-like recept…	0005622 // intracellular // inferred from electronic annotation///0005634 // nucleus // inferred from direct assay///0005634 // nucleus // traceable author statement///0005654 // nucleoplasm // inferred from direct assay///0005654 // nucleoplasm // traceable author statement///0005737 // cytoplasm // inferred from direct assay///0005737 // cytoplasm // inferred from sequence or structural similar…	0000166 // nucleotide binding // inferred from electronic annotation///0001784 // phosphotyrosine binding // inferred from electronic annotation///0003677 // DNA binding // inferred from electronic annotation///0004672 // protein kinase activity // inferred from electronic annotation///0004674 // protein serine/threonine kinase activity // inferred from direct assay///0004707 // MAP kinase activi…	chr22:22118344-22221929 (-) // 87.71 // q11.21
212271_at	MAPK1	5594	0000165 // MAPK cascade // traceable author statement///0000186 // activation of MAPKK activity // traceable author statement///0000187 // activation of MAPK activity // traceable author statement///0000189 // MAPK import into nucleus // inferred from electronic annotation///0002224 // toll-like receptor signaling pathway // traceable author statement///0002755 // MyD88-dependent toll-like recept…	0005622 // intracellular // inferred from electronic annotation///0005634 // nucleus // inferred from direct assay///0005634 // nucleus // traceable author statement///0005654 // nucleoplasm // inferred from direct assay///0005654 // nucleoplasm // traceable author statement///0005737 // cytoplasm // inferred from direct assay///0005737 // cytoplasm // inferred from sequence or structural similar…	0000166 // nucleotide binding // inferred from electronic annotation///0001784 // phosphotyrosine binding // inferred from electronic annotation///0003677 // DNA binding // inferred from electronic annotation///0004672 // protein kinase activity // inferred from electronic annotation///0004674 // protein serine/threonine kinase activity // inferred from direct assay///0004707 // MAP kinase activi…	chr22:22116311-22221722 (-) // 96.48 // q11.21
207309_at	NOS1	4842	0001666 // response to hypoxia // inferred from expression pattern///0002028 // regulation of sodium ion transport // inferred from sequence or structural similarity///0006527 // arginine catabolic process // inferred by curator///0006809 // nitric oxide biosynthetic process // inferred from sequence or structural similarity///0006936 // muscle contraction // not recorded///0006941 // striated mu…	0001917 // photoreceptor inner segment // inferred from sequence or structural similarity///0005634 // nucleus // inferred from electronic annotation///0005737 // cytoplasm // traceable author statement///0005739 // mitochondrion // inferred from sequence or structural similarity///0005741 // mitochondrial outer membrane // inferred from electronic annotation///0005829 // cytosol // not recorded/…	0003958 // NADPH-hemoprotein reductase activity // not recorded///0004517 // nitric-oxide synthase activity // inferred from direct assay///0004517 // nitric-oxide synthase activity // inferred from sequence or structural similarity///0005506 // iron ion binding // inferred from electronic annotation///0005515 // protein binding // inferred from physical interaction///0005516 // calmodulin bindin…	chr12:117650978-117799582 (-) // 99.37 // q24.22
207310_s_at	NOS1	4842	0001666 // response to hypoxia // inferred from expression pattern///0002028 // regulation of sodium ion transport // inferred from sequence or structural similarity///0006527 // arginine catabolic process // inferred by curator///0006809 // nitric oxide biosynthetic process // inferred from sequence or structural similarity///0006936 // muscle contraction // not recorded///0006941 // striated mu…	0001917 // photoreceptor inner segment // inferred from sequence or structural similarity///0005634 // nucleus // inferred from electronic annotation///0005737 // cytoplasm // traceable author statement///0005739 // mitochondrion // inferred from sequence or structural similarity///0005741 // mitochondrial outer membrane // inferred from electronic annotation///0005829 // cytosol // not recorded/…	0003958 // NADPH-hemoprotein reductase activity // not recorded///0004517 // nitric-oxide synthase activity // inferred from direct assay///0004517 // nitric-oxide synthase activity // inferred from sequence or structural similarity///0005506 // iron ion binding // inferred from electronic annotation///0005515 // protein binding // inferred from physical interaction///0005516 // calmodulin bindin…	chr12:117653085-117768884 (-) // 99.91 // q24.22
215153_at	NOS1AP	9722	0003062 // regulation of heart rate by chemical signal // inferred from mutant phenotype///0010628 // positive regulation of gene expression // inferred from sequence or structural similarity///0010750 // positive regulation of nitric oxide mediated signal transduction // inferred from sequence or structural similarity///0042981 // regulation of apoptotic process // non-traceable author statement…	0005634 // nucleus // inferred from sequence or structural similarity///0005739 // mitochondrion // inferred from sequence or structural similarity///0005829 // cytosol // inferred from sequence or structural similarity///0005901 // caveola // inferred from sequence or structural similarity///0030018 // Z disc // inferred from sequence or structural similarity///0030315 // T-tubule // inferred fr…	0005515 // protein binding // inferred from physical interaction///0050998 // nitric-oxide synthase binding // inferred from sequence or structural similarity	chr1:162039580-162338261 (+) // 97.57 // q23.3
210037_s_at	NOS2	4843	0001666 // response to hypoxia // inferred from electronic annotation///0001912 // positive regulation of leukocyte mediated cytotoxicity // traceable author statement///0002227 // innate immune response in mucosa // non-traceable author statement///0006527 // arginine catabolic process // inferred from direct assay///0006801 // superoxide metabolic process // inferred from sequence or structural…	0005622 // intracellular // inferred from direct assay///0005634 // nucleus // inferred from sequence or structural similarity///0005737 // cytoplasm // inferred from direct assay///0005777 // peroxisome // inferred from direct assay///0005829 // cytosol // inferred from mutant phenotype///0005829 // cytosol // traceable author statement///0030863 // cortical cytoskeleton // inferred from electro…	0003958 // NADPH-hemoprotein reductase activity // not recorded///0004517 // nitric-oxide synthase activity // inferred from direct assay///0005102 // receptor binding // inferred from physical interaction///0005506 // iron ion binding // inferred from electronic annotation///0005515 // protein binding // inferred from physical interaction///0005516 // calmodulin binding // inferred from electron…	chr17:26084214-26125910 (-) // 99.92 // q11.2
205581_s_at	NOS3	4846	0001525 // angiogenesis // inferred from electronic annotation///0001542 // ovulation from ovarian follicle // inferred from electronic annotation///0001701 // in utero embryonic development // inferred from electronic annotation///0001974 // blood vessel remodeling // inferred from sequence or structural similarity///0002028 // regulation of sodium ion transport // inferred from electronic annot…	0000139 // Golgi membrane // traceable author statement///0005634 // nucleus // inferred from sequence or structural similarity///0005737 // cytoplasm // inferred from direct assay///0005794 // Golgi apparatus // inferred from electronic annotation///0005829 // cytosol // not recorded///0005829 // cytosol // traceable author statement///0005856 // cytoskeleton // inferred from electronic annotati…	0003785 // actin monomer binding // inferred from physical interaction///0003958 // NADPH-hemoprotein reductase activity // not recorded///0004517 // nitric-oxide synthase activity // inferred from direct assay///0004517 // nitric-oxide synthase activity // inferred from mutant phenotype///0005506 // iron ion binding // inferred from electronic annotation///0005515 // protein binding // inferred …	chr7:150690871-150711315 (+) // 99.11 // q36.1
206899_at	NTSR2	23620	0007165 // signal transduction // inferred from electronic annotation///0007166 // cell surface receptor signaling pathway // traceable author statement///0007186 // G-protein coupled receptor signaling pathway // inferred from electronic annotation///0007200 // phospholipase C-activating G-protein coupled receptor signaling pathway // inferred from electronic annotation///0007218 // neuropeptide…	0005886 // plasma membrane // traceable author statement///0005887 // integral component of plasma membrane // traceable author statement///0016020 // membrane // inferred from electronic annotation///0016021 // integral component of membrane // inferred from electronic annotation	0004871 // signal transducer activity // inferred from electronic annotation///0004930 // G-protein coupled receptor activity // traceable author statement///0016492 // G-protein coupled neurotensin receptor activity // inferred from electronic annotation	chr2:11798304-11810290 (-) // 85.34 // p25.1
203446_s_at	OCRL	4952	0001701 // in utero embryonic development // inferred from electronic annotation///0006629 // lipid metabolic process // non-traceable author statement///0006644 // phospholipid metabolic process // traceable author statement///0006661 // phosphatidylinositol biosynthetic process // traceable author statement///0007165 // signal transduction // inferred from electronic annotation///0007264 // sma…	0001750 // photoreceptor outer segment // inferred from direct assay///0005634 // nucleus // inferred from direct assay///0005737 // cytoplasm // inferred from direct assay///0005768 // endosome // inferred from electronic annotation///0005769 // early endosome // inferred from direct assay///0005794 // Golgi apparatus // inferred from electronic annotation///0005795 // Golgi stack // traceable a…	0004439 // phosphatidylinositol-4,5-bisphosphate 5-phosphatase activity // inferred from electronic annotation///0005096 // GTPase activator activity // inferred from direct assay///0005515 // protein binding // inferred from physical interaction///0016787 // hydrolase activity // inferred from electronic annotation///0048365 // Rac GTPase binding // inferred from physical interaction///0052745 /…	chrX:128674251-128726528 (+) // 98.39 // q25
208316_s_at	OCRL	4952	0001701 // in utero embryonic development // inferred from electronic annotation///0006470 // protein dephosphorylation // inferred from electronic annotation///0006629 // lipid metabolic process // non-traceable author statement///0006644 // phospholipid metabolic process // traceable author statement///0006661 // phosphatidylinositol biosynthetic process // traceable author statement///0007165 …	0001750 // photoreceptor outer segment // inferred from direct assay///0005634 // nucleus // inferred from direct assay///0005737 // cytoplasm // inferred from direct assay///0005768 // endosome // inferred from electronic annotation///0005769 // early endosome // inferred from direct assay///0005794 // Golgi apparatus // inferred from electronic annotation///0005795 // Golgi stack // traceable a…	0004439 // phosphatidylinositol-4,5-bisphosphate 5-phosphatase activity // inferred from electronic annotation///0005096 // GTPase activator activity // inferred from direct assay///0005515 // protein binding // inferred from physical interaction///0016787 // hydrolase activity // inferred from electronic annotation///0048365 // Rac GTPase binding // inferred from physical interaction///0052745 /…	chrX:128674251-128725678 (+) // 96.94 // q25
212518_at	PIP5K1C	23396	0006644 // phospholipid metabolic process // traceable author statement///0006661 // phosphatidylinositol biosynthetic process // traceable author statement///0006887 // exocytosis // inferred from electronic annotation///0006897 // endocytosis // inferred from electronic annotation///0006909 // phagocytosis // traceable author statement///0006935 // chemotaxis // inferred from electronic annotat…	0001891 // phagocytic cup // inferred from electronic annotation///0001931 // uropod // traceable author statement///0005634 // nucleus // inferred from electronic annotation///0005737 // cytoplasm // inferred from electronic annotation///0005829 // cytosol // traceable author statement///0005886 // plasma membrane // inferred from electronic annotation///0005912 // adherens junction // inferred …	0000166 // nucleotide binding // inferred from electronic annotation///0005515 // protein binding // inferred from physical interaction///0005524 // ATP binding // inferred from electronic annotation///0016301 // kinase activity // inferred from electronic annotation///0016307 // phosphatidylinositol phosphate kinase activity // inferred from electronic annotation///0016308 // 1-phosphatidylinosi…	chr19:3630180-3700445 (-) // 97.74 // p13.3
220811_at	PRG3	10394	0001694 // histamine biosynthetic process // inferred from direct assay///0006955 // immune response // inferred from electronic annotation///0017148 // negative regulation of translation // inferred from direct assay///0019370 // leukotriene biosynthetic process // inferred from direct assay///0042119 // neutrophil activation // inferred from direct assay///0042554 // superoxide anion generation…	0005576 // extracellular region // not recorded	0030246 // carbohydrate binding // inferred from electronic annotation	chr11:57144242-57148623 (-) // 99.77 // q12.1
34478_at	RAB11B	9230	0001881 // receptor recycling // inferred from sequence or structural similarity///0006810 // transport // inferred from electronic annotation///0006886 // intracellular protein transport // not recorded///0006913 // nucleocytoplasmic transport // inferred from electronic annotation///0007165 // signal transduction // inferred from electronic annotation///0007264 // small GTPase mediated signal t…	0005622 // intracellular // inferred from electronic annotation///0005737 // cytoplasm // inferred from electronic annotation///0005739 // mitochondrion // inferred from electronic annotation///0005768 // endosome // inferred from electronic annotation///0005815 // microtubule organizing center // inferred from direct assay///0005886 // plasma membrane // inferred from direct assay///0008021 // s…	0000166 // nucleotide binding // inferred from electronic annotation///0003924 // GTPase activity // inferred from direct assay///0005515 // protein binding // inferred from physical interaction///0005525 // GTP binding // inferred from direct assay///0019003 // GDP binding // inferred from direct assay///0031489 // myosin V binding // inferred from physical interaction	chr19:8454778-8468677 (+) // 76.53 // p13.2
217793_at	RAB11B	9230	0001881 // receptor recycling // inferred from sequence or structural similarity///0006810 // transport // inferred from electronic annotation///0006886 // intracellular protein transport // not recorded///0006913 // nucleocytoplasmic transport // inferred from electronic annotation///0007165 // signal transduction // inferred from electronic annotation///0007264 // small GTPase mediated signal t…	0005622 // intracellular // inferred from electronic annotation///0005737 // cytoplasm // inferred from electronic annotation///0005739 // mitochondrion // inferred from electronic annotation///0005768 // endosome // inferred from electronic annotation///0005815 // microtubule organizing center // inferred from direct assay///0005886 // plasma membrane // inferred from direct assay///0008021 // s…	0000166 // nucleotide binding // inferred from electronic annotation///0003924 // GTPase activity // inferred from direct assay///0005515 // protein binding // inferred from physical interaction///0005525 // GTP binding // inferred from direct assay///0019003 // GDP binding // inferred from direct assay///0031489 // myosin V binding // inferred from physical interaction	chr19:8455253-8469318 (+) // 90.12 // p13.2
219681_s_at	RAB11FIP1	80223	0006810 // transport // inferred from electronic annotation///0015031 // protein transport // inferred from electronic annotation///0045055 // regulated secretory pathway // not recorded///0070164 // negative regulation of adiponectin secretion // inferred from direct assay	0005737 // cytoplasm // inferred from direct assay///0005768 // endosome // inferred from electronic annotation///0016020 // membrane // inferred from electronic annotation///0030670 // phagocytic vesicle membrane // inferred from electronic annotation///0031410 // cytoplasmic vesicle // inferred from electronic annotation///0043231 // intracellular membrane-bounded organelle // inferred from dir…	0005515 // protein binding // inferred from electronic annotation///0017137 // Rab GTPase binding // not recorded	chr8:37718186-37757015 (-) // 97.41 // p11.23
203883_s_at	RAB11FIP2	22841	0003091 // renal water homeostasis // traceable author statement///0006810 // transport // inferred from electronic annotation///0006833 // water transport // traceable author statement///0015031 // protein transport // inferred from electronic annotation///0030010 // establishment of cell polarity // inferred from mutant phenotype///0035773 // insulin secretion involved in cellular response to g…	0005654 // nucleoplasm // inferred from direct assay///0005737 // cytoplasm // not recorded///0005768 // endosome // inferred from direct assay///0005886 // plasma membrane // inferred from electronic annotation///0016020 // membrane // inferred from electronic annotation///0030659 // cytoplasmic vesicle membrane // traceable author statement///0043231 // intracellular membrane-bounded organelle …	0005515 // protein binding // inferred from physical interaction///0017137 // Rab GTPase binding // not recorded///0019901 // protein kinase binding // inferred from physical interaction///0042803 // protein homodimerization activity // inferred from physical interaction	chr10:119764428-119806303 (-) // 96.67 // q26.11
203884_s_at	RAB11FIP2	22841	0003091 // renal water homeostasis // traceable author statement///0006810 // transport // inferred from electronic annotation///0006833 // water transport // traceable author statement///0015031 // protein transport // inferred from electronic annotation///0030010 // establishment of cell polarity // inferred from mutant phenotype///0035773 // insulin secretion involved in cellular response to g…	0005654 // nucleoplasm // inferred from direct assay///0005737 // cytoplasm // not recorded///0005768 // endosome // inferred from direct assay///0005886 // plasma membrane // inferred from electronic annotation///0016020 // membrane // inferred from electronic annotation///0030659 // cytoplasmic vesicle membrane // traceable author statement///0043231 // intracellular membrane-bounded organelle …	0005515 // protein binding // inferred from physical interaction///0017137 // Rab GTPase binding // not recorded///0019901 // protein kinase binding // inferred from physical interaction///0042803 // protein homodimerization activity // inferred from physical interaction	chr10:119764428-119806114 (-) // 97.8 // q26.11
203933_at	RAB11FIP3	9727	0000910 // cytokinesis // inferred from mutant phenotype///0006810 // transport // inferred from electronic annotation///0006996 // organelle organization // traceable author statement///0007049 // cell cycle // inferred from electronic annotation///0016192 // vesicle-mediated transport // traceable author statement///0032456 // endocytic recycling // inferred from direct assay///0051301 // cell …	0005654 // nucleoplasm // inferred from direct assay///0005737 // cytoplasm // inferred from electronic annotation///0005768 // endosome // inferred from direct assay///0005813 // centrosome // inferred from direct assay///0005815 // microtubule organizing center // inferred from direct assay///0005829 // cytosol // traceable author statement///0005856 // cytoskeleton // inferred from electronic …	0005509 // calcium ion binding // inferred from electronic annotation///0005515 // protein binding // inferred from physical interaction///0017137 // Rab GTPase binding // inferred from physical interaction///0017137 // Rab GTPase binding // non-traceable author statement///0030306 // ADP-ribosylation factor binding // inferred from physical interaction///0042803 // protein homodimerization activ…	chr16:475618-572261 (+) // 92.75 // p13.3
214999_s_at	RAB11FIP3	9727	0000910 // cytokinesis // inferred from mutant phenotype///0006810 // transport // inferred from electronic annotation///0006996 // organelle organization // traceable author statement///0007049 // cell cycle // inferred from electronic annotation///0016192 // vesicle-mediated transport // traceable author statement///0032456 // endocytic recycling // inferred from direct assay///0051301 // cell …	0005654 // nucleoplasm // inferred from direct assay///0005737 // cytoplasm // inferred from electronic annotation///0005768 // endosome // inferred from direct assay///0005813 // centrosome // inferred from direct assay///0005815 // microtubule organizing center // inferred from direct assay///0005829 // cytosol // traceable author statement///0005856 // cytoskeleton // inferred from electronic …	0005509 // calcium ion binding // inferred from electronic annotation///0005515 // protein binding // inferred from physical interaction///0017137 // Rab GTPase binding // inferred from physical interaction///0017137 // Rab GTPase binding // non-traceable author statement///0030306 // ADP-ribosylation factor binding // inferred from physical interaction///0042803 // protein homodimerization activ…	chr16:511403-547448 (+) // 98.54 // p13.3
210879_s_at	RAB11FIP5	26056	0006810 // transport // inferred from electronic annotation///0015031 // protein transport // inferred from electronic annotation///0035773 // insulin secretion involved in cellular response to glucose stimulus // inferred from sequence or structural similarity///0045055 // regulated secretory pathway // not recorded///0045055 // regulated secretory pathway // inferred from sequence or structural…	0000139 // Golgi membrane // inferred from electronic annotation///0005737 // cytoplasm // not recorded///0005739 // mitochondrion // not recorded///0005741 // mitochondrial outer membrane // inferred from direct assay///0005768 // endosome // inferred from electronic annotation///0005769 // early endosome // not recorded///0005769 // early endosome // inferred from sequence or structural similar…	0005515 // protein binding // inferred from physical interaction///0017137 // Rab GTPase binding // not recorded///0043015 // gamma-tubulin binding // inferred from direct assay	chr2:73300510-73340145 (-) // 96.82 // p13.2
218186_at	RAB25	57111	0003382 // epithelial cell morphogenesis // inferred from sequence or structural similarity///0006810 // transport // inferred from electronic annotation///0006886 // intracellular protein transport // not recorded///0006887 // exocytosis // not recorded///0006913 // nucleocytoplasmic transport // inferred from electronic annotation///0007165 // signal transduction // inferred from electronic ann…	0005622 // intracellular // inferred from electronic annotation///0005886 // plasma membrane // inferred from electronic annotation///0016020 // membrane // inferred from electronic annotation///0016023 // cytoplasmic membrane-bounded vesicle // inferred from electronic annotation///0031143 // pseudopodium // inferred from direct assay///0031260 // pseudopodium membrane // inferred from electroni…	0000166 // nucleotide binding // inferred from electronic annotation///0003924 // GTPase activity // not recorded///0005515 // protein binding // inferred from physical interaction///0005525 // GTP binding // inferred from electronic annotation///0031489 // myosin V binding // inferred from physical interaction	chr1:156030981-156040248 (+) // 99.41 // q22
208466_at	RAB3D	9545	0006810 // transport // inferred from electronic annotation///0006886 // intracellular protein transport // not recorded///0006887 // exocytosis // inferred from electronic annotation///0006904 // vesicle docking involved in exocytosis // not recorded///0006913 // nucleocytoplasmic transport // inferred from electronic annotation///0007165 // signal transduction // inferred from electronic annota…	0005622 // intracellular // inferred from electronic annotation///0005739 // mitochondrion // inferred from electronic annotation///0005768 // endosome // not recorded///0005886 // plasma membrane // not recorded///0008021 // synaptic vesicle // not recorded///0016020 // membrane // inferred from electronic annotation///0030133 // transport vesicle // inferred from electronic annotation///0030667…	0000166 // nucleotide binding // inferred from electronic annotation///0003924 // GTPase activity // traceable author statement///0005515 // protein binding // inferred from electronic annotation///0005525 // GTP binding // inferred from electronic annotation///0031489 // myosin V binding // inferred from physical interaction///0051020 // GTPase binding // inferred from electronic annotation	chr19:11436073-11450255 (-) // 99.76 // p13.2
206220_s_at	RASA3	22821	0000165 // MAPK cascade // traceable author statement///0000186 // activation of MAPKK activity // traceable author statement///0007165 // signal transduction // traceable author statement///0007173 // epidermal growth factor receptor signaling pathway // traceable author statement///0007264 // small GTPase mediated signal transduction // traceable author statement///0007265 // Ras protein signal…	0005737 // cytoplasm // not recorded///0005829 // cytosol // traceable author statement///0005886 // plasma membrane // inferred from electronic annotation///0016020 // membrane // inferred from electronic annotation///0031235 // intrinsic component of the cytoplasmic side of the plasma membrane // inferred from direct assay	0005096 // GTPase activator activity // inferred from electronic annotation///0005515 // protein binding // inferred from electronic annotation///0015278 // calcium-release channel activity // inferred from direct assay///0046872 // metal ion binding // inferred from electronic annotation	chr13:114748739-114898010 (-) // 99.61 // q34
206221_at	RASA3	22821	0000165 // MAPK cascade // traceable author statement///0000186 // activation of MAPKK activity // traceable author statement///0007165 // signal transduction // traceable author statement///0007173 // epidermal growth factor receptor signaling pathway // traceable author statement///0007264 // small GTPase mediated signal transduction // traceable author statement///0007265 // Ras protein signal…	0005737 // cytoplasm // not recorded///0005829 // cytosol // traceable author statement///0005886 // plasma membrane // inferred from electronic annotation///0016020 // membrane // inferred from electronic annotation///0031235 // intrinsic component of the cytoplasmic side of the plasma membrane // inferred from direct assay	0005096 // GTPase activator activity // inferred from electronic annotation///0005515 // protein binding // inferred from electronic annotation///0015278 // calcium-release channel activity // inferred from direct assay///0046872 // metal ion binding // inferred from electronic annotation	chr13:114748739-114898010 (-) // 99.61 // q34
206851_at	RNASE3	6037	0002227 // innate immune response in mucosa // inferred from direct assay///0006401 // RNA catabolic process // traceable author statement///0019731 // antibacterial humoral response // inferred from direct assay///0042742 // defense response to bacterium // inferred from electronic annotation///0050830 // defense response to Gram-positive bacterium // inferred from direct assay///0090305 // nucl…	0005576 // extracellular region // traceable author statement///0005615 // extracellular space // inferred from direct assay///0070062 // extracellular exosome // inferred from direct assay	0003676 // nucleic acid binding // inferred from electronic annotation///0004518 // nuclease activity // inferred from electronic annotation///0004519 // endonuclease activity // not recorded///0004540 // ribonuclease activity // traceable author statement///0016787 // hydrolase activity // inferred from electronic annotation	chr14:21359556-21360509 (+) // 99.31 // q11.2
202598_at	S100A13	6284	0006810 // transport // inferred from electronic annotation///0008284 // positive regulation of cell proliferation // inferred from electronic annotation///0008360 // regulation of cell shape // inferred from electronic annotation///0015031 // protein transport // inferred from electronic annotation///0043123 // positive regulation of I-kappaB kinase/NF-kappaB signaling // inferred from direct as…	0005576 // extracellular region // inferred from electronic annotation///0005615 // extracellular space // inferred from direct assay///0005634 // nucleus // inferred from direct assay///0005737 // cytoplasm // inferred from direct assay///0005829 // cytosol // inferred from direct assay///0042629 // mast cell granule // non-traceable author statement///0048471 // perinuclear region of cytoplasm …	0005507 // copper ion binding // inferred from direct assay///0005509 // calcium ion binding // inferred from direct assay///0005515 // protein binding // inferred from physical interaction///0008270 // zinc ion binding // inferred from direct assay///0008289 // lipid binding // inferred from electronic annotation///0017134 // fibroblast growth factor binding // inferred from physical interaction…	chr1:153591283-153599010 (-) // 92.72 // q21.3
213481_at	S100A13	6284	0006810 // transport // inferred from electronic annotation///0008284 // positive regulation of cell proliferation // inferred from electronic annotation///0008360 // regulation of cell shape // inferred from electronic annotation///0015031 // protein transport // inferred from electronic annotation///0043123 // positive regulation of I-kappaB kinase/NF-kappaB signaling // inferred from direct as…	0005576 // extracellular region // inferred from electronic annotation///0005615 // extracellular space // inferred from direct assay///0005634 // nucleus // inferred from direct assay///0005737 // cytoplasm // inferred from direct assay///0005829 // cytosol // inferred from direct assay///0042629 // mast cell granule // non-traceable author statement///0048471 // perinuclear region of cytoplasm …	0005507 // copper ion binding // inferred from direct assay///0005509 // calcium ion binding // inferred from direct assay///0005515 // protein binding // inferred from physical interaction///0008270 // zinc ion binding // inferred from direct assay///0008289 // lipid binding // inferred from electronic annotation///0017134 // fibroblast growth factor binding // inferred from physical interaction…	chr1:153606447-153614761 (-) // 98.92 // q21.3
200945_s_at	SEC31A	22872	0002474 // antigen processing and presentation of peptide antigen via MHC class I // traceable author statement///0006810 // transport // inferred from electronic annotation///0006888 // ER to Golgi vesicle-mediated transport // non-traceable author statement///0006888 // ER to Golgi vesicle-mediated transport // traceable author statement///0015031 // protein transport // inferred from electroni…	0000139 // Golgi membrane // traceable author statement///0005737 // cytoplasm // inferred from direct assay///0005783 // endoplasmic reticulum // inferred from direct assay///0005789 // endoplasmic reticulum membrane // traceable author statement///0005829 // cytosol // traceable author statement///0012507 // ER to Golgi transport vesicle membrane // traceable author statement///0016020 // membr…	0005515 // protein binding // inferred from physical interaction///0048306 // calcium-dependent protein binding // inferred from physical interaction	chr4:83739814-83812289 (-) // 99.93 // q21.22
210616_s_at	SEC31A	22872	0002474 // antigen processing and presentation of peptide antigen via MHC class I // traceable author statement///0006810 // transport // inferred from electronic annotation///0006888 // ER to Golgi vesicle-mediated transport // non-traceable author statement///0006888 // ER to Golgi vesicle-mediated transport // traceable author statement///0015031 // protein transport // inferred from electroni…	0000139 // Golgi membrane // traceable author statement///0005737 // cytoplasm // inferred from direct assay///0005783 // endoplasmic reticulum // inferred from direct assay///0005789 // endoplasmic reticulum membrane // traceable author statement///0005829 // cytosol // traceable author statement///0012507 // ER to Golgi transport vesicle membrane // traceable author statement///0016020 // membr…	0005515 // protein binding // inferred from physical interaction///0048306 // calcium-dependent protein binding // inferred from physical interaction	chr4:83740174-83821691 (-) // 99.54 // q21.22
208253_at	SIGLEC8	27181	0007155 // cell adhesion // inferred from electronic annotation///0007165 // signal transduction // traceable author statement	0016020 // membrane // inferred from electronic annotation///0016021 // integral component of membrane // inferred from electronic annotation	0004888 // transmembrane signaling receptor activity // traceable author statement///0005515 // protein binding // inferred from physical interaction///0030246 // carbohydrate binding // inferred from electronic annotation	chr19:51954262-51961689 (-) // 69.59 // q13.41
216327_s_at	SIGLEC8	27181	0007155 // cell adhesion // inferred from electronic annotation///0007165 // signal transduction // traceable author statement	0016020 // membrane // inferred from electronic annotation///0016021 // integral component of membrane // inferred from electronic annotation	0004888 // transmembrane signaling receptor activity // traceable author statement///0005515 // protein binding // inferred from physical interaction///0030246 // carbohydrate binding // inferred from electronic annotation	chr19:51955588-51961689 (-) // 96.61 // q13.41
216328_at	SIGLEC8	27181	0007155 // cell adhesion // inferred from electronic annotation///0007165 // signal transduction // traceable author statement	0016020 // membrane // inferred from electronic annotation///0016021 // integral component of membrane // inferred from electronic annotation	0004888 // transmembrane signaling receptor activity // traceable author statement///0005515 // protein binding // inferred from physical interaction///0030246 // carbohydrate binding // inferred from electronic annotation	chr19:51955588-51961689 (-) // 96.61 // q13.41
205421_at	SLC22A3	6581	0006810 // transport // inferred from electronic annotation///0006811 // ion transport // inferred from electronic annotation///0006855 // drug transmembrane transport // traceable author statement///0015695 // organic cation transport // inferred from direct assay///0015697 // quaternary ammonium group transport // inferred from direct assay///0015844 // monoamine transport // inferred from elec…	0005886 // plasma membrane // traceable author statement///0005887 // integral component of plasma membrane // traceable author statement///0016020 // membrane // traceable author statement///0016021 // integral component of membrane // inferred from electronic annotation	0005215 // transporter activity // inferred from electronic annotation///0005329 // dopamine transmembrane transporter activity // not recorded///0005515 // protein binding // inferred from physical interaction///0015075 // ion transmembrane transporter activity // inferred from electronic annotation///0015101 // organic cation transmembrane transporter activity // inferred from direct assay///00…	chr6:160769424-160873603 (+) // 99.0 // q25.3
221752_at	SSH1	54434	0000902 // cell morphogenesis // inferred from mutant phenotype///0006470 // protein dephosphorylation // inferred from mutant phenotype///0008064 // regulation of actin polymerization or depolymerization // not recorded///0010591 // regulation of lamellipodium assembly // not recorded///0016311 // dephosphorylation // inferred from electronic annotation///0030036 // actin cytoskeleton organizati…	0005654 // nucleoplasm // inferred from direct assay///0005737 // cytoplasm // inferred from direct assay///0005856 // cytoskeleton // inferred from electronic annotation///0005886 // plasma membrane // inferred from direct assay///0030027 // lamellipodium // inferred from electronic annotation///0030496 // midbody // inferred from electronic annotation///0032154 // cleavage furrow // inferred fr…	0003677 // DNA binding // inferred from electronic annotation///0003779 // actin binding // inferred from direct assay///0004721 // phosphoprotein phosphatase activity // inferred from direct assay///0004721 // phosphoprotein phosphatase activity // inferred from mutant phenotype///0004725 // protein tyrosine phosphatase activity // inferred from electronic annotation///0005515 // protein binding…	chr12:109176201-109198954 (-) // 92.26 // q24.11
221753_at	SSH1	54434	0000902 // cell morphogenesis // inferred from mutant phenotype///0006470 // protein dephosphorylation // inferred from mutant phenotype///0008064 // regulation of actin polymerization or depolymerization // not recorded///0010591 // regulation of lamellipodium assembly // not recorded///0016311 // dephosphorylation // inferred from electronic annotation///0016311 // dephosphorylation // ---///00…	0005654 // nucleoplasm // inferred from direct assay///0005737 // cytoplasm // inferred from direct assay///0005856 // cytoskeleton // inferred from electronic annotation///0005886 // plasma membrane // inferred from direct assay///0030027 // lamellipodium // inferred from electronic annotation///0030496 // midbody // inferred from electronic annotation///0032154 // cleavage furrow // inferred fr…	0003677 // DNA binding // inferred from electronic annotation///0003779 // actin binding // inferred from direct assay///0004721 // phosphoprotein phosphatase activity // inferred from direct assay///0004721 // phosphoprotein phosphatase activity // inferred from mutant phenotype///0004725 // protein tyrosine phosphatase activity // inferred from electronic annotation///0005515 // protein binding…	chr12:109176201-109198954 (-) // 92.26 // q24.11
215009_s_at	THAP9-AS1	100499177				chr4:83814701-83821696 (-) // 37.95 // q21.22
219206_x_at	TMBIM4	51643	0006915 // apoptotic process // inferred from electronic annotation///0043066 // negative regulation of apoptotic process // inferred from mutant phenotype///0050848 // regulation of calcium-mediated signaling // inferred from direct assay	0000139 // Golgi membrane // inferred from electronic annotation///0005794 // Golgi apparatus // inferred from electronic annotation///0005795 // Golgi stack // inferred from direct assay///0016020 // membrane // inferred from electronic annotation///0016021 // integral component of membrane // inferred from electronic annotation	0005515 // protein binding // inferred from physical interaction	chr12:66531191-66563764 (-) // 76.53 // q14.3
207216_at	TNFSF8	944	0006915 // apoptotic process // traceable author statement///0006955 // immune response // inferred from electronic annotation///0007165 // signal transduction // traceable author statement///0007267 // cell-cell signaling // traceable author statement///0008283 // cell proliferation // traceable author statement///0043374 // CD8-positive, alpha-beta T cell differentiation // inferred from electr…	0005615 // extracellular space // inferred from electronic annotation///0005887 // integral component of plasma membrane // traceable author statement///0016020 // membrane // inferred from electronic annotation///0016021 // integral component of membrane // inferred from electronic annotation	0005102 // receptor binding // traceable author statement///0005125 // cytokine activity // inferred from electronic annotation///0005164 // tumor necrosis factor receptor binding // inferred from electronic annotation///0005515 // protein binding // inferred from electronic annotation	chr9:117665499-117692697 (-) // 54.25 // q32
211943_x_at	TPT1	7178	0006816 // calcium ion transport // inferred by curator///0006874 // cellular calcium ion homeostasis // inferred by curator///0009615 // response to virus // inferred from expression pattern///0019827 // stem cell population maintenance // inferred from electronic annotation///0042981 // regulation of apoptotic process // non-traceable author statement///0043066 // negative regulation of apoptot…	0005615 // extracellular space // inferred from direct assay///0005634 // nucleus // inferred from direct assay///0005654 // nucleoplasm // inferred from electronic annotation///0005737 // cytoplasm // inferred from direct assay///0005737 // cytoplasm // traceable author statement///0005771 // multivesicular body // inferred from direct assay///0045298 // tubulin complex // inferred from direct a…	0005509 // calcium ion binding // inferred from direct assay///0005515 // protein binding // inferred from physical interaction///0008134 // transcription factor binding // inferred from electronic annotation///0044822 // poly(A) RNA binding // inferred from direct assay	chr13:45911000-45915306 (-) // 91.26 // q14.13
212284_x_at	TPT1	7178	0006816 // calcium ion transport // inferred by curator///0006874 // cellular calcium ion homeostasis // inferred by curator///0009615 // response to virus // inferred from expression pattern///0019827 // stem cell population maintenance // inferred from electronic annotation///0042981 // regulation of apoptotic process // non-traceable author statement///0043066 // negative regulation of apoptot…	0005615 // extracellular space // inferred from direct assay///0005634 // nucleus // inferred from direct assay///0005654 // nucleoplasm // inferred from electronic annotation///0005737 // cytoplasm // inferred from direct assay///0005737 // cytoplasm // traceable author statement///0005771 // multivesicular body // inferred from direct assay///0016020 // membrane // inferred from electronic anno…	0005509 // calcium ion binding // inferred from direct assay///0005515 // protein binding // inferred from physical interaction///0008134 // transcription factor binding // inferred from electronic annotation///0044822 // poly(A) RNA binding // inferred from direct assay	chr13:45911311-45915295 (-) // 83.98 // q14.13
212869_x_at	TPT1	7178	0006816 // calcium ion transport // inferred by curator///0006874 // cellular calcium ion homeostasis // inferred by curator///0009615 // response to virus // inferred from expression pattern///0019827 // stem cell population maintenance // inferred from electronic annotation///0042981 // regulation of apoptotic process // non-traceable author statement///0043066 // negative regulation of apoptot…	0005615 // extracellular space // inferred from direct assay///0005634 // nucleus // inferred from direct assay///0005654 // nucleoplasm // inferred from electronic annotation///0005737 // cytoplasm // inferred from direct assay///0005737 // cytoplasm // traceable author statement///0005771 // multivesicular body // inferred from direct assay///0016020 // membrane // inferred from electronic anno…	0005509 // calcium ion binding // inferred from direct assay///0005515 // protein binding // inferred from physical interaction///0008134 // transcription factor binding // inferred from electronic annotation///0044822 // poly(A) RNA binding // inferred from direct assay	chr13:45911006-45914158 (-) // 91.37 // q14.13
214327_x_at	TPT1	7178	0006816 // calcium ion transport // inferred by curator///0006874 // cellular calcium ion homeostasis // inferred by curator///0009615 // response to virus // inferred from expression pattern///0042981 // regulation of apoptotic process // non-traceable author statement///0043066 // negative regulation of apoptotic process // traceable author statement///1902230 // negative regulation of intrinsi…	0005615 // extracellular space // inferred from direct assay///0005634 // nucleus // inferred from direct assay///0005737 // cytoplasm // inferred from direct assay///0005737 // cytoplasm // traceable author statement///0005771 // multivesicular body // inferred from direct assay///0045298 // tubulin complex // inferred from direct assay///0070062 // extracellular exosome // inferred from direct …	0005509 // calcium ion binding // inferred from direct assay///0005515 // protein binding // inferred from physical interaction///0044822 // poly(A) RNA binding // inferred from direct assay	chr13:45911312-45913013 (-) // 90.89 // q14.13
216520_s_at	TPT1	7178	0006816 // calcium ion transport // inferred by curator///0006874 // cellular calcium ion homeostasis // inferred by curator///0009615 // response to virus // inferred from expression pattern///0019827 // stem cell population maintenance // inferred from electronic annotation///0042981 // regulation of apoptotic process // non-traceable author statement///0043066 // negative regulation of apoptot…	0005615 // extracellular space // inferred from direct assay///0005634 // nucleus // inferred from direct assay///0005654 // nucleoplasm // inferred from electronic annotation///0005737 // cytoplasm // inferred from direct assay///0005737 // cytoplasm // traceable author statement///0005771 // multivesicular body // inferred from direct assay///0045298 // tubulin complex // inferred from direct a…	0005509 // calcium ion binding // inferred from direct assay///0005515 // protein binding // inferred from physical interaction///0008134 // transcription factor binding // inferred from electronic annotation///0044822 // poly(A) RNA binding // inferred from direct assay	chr13:45914162-45915204 (-) // 74.49 // q14.13
202546_at	VAMP8	8673	0006461 // protein complex assembly // inferred from electronic annotation///0006810 // transport // inferred from electronic annotation///0006892 // post-Golgi vesicle-mediated transport // traceable author statement///0006906 // vesicle fusion // not recorded///0006914 // autophagy // inferred from electronic annotation///0015031 // protein transport // inferred from electronic annotation///001…	0005737 // cytoplasm // inferred from direct assay///0005739 // mitochondrion // inferred from electronic annotation///0005764 // lysosome // inferred from electronic annotation///0005765 // lysosomal membrane // inferred from direct assay///0005768 // endosome // inferred from electronic annotation///0005769 // early endosome // traceable author statement///0005829 // cytosol // inferred from di…	0000149 // SNARE binding // not recorded///0005484 // SNAP receptor activity // not recorded///0005515 // protein binding // inferred from physical interaction///0019869 // chloride channel inhibitor activity // inferred from direct assay///0019905 // syntaxin binding // inferred from electronic annotation	chr2:85806130-85808898 (+) // 90.59 // p11.2
203683_s_at	VEGFB	7423	0001525 // angiogenesis // inferred from electronic annotation///0001938 // positive regulation of endothelial cell proliferation // inferred from direct assay///0002576 // platelet degranulation // traceable author statement///0006493 // protein O-linked glycosylation // inferred from electronic annotation///0007507 // heart development // inferred from electronic annotation///0007596 // blood c…	0005576 // extracellular region // traceable author statement///0005615 // extracellular space // inferred from direct assay///0005622 // intracellular // inferred from electronic annotation///0016020 // membrane // inferred from electronic annotation///0031093 // platelet alpha granule lumen // traceable author statement	0005515 // protein binding // inferred from physical interaction///0008083 // growth factor activity // inferred from electronic annotation///0008201 // heparin binding // inferred from electronic annotation///0042056 // chemoattractant activity // inferred from direct assay///0042803 // protein homodimerization activity // inferred from electronic annotation///0043183 // vascular endothelial gro…	chr11:64002301-64005926 (+) // 98.94 // q13.1
221725_at	WASF2	10163	0001505 // regulation of neurotransmitter levels // inferred from electronic annotation///0001525 // angiogenesis // inferred from electronic annotation///0001667 // ameboidal-type cell migration // inferred from electronic annotation///0006897 // endocytosis // inferred from electronic annotation///0007186 // G-protein coupled receptor signaling pathway // inferred from electronic annotation///0…	0001726 // ruffle // inferred from electronic annotation///0005622 // intracellular // inferred from direct assay///0005737 // cytoplasm // inferred from electronic annotation///0005769 // early endosome // inferred from electronic annotation///0005829 // cytosol // traceable author statement///0005856 // cytoskeleton // inferred from electronic annotation///0005911 // cell-cell junction // infer…	0003779 // actin binding // inferred from electronic annotation///0004969 // histamine receptor activity // inferred from electronic annotation///0005515 // protein binding // inferred from physical interaction///0032403 // protein complex binding // inferred from direct assay///0032403 // protein complex binding // inferred from mutant phenotype	chr1:27730733-27816669 (-) // 95.54 // p36.11
200638_s_at	YWHAZ	7534	0002553 // histamine secretion by mast cell // inferred from electronic annotation///0006367 // transcription initiation from RNA polymerase II promoter // traceable author statement///0006605 // protein targeting // inferred from electronic annotation///0006626 // protein targeting to mitochondrion // inferred from electronic annotation///0006915 // apoptotic process // traceable author statemen…	0005615 // extracellular space // inferred from direct assay///0005634 // nucleus // inferred from direct assay///0005654 // nucleoplasm // traceable author statement///0005737 // cytoplasm // traceable author statement///0005739 // mitochondrion // inferred from electronic annotation///0005829 // cytosol // traceable author statement///0005925 // focal adhesion // inferred from direct assay///00…	0004497 // monooxygenase activity // inferred from electronic annotation///0005515 // protein binding // inferred from physical interaction///0008134 // transcription factor binding // inferred from physical interaction///0016301 // kinase activity // inferred from electronic annotation///0019901 // protein kinase binding // inferred from physical interaction///0019904 // protein domain specific …	chr8:101931921-101964250 (-) // 80.03 // q22.3
200639_s_at	YWHAZ	7534	0002553 // histamine secretion by mast cell // inferred from electronic annotation///0006367 // transcription initiation from RNA polymerase II promoter // traceable author statement///0006605 // protein targeting // inferred from electronic annotation///0006626 // protein targeting to mitochondrion // inferred from electronic annotation///0006915 // apoptotic process // traceable author statemen…	0005615 // extracellular space // inferred from direct assay///0005634 // nucleus // inferred from direct assay///0005654 // nucleoplasm // traceable author statement///0005737 // cytoplasm // traceable author statement///0005739 // mitochondrion // inferred from electronic annotation///0005829 // cytosol // traceable author statement///0005925 // focal adhesion // inferred from direct assay///00…	0004497 // monooxygenase activity // inferred from electronic annotation///0005515 // protein binding // inferred from physical interaction///0008134 // transcription factor binding // inferred from physical interaction///0016301 // kinase activity // inferred from electronic annotation///0019901 // protein kinase binding // inferred from physical interaction///0019904 // protein domain specific …	chr8:101930913-101965569 (-) // 84.83 // q22.3
200640_at	YWHAZ	7534	0002553 // histamine secretion by mast cell // inferred from electronic annotation///0006367 // transcription initiation from RNA polymerase II promoter // traceable author statement///0006605 // protein targeting // inferred from electronic annotation///0006626 // protein targeting to mitochondrion // inferred from electronic annotation///0006915 // apoptotic process // traceable author statemen…	0005615 // extracellular space // inferred from direct assay///0005634 // nucleus // inferred from direct assay///0005654 // nucleoplasm // traceable author statement///0005737 // cytoplasm // traceable author statement///0005739 // mitochondrion // inferred from electronic annotation///0005829 // cytosol // traceable author statement///0005925 // focal adhesion // inferred from direct assay///00…	0004497 // monooxygenase activity // inferred from electronic annotation///0005515 // protein binding // inferred from physical interaction///0008134 // transcription factor binding // inferred from physical interaction///0016301 // kinase activity // inferred from electronic annotation///0019901 // protein kinase binding // inferred from physical interaction///0019904 // protein domain specific …	chr8:101930913-101965569 (-) // 84.83 // q22.3
200641_s_at	YWHAZ	7534	0002553 // histamine secretion by mast cell // inferred from electronic annotation///0006367 // transcription initiation from RNA polymerase II promoter // traceable author statement///0006605 // protein targeting // inferred from electronic annotation///0006626 // protein targeting to mitochondrion // inferred from electronic annotation///0006915 // apoptotic process // traceable author statemen…	0005615 // extracellular space // inferred from direct assay///0005634 // nucleus // inferred from direct assay///0005654 // nucleoplasm // traceable author statement///0005737 // cytoplasm // traceable author statement///0005739 // mitochondrion // inferred from electronic annotation///0005829 // cytosol // traceable author statement///0005925 // focal adhesion // inferred from direct assay///00…	0004497 // monooxygenase activity // inferred from electronic annotation///0005515 // protein binding // inferred from physical interaction///0008134 // transcription factor binding // inferred from physical interaction///0016301 // kinase activity // inferred from electronic annotation///0019901 // protein kinase binding // inferred from physical interaction///0019904 // protein domain specific …	chr8:101932754-101964271 (-) // 97.57 // q22.3
219314_s_at	ZNF219	51222	0000122 // negative regulation of transcription from RNA polymerase II promoter // inferred from direct assay///0001505 // regulation of neurotransmitter levels // inferred from electronic annotation///0006351 // transcription, DNA-templated // inferred from direct assay///0006355 // regulation of transcription, DNA-templated // inferred from mutant phenotype///0007165 // signal transduction // n…	0005634 // nucleus // inferred from direct assay///0016021 // integral component of membrane // inferred from electronic annotation	0000978 // RNA polymerase II core promoter proximal region sequence-specific DNA binding // inferred from direct assay///0001078 // transcriptional repressor activity, RNA polymerase II core promoter proximal region sequence-specific binding // inferred from direct assay///0003676 // nucleic acid binding // inferred from electronic annotation///0003677 // DNA binding // inferred from direct assay…	chr14:21558235-21566799 (-) // 89.57 // q11.2
219540_at	ZNF267	10308	0006351 // transcription, DNA-templated // inferred from electronic annotation///0006355 // regulation of transcription, DNA-templated // not recorded///0007275 // multicellular organismal development // traceable author statement	0005622 // intracellular // inferred from electronic annotation///0005634 // nucleus // inferred from electronic annotation	0003676 // nucleic acid binding // inferred from electronic annotation///0003677 // DNA binding // inferred from electronic annotation///0003700 // transcription factor activity, sequence-specific DNA binding // not recorded///0046872 // metal ion binding // inferred from electronic annotation	chr16:31885118-31928676 (+) // 99.6 // p11.2
216735_x_at						chr3:11297535-11298938 (+) // 36.06 // p25.3
