# Supplementary material for: Histaminergic System and Inflammation-Related Genes in Normal Large Intestine and Adenocarcinoma Tissues: Transcriptional Profiles and Relations
Source: Int J Mol Sci. 2023 Mar 3;24(5):4913. doi: 10.3390/ijms24054913 (PMC10002554; doi:10.3390/ijms24054913)
Supplement: Supplementary file 1 [file ijms-24-04913-s001.zip › Table S2. Inflammation entities list.xlsx]

## Sheet: Table S2. Inflammation entities
Probe Set ID	Gene Symbol	Entrez Gene	Gene Ontology Biological Process	Gene Ontology Cellular Component	Gene Ontology Molecular Function	Alignments
200602_at	APP	351	0001878 // response to yeast // inferred from mutant phenotype///0001967 // suckling behavior // inferred from electronic annotation///0002576 // platelet degranulation // traceable author statement///0006378 // mRNA polyadenylation // inferred from sequence or structural similarity///0006417 // regulation of translation // inferred from sequence or structural similarity///0006468 // protein phos…	0005576 // extracellular region // traceable author statement///0005615 // extracellular space // inferred from direct assay///0005641 // nuclear envelope lumen // inferred from direct assay///0005737 // cytoplasm // inferred from direct assay///0005737 // cytoplasm // inferred from sequence or structural similarity///0005768 // endosome // inferred from direct assay///0005790 // smooth endoplasm…	0003677 // DNA binding // inferred from sequence or structural similarity///0004867 // serine-type endopeptidase inhibitor activity // inferred from direct assay///0005102 // receptor binding // inferred from physical interaction///0005515 // protein binding // inferred from physical interaction///0008201 // heparin binding // inferred from electronic annotation///0008233 // peptidase activity //…	chr21:27252861-27543085 (-) // 95.14 // q21.3
200784_s_at	LRP1	4035	0001523 // retinoid metabolic process // traceable author statement///0006897 // endocytosis // inferred from electronic annotation///0006898 // receptor-mediated endocytosis // traceable author statement///0007205 // protein kinase C-activating G-protein coupled receptor signaling pathway // inferred from electronic annotation///0007275 // multicellular organismal development // inferred from el…	0005634 // nucleus // inferred from electronic annotation///0005730 // nucleolus // inferred from direct assay///0005737 // cytoplasm // inferred from direct assay///0005765 // lysosomal membrane // inferred from direct assay///0005768 // endosome // inferred from electronic annotation///0005886 // plasma membrane // traceable author statement///0005887 // integral component of plasma membrane //…	0002020 // protease binding // inferred from electronic annotation///0004872 // receptor activity // traceable author statement///0005509 // calcium ion binding // inferred from sequence or structural similarity///0005515 // protein binding // inferred from physical interaction///0032403 // protein complex binding // inferred from direct assay///0034185 // apolipoprotein binding // inferred from …	chr12:57522281-57607174 (+) // 98.1 // q13.3
200785_s_at	LRP1	4035	0001523 // retinoid metabolic process // traceable author statement///0006897 // endocytosis // inferred from electronic annotation///0006898 // receptor-mediated endocytosis // traceable author statement///0007205 // protein kinase C-activating G-protein coupled receptor signaling pathway // inferred from electronic annotation///0007275 // multicellular organismal development // inferred from el…	0005634 // nucleus // inferred from electronic annotation///0005730 // nucleolus // inferred from direct assay///0005737 // cytoplasm // inferred from direct assay///0005765 // lysosomal membrane // inferred from direct assay///0005768 // endosome // inferred from electronic annotation///0005886 // plasma membrane // traceable author statement///0005887 // integral component of plasma membrane //…	0002020 // protease binding // inferred from electronic annotation///0004872 // receptor activity // traceable author statement///0005509 // calcium ion binding // inferred from sequence or structural similarity///0005515 // protein binding // inferred from physical interaction///0032403 // protein complex binding // inferred from direct assay///0034185 // apolipoprotein binding // inferred from …	chr12:57522281-57607123 (+) // 99.9 // q13.3
200989_at	HIF1A	3091	0001525 // angiogenesis // inferred from electronic annotation///0001568 // blood vessel development // inferred from electronic annotation///0001666 // response to hypoxia // inferred from direct assay///0001666 // response to hypoxia // inferred from mutant phenotype///0001755 // neural crest cell migration // inferred from electronic annotation///0001837 // epithelial to mesenchymal transition…	0005634 // nucleus // inferred from direct assay///0005654 // nucleoplasm // traceable author statement///0005667 // transcription factor complex // inferred from physical interaction///0005730 // nucleolus // inferred from direct assay///0005737 // cytoplasm // inferred from direct assay///0005829 // cytosol // inferred from direct assay///0005829 // cytosol // traceable author statement///00166…	0000981 // RNA polymerase II transcription factor activity, sequence-specific DNA binding // inferred from electronic annotation///0000989 // transcription factor activity, transcription factor binding // inferred from direct assay///0001076 // transcription factor activity, RNA polymerase II transcription factor binding // inferred from electronic annotation///0001077 // transcriptional activato…	chr14:62162272-62214970 (+) // 99.08 // q23.2
201012_at	ANXA1	301	0000733 // DNA strand renaturation // inferred from electronic annotation///0001780 // neutrophil homeostasis // inferred from mutant phenotype///0002250 // adaptive immune response // inferred from electronic annotation///0002376 // immune system process // inferred from electronic annotation///0002548 // monocyte chemotaxis // inferred from direct assay///0002685 // regulation of leukocyte migr…	0001533 // cornified envelope // inferred from direct assay///0001891 // phagocytic cup // inferred from electronic annotation///0005576 // extracellular region // traceable author statement///0005615 // extracellular space // inferred from direct assay///0005634 // nucleus // inferred from direct assay///0005654 // nucleoplasm // inferred from direct assay///0005737 // cytoplasm // inferred from…	0003697 // single-stranded DNA binding // inferred from electronic annotation///0003727 // single-stranded RNA binding // inferred from electronic annotation///0004386 // helicase activity // inferred from electronic annotation///0004859 // phospholipase inhibitor activity // inferred from electronic annotation///0005102 // receptor binding // traceable author statement///0005198 // structural mo…	chr9:75766780-75785307 (+) // 99.93 // q21.13
201087_at	PXN	5829	0000187 // activation of MAPK activity // inferred from electronic annotation///0006936 // muscle contraction // traceable author statement///0007010 // cytoskeleton organization // inferred from electronic annotation///0007155 // cell adhesion // non-traceable author statement///0007160 // cell-matrix adhesion // inferred from electronic annotation///0007165 // signal transduction // traceable a…	0001725 // stress fiber // inferred from direct assay///0005654 // nucleoplasm // inferred from direct assay///0005737 // cytoplasm // inferred from direct assay///0005829 // cytosol // traceable author statement///0005856 // cytoskeleton // inferred from electronic annotation///0005875 // microtubule associated complex // traceable author statement///0005886 // plasma membrane // inferred from d…	0005178 // integrin binding // inferred from electronic annotation///0005515 // protein binding // inferred from physical interaction///0008013 // beta-catenin binding // inferred from physical interaction///0008270 // zinc ion binding // inferred from electronic annotation///0017166 // vinculin binding // inferred from physical interaction///0019901 // protein kinase binding // inferred from ele…	chr12:120648256-120703509 (-) // 99.25 // q24.23
201200_at	CREG1	8804	0006355 // regulation of transcription, DNA-templated // inferred from electronic annotation///0006357 // regulation of transcription from RNA polymerase II promoter // traceable author statement///0007275 // multicellular organismal development // traceable author statement///0008283 // cell proliferation // traceable author statement///0040008 // regulation of growth // inferred from electronic…	0005576 // extracellular region // inferred from electronic annotation///0005615 // extracellular space // inferred from direct assay///0005667 // transcription factor complex // inferred from electronic annotation///0070062 // extracellular exosome // inferred from direct assay	0003714 // transcription corepressor activity // traceable author statement///0008134 // transcription factor binding // inferred from electronic annotation///0010181 // FMN binding // inferred from electronic annotation///0016491 // oxidoreductase activity // inferred from electronic annotation	chr1:167510256-167523004 (-) // 96.83 // q24.2
201367_s_at	ZFP36L2	678	0000288 // nuclear-transcribed mRNA catabolic process, deadenylation-dependent decay // inferred from electronic annotation///0006355 // regulation of transcription, DNA-templated // traceable author statement///0006402 // mRNA catabolic process // inferred from sequence or structural similarity///0008283 // cell proliferation // traceable author statement///0030097 // hemopoiesis // inferred fro…	0005634 // nucleus // inferred from sequence or structural similarity///0005737 // cytoplasm // inferred from sequence or structural similarity	0003677 // DNA binding // inferred from electronic annotation///0003700 // transcription factor activity, sequence-specific DNA binding // traceable author statement///0003723 // RNA binding // inferred from electronic annotation///0017091 // AU-rich element binding // inferred from direct assay///0035925 // mRNA 3'-UTR AU-rich region binding // inferred from electronic annotation///0044822 // po…	chr2:43449544-43453745 (-) // 90.57 // p21
201368_at	ZFP36L2	678	0000288 // nuclear-transcribed mRNA catabolic process, deadenylation-dependent decay // inferred from electronic annotation///0006355 // regulation of transcription, DNA-templated // traceable author statement///0006402 // mRNA catabolic process // inferred from sequence or structural similarity///0008283 // cell proliferation // traceable author statement///0030097 // hemopoiesis // inferred fro…	0005634 // nucleus // inferred from sequence or structural similarity///0005737 // cytoplasm // inferred from sequence or structural similarity	0003677 // DNA binding // inferred from electronic annotation///0003700 // transcription factor activity, sequence-specific DNA binding // traceable author statement///0003723 // RNA binding // inferred from electronic annotation///0017091 // AU-rich element binding // inferred from direct assay///0035925 // mRNA 3'-UTR AU-rich region binding // inferred from electronic annotation///0044822 // po…	chr2:43449544-43453745 (-) // 90.57 // p21
201369_s_at	ZFP36L2	678	0000288 // nuclear-transcribed mRNA catabolic process, deadenylation-dependent decay // inferred from electronic annotation///0006355 // regulation of transcription, DNA-templated // traceable author statement///0006402 // mRNA catabolic process // inferred from sequence or structural similarity///0008283 // cell proliferation // traceable author statement///0030097 // hemopoiesis // inferred fro…	0005634 // nucleus // inferred from sequence or structural similarity///0005737 // cytoplasm // inferred from sequence or structural similarity	0003677 // DNA binding // inferred from electronic annotation///0003700 // transcription factor activity, sequence-specific DNA binding // traceable author statement///0003723 // RNA binding // inferred from electronic annotation///0017091 // AU-rich element binding // inferred from direct assay///0035925 // mRNA 3'-UTR AU-rich region binding // inferred from electronic annotation///0044822 // po…	chr2:43451373-43453518 (-) // 85.02 // p21
201464_x_at	JUN	3725	0001525 // angiogenesis // inferred from electronic annotation///0001774 // microglial cell activation // inferred from electronic annotation///0001836 // release of cytochrome c from mitochondria // inferred from electronic annotation///0001889 // liver development // inferred from electronic annotation///0001938 // positive regulation of endothelial cell proliferation // inferred from electroni…	0000228 // nuclear chromosome // traceable author statement///0000790 // nuclear chromatin // inferred from electronic annotation///0005634 // nucleus // inferred from direct assay///0005654 // nucleoplasm // inferred from direct assay///0005654 // nucleoplasm // traceable author statement///0005667 // transcription factor complex // not recorded///0005719 // nuclear euchromatin // inferred from …	0000978 // RNA polymerase II core promoter proximal region sequence-specific DNA binding // not recorded///0000980 // RNA polymerase II distal enhancer sequence-specific DNA binding // inferred from direct assay///0000981 // RNA polymerase II transcription factor activity, sequence-specific DNA binding // inferred by curator///0001077 // transcriptional activator activity, RNA polymerase II core …	chr1:59246365-59249733 (-) // 98.8 // p32.1
201465_s_at	JUN	3725	0001525 // angiogenesis // inferred from electronic annotation///0001774 // microglial cell activation // inferred from electronic annotation///0001836 // release of cytochrome c from mitochondria // inferred from electronic annotation///0001889 // liver development // inferred from electronic annotation///0001938 // positive regulation of endothelial cell proliferation // inferred from electroni…	0000228 // nuclear chromosome // traceable author statement///0000790 // nuclear chromatin // inferred from electronic annotation///0005634 // nucleus // inferred from direct assay///0005654 // nucleoplasm // inferred from direct assay///0005654 // nucleoplasm // traceable author statement///0005667 // transcription factor complex // not recorded///0005719 // nuclear euchromatin // inferred from …	0000978 // RNA polymerase II core promoter proximal region sequence-specific DNA binding // not recorded///0000980 // RNA polymerase II distal enhancer sequence-specific DNA binding // inferred from direct assay///0000981 // RNA polymerase II transcription factor activity, sequence-specific DNA binding // inferred by curator///0001077 // transcriptional activator activity, RNA polymerase II core …	chr1:59247716-59249688 (-) // 98.5 // p32.1
201466_s_at	JUN	3725	0001525 // angiogenesis // inferred from electronic annotation///0001774 // microglial cell activation // inferred from electronic annotation///0001836 // release of cytochrome c from mitochondria // inferred from electronic annotation///0001889 // liver development // inferred from electronic annotation///0001938 // positive regulation of endothelial cell proliferation // inferred from electroni…	0000228 // nuclear chromosome // traceable author statement///0000790 // nuclear chromatin // inferred from electronic annotation///0005634 // nucleus // inferred from direct assay///0005654 // nucleoplasm // inferred from direct assay///0005654 // nucleoplasm // traceable author statement///0005667 // transcription factor complex // not recorded///0005719 // nuclear euchromatin // inferred from …	0000978 // RNA polymerase II core promoter proximal region sequence-specific DNA binding // not recorded///0000980 // RNA polymerase II distal enhancer sequence-specific DNA binding // inferred from direct assay///0000981 // RNA polymerase II transcription factor activity, sequence-specific DNA binding // inferred by curator///0001077 // transcriptional activator activity, RNA polymerase II core …	chr1:59246461-59249715 (-) // 99.05 // p32.1
201494_at	PRCP	5547	0002155 // regulation of thyroid hormone mediated signaling pathway // inferred from electronic annotation///0002353 // plasma kallikrein-kinin cascade // inferred from electronic annotation///0003085 // negative regulation of systemic arterial blood pressure // not recorded///0006508 // proteolysis // not recorded///0007596 // blood coagulation // traceable author statement///0007597 // blood co…	0005764 // lysosome // inferred from electronic annotation///0005886 // plasma membrane // traceable author statement///0045178 // basal part of cell // inferred from electronic annotation///0070062 // extracellular exosome // inferred from direct assay	0004180 // carboxypeptidase activity // inferred from electronic annotation///0004185 // serine-type carboxypeptidase activity // traceable author statement///0005515 // protein binding // inferred from physical interaction///0008233 // peptidase activity // inferred from electronic annotation///0008236 // serine-type peptidase activity // inferred from electronic annotation///0008239 // dipeptid…	chr11:82535409-82611473 (-) // 99.61 // q14.1
201502_s_at	NFKBIA	4792	0000060 // protein import into nucleus, translocation // inferred from electronic annotation///0002223 // stimulatory C-type lectin receptor signaling pathway // traceable author statement///0002224 // toll-like receptor signaling pathway // traceable author statement///0002755 // MyD88-dependent toll-like receptor signaling pathway // traceable author statement///0002756 // MyD88-independent tol…	0005634 // nucleus // inferred from direct assay///0005737 // cytoplasm // inferred from direct assay///0005829 // cytosol // traceable author statement///0005886 // plasma membrane // inferred from direct assay///0033256 // I-kappaB/NF-kappaB complex // traceable author statement///0043234 // protein complex // inferred from electronic annotation	0005515 // protein binding // inferred from physical interaction///0008134 // transcription factor binding // traceable author statement///0008139 // nuclear localization sequence binding // inferred from physical interaction///0019899 // enzyme binding // inferred from physical interaction///0031072 // heat shock protein binding // inferred from electronic annotation///0031625 // ubiquitin prote…	chr14:35870715-35874135 (-) // 87.8 // q13.2
201587_s_at	IRAK1	3654	0000187 // activation of MAPK activity // traceable author statement///0001959 // regulation of cytokine-mediated signaling pathway // inferred from mutant phenotype///0002224 // toll-like receptor signaling pathway // traceable author statement///0002376 // immune system process // inferred from electronic annotation///0002755 // MyD88-dependent toll-like receptor signaling pathway // traceable …	0005622 // intracellular // ---///0005634 // nucleus // inferred from direct assay///0005737 // cytoplasm // inferred from direct assay///0005811 // lipid particle // inferred from sequence or structural similarity///0005829 // cytosol // traceable author statement///0005886 // plasma membrane // not recorded///0005886 // plasma membrane // traceable author statement///0010008 // endosome membran…	0000166 // nucleotide binding // inferred from electronic annotation///0004672 // protein kinase activity // inferred from direct assay///0004672 // protein kinase activity // traceable author statement///0004674 // protein serine/threonine kinase activity // not recorded///0004674 // protein serine/threonine kinase activity // non-traceable author statement///0004704 // NF-kappaB-inducing kinase…	chrX:153275961-153285342 (-) // 87.8 // q28
201701_s_at	PGRMC2	10424	0043401 // steroid hormone mediated signaling pathway // traceable author statement	0012505 // endomembrane system // not recorded///0016020 // membrane // inferred from direct assay///0016021 // integral component of membrane // inferred from electronic annotation	0003707 // steroid hormone receptor activity // traceable author statement///0005496 // steroid binding // inferred from electronic annotation///0008289 // lipid binding // inferred from electronic annotation///0020037 // heme binding // not recorded	chr4:129191298-129208948 (-) // 88.63 // q28.2
201743_at	CD14	929	0002224 // toll-like receptor signaling pathway // traceable author statement///0002237 // response to molecule of bacterial origin // inferred from electronic annotation///0002376 // immune system process // inferred from electronic annotation///0002755 // MyD88-dependent toll-like receptor signaling pathway // traceable author statement///0002756 // MyD88-independent toll-like receptor signalin…	0005576 // extracellular region // traceable author statement///0005615 // extracellular space // inferred from direct assay///0005794 // Golgi apparatus // inferred from direct assay///0005886 // plasma membrane // traceable author statement///0009897 // external side of plasma membrane // inferred from electronic annotation///0009986 // cell surface // inferred from electronic annotation///0010…	0001530 // lipopolysaccharide binding // inferred from direct assay///0001847 // opsonin receptor activity // traceable author statement///0005515 // protein binding // inferred from physical interaction///0016019 // peptidoglycan receptor activity // traceable author statement///0070891 // lipoteichoic acid binding // inferred from direct assay	chr5:140011320-140012772 (-) // 99.34 // q31.3
201786_s_at	ADAR	103	0001649 // osteoblast differentiation // inferred from electronic annotation///0001701 // in utero embryonic development // inferred from electronic annotation///0002244 // hematopoietic progenitor cell differentiation // inferred from electronic annotation///0002376 // immune system process // inferred from electronic annotation///0002566 // somatic diversification of immune receptors via somati…	0005634 // nucleus // inferred from direct assay///0005634 // nucleus // traceable author statement///0005654 // nucleoplasm // inferred from direct assay///0005654 // nucleoplasm // traceable author statement///0005730 // nucleolus // inferred from direct assay///0005737 // cytoplasm // inferred from direct assay///0005737 // cytoplasm // traceable author statement///0016020 // membrane // infer…	0003677 // DNA binding // inferred from electronic annotation///0003723 // RNA binding // inferred from electronic annotation///0003726 // double-stranded RNA adenosine deaminase activity // inferred from direct assay///0003726 // double-stranded RNA adenosine deaminase activity // non-traceable author statement///0004000 // adenosine deaminase activity // inferred from electronic annotation///00…	chr1:154554539-154580669 (-) // 99.64 // q21.3
201792_at	AEBP1	165	0000122 // negative regulation of transcription from RNA polymerase II promoter // inferred from mutant phenotype///0001501 // skeletal system development // traceable author statement///0006351 // transcription, DNA-templated // inferred from electronic annotation///0006355 // regulation of transcription, DNA-templated // inferred from electronic annotation///0006508 // proteolysis // inferred f…	0005576 // extracellular region // inferred from electronic annotation///0005615 // extracellular space // inferred from direct assay///0005634 // nucleus // inferred from electronic annotation///0005737 // cytoplasm // inferred from electronic annotation///0031012 // extracellular matrix // inferred from direct assay///0070062 // extracellular exosome // inferred from direct assay	0000977 // RNA polymerase II regulatory region sequence-specific DNA binding // inferred from direct assay///0001227 // transcriptional repressor activity, RNA polymerase II transcription regulatory region sequence-specific binding // inferred from direct assay///0001227 // transcriptional repressor activity, RNA polymerase II transcription regulatory region sequence-specific binding // inferred …	chr7:44144125-44154158 (+) // 94.84 // p13
201882_x_at	B4GALT1	2683	0002064 // epithelial cell development // inferred from electronic annotation///0002526 // acute inflammatory response // inferred from electronic annotation///0005975 // carbohydrate metabolic process // traceable author statement///0005989 // lactose biosynthetic process // traceable author statement///0006012 // galactose metabolic process // inferred from electronic annotation///0006486 // pr…	0000138 // Golgi trans cisterna // inferred from direct assay///0000139 // Golgi membrane // traceable author statement///0005576 // extracellular region // inferred from electronic annotation///0005615 // extracellular space // inferred from direct assay///0005794 // Golgi apparatus // inferred from direct assay///0005886 // plasma membrane // traceable author statement///0009897 // external sid…	0003831 // beta-N-acetylglucosaminylglycopeptide beta-1,4-galactosyltransferase activity // inferred from direct assay///0003945 // N-acetyllactosamine synthase activity // inferred from direct assay///0004461 // lactose synthase activity // not recorded///0004461 // lactose synthase activity // inferred from direct assay///0005515 // protein binding // inferred from electronic annotation///00080…	chr9:33110639-33167243 (-) // 94.31 // p21.1
201883_s_at	B4GALT1	2683	0002064 // epithelial cell development // inferred from electronic annotation///0002526 // acute inflammatory response // inferred from electronic annotation///0005975 // carbohydrate metabolic process // traceable author statement///0005989 // lactose biosynthetic process // traceable author statement///0006012 // galactose metabolic process // inferred from electronic annotation///0006486 // pr…	0000138 // Golgi trans cisterna // inferred from direct assay///0000139 // Golgi membrane // traceable author statement///0005576 // extracellular region // inferred from electronic annotation///0005615 // extracellular space // inferred from direct assay///0005794 // Golgi apparatus // inferred from direct assay///0005886 // plasma membrane // traceable author statement///0009897 // external sid…	0003831 // beta-N-acetylglucosaminylglycopeptide beta-1,4-galactosyltransferase activity // inferred from direct assay///0003945 // N-acetyllactosamine synthase activity // inferred from direct assay///0004461 // lactose synthase activity // not recorded///0004461 // lactose synthase activity // inferred from direct assay///0005515 // protein binding // inferred from electronic annotation///00080…	chr9:33110641-33167243 (-) // 97.62 // p21.1
201887_at	IL13RA1	3597	0002639 // positive regulation of immunoglobulin production // inferred from electronic annotation///0007166 // cell surface receptor signaling pathway // traceable author statement///0019221 // cytokine-mediated signaling pathway // inferred from electronic annotation///0030890 // positive regulation of B cell proliferation // inferred from electronic annotation///0035772 // interleukin-13-media…	0005886 // plasma membrane // traceable author statement///0005898 // interleukin-13 receptor complex // traceable author statement///0016020 // membrane // inferred from electronic annotation///0016021 // integral component of membrane // inferred from electronic annotation	0004896 // cytokine receptor activity // inferred from electronic annotation///0005515 // protein binding // inferred from physical interaction///0016515 // interleukin-13 receptor activity // inferred from electronic annotation	chrX:117861558-117928496 (+) // 90.81 // q24
201888_s_at	IL13RA1	3597	0002639 // positive regulation of immunoglobulin production // inferred from electronic annotation///0007166 // cell surface receptor signaling pathway // traceable author statement///0019221 // cytokine-mediated signaling pathway // inferred from electronic annotation///0030890 // positive regulation of B cell proliferation // inferred from electronic annotation///0035772 // interleukin-13-media…	0005886 // plasma membrane // traceable author statement///0005898 // interleukin-13 receptor complex // traceable author statement///0016020 // membrane // inferred from electronic annotation///0016021 // integral component of membrane // inferred from electronic annotation	0004896 // cytokine receptor activity // inferred from electronic annotation///0005515 // protein binding // inferred from physical interaction///0016515 // interleukin-13 receptor activity // inferred from electronic annotation	chrX:117861564-117926198 (+) // 98.13 // q24
201985_at	KIAA0196	9897	0001556 // oocyte maturation // inferred from electronic annotation///0006810 // transport // inferred from electronic annotation///0015031 // protein transport // inferred from electronic annotation///0016197 // endosomal transport // inferred from electronic annotation///0040038 // polar body extrusion after meiotic divisions // inferred from electronic annotation///0090306 // spindle assembly …	0005737 // cytoplasm // inferred from electronic annotation///0005768 // endosome // inferred from electronic annotation///0005769 // early endosome // inferred from direct assay///0005783 // endoplasmic reticulum // inferred from electronic annotation///0005829 // cytosol // inferred from electronic annotation///0071203 // WASH complex // inferred from direct assay	0005515 // protein binding // inferred from physical interaction	chr8:126036508-126104005 (-) // 99.93 // q24.13
202162_s_at	CNOT8	9337	0000288 // nuclear-transcribed mRNA catabolic process, deadenylation-dependent decay // traceable author statement///0000289 // nuclear-transcribed mRNA poly(A) tail shortening // traceable author statement///0006351 // transcription, DNA-templated // inferred from electronic annotation///0006355 // regulation of transcription, DNA-templated // non-traceable author statement///0006417 // regulati…	0005622 // intracellular // inferred from direct assay///0005634 // nucleus // non-traceable author statement///0005737 // cytoplasm // inferred from electronic annotation///0005829 // cytosol // traceable author statement///0030014 // CCR4-NOT complex // inferred from direct assay	0000175 // 3'-5'-exoribonuclease activity // inferred from direct assay///0003676 // nucleic acid binding // inferred from electronic annotation///0003700 // transcription factor activity, sequence-specific DNA binding // non-traceable author statement///0003723 // RNA binding // inferred from electronic annotation///0004518 // nuclease activity // inferred from electronic annotation///0004527 //…	chr5:154238196-154256352 (+) // 92.72 // q33.2
202163_s_at	CNOT8	9337	0000288 // nuclear-transcribed mRNA catabolic process, deadenylation-dependent decay // traceable author statement///0000289 // nuclear-transcribed mRNA poly(A) tail shortening // traceable author statement///0006351 // transcription, DNA-templated // inferred from electronic annotation///0006355 // regulation of transcription, DNA-templated // non-traceable author statement///0006417 // regulati…	0005622 // intracellular // inferred from direct assay///0005634 // nucleus // non-traceable author statement///0005737 // cytoplasm // inferred from electronic annotation///0005829 // cytosol // traceable author statement///0030014 // CCR4-NOT complex // inferred from direct assay	0000175 // 3'-5'-exoribonuclease activity // inferred from direct assay///0003676 // nucleic acid binding // inferred from electronic annotation///0003700 // transcription factor activity, sequence-specific DNA binding // non-traceable author statement///0003723 // RNA binding // inferred from electronic annotation///0004518 // nuclease activity // inferred from electronic annotation///0004527 //…	chr5:154238208-154256341 (+) // 94.7 // q33.2
202164_s_at	CNOT8	9337	0000288 // nuclear-transcribed mRNA catabolic process, deadenylation-dependent decay // traceable author statement///0000289 // nuclear-transcribed mRNA poly(A) tail shortening // traceable author statement///0006351 // transcription, DNA-templated // inferred from electronic annotation///0006355 // regulation of transcription, DNA-templated // non-traceable author statement///0006417 // regulati…	0005622 // intracellular // inferred from direct assay///0005634 // nucleus // non-traceable author statement///0005737 // cytoplasm // inferred from electronic annotation///0005829 // cytosol // traceable author statement///0030014 // CCR4-NOT complex // inferred from direct assay	0000175 // 3'-5'-exoribonuclease activity // inferred from direct assay///0003676 // nucleic acid binding // inferred from electronic annotation///0003700 // transcription factor activity, sequence-specific DNA binding // non-traceable author statement///0003723 // RNA binding // inferred from electronic annotation///0004518 // nuclease activity // inferred from electronic annotation///0004527 //…	chr5:154242766-154255917 (+) // 96.78 // q33.2
202181_at	SUSD6	9766	0006974 // cellular response to DNA damage stimulus // inferred from direct assay///0008219 // cell death // inferred from direct assay	0016020 // membrane // inferred from electronic annotation///0016021 // integral component of membrane // inferred from electronic annotation	0005515 // protein binding // inferred from physical interaction	chr14:70078357-70181854 (+) // 98.5 // q24.1
202206_at	ARL4C	10123	0006810 // transport // inferred from electronic annotation///0006886 // intracellular protein transport // inferred from electronic annotation///0007264 // small GTPase mediated signal transduction // inferred from electronic annotation///0008152 // metabolic process // traceable author statement///0015031 // protein transport // inferred from electronic annotation///0032456 // endocytic recycli…	0005622 // intracellular // inferred from electronic annotation///0005634 // nucleus // traceable author statement///0005737 // cytoplasm // inferred from direct assay///0005886 // plasma membrane // inferred from direct assay///0016020 // membrane // inferred from electronic annotation///0030175 // filopodium // inferred from electronic annotation///0042995 // cell projection // inferred from el…	0000166 // nucleotide binding // inferred from electronic annotation///0003924 // GTPase activity // traceable author statement///0005515 // protein binding // inferred from physical interaction///0005525 // GTP binding // inferred from electronic annotation///0043014 // alpha-tubulin binding // inferred from direct assay	chr2:235401681-235405622 (-) // 95.42 // q37.1
202207_at	ARL4C	10123	0006810 // transport // inferred from electronic annotation///0006886 // intracellular protein transport // inferred from electronic annotation///0007264 // small GTPase mediated signal transduction // inferred from electronic annotation///0008152 // metabolic process // traceable author statement///0015031 // protein transport // inferred from electronic annotation///0032456 // endocytic recycli…	0005622 // intracellular // inferred from electronic annotation///0005634 // nucleus // traceable author statement///0005737 // cytoplasm // inferred from direct assay///0005886 // plasma membrane // inferred from direct assay///0016020 // membrane // inferred from electronic annotation///0030175 // filopodium // inferred from electronic annotation///0042995 // cell projection // inferred from el…	0000166 // nucleotide binding // inferred from electronic annotation///0003924 // GTPase activity // traceable author statement///0005515 // protein binding // inferred from physical interaction///0005525 // GTP binding // inferred from electronic annotation///0043014 // alpha-tubulin binding // inferred from direct assay	chr2:235401681-235405622 (-) // 95.42 // q37.1
202208_s_at	ARL4C	10123	0006810 // transport // inferred from electronic annotation///0006886 // intracellular protein transport // inferred from electronic annotation///0007264 // small GTPase mediated signal transduction // inferred from electronic annotation///0008152 // metabolic process // traceable author statement///0015031 // protein transport // inferred from electronic annotation///0032456 // endocytic recycli…	0005622 // intracellular // inferred from electronic annotation///0005634 // nucleus // traceable author statement///0005737 // cytoplasm // inferred from direct assay///0005886 // plasma membrane // inferred from direct assay///0016020 // membrane // inferred from electronic annotation///0030175 // filopodium // inferred from electronic annotation///0042995 // cell projection // inferred from el…	0000166 // nucleotide binding // inferred from electronic annotation///0003924 // GTPase activity // traceable author statement///0005515 // protein binding // inferred from physical interaction///0005525 // GTP binding // inferred from electronic annotation///0043014 // alpha-tubulin binding // inferred from direct assay	chr2:235403805-235405204 (-) // 94.67 // q37.1
202376_at	SERPINA3	12	0006953 // acute-phase response // inferred from electronic annotation///0006954 // inflammatory response // non-traceable author statement///0010466 // negative regulation of peptidase activity // inferred from electronic annotation///0010951 // negative regulation of endopeptidase activity // not recorded///0019216 // regulation of lipid metabolic process // non-traceable author statement///003…	0005576 // extracellular region // non-traceable author statement///0005615 // extracellular space // inferred from direct assay///0005622 // intracellular // non-traceable author statement///0005634 // nucleus // traceable author statement///0070062 // extracellular exosome // inferred from direct assay///0072562 // blood microparticle // inferred from direct assay	0003677 // DNA binding // traceable author statement///0004867 // serine-type endopeptidase inhibitor activity // traceable author statement///0005515 // protein binding // inferred from physical interaction///0030414 // peptidase inhibitor activity // inferred from electronic annotation	chr14:95080767-95090391 (+) // 98.11 // q32.13
202419_at	KDSR	2531	0006629 // lipid metabolic process // inferred from electronic annotation///0006665 // sphingolipid metabolic process // traceable author statement///0006666 // 3-keto-sphinganine metabolic process // inferred from direct assay///0008152 // metabolic process // inferred from electronic annotation///0030148 // sphingolipid biosynthetic process // traceable author statement///0044281 // small molec…	0005615 // extracellular space // traceable author statement///0005783 // endoplasmic reticulum // inferred from direct assay///0005789 // endoplasmic reticulum membrane // traceable author statement///0016020 // membrane // inferred from direct assay///0016021 // integral component of membrane // inferred from electronic annotation	0016491 // oxidoreductase activity // inferred from electronic annotation///0047560 // 3-dehydrosphinganine reductase activity // inferred from direct assay	chr18:60997832-61034458 (-) // 93.79 // q21.33
202447_at	DECR1	1666	0006629 // lipid metabolic process // inferred from electronic annotation///0006631 // fatty acid metabolic process // inferred from electronic annotation///0006635 // fatty acid beta-oxidation // inferred from direct assay///0006635 // fatty acid beta-oxidation // traceable author statement///0008152 // metabolic process // inferred from electronic annotation///0044255 // cellular lipid metaboli…	0005634 // nucleus // inferred from direct assay///0005654 // nucleoplasm // inferred from direct assay///0005737 // cytoplasm // inferred from direct assay///0005739 // mitochondrion // inferred from direct assay///0005739 // mitochondrion // non-traceable author statement///0005759 // mitochondrial matrix // traceable author statement///0070062 // extracellular exosome // inferred from direct a…	0008670 // 2,4-dienoyl-CoA reductase (NADPH) activity // inferred from direct assay///0016491 // oxidoreductase activity // inferred from electronic annotation///0016651 // oxidoreductase activity, acting on NAD(P)H // traceable author statement///0070402 // NADPH binding // inferred from direct assay	chr8:91013579-91064227 (+) // 98.96 // q21.3
202468_s_at	CTNNAL1	8727	0007155 // cell adhesion // inferred from electronic annotation///0007266 // Rho protein signal transduction // inferred from direct assay	0005622 // intracellular // inferred from electronic annotation///0005737 // cytoplasm // inferred from electronic annotation///0005829 // cytosol // inferred from direct assay///0005856 // cytoskeleton // inferred from electronic annotation///0005886 // plasma membrane // inferred from electronic annotation///0016020 // membrane // inferred from electronic annotation	0005515 // protein binding // inferred from physical interaction///0045296 // cadherin binding // inferred from electronic annotation///0051015 // actin filament binding // inferred from electronic annotation	chr9:111704850-111775764 (-) // 99.96 // q31.3
202500_at	DNAJB2	3300	0006457 // protein folding // traceable author statement///0006986 // response to unfolded protein // traceable author statement///0008285 // negative regulation of cell proliferation // inferred from genetic interaction///0030308 // negative regulation of cell growth // inferred from genetic interaction///0030433 // ER-associated ubiquitin-dependent protein catabolic process // inferred from dir…	0000502 // proteasome complex // inferred from direct assay///0005634 // nucleus // inferred from direct assay///0005829 // cytosol // inferred from direct assay///0016234 // inclusion body // inferred from direct assay	0005515 // protein binding // inferred from physical interaction///0030544 // Hsp70 protein binding // inferred from physical interaction///0031593 // polyubiquitin binding // inferred from direct assay///0051082 // unfolded protein binding // inferred from direct assay///0051087 // chaperone binding // inferred from physical interaction///0070628 // proteasome binding // inferred from direct ass…	chr2:220144530-220151612 (+) // 98.89 // q35
202509_s_at	TNFAIP2	7127	0001525 // angiogenesis // inferred from electronic annotation///0006887 // exocytosis // not recorded///0007275 // multicellular organismal development // inferred from electronic annotation///0030154 // cell differentiation // inferred from electronic annotation///0051601 // exocyst localization // not recorded	0000145 // exocyst // not recorded///0005615 // extracellular space // traceable author statement	0000149 // SNARE binding // not recorded	chr14:103590104-103603773 (+) // 74.52 // q32.32
202510_s_at	TNFAIP2	7127	0001525 // angiogenesis // inferred from electronic annotation///0006887 // exocytosis // not recorded///0007275 // multicellular organismal development // inferred from electronic annotation///0030154 // cell differentiation // inferred from electronic annotation///0051601 // exocyst localization // not recorded	0000145 // exocyst // not recorded///0005615 // extracellular space // traceable author statement	0000149 // SNARE binding // not recorded	chr14:103592663-103603776 (+) // 75.19 // q32.32
202530_at	MAPK14	1432	0000077 // DNA damage checkpoint // inferred from electronic annotation///0000165 // MAPK cascade // inferred from electronic annotation///0000187 // activation of MAPK activity // traceable author statement///0000902 // cell morphogenesis // inferred from electronic annotation///0001502 // cartilage condensation // inferred from electronic annotation///0001525 // angiogenesis // inferred from el…	0000922 // spindle pole // inferred from electronic annotation///0005622 // intracellular // inferred from electronic annotation///0005623 // cell // inferred from electronic annotation///0005634 // nucleus // inferred from sequence or structural similarity///0005654 // nucleoplasm // inferred from direct assay///0005654 // nucleoplasm // traceable author statement///0005737 // cytoplasm // infer…	0000166 // nucleotide binding // inferred from electronic annotation///0004672 // protein kinase activity // inferred from electronic annotation///0004674 // protein serine/threonine kinase activity // traceable author statement///0004707 // MAP kinase activity // inferred from direct assay///0004708 // MAP kinase kinase activity // traceable author statement///0005515 // protein binding // infer…	chr6:35995572-36078535 (+) // 98.64 // p21.31
202607_at	NDST1	3340	0000165 // MAPK cascade // inferred from electronic annotation///0000271 // polysaccharide biosynthetic process // inferred from electronic annotation///0005975 // carbohydrate metabolic process // traceable author statement///0006024 // glycosaminoglycan biosynthetic process // traceable author statement///0006954 // inflammatory response // inferred from electronic annotation///0007224 // smoot…	0000139 // Golgi membrane // traceable author statement///0005794 // Golgi apparatus // inferred from electronic annotation///0016020 // membrane // inferred from electronic annotation///0016021 // integral component of membrane // inferred from electronic annotation	0003824 // catalytic activity // inferred from electronic annotation///0008146 // sulfotransferase activity // inferred from electronic annotation///0015016 // [heparan sulfate]-glucosamine N-sulfotransferase activity // inferred from electronic annotation///0016740 // transferase activity // inferred from electronic annotation///0016787 // hydrolase activity // inferred from electronic annotatio…	chr5:149865893-149937772 (+) // 84.18 // q33.1
202608_s_at	NDST1	3340	0000165 // MAPK cascade // inferred from electronic annotation///0000271 // polysaccharide biosynthetic process // inferred from electronic annotation///0005975 // carbohydrate metabolic process // traceable author statement///0006024 // glycosaminoglycan biosynthetic process // traceable author statement///0006954 // inflammatory response // inferred from electronic annotation///0007224 // smoot…	0000139 // Golgi membrane // traceable author statement///0005794 // Golgi apparatus // inferred from electronic annotation///0016020 // membrane // inferred from electronic annotation///0016021 // integral component of membrane // inferred from electronic annotation	0003824 // catalytic activity // inferred from electronic annotation///0008146 // sulfotransferase activity // inferred from electronic annotation///0015016 // [heparan sulfate]-glucosamine N-sulfotransferase activity // inferred from electronic annotation///0016740 // transferase activity // inferred from electronic annotation///0016787 // hydrolase activity // inferred from electronic annotatio…	chr5:149887753-149933449 (+) // 99.78 // q33.1
202637_s_at	ICAM1	3383	0001541 // ovarian follicle development // inferred from electronic annotation///0001666 // response to hypoxia // inferred from electronic annotation///0001910 // regulation of leukocyte mediated cytotoxicity // traceable author statement///0001975 // response to amphetamine // inferred from electronic annotation///0002291 // T cell activation via T cell receptor contact with antigen bound to MH…	0001772 // immunological synapse // inferred from electronic annotation///0005615 // extracellular space // inferred from direct assay///0005886 // plasma membrane // traceable author statement///0005887 // integral component of plasma membrane // traceable author statement///0005925 // focal adhesion // inferred from direct assay///0009897 // external side of plasma membrane // inferred from ele…	0001618 // virus receptor activity // inferred from electronic annotation///0004872 // receptor activity // traceable author statement///0004888 // transmembrane signaling receptor activity // traceable author statement///0005178 // integrin binding // inferred from direct assay///0005178 // integrin binding // inferred from physical interaction///0005515 // protein binding // inferred from physi…	chr19:10381763-10397290 (+) // 83.34 // p13.2
202638_s_at	ICAM1	3383	0001541 // ovarian follicle development // inferred from electronic annotation///0001666 // response to hypoxia // inferred from electronic annotation///0001910 // regulation of leukocyte mediated cytotoxicity // traceable author statement///0001975 // response to amphetamine // inferred from electronic annotation///0002291 // T cell activation via T cell receptor contact with antigen bound to MH…	0001772 // immunological synapse // inferred from electronic annotation///0005615 // extracellular space // inferred from direct assay///0005886 // plasma membrane // traceable author statement///0005887 // integral component of plasma membrane // traceable author statement///0005925 // focal adhesion // inferred from direct assay///0009897 // external side of plasma membrane // inferred from ele…	0001618 // virus receptor activity // inferred from electronic annotation///0004872 // receptor activity // traceable author statement///0004888 // transmembrane signaling receptor activity // traceable author statement///0005178 // integrin binding // inferred from direct assay///0005178 // integrin binding // inferred from physical interaction///0005515 // protein binding // inferred from physi…	chr19:10381778-10397291 (+) // 87.81 // p13.2
202643_s_at	TNFAIP3	7128	0001922 // B-1 B cell homeostasis // inferred from sequence or structural similarity///0002237 // response to molecule of bacterial origin // inferred from direct assay///0002634 // regulation of germinal center formation // inferred from sequence or structural similarity///0002677 // negative regulation of chronic inflammatory response // inferred from electronic annotation///0006508 // proteoly…	0005634 // nucleus // inferred from direct assay///0005737 // cytoplasm // inferred from direct assay///0005737 // cytoplasm // inferred from electronic annotation///0005764 // lysosome // inferred from electronic annotation///0005813 // centrosome // inferred from direct assay///0005829 // cytosol // traceable author statement///0070062 // extracellular exosome // inferred from direct assay	0002020 // protease binding // inferred from physical interaction///0003677 // DNA binding // inferred from electronic annotation///0003824 // catalytic activity // inferred from electronic annotation///0004842 // ubiquitin-protein transferase activity // inferred from direct assay///0004843 // ubiquitin-specific protease activity // inferred from direct assay///0004843 // ubiquitin-specific prot…	chr6:138188458-138204449 (+) // 98.33 // q23.3
202644_s_at	TNFAIP3	7128	0001922 // B-1 B cell homeostasis // inferred from sequence or structural similarity///0002237 // response to molecule of bacterial origin // inferred from direct assay///0002634 // regulation of germinal center formation // inferred from sequence or structural similarity///0002677 // negative regulation of chronic inflammatory response // inferred from electronic annotation///0006508 // proteoly…	0005634 // nucleus // inferred from direct assay///0005737 // cytoplasm // inferred from direct assay///0005737 // cytoplasm // inferred from electronic annotation///0005764 // lysosome // inferred from electronic annotation///0005813 // centrosome // inferred from direct assay///0005829 // cytosol // traceable author statement///0070062 // extracellular exosome // inferred from direct assay	0002020 // protease binding // inferred from physical interaction///0003677 // DNA binding // inferred from electronic annotation///0003824 // catalytic activity // inferred from electronic annotation///0004842 // ubiquitin-protein transferase activity // inferred from direct assay///0004843 // ubiquitin-specific protease activity // inferred from direct assay///0004843 // ubiquitin-specific prot…	chr6:138188580-138204442 (+) // 99.55 // q23.3
202698_x_at	COX4I1	1327	0006091 // generation of precursor metabolites and energy // traceable author statement///0006123 // mitochondrial electron transport, cytochrome c to oxygen // not recorded///0006367 // transcription initiation from RNA polymerase II promoter // traceable author statement///0007584 // response to nutrient // inferred from electronic annotation///0009060 // aerobic respiration // not recorded///0…	0005634 // nucleus // inferred from direct assay///0005739 // mitochondrion // inferred from direct assay///0005743 // mitochondrial inner membrane // traceable author statement///0005751 // mitochondrial respiratory chain complex IV // not recorded///0016020 // membrane // inferred from direct assay///0016021 // integral component of membrane // inferred from electronic annotation///0031966 // m…	0004129 // cytochrome-c oxidase activity // inferred from electronic annotation///0005515 // protein binding // inferred from physical interaction	chr16:85833195-85840605 (+) // 99.87 // q24.1
202709_at	FMOD	2331	0005975 // carbohydrate metabolic process // traceable author statement///0007181 // transforming growth factor beta receptor complex assembly // traceable author statement///0018146 // keratan sulfate biosynthetic process // traceable author statement///0030198 // extracellular matrix organization // traceable author statement///0030203 // glycosaminoglycan metabolic process // traceable author …	0005576 // extracellular region // traceable author statement///0005578 // proteinaceous extracellular matrix // inferred from electronic annotation///0005615 // extracellular space // inferred from direct assay///0005796 // Golgi lumen // traceable author statement///0031012 // extracellular matrix // inferred from direct assay///0043202 // lysosomal lumen // traceable author statement	0005515 // protein binding // inferred from electronic annotation///0008201 // heparin binding // not recorded///0048495 // Roundabout binding // not recorded	chr1:203309756-203317403 (-) // 98.95 // q32.1
202727_s_at	IFNGR1	3459	0007165 // signal transduction // traceable author statement///0009615 // response to virus // traceable author statement///0019221 // cytokine-mediated signaling pathway // not recorded///0019221 // cytokine-mediated signaling pathway // traceable author statement///0060333 // interferon-gamma-mediated signaling pathway // traceable author statement///0060334 // regulation of interferon-gamma-me…	0005783 // endoplasmic reticulum // inferred from electronic annotation///0005886 // plasma membrane // not recorded///0005886 // plasma membrane // traceable author statement///0005887 // integral component of plasma membrane // traceable author statement///0014069 // postsynaptic density // inferred from electronic annotation///0016020 // membrane // inferred from electronic annotation///001602…	0004906 // interferon-gamma receptor activity // traceable author statement///0005515 // protein binding // inferred from physical interaction///0019955 // cytokine binding // inferred from electronic annotation	chr6:137518621-137540507 (-) // 99.85 // q23.3
202728_s_at	LTBP1	4052	0007178 // transmembrane receptor protein serine/threonine kinase signaling pathway // non-traceable author statement///0030198 // extracellular matrix organization // traceable author statement///0035583 // sequestering of TGFbeta in extracellular matrix // traceable author statement	0001527 // microfibril // inferred from direct assay///0005576 // extracellular region // traceable author statement///0005578 // proteinaceous extracellular matrix // non-traceable author statement///0031012 // extracellular matrix // inferred from direct assay///0043234 // protein complex // inferred from direct assay	0005024 // transforming growth factor beta-activated receptor activity // non-traceable author statement///0005509 // calcium ion binding // inferred from electronic annotation///0005515 // protein binding // inferred from physical interaction///0019838 // growth factor binding // inferred from electronic annotation///0050431 // transforming growth factor beta binding // inferred from physical in…	chr2:33359729-33624572 (+) // 98.18 // p22.3
202729_s_at	LTBP1	4052	0007178 // transmembrane receptor protein serine/threonine kinase signaling pathway // non-traceable author statement///0030198 // extracellular matrix organization // traceable author statement///0035583 // sequestering of TGFbeta in extracellular matrix // traceable author statement	0001527 // microfibril // inferred from direct assay///0005576 // extracellular region // traceable author statement///0005578 // proteinaceous extracellular matrix // non-traceable author statement///0031012 // extracellular matrix // inferred from direct assay///0043234 // protein complex // inferred from direct assay	0005024 // transforming growth factor beta-activated receptor activity // non-traceable author statement///0005509 // calcium ion binding // inferred from electronic annotation///0005515 // protein binding // inferred from physical interaction///0019838 // growth factor binding // inferred from electronic annotation///0050431 // transforming growth factor beta binding // inferred from physical in…	chr2:33359729-33624410 (+) // 98.6 // p22.3
202786_at	STK39	27347	0001933 // negative regulation of protein phosphorylation // inferred from electronic annotation///0006468 // protein phosphorylation // non-traceable author statement///0006950 // response to stress // non-traceable author statement///0007346 // regulation of mitotic cell cycle // not recorded///0008217 // regulation of blood pressure // inferred from electronic annotation///0016310 // phosphory…	0005634 // nucleus // non-traceable author statement///0005737 // cytoplasm // not recorded///0005737 // cytoplasm // non-traceable author statement///0005856 // cytoskeleton // inferred from electronic annotation///0016020 // membrane // inferred from electronic annotation///0016323 // basolateral plasma membrane // inferred from electronic annotation///0016324 // apical plasma membrane // infer…	0000166 // nucleotide binding // inferred from electronic annotation///0004672 // protein kinase activity // inferred from electronic annotation///0004674 // protein serine/threonine kinase activity // inferred from direct assay///0004702 // receptor signaling protein serine/threonine kinase activity // non-traceable author statement///0005515 // protein binding // inferred from physical interact…	chr2:168810530-169104105 (-) // 94.99 // q24.3
202793_at	LPCAT3	10162	0006629 // lipid metabolic process // inferred from electronic annotation///0006644 // phospholipid metabolic process // traceable author statement///0008152 // metabolic process // inferred from electronic annotation///0008654 // phospholipid biosynthetic process // inferred from electronic annotation///0036150 // phosphatidylserine acyl-chain remodeling // traceable author statement///0036151 /…	0005783 // endoplasmic reticulum // inferred from electronic annotation///0005789 // endoplasmic reticulum membrane // traceable author statement///0016020 // membrane // inferred from direct assay///0016021 // integral component of membrane // inferred from electronic annotation	0016740 // transferase activity // inferred from electronic annotation///0016746 // transferase activity, transferring acyl groups // inferred from electronic annotation///0016747 // transferase activity, transferring acyl groups other than amino-acyl groups // inferred from electronic annotation///0047184 // 1-acylglycerophosphocholine O-acyltransferase activity // inferred from mutant phenotype	chr12:7085485-7092663 (-) // 84.43 // p13.31
202859_x_at	CXCL8	3576	0001525 // angiogenesis // traceable author statement///0002237 // response to molecule of bacterial origin // inferred from direct assay///0006928 // movement of cell or subcellular component // traceable author statement///0006935 // chemotaxis // traceable author statement///0006954 // inflammatory response // traceable author statement///0006955 // immune response // not recorded///0007050 //…	0005576 // extracellular region // traceable author statement///0005615 // extracellular space // inferred from electronic annotation///0005622 // intracellular // inferred from direct assay///0005622 // intracellular // traceable author statement	0005125 // cytokine activity // inferred from electronic annotation///0005153 // interleukin-8 receptor binding // inferred from physical interaction///0005515 // protein binding // inferred from physical interaction///0008009 // chemokine activity // traceable author statement	chr4:74606301-74609431 (+) // 70.71 // q13.3
202912_at	ADM	133	0001570 // vasculogenesis // inferred from direct assay///0001666 // response to hypoxia // inferred from electronic annotation///0001843 // neural tube closure // inferred from electronic annotation///0001878 // response to yeast // inferred from direct assay///0002026 // regulation of the force of heart contraction // inferred from electronic annotation///0002031 // G-protein coupled receptor i…	0005576 // extracellular region // traceable author statement///0005615 // extracellular space // inferred from direct assay///0005737 // cytoplasm // inferred from direct assay///0005829 // cytosol // inferred from electronic annotation	0005102 // receptor binding // traceable author statement///0005179 // hormone activity // inferred from electronic annotation///0005515 // protein binding // inferred from physical interaction///0031700 // adrenomedullin receptor binding // inferred from electronic annotation	chr11:10326641-10328923 (+) // 97.1 // p15.4
202961_s_at	ATP5J2	9551	0006754 // ATP biosynthetic process // inferred from electronic annotation///0006810 // transport // inferred from electronic annotation///0006811 // ion transport // inferred from electronic annotation///0015992 // proton transport // non-traceable author statement///0022904 // respiratory electron transport chain // traceable author statement///0042776 // mitochondrial ATP synthesis coupled pro…	0000276 // mitochondrial proton-transporting ATP synthase complex, coupling factor F(o) // inferred from electronic annotation///0005634 // nucleus // inferred from direct assay///0005739 // mitochondrion // inferred from electronic annotation///0005743 // mitochondrial inner membrane // traceable author statement///0005753 // mitochondrial proton-transporting ATP synthase complex // inferred fro…	0016887 // ATPase activity // inferred from direct assay///0022857 // transmembrane transporter activity // inferred by curator	chr7:99055818-99063790 (-) // 97.79 // q22.1
202962_at	KIF13B	23303	0006605 // protein targeting // traceable author statement///0007018 // microtubule-based movement // not recorded///0007018 // microtubule-based movement // traceable author statement///0007165 // signal transduction // non-traceable author statement///0008152 // metabolic process // inferred from electronic annotation///0042110 // T cell activation // non-traceable author statement///0050770 //…	0005737 // cytoplasm // inferred from direct assay///0005856 // cytoskeleton // inferred from electronic annotation///0005871 // kinesin complex // not recorded///0005874 // microtubule // inferred from electronic annotation///0030424 // axon // inferred from direct assay///0042995 // cell projection // inferred from electronic annotation	0000166 // nucleotide binding // inferred from electronic annotation///0003777 // microtubule motor activity // not recorded///0003777 // microtubule motor activity // non-traceable author statement///0005515 // protein binding // inferred from physical interaction///0005524 // ATP binding // inferred from electronic annotation///0008017 // microtubule binding // inferred from electronic annotati…	chr8:28924795-29120588 (-) // 99.13 // p12
202987_at	TRAF3IP2	10758	0001783 // B cell apoptotic process // inferred from electronic annotation///0002230 // positive regulation of defense response to virus by host // inferred from direct assay///0006959 // humoral immune response // inferred from electronic annotation///0035556 // intracellular signal transduction // non-traceable author statement///0043123 // positive regulation of I-kappaB kinase/NF-kappaB signa…	0005622 // intracellular // non-traceable author statement///0005623 // cell // inferred from electronic annotation	0005515 // protein binding // inferred from physical interaction	chr6:111877460-111927449 (-) // 74.7 // q21
203233_at	IL4R	3566	0002376 // immune system process // inferred from electronic annotation///0002532 // production of molecular mediator involved in inflammatory response // inferred from electronic annotation///0002639 // positive regulation of immunoglobulin production // inferred from electronic annotation///0006955 // immune response // traceable author statement///0007165 // signal transduction // traceable au…	0005576 // extracellular region // inferred from electronic annotation///0005615 // extracellular space // inferred from electronic annotation///0005622 // intracellular // traceable author statement///0005886 // plasma membrane // inferred from electronic annotation///0005887 // integral component of plasma membrane // traceable author statement///0016020 // membrane // inferred from electronic …	0004896 // cytokine receptor activity // inferred from electronic annotation///0004913 // interleukin-4 receptor activity // traceable author statement///0005057 // receptor signaling protein activity // traceable author statement///0005515 // protein binding // inferred from physical interaction	chr16:27351108-27376095 (+) // 95.66 // p12.1
203271_s_at	UNC119	9094	0006810 // transport // inferred from electronic annotation///0006897 // endocytosis // inferred from electronic annotation///0007268 // synaptic transmission // traceable author statement///0007601 // visual perception // inferred from electronic annotation///0007602 // phototransduction // traceable author statement///0015031 // protein transport // inferred from electronic annotation///0042953…	0000922 // spindle pole // inferred from direct assay///0005737 // cytoplasm // inferred from electronic annotation///0005813 // centrosome // inferred from direct assay///0005815 // microtubule organizing center // inferred from electronic annotation///0005819 // spindle // inferred from electronic annotation///0005829 // cytosol // traceable author statement///0005856 // cytoskeleton // inferre…	0005515 // protein binding // inferred from physical interaction///0008289 // lipid binding // inferred from direct assay	chr17:26873724-26879629 (-) // 98.91 // q11.2
203304_at	BAMBI	25805	0007179 // transforming growth factor beta receptor signaling pathway // traceable author statement///0008284 // positive regulation of cell proliferation // inferred from mutant phenotype///0008360 // regulation of cell shape // inferred from mutant phenotype///0010718 // positive regulation of epithelial to mesenchymal transition // inferred from mutant phenotype///0016477 // cell migration // …	0005737 // cytoplasm // inferred from direct assay///0005886 // plasma membrane // inferred from direct assay///0005886 // plasma membrane // traceable author statement///0016020 // membrane // inferred from electronic annotation///0016021 // integral component of membrane // inferred from electronic annotation	0005109 // frizzled binding // inferred from physical interaction///0005114 // type II transforming growth factor beta receptor binding // traceable author statement	chr10:28966452-28971696 (+) // 97.7 // p12.1
203450_at	CBY1	25776	0008104 // protein localization // inferred from mutant phenotype///0030154 // cell differentiation // inferred from electronic annotation///0030178 // negative regulation of Wnt signaling pathway // inferred from direct assay///0042384 // cilium assembly // inferred from electronic annotation///0045444 // fat cell differentiation // inferred from sequence or structural similarity///0045892 // ne…	0005634 // nucleus // inferred from direct assay///0005654 // nucleoplasm // traceable author statement///0005794 // Golgi apparatus // inferred from electronic annotation///0005802 // trans-Golgi network // inferred from direct assay///0005829 // cytosol // traceable author statement///0016607 // nuclear speck // inferred from electronic annotation///0036064 // ciliary basal body // inferred fro…	0005515 // protein binding // inferred from physical interaction///0008013 // beta-catenin binding // inferred from direct assay///0008013 // beta-catenin binding // inferred from physical interaction///0042802 // identical protein binding // inferred from physical interaction	chr22:39052678-39069856 (+) // 100.0 // q13.1
203555_at	PTPN18	26469	0006470 // protein dephosphorylation // traceable author statement///0016311 // dephosphorylation // inferred from electronic annotation///0035335 // peptidyl-tyrosine dephosphorylation // inferred from electronic annotation///0035335 // peptidyl-tyrosine dephosphorylation // traceable author statement	0005634 // nucleus // inferred from electronic annotation///0005737 // cytoplasm // inferred from electronic annotation	0004721 // phosphoprotein phosphatase activity // inferred from electronic annotation///0004725 // protein tyrosine phosphatase activity // inferred from electronic annotation///0004726 // non-membrane spanning protein tyrosine phosphatase activity // inferred from electronic annotation///0005515 // protein binding // inferred from physical interaction///0016787 // hydrolase activity // inferred …	chr2:131113651-131132143 (+) // 83.35 // q21.1
203641_s_at	COBLL1	22837	0030041 // actin filament polymerization // not recorded///0051639 // actin filament network formation // not recorded	0070062 // extracellular exosome // inferred from direct assay	0003779 // actin binding // inferred from electronic annotation///0003785 // actin monomer binding // not recorded	chr2:165540970-165697922 (-) // 98.64 // q24.3
203642_s_at	COBLL1	22837	0007155 // cell adhesion // inferred from electronic annotation///0030041 // actin filament polymerization // not recorded///0051639 // actin filament network formation // not recorded	0005576 // extracellular region // inferred from electronic annotation///0005578 // proteinaceous extracellular matrix // inferred from electronic annotation///0005604 // basement membrane // inferred from electronic annotation///0070062 // extracellular exosome // inferred from direct assay	0003779 // actin binding // inferred from electronic annotation///0003785 // actin monomer binding // not recorded	chr2:165541338-165697922 (-) // 99.36 // q24.3
203666_at	CXCL12	6387	0001569 // patterning of blood vessels // inferred from electronic annotation///0001666 // response to hypoxia // inferred from electronic annotation///0001667 // ameboidal-type cell migration // inferred from electronic annotation///0001764 // neuron migration // inferred from electronic annotation///0001938 // positive regulation of endothelial cell proliferation // inferred from electronic ann…	0005576 // extracellular region // traceable author statement///0005615 // extracellular space // inferred from electronic annotation///0005886 // plasma membrane // inferred from electronic annotation///0009897 // external side of plasma membrane // not recorded///0070062 // extracellular exosome // inferred from direct assay	0005102 // receptor binding // traceable author statement///0005125 // cytokine activity // inferred from electronic annotation///0008009 // chemokine activity // inferred from direct assay///0008009 // chemokine activity // traceable author statement///0008083 // growth factor activity // inferred from electronic annotation///0042056 // chemoattractant activity // not recorded///0042379 // chemo…	chr10:44865613-44880525 (-) // 97.66 // q11.21
203845_at	KAT2B	8850	0006325 // chromatin organization // traceable author statement///0006338 // chromatin remodeling // inferred from direct assay///0006338 // chromatin remodeling // non-traceable author statement///0006351 // transcription, DNA-templated // inferred from electronic annotation///0006355 // regulation of transcription, DNA-templated // inferred from electronic annotation///0006360 // transcription …	0000123 // histone acetyltransferase complex // inferred from electronic annotation///0000125 // PCAF complex // non-traceable author statement///0000776 // kinetochore // inferred from electronic annotation///0000790 // nuclear chromatin // inferred from electronic annotation///0005634 // nucleus // inferred from sequence or structural similarity///0005654 // nucleoplasm // traceable author stat…	0000977 // RNA polymerase II regulatory region sequence-specific DNA binding // inferred from electronic annotation///0003682 // chromatin binding // inferred from electronic annotation///0003712 // transcription cofactor activity // inferred from physical interaction///0003713 // transcription coactivator activity // inferred from direct assay///0004402 // histone acetyltransferase activity // i…	chr3:20081523-20195896 (+) // 91.18 // p24.3
203936_s_at	MMP9	4318	0001501 // skeletal system development // inferred from electronic annotation///0001503 // ossification // inferred from electronic annotation///0001934 // positive regulation of protein phosphorylation // inferred from mutant phenotype///0006508 // proteolysis // inferred from direct assay///0007411 // axon guidance // traceable author statement///0007566 // embryo implantation // inferred from …	0005576 // extracellular region // traceable author statement///0005578 // proteinaceous extracellular matrix // inferred from electronic annotation///0005615 // extracellular space // inferred from direct assay///0031012 // extracellular matrix // inferred from electronic annotation///0070062 // extracellular exosome // inferred from direct assay	0004175 // endopeptidase activity // inferred from direct assay///0004222 // metalloendopeptidase activity // inferred from direct assay///0005509 // calcium ion binding // inferred from electronic annotation///0005515 // protein binding // inferred from physical interaction///0005518 // collagen binding // traceable author statement///0008233 // peptidase activity // inferred from electronic ann…	chr20:44637546-44645199 (+) // 97.17 // q13.12
204084_s_at	CLN5	1203	0006465 // signal peptide processing // inferred from direct assay///0007040 // lysosome organization // inferred from electronic annotation///0007042 // lysosomal lumen acidification // inferred from mutant phenotype///0007420 // brain development // inferred from expression pattern///0007601 // visual perception // inferred from electronic annotation///0022008 // neurogenesis // inferred from e…	0005764 // lysosome // inferred from direct assay///0005765 // lysosomal membrane // inferred from direct assay///0005775 // vacuolar lumen // inferred from electronic annotation///0005783 // endoplasmic reticulum // inferred from direct assay///0005794 // Golgi apparatus // inferred from direct assay///0016021 // integral component of membrane // inferred from direct assay///0016021 // integral …	0005515 // protein binding // inferred from physical interaction///0005537 // mannose binding // inferred from direct assay	chr13:77564794-77576651 (+) // 86.05 // q22.3
204085_s_at	CLN5	1203	0006465 // signal peptide processing // inferred from direct assay///0007040 // lysosome organization // inferred from electronic annotation///0007042 // lysosomal lumen acidification // inferred from mutant phenotype///0007420 // brain development // inferred from expression pattern///0007601 // visual perception // inferred from electronic annotation///0022008 // neurogenesis // inferred from e…	0005764 // lysosome // inferred from direct assay///0005765 // lysosomal membrane // inferred from direct assay///0005775 // vacuolar lumen // inferred from electronic annotation///0005783 // endoplasmic reticulum // inferred from direct assay///0005794 // Golgi apparatus // inferred from direct assay///0016021 // integral component of membrane // inferred from direct assay///0016021 // integral …	0005515 // protein binding // inferred from physical interaction///0005537 // mannose binding // inferred from direct assay	chr13:77564794-77576651 (+) // 86.32 // q22.3
204154_at	CDO1	1036	0000096 // sulfur amino acid metabolic process // traceable author statement///0000097 // sulfur amino acid biosynthetic process // traceable author statement///0000098 // sulfur amino acid catabolic process // traceable author statement///0006534 // cysteine metabolic process // traceable author statement///0006954 // inflammatory response // traceable author statement///0007595 // lactation // …	0005829 // cytosol // traceable author statement	0005506 // iron ion binding // inferred from electronic annotation///0008198 // ferrous iron binding // inferred from electronic annotation///0016491 // oxidoreductase activity // inferred from electronic annotation///0017172 // cysteine dioxygenase activity // inferred from sequence or structural similarity///0017172 // cysteine dioxygenase activity // traceable author statement///0046872 // met…	chr5:115140431-115152342 (-) // 99.36 // q22.3
204158_s_at	TCIRG1	10312	0006810 // transport // inferred from electronic annotation///0006811 // ion transport // inferred from electronic annotation///0006879 // cellular iron ion homeostasis // traceable author statement///0006968 // cellular defense response // traceable author statement///0007035 // vacuolar acidification // not recorded///0008284 // positive regulation of cell proliferation // traceable author stat…	0000220 // vacuolar proton-transporting V-type ATPase, V0 domain // inferred from electronic annotation///0005739 // mitochondrion // inferred from electronic annotation///0005765 // lysosomal membrane // inferred from direct assay///0005886 // plasma membrane // traceable author statement///0005887 // integral component of plasma membrane // traceable author statement///0010008 // endosome membr…	0005215 // transporter activity // traceable author statement///0015078 // hydrogen ion transmembrane transporter activity // inferred from electronic annotation///0046961 // proton-transporting ATPase activity, rotational mechanism // not recorded///0051117 // ATPase binding // not recorded	chr11:67806529-67818361 (+) // 98.53 // q13.2
204207_s_at	RNGTT	8732	0006366 // transcription from RNA polymerase II promoter // traceable author statement///0006370 // 7-methylguanosine mRNA capping // inferred from direct assay///0006370 // 7-methylguanosine mRNA capping // traceable author statement///0006396 // RNA processing // inferred from direct assay///0006397 // mRNA processing // inferred from electronic annotation///0006470 // protein dephosphorylation…	0005634 // nucleus // traceable author statement///0005654 // nucleoplasm // traceable author statement	0000166 // nucleotide binding // inferred from electronic annotation///0003824 // catalytic activity // inferred from electronic annotation///0004484 // mRNA guanylyltransferase activity // inferred from direct assay///0004651 // polynucleotide 5'-phosphatase activity // traceable author statement///0004725 // protein tyrosine phosphatase activity // inferred from electronic annotation///0005525 …	chr6:89321641-89673280 (-) // 99.88 // q15
204208_at	RNGTT	8732	0006366 // transcription from RNA polymerase II promoter // traceable author statement///0006370 // 7-methylguanosine mRNA capping // inferred from direct assay///0006370 // 7-methylguanosine mRNA capping // traceable author statement///0006396 // RNA processing // inferred from direct assay///0006397 // mRNA processing // inferred from electronic annotation///0006470 // protein dephosphorylation…	0005634 // nucleus // traceable author statement///0005654 // nucleoplasm // traceable author statement	0000166 // nucleotide binding // inferred from electronic annotation///0003824 // catalytic activity // inferred from electronic annotation///0004484 // mRNA guanylyltransferase activity // inferred from direct assay///0004651 // polynucleotide 5'-phosphatase activity // traceable author statement///0004725 // protein tyrosine phosphatase activity // inferred from electronic annotation///0005525 …	chr6:89319998-89673304 (-) // 89.29 // q15
204253_s_at	VDR	7421	0000122 // negative regulation of transcription from RNA polymerase II promoter // inferred from direct assay///0000902 // cell morphogenesis // inferred from mutant phenotype///0001501 // skeletal system development // inferred from electronic annotation///0006351 // transcription, DNA-templated // inferred from electronic annotation///0006355 // regulation of transcription, DNA-templated // inf…	0005634 // nucleus // inferred from direct assay///0005654 // nucleoplasm // inferred from direct assay///0005654 // nucleoplasm // traceable author statement///0043235 // receptor complex // inferred from direct assay///0090575 // RNA polymerase II transcription factor complex // inferred from direct assay	0003677 // DNA binding // inferred from direct assay///0003700 // transcription factor activity, sequence-specific DNA binding // inferred from direct assay///0003707 // steroid hormone receptor activity // inferred from electronic annotation///0004879 // RNA polymerase II transcription factor activity, ligand-activated sequence-specific DNA binding // inferred from electronic annotation///000551…	chr12:48235319-48293743 (-) // 81.0 // q13.11
204254_s_at	VDR	7421	0000122 // negative regulation of transcription from RNA polymerase II promoter // inferred from direct assay///0000902 // cell morphogenesis // inferred from mutant phenotype///0001501 // skeletal system development // inferred from electronic annotation///0006351 // transcription, DNA-templated // inferred from electronic annotation///0006355 // regulation of transcription, DNA-templated // inf…	0005634 // nucleus // inferred from direct assay///0005654 // nucleoplasm // inferred from direct assay///0005654 // nucleoplasm // traceable author statement///0043235 // receptor complex // inferred from direct assay///0090575 // RNA polymerase II transcription factor complex // inferred from direct assay	0003677 // DNA binding // inferred from direct assay///0003700 // transcription factor activity, sequence-specific DNA binding // inferred from direct assay///0003707 // steroid hormone receptor activity // inferred from electronic annotation///0004879 // RNA polymerase II transcription factor activity, ligand-activated sequence-specific DNA binding // inferred from electronic annotation///000551…	chr12:48235321-48298769 (-) // 83.73 // q13.11
204255_s_at	VDR	7421	0000122 // negative regulation of transcription from RNA polymerase II promoter // inferred from direct assay///0000902 // cell morphogenesis // inferred from mutant phenotype///0001501 // skeletal system development // inferred from electronic annotation///0006351 // transcription, DNA-templated // inferred from electronic annotation///0006355 // regulation of transcription, DNA-templated // inf…	0005634 // nucleus // inferred from direct assay///0005654 // nucleoplasm // inferred from direct assay///0005654 // nucleoplasm // traceable author statement///0043235 // receptor complex // inferred from direct assay///0090575 // RNA polymerase II transcription factor complex // inferred from direct assay	0003677 // DNA binding // inferred from direct assay///0003700 // transcription factor activity, sequence-specific DNA binding // inferred from direct assay///0003707 // steroid hormone receptor activity // inferred from electronic annotation///0004879 // RNA polymerase II transcription factor activity, ligand-activated sequence-specific DNA binding // inferred from electronic annotation///000551…	chr12:48235319-48293743 (-) // 81.0 // q13.11
204257_at	FADS3	3995	0006629 // lipid metabolic process // inferred from electronic annotation///0006631 // fatty acid metabolic process // inferred from electronic annotation///0006633 // fatty acid biosynthetic process // inferred from electronic annotation///0006636 // unsaturated fatty acid biosynthetic process // non-traceable author statement///0055114 // oxidation-reduction process // inferred from electronic …	0005783 // endoplasmic reticulum // inferred from electronic annotation///0005789 // endoplasmic reticulum membrane // inferred from electronic annotation///0016020 // membrane // non-traceable author statement///0016021 // integral component of membrane // inferred from electronic annotation	0016491 // oxidoreductase activity // inferred from electronic annotation	chr11:61640998-61658986 (-) // 92.83 // q12.2
204369_at	PIK3CA	5290	0001525 // angiogenesis // inferred from electronic annotation///0001889 // liver development // inferred from electronic annotation///0001944 // vasculature development // traceable author statement///0002250 // adaptive immune response // ---///0006006 // glucose metabolic process // inferred from electronic annotation///0006468 // protein phosphorylation // inferred from electronic annotation/…	0005622 // intracellular // inferred from electronic annotation///0005737 // cytoplasm // ---///0005829 // cytosol // traceable author statement///0005886 // plasma membrane // not recorded///0005942 // phosphatidylinositol 3-kinase complex // inferred from sequence or structural similarity///0005943 // phosphatidylinositol 3-kinase complex, class IA // inferred from direct assay///0030027 // lam…	0000166 // nucleotide binding // inferred from electronic annotation///0004674 // protein serine/threonine kinase activity // inferred from electronic annotation///0005488 // binding // inferred from electronic annotation///0005515 // protein binding // inferred from physical interaction///0005524 // ATP binding // inferred from electronic annotation///0016301 // kinase activity // traceable auth…	chr3:178916601-178952355 (+) // 97.81 // q26.32
204382_at	NAT9	26151	0006474 // N-terminal protein amino acid acetylation // not recorded///0008152 // metabolic process // inferred from electronic annotation	0043234 // protein complex // inferred from direct assay	0005515 // protein binding // inferred from physical interaction///0008080 // N-acetyltransferase activity // not recorded///0016740 // transferase activity // inferred from electronic annotation///0016746 // transferase activity, transferring acyl groups // inferred from electronic annotation	chr17:72766687-72772436 (-) // 95.07 // q25.1
204417_at	GALC	2581	0005975 // carbohydrate metabolic process // inferred from electronic annotation///0006629 // lipid metabolic process // inferred from electronic annotation///0006665 // sphingolipid metabolic process // traceable author statement///0006683 // galactosylceramide catabolic process // inferred from sequence or structural similarity///0006687 // glycosphingolipid metabolic process // traceable autho…	0005739 // mitochondrion // inferred from electronic annotation///0005764 // lysosome // traceable author statement///0043202 // lysosomal lumen // traceable author statement///0070062 // extracellular exosome // inferred from direct assay	0004336 // galactosylceramidase activity // inferred from sequence or structural similarity///0016787 // hydrolase activity // inferred from electronic annotation///0016798 // hydrolase activity, acting on glycosyl bonds // inferred from electronic annotation	chr14:88399359-88459843 (-) // 88.41 // q31.3
204421_s_at	FGF2	2247	0000165 // MAPK cascade // traceable author statement///0000186 // activation of MAPKK activity // traceable author statement///0000187 // activation of MAPK activity // traceable author statement///0001525 // angiogenesis // inferred from electronic annotation///0001658 // branching involved in ureteric bud morphogenesis // inferred from direct assay///0001759 // organ induction // inferred from…	0005576 // extracellular region // traceable author statement///0005615 // extracellular space // traceable author statement///0005634 // nucleus // inferred from electronic annotation///0005737 // cytoplasm // inferred from electronic annotation///0005739 // mitochondrion // inferred from electronic annotation///0005829 // cytosol // inferred from electronic annotation	0005102 // receptor binding // inferred from electronic annotation///0005104 // fibroblast growth factor receptor binding // inferred from physical interaction///0005125 // cytokine activity // inferred from direct assay///0005515 // protein binding // inferred from physical interaction///0008083 // growth factor activity // inferred from direct assay///0008201 // heparin binding // inferred from…	chr4:123747985-123816619 (+) // 87.08 // q27
204422_s_at	FGF2	2247	0000165 // MAPK cascade // traceable author statement///0000186 // activation of MAPKK activity // traceable author statement///0000187 // activation of MAPK activity // traceable author statement///0001525 // angiogenesis // inferred from electronic annotation///0001658 // branching involved in ureteric bud morphogenesis // inferred from direct assay///0001759 // organ induction // inferred from…	0005576 // extracellular region // traceable author statement///0005615 // extracellular space // traceable author statement///0005634 // nucleus // inferred from electronic annotation///0005737 // cytoplasm // inferred from electronic annotation///0005739 // mitochondrion // inferred from electronic annotation///0005829 // cytosol // inferred from electronic annotation	0005102 // receptor binding // inferred from electronic annotation///0005104 // fibroblast growth factor receptor binding // inferred from physical interaction///0005125 // cytokine activity // inferred from direct assay///0005515 // protein binding // inferred from physical interaction///0008083 // growth factor activity // inferred from direct assay///0008201 // heparin binding // inferred from…	chr4:123747862-123819376 (+) // 88.8 // q27
204470_at	CXCL1	2919	0002690 // positive regulation of leukocyte chemotaxis // not recorded///0006935 // chemotaxis // traceable author statement///0006954 // inflammatory response // inferred from electronic annotation///0006955 // immune response // not recorded///0007165 // signal transduction // traceable author statement///0007186 // G-protein coupled receptor signaling pathway // traceable author statement///00…	0005576 // extracellular region // traceable author statement///0005615 // extracellular space // inferred from electronic annotation///0005622 // intracellular // traceable author statement	0005102 // receptor binding // traceable author statement///0005125 // cytokine activity // inferred from electronic annotation///0008009 // chemokine activity // inferred from electronic annotation///0008047 // enzyme activator activity // traceable author statement///0008083 // growth factor activity // inferred from electronic annotation///0045236 // CXCR chemokine receptor binding // not reco…	chr4:74735108-74736953 (+) // 100.0 // q13.3
204489_s_at	CD44	960	0001658 // branching involved in ureteric bud morphogenesis // inferred from electronic annotation///0002246 // wound healing involved in inflammatory response // inferred from electronic annotation///0005975 // carbohydrate metabolic process // traceable author statement///0007155 // cell adhesion // inferred from electronic annotation///0007160 // cell-matrix adhesion // non-traceable author st…	0005737 // cytoplasm // inferred from direct assay///0005794 // Golgi apparatus // inferred from direct assay///0005886 // plasma membrane // inferred from direct assay///0005886 // plasma membrane // traceable author statement///0005887 // integral component of plasma membrane // non-traceable author statement///0005925 // focal adhesion // inferred from direct assay///0009897 // external side o…	0004415 // hyalurononglucosaminidase activity // inferred from direct assay///0004896 // cytokine receptor activity // inferred from direct assay///0005515 // protein binding // inferred from physical interaction///0005518 // collagen binding // non-traceable author statement///0005540 // hyaluronic acid binding // inferred from direct assay///0005540 // hyaluronic acid binding // non-traceable a…	chr11:35160822-35251573 (+) // 99.83 // p13
204490_s_at	CD44	960	0001658 // branching involved in ureteric bud morphogenesis // inferred from electronic annotation///0002246 // wound healing involved in inflammatory response // inferred from electronic annotation///0005975 // carbohydrate metabolic process // traceable author statement///0007155 // cell adhesion // inferred from electronic annotation///0007160 // cell-matrix adhesion // non-traceable author st…	0005737 // cytoplasm // inferred from direct assay///0005794 // Golgi apparatus // inferred from direct assay///0005886 // plasma membrane // inferred from direct assay///0005886 // plasma membrane // traceable author statement///0005887 // integral component of plasma membrane // non-traceable author statement///0005925 // focal adhesion // inferred from direct assay///0009897 // external side o…	0004415 // hyalurononglucosaminidase activity // inferred from direct assay///0004896 // cytokine receptor activity // inferred from direct assay///0005515 // protein binding // inferred from physical interaction///0005518 // collagen binding // non-traceable author statement///0005540 // hyaluronic acid binding // inferred from direct assay///0005540 // hyaluronic acid binding // non-traceable a…	chr11:35160735-35251021 (+) // 99.7 // p13
204517_at	PPIC	5480	0000413 // protein peptidyl-prolyl isomerization // not recorded///0006457 // protein folding // inferred from electronic annotation	0005737 // cytoplasm // inferred from electronic annotation///0070062 // extracellular exosome // inferred from direct assay	0003755 // peptidyl-prolyl cis-trans isomerase activity // not recorded///0005515 // protein binding // inferred from physical interaction///0016018 // cyclosporin A binding // inferred from direct assay///0016853 // isomerase activity // inferred from electronic annotation///0042277 // peptide binding // inferred from electronic annotation	chr5:122358867-122372401 (-) // 91.73 // q23.2
204518_s_at	PPIC	5480	0000413 // protein peptidyl-prolyl isomerization // not recorded///0006457 // protein folding // inferred from electronic annotation	0005737 // cytoplasm // inferred from electronic annotation///0070062 // extracellular exosome // inferred from direct assay	0003755 // peptidyl-prolyl cis-trans isomerase activity // not recorded///0005515 // protein binding // inferred from physical interaction///0016018 // cyclosporin A binding // inferred from direct assay///0016853 // isomerase activity // inferred from electronic annotation///0042277 // peptide binding // inferred from electronic annotation	chr5:122359489-122372401 (-) // 86.52 // q23.2
204591_at	CHL1	10752	0001764 // neuron migration // inferred from electronic annotation///0007155 // cell adhesion // inferred from electronic annotation///0007165 // signal transduction // traceable author statement///0007275 // multicellular organismal development // inferred from electronic annotation///0007399 // nervous system development // inferred from electronic annotation///0007411 // axon guidance // trace…	0005576 // extracellular region // inferred from electronic annotation///0005578 // proteinaceous extracellular matrix // inferred from electronic annotation///0005886 // plasma membrane // inferred from electronic annotation///0016020 // membrane // inferred from electronic annotation///0016021 // integral component of membrane // inferred from electronic annotation///0030425 // dendrite // infe…	0002020 // protease binding // inferred from electronic annotation///0005515 // protein binding // inferred from electronic annotation	chr3:238649-451090 (+) // 96.23 // p26.3
204662_at	CCP110	9738	0000086 // G2/M transition of mitotic cell cycle // traceable author statement///0000278 // mitotic cell cycle // traceable author statement///0006996 // organelle organization // traceable author statement///0007099 // centriole replication // inferred from mutant phenotype///0030030 // cell projection organization // inferred from electronic annotation///0032465 // regulation of cytokinesis // …	0005737 // cytoplasm // inferred from electronic annotation///0005813 // centrosome // inferred from direct assay///0005814 // centriole // inferred from direct assay///0005815 // microtubule organizing center // inferred from electronic annotation///0005829 // cytosol // traceable author statement///0005856 // cytoskeleton // inferred from electronic annotation///0005929 // cilium // inferred fr…	0005515 // protein binding // inferred from physical interaction	chr16:19535277-19564726 (+) // 91.78 // p12.3
204748_at	PTGS2	5743	0001516 // prostaglandin biosynthetic process // inferred from sequence or structural similarity///0001516 // prostaglandin biosynthetic process // non-traceable author statement///0001525 // angiogenesis // inferred from electronic annotation///0006629 // lipid metabolic process // inferred from electronic annotation///0006631 // fatty acid metabolic process // inferred from electronic annotatio…	0005634 // nucleus // inferred from sequence or structural similarity///0005737 // cytoplasm // inferred from direct assay///0005737 // cytoplasm // inferred from sequence or structural similarity///0005783 // endoplasmic reticulum // inferred from direct assay///0005788 // endoplasmic reticulum lumen // traceable author statement///0005789 // endoplasmic reticulum membrane // traceable author st…	0004601 // peroxidase activity // non-traceable author statement///0004666 // prostaglandin-endoperoxide synthase activity // inferred from direct assay///0005515 // protein binding // inferred from physical interaction///0008289 // lipid binding // inferred from electronic annotation///0016491 // oxidoreductase activity // inferred from electronic annotation///0016702 // oxidoreductase activity,…	chr1:186640968-186649556 (-) // 97.42 // q31.1
204787_at	VSIG4	11326	0002376 // immune system process // inferred from electronic annotation///0006957 // complement activation, alternative pathway // inferred from electronic annotation///0032703 // negative regulation of interleukin-2 production // inferred from electronic annotation///0042130 // negative regulation of T cell proliferation // inferred from electronic annotation///0045087 // innate immune response …	0016020 // membrane // inferred from electronic annotation///0016021 // integral component of membrane // inferred from electronic annotation///0070062 // extracellular exosome // inferred from direct assay	0005515 // protein binding // inferred from physical interaction	chrX:65241581-65259885 (-) // 98.94 // q12
204794_at	DUSP2	1844	0000188 // inactivation of MAPK activity // traceable author statement///0001706 // endoderm formation // not recorded///0006470 // protein dephosphorylation // not recorded///0016311 // dephosphorylation // inferred from electronic annotation///0035335 // peptidyl-tyrosine dephosphorylation // inferred from electronic annotation///0035335 // peptidyl-tyrosine dephosphorylation // traceable autho…	0005634 // nucleus // inferred from electronic annotation	0004721 // phosphoprotein phosphatase activity // inferred from electronic annotation///0004725 // protein tyrosine phosphatase activity // inferred from electronic annotation///0005515 // protein binding // inferred from physical interaction///0008138 // protein tyrosine/serine/threonine phosphatase activity // not recorded///0008330 // protein tyrosine/threonine phosphatase activity // traceabl…	chr2:96808916-96811179 (-) // 97.0 // q11.2
204856_at	B3GNT3	10331	0005975 // carbohydrate metabolic process // traceable author statement///0006486 // protein glycosylation // inferred from electronic annotation///0006493 // protein O-linked glycosylation // traceable author statement///0016266 // O-glycan processing // traceable author statement///0018146 // keratan sulfate biosynthetic process // traceable author statement///0030203 // glycosaminoglycan metab…	0000139 // Golgi membrane // traceable author statement///0005794 // Golgi apparatus // inferred from electronic annotation///0005887 // integral component of plasma membrane // traceable author statement///0016020 // membrane // inferred from electronic annotation///0016021 // integral component of membrane // inferred from electronic annotation	0008378 // galactosyltransferase activity // inferred from electronic annotation///0008532 // N-acetyllactosaminide beta-1,3-N-acetylglucosaminyltransferase activity // inferred from direct assay///0016740 // transferase activity // inferred from electronic annotation///0016757 // transferase activity, transferring glycosyl groups // inferred from electronic annotation///0047223 // beta-1,3-galac…	chr19:17905948-17923881 (+) // 96.94 // p13.11
204924_at	TLR2	7097	0001666 // response to hypoxia // inferred from electronic annotation///0001774 // microglial cell activation // inferred from electronic annotation///0002224 // toll-like receptor signaling pathway // traceable author statement///0002237 // response to molecule of bacterial origin // inferred from electronic annotation///0002238 // response to molecule of fungal origin // inferred from electroni…	0005737 // cytoplasm // inferred from direct assay///0005794 // Golgi apparatus // inferred from direct assay///0005886 // plasma membrane // inferred from direct assay///0005886 // plasma membrane // traceable author statement///0005887 // integral component of plasma membrane // traceable author statement///0009897 // external side of plasma membrane // inferred from electronic annotation///000…	0001530 // lipopolysaccharide binding // inferred from direct assay///0001875 // lipopolysaccharide receptor activity // traceable author statement///0004872 // receptor activity // inferred from direct assay///0004888 // transmembrane signaling receptor activity // inferred from electronic annotation///0005515 // protein binding // inferred from physical interaction///0008329 // signaling patter…	chr4:154624037-154626530 (+) // 95.77 // q31.3
204948_s_at	FST	10468	0000122 // negative regulation of transcription from RNA polymerase II promoter // inferred from direct assay///0001501 // skeletal system development // inferred from electronic annotation///0002244 // hematopoietic progenitor cell differentiation // inferred from direct assay///0007165 // signal transduction // non-traceable author statement///0007276 // gamete generation // inferred from elect…	0005576 // extracellular region // traceable author statement///0005634 // nucleus // inferred from electronic annotation///0005737 // cytoplasm // inferred from electronic annotation	0004871 // signal transducer activity // non-traceable author statement///0005515 // protein binding // inferred from physical interaction///0043395 // heparan sulfate proteoglycan binding // inferred from electronic annotation///0048185 // activin binding // inferred from physical interaction	chr5:52776594-52781902 (+) // 98.04 // q11.2
204951_at	RHOH	399	0006355 // regulation of transcription, DNA-templated // non-traceable author statement///0007165 // signal transduction // inferred from electronic annotation///0007264 // small GTPase mediated signal transduction // traceable author statement///0015031 // protein transport // inferred from electronic annotation///0030217 // T cell differentiation // non-traceable author statement///0034260 // n…	0001772 // immunological synapse // inferred from electronic annotation///0005622 // intracellular // inferred from electronic annotation///0005737 // cytoplasm // inferred from direct assay///0005829 // cytosol // traceable author statement///0005886 // plasma membrane // traceable author statement///0016020 // membrane // inferred from electronic annotation	0000166 // nucleotide binding // inferred from electronic annotation///0005095 // GTPase inhibitor activity // non-traceable author statement///0005515 // protein binding // inferred from physical interaction///0005525 // GTP binding // inferred from direct assay///0017048 // Rho GTPase binding // non-traceable author statement///0019210 // kinase inhibitor activity // inferred from direct assay	chr4:40198671-40245853 (+) // 98.55 // p14
204970_s_at	MAFG	4097	0001701 // in utero embryonic development // inferred from electronic annotation///0006351 // transcription, DNA-templated // inferred from electronic annotation///0006355 // regulation of transcription, DNA-templated // inferred from electronic annotation///0006357 // regulation of transcription from RNA polymerase II promoter // not recorded///0006366 // transcription from RNA polymerase II pro…	0005634 // nucleus // inferred from electronic annotation///0005654 // nucleoplasm // traceable author statement	0001228 // transcriptional activator activity, RNA polymerase II transcription regulatory region sequence-specific binding // not recorded///0003677 // DNA binding // inferred from electronic annotation///0003700 // transcription factor activity, sequence-specific DNA binding // non-traceable author statement///0005515 // protein binding // inferred from physical interaction///0043565 // sequence…	chr17:79879494-79881091 (-) // 83.6 // q25.3
205043_at	CFTR	1080	0006695 // cholesterol biosynthetic process // inferred from electronic annotation///0006810 // transport // traceable author statement///0006811 // ion transport // inferred from electronic annotation///0006821 // chloride transport // inferred from electronic annotation///0006833 // water transport // inferred from electronic annotation///0006904 // vesicle docking involved in exocytosis // inf…	0005737 // cytoplasm // inferred from direct assay///0005765 // lysosomal membrane // traceable author statement///0005768 // endosome // inferred from electronic annotation///0005769 // early endosome // inferred from direct assay///0005829 // cytosol // inferred from direct assay///0005886 // plasma membrane // inferred from direct assay///0005886 // plasma membrane // traceable author statemen…	0000166 // nucleotide binding // inferred from electronic annotation///0005224 // ATP-binding and phosphorylation-dependent chloride channel activity // traceable author statement///0005254 // chloride channel activity // inferred from direct assay///0005254 // chloride channel activity // inferred from mutant phenotype///0005260 // channel-conductance-controlling ATPase activity // non-traceable…	chr7:117120016-117308715 (+) // 99.4 // q31.2
205067_at	IL1B	3553	0000122 // negative regulation of transcription from RNA polymerase II promoter // inferred from electronic annotation///0000165 // MAPK cascade // inferred from mutant phenotype///0000187 // activation of MAPK activity // inferred from direct assay///0001660 // fever generation // inferred from electronic annotation///0001666 // response to hypoxia // inferred from electronic annotation///000193…	0005576 // extracellular region // inferred from direct assay///0005576 // extracellular region // non-traceable author statement///0005576 // extracellular region // traceable author statement///0005615 // extracellular space // inferred from direct assay///0005615 // extracellular space // inferred from mutant phenotype///0005737 // cytoplasm // inferred from electronic annotation///0005764 // …	0005102 // receptor binding // inferred from electronic annotation///0005125 // cytokine activity // inferred from direct assay///0005125 // cytokine activity // inferred from mutant phenotype///0005149 // interleukin-1 receptor binding // non-traceable author statement///0019904 // protein domain specific binding // inferred from physical interaction	chr2:113587336-113594352 (-) // 97.26 // q13
205077_s_at	PIGF	5281	0006501 // C-terminal protein lipidation // traceable author statement///0006506 // GPI anchor biosynthetic process // inferred from sequence or structural similarity///0016254 // preassembly of GPI anchor in ER membrane // traceable author statement///0043687 // post-translational protein modification // traceable author statement///0044267 // cellular protein metabolic process // traceable auth…	0005783 // endoplasmic reticulum // inferred from electronic annotation///0005789 // endoplasmic reticulum membrane // inferred from sequence or structural similarity///0005789 // endoplasmic reticulum membrane // traceable author statement///0016020 // membrane // inferred from electronic annotation///0016021 // integral component of membrane // inferred from electronic annotation	0004307 // ethanolaminephosphotransferase activity // traceable author statement	chr2:46808426-46844154 (-) // 100.0 // p21
205078_at	PIGF	5281	0006501 // C-terminal protein lipidation // traceable author statement///0006506 // GPI anchor biosynthetic process // inferred from sequence or structural similarity///0016254 // preassembly of GPI anchor in ER membrane // traceable author statement///0043687 // post-translational protein modification // traceable author statement///0044267 // cellular protein metabolic process // traceable auth…	0005783 // endoplasmic reticulum // inferred from electronic annotation///0005789 // endoplasmic reticulum membrane // inferred from sequence or structural similarity///0005789 // endoplasmic reticulum membrane // traceable author statement///0016020 // membrane // inferred from electronic annotation///0016021 // integral component of membrane // inferred from electronic annotation	0004307 // ethanolaminephosphotransferase activity // traceable author statement	chr2:46808426-46844154 (-) // 100.0 // p21
205130_at	MOK	5891	0006468 // protein phosphorylation // inferred from electronic annotation///0007165 // signal transduction // traceable author statement///0016310 // phosphorylation // inferred from electronic annotation///0051726 // regulation of cell cycle // inferred from electronic annotation	0005737 // cytoplasm // inferred from electronic annotation	0000166 // nucleotide binding // inferred from electronic annotation///0004672 // protein kinase activity // traceable author statement///0004674 // protein serine/threonine kinase activity // traceable author statement///0004693 // cyclin-dependent protein serine/threonine kinase activity // inferred from electronic annotation///0005524 // ATP binding // inferred from electronic annotation///001…	chr14:102695178-102771531 (-) // 98.87 // q32.31
205150_s_at	TRIL	9865	0002376 // immune system process // inferred from electronic annotation///0002718 // regulation of cytokine production involved in immune response // inferred from direct assay///0006954 // inflammatory response // inferred from electronic annotation///0034142 // toll-like receptor 4 signaling pathway // inferred from direct assay///0045087 // innate immune response // inferred from electronic an…	0016020 // membrane // inferred from electronic annotation///0016021 // integral component of membrane // inferred from electronic annotation///0046696 // lipopolysaccharide receptor complex // inferred from direct assay	0001530 // lipopolysaccharide binding // inferred from direct assay///0005515 // protein binding // inferred from electronic annotation	chr7:28992975-28997908 (-) // 98.87 // p14.3
205151_s_at	TRIL	9865	0002376 // immune system process // inferred from electronic annotation///0002718 // regulation of cytokine production involved in immune response // inferred from direct assay///0006954 // inflammatory response // inferred from electronic annotation///0034142 // toll-like receptor 4 signaling pathway // inferred from direct assay///0045087 // innate immune response // inferred from electronic an…	0016020 // membrane // inferred from electronic annotation///0016021 // integral component of membrane // inferred from electronic annotation///0046696 // lipopolysaccharide receptor complex // inferred from direct assay	0001530 // lipopolysaccharide binding // inferred from direct assay///0005515 // protein binding // inferred from electronic annotation	chr7:28992975-28997908 (-) // 99.05 // p14.3
205175_s_at	KHK	3795	0005975 // carbohydrate metabolic process // traceable author statement///0006000 // fructose metabolic process // traceable author statement///0009744 // response to sucrose // inferred from electronic annotation///0009749 // response to glucose // inferred from electronic annotation///0009750 // response to fructose // inferred from electronic annotation///0010043 // response to zinc ion // inf…	0005634 // nucleus // inferred from electronic annotation///0005737 // cytoplasm // inferred from direct assay///0005829 // cytosol // traceable author statement///0070062 // extracellular exosome // inferred from direct assay	0000166 // nucleotide binding // inferred from electronic annotation///0004454 // ketohexokinase activity // not recorded///0004454 // ketohexokinase activity // inferred from direct assay///0005515 // protein binding // inferred from physical interaction///0005524 // ATP binding // inferred from electronic annotation///0008865 // fructokinase activity // inferred from direct assay///0016301 // k…	chr2:27310119-27323601 (+) // 89.47 // p23.3
205236_x_at	SOD3	6649	0000302 // response to reactive oxygen species // traceable author statement///0001666 // response to hypoxia // inferred from electronic annotation///0006801 // superoxide metabolic process // inferred from electronic annotation///0006979 // response to oxidative stress // inferred from electronic annotation///0019430 // removal of superoxide radicals // not recorded///0046688 // response to cop…	0005576 // extracellular region // traceable author statement///0005615 // extracellular space // inferred from direct assay///0005634 // nucleus // inferred from electronic annotation///0005737 // cytoplasm // not recorded///0005796 // Golgi lumen // traceable author statement///0005802 // trans-Golgi network // inferred from electronic annotation///0031012 // extracellular matrix // inferred fr…	0004784 // superoxide dismutase activity // not recorded///0004784 // superoxide dismutase activity // traceable author statement///0005507 // copper ion binding // not recorded///0005515 // protein binding // inferred from physical interaction///0008201 // heparin binding // inferred from electronic annotation///0008270 // zinc ion binding // not recorded///0016209 // antioxidant activity // inf…	chr4:24796054-24802464 (+) // 94.96 // p15.2
205254_x_at	TCF7	6932	0006351 // transcription, DNA-templated // inferred from electronic annotation///0006355 // regulation of transcription, DNA-templated // inferred from electronic annotation///0006355 // regulation of transcription, DNA-templated // ---///0006357 // regulation of transcription from RNA polymerase II promoter // not recorded///0006955 // immune response // traceable author statement///0007420 // b…	0005634 // nucleus // inferred from direct assay///0005654 // nucleoplasm // traceable author statement///0005667 // transcription factor complex // not recorded	0003677 // DNA binding // inferred from electronic annotation///0003682 // chromatin binding // not recorded///0003700 // transcription factor activity, sequence-specific DNA binding // not recorded///0005515 // protein binding // inferred from physical interaction///0008013 // beta-catenin binding // inferred from direct assay///0043565 // sequence-specific DNA binding // not recorded///0044212 …	chr5:133451315-133483919 (+) // 89.28 // q31.1
205255_x_at	TCF7	6932	0006351 // transcription, DNA-templated // inferred from electronic annotation///0006355 // regulation of transcription, DNA-templated // inferred from electronic annotation///0006355 // regulation of transcription, DNA-templated // ---///0006357 // regulation of transcription from RNA polymerase II promoter // not recorded///0006955 // immune response // traceable author statement///0007420 // b…	0005634 // nucleus // inferred from direct assay///0005654 // nucleoplasm // traceable author statement///0005667 // transcription factor complex // not recorded	0003677 // DNA binding // inferred from electronic annotation///0003682 // chromatin binding // not recorded///0003700 // transcription factor activity, sequence-specific DNA binding // not recorded///0005515 // protein binding // inferred from physical interaction///0008013 // beta-catenin binding // inferred from direct assay///0043565 // sequence-specific DNA binding // not recorded///0044212 …	chr5:133451315-133483919 (+) // 89.07 // q31.1
205447_s_at	MAP3K12	7786	0000165 // MAPK cascade // inferred from electronic annotation///0000186 // activation of MAPKK activity // inferred from electronic annotation///0006468 // protein phosphorylation // inferred from direct assay///0006468 // protein phosphorylation // inferred from sequence or structural similarity///0007254 // JNK cascade // inferred from sequence or structural similarity///0016310 // phosphoryla…	0005622 // intracellular // inferred from electronic annotation///0005737 // cytoplasm // traceable author statement///0005829 // cytosol // inferred from sequence or structural similarity///0005886 // plasma membrane // inferred from sequence or structural similarity///0016020 // membrane // inferred from sequence or structural similarity///0030424 // axon // inferred from electronic annotation/…	0000166 // nucleotide binding // inferred from electronic annotation///0004672 // protein kinase activity // traceable author statement///0004674 // protein serine/threonine kinase activity // inferred from sequence or structural similarity///0004709 // MAP kinase kinase kinase activity // inferred from electronic annotation///0005515 // protein binding // inferred from physical interaction///000…	chr12:53874276-53893271 (-) // 97.57 // q13.13
205448_s_at	MAP3K12	7786	0000165 // MAPK cascade // inferred from electronic annotation///0000186 // activation of MAPKK activity // inferred from electronic annotation///0006468 // protein phosphorylation // inferred from direct assay///0006468 // protein phosphorylation // inferred from sequence or structural similarity///0007254 // JNK cascade // inferred from sequence or structural similarity///0016310 // phosphoryla…	0005622 // intracellular // inferred from electronic annotation///0005737 // cytoplasm // traceable author statement///0005829 // cytosol // inferred from sequence or structural similarity///0005886 // plasma membrane // inferred from sequence or structural similarity///0016020 // membrane // inferred from sequence or structural similarity///0030424 // axon // inferred from electronic annotation/…	0000166 // nucleotide binding // inferred from electronic annotation///0004672 // protein kinase activity // traceable author statement///0004674 // protein serine/threonine kinase activity // inferred from sequence or structural similarity///0004709 // MAP kinase kinase kinase activity // inferred from electronic annotation///0005515 // protein binding // inferred from physical interaction///000…	chr12:53874279-53893271 (-) // 98.48 // q13.13
205499_at	SRPX2	27286	0001525 // angiogenesis // inferred from electronic annotation///0007155 // cell adhesion // inferred from electronic annotation///0016337 // single organismal cell-cell adhesion // inferred from direct assay///0042325 // regulation of phosphorylation // inferred from direct assay///0048870 // cell motility // inferred from direct assay///0051965 // positive regulation of synapse assembly // infe…	0005576 // extracellular region // inferred from electronic annotation///0005615 // extracellular space // inferred from direct assay///0005737 // cytoplasm // inferred from direct assay///0009986 // cell surface // inferred from sequence or structural similarity///0030054 // cell junction // inferred from electronic annotation///0045202 // synapse // inferred from electronic annotation///0060076…	0005102 // receptor binding // inferred from physical interaction///0005515 // protein binding // inferred from physical interaction///0036458 // hepatocyte growth factor binding // inferred from direct assay///0042802 // identical protein binding // inferred from direct assay	chrX:99899224-99926292 (+) // 97.23 // q22.1
205500_at	C5	727	0000187 // activation of MAPK activity // traceable author statement///0001701 // in utero embryonic development // inferred from electronic annotation///0002376 // immune system process // inferred from electronic annotation///0002523 // leukocyte migration involved in inflammatory response // inferred from electronic annotation///0006874 // cellular calcium ion homeostasis // inferred from elec…	0005576 // extracellular region // traceable author statement///0005579 // membrane attack complex // inferred from electronic annotation///0005615 // extracellular space // inferred from electronic annotation///0070062 // extracellular exosome // inferred from direct assay	0004866 // endopeptidase inhibitor activity // inferred from electronic annotation///0005102 // receptor binding // traceable author statement///0005515 // protein binding // inferred from physical interaction///0008009 // chemokine activity // traceable author statement///0031714 // C5a anaphylatoxin chemotactic receptor binding // inferred from electronic annotation	chr9:123714615-123812536 (-) // 99.87 // q33.2
205538_at	CORO2A	7464	0030036 // actin cytoskeleton organization // not recorded///0035556 // intracellular signal transduction // traceable author statement	0015629 // actin cytoskeleton // not recorded///0017053 // transcriptional repressor complex // inferred from direct assay	0003779 // actin binding // inferred from electronic annotation///0051015 // actin filament binding // not recorded	chr9:100886471-100935174 (-) // 90.58 // q22.33
205558_at	TRAF6	7189	0000122 // negative regulation of transcription from RNA polymerase II promoter // inferred from mutant phenotype///0000187 // activation of MAPK activity // traceable author statement///0000209 // protein polyubiquitination // inferred from direct assay///0001503 // ossification // inferred from electronic annotation///0001843 // neural tube closure // inferred from electronic annotation///00022…	0005634 // nucleus // inferred from direct assay///0005730 // nucleolus // inferred from direct assay///0005737 // cytoplasm // inferred from direct assay///0005739 // mitochondrion // inferred from direct assay///0005811 // lipid particle // inferred from sequence or structural similarity///0005829 // cytosol // traceable author statement///0005886 // plasma membrane // inferred from direct assa…	0004842 // ubiquitin-protein transferase activity // not recorded///0004842 // ubiquitin-protein transferase activity // inferred from direct assay///0004842 // ubiquitin-protein transferase activity // traceable author statement///0005164 // tumor necrosis factor receptor binding // inferred from physical interaction///0005515 // protein binding // inferred from physical interaction///0008270 //…	chr11:36510955-36531796 (-) // 98.14 // p12
205569_at	LAMP3	27074	0002250 // adaptive immune response // inferred from electronic annotation///0002376 // immune system process // inferred from electronic annotation///0008283 // cell proliferation // traceable author statement	0005764 // lysosome // inferred from electronic annotation///0005765 // lysosomal membrane // inferred from electronic annotation///0016020 // membrane // inferred from electronic annotation///0016021 // integral component of membrane // inferred from electronic annotation///0030659 // cytoplasmic vesicle membrane // inferred from electronic annotation///0031410 // cytoplasmic vesicle // inferred…		chr3:182840003-182880506 (-) // 83.42 // q27.1
205581_s_at	NOS3	4846	0001525 // angiogenesis // inferred from electronic annotation///0001542 // ovulation from ovarian follicle // inferred from electronic annotation///0001701 // in utero embryonic development // inferred from electronic annotation///0001974 // blood vessel remodeling // inferred from sequence or structural similarity///0002028 // regulation of sodium ion transport // inferred from electronic annot…	0000139 // Golgi membrane // traceable author statement///0005634 // nucleus // inferred from sequence or structural similarity///0005737 // cytoplasm // inferred from direct assay///0005794 // Golgi apparatus // inferred from electronic annotation///0005829 // cytosol // not recorded///0005829 // cytosol // traceable author statement///0005856 // cytoskeleton // inferred from electronic annotati…	0003785 // actin monomer binding // inferred from physical interaction///0003958 // NADPH-hemoprotein reductase activity // not recorded///0004517 // nitric-oxide synthase activity // inferred from direct assay///0004517 // nitric-oxide synthase activity // inferred from mutant phenotype///0005506 // iron ion binding // inferred from electronic annotation///0005515 // protein binding // inferred …	chr7:150690871-150711315 (+) // 99.11 // q36.1
205611_at	TNFSF12	8742	0001525 // angiogenesis // inferred from electronic annotation///0001938 // positive regulation of endothelial cell proliferation // traceable author statement///0002376 // immune system process // inferred from electronic annotation///0002426 // immunoglobulin production in mucosal tissue // inferred from electronic annotation///0002636 // positive regulation of germinal center formation // infe…	0005576 // extracellular region // traceable author statement///0005615 // extracellular space // inferred from electronic annotation///0005615 // extracellular space // traceable author statement///0005654 // nucleoplasm // traceable author statement///0005737 // cytoplasm // inferred from direct assay///0005829 // cytosol // traceable author statement///0005886 // plasma membrane // traceable a…	0005102 // receptor binding // traceable author statement///0005125 // cytokine activity // inferred from electronic annotation///0005125 // cytokine activity // traceable author statement///0005164 // tumor necrosis factor receptor binding // inferred from electronic annotation///0005515 // protein binding // inferred from physical interaction	chr17:7452453-7461205 (+) // 99.69 // p13.1
205629_s_at	CRH	1392	0001934 // positive regulation of protein phosphorylation // inferred from electronic annotation///0001963 // synaptic transmission, dopaminergic // inferred from direct assay///0006704 // glucocorticoid biosynthetic process // inferred from electronic annotation///0006954 // inflammatory response // inferred from direct assay///0007165 // signal transduction // traceable author statement///00072…	0005576 // extracellular region // traceable author statement///0005615 // extracellular space // inferred from direct assay///0005737 // cytoplasm // inferred from electronic annotation///0043025 // neuronal cell body // inferred from electronic annotation///0043196 // varicosity // inferred from electronic annotation///0043204 // perikaryon // inferred from electronic annotation	0005102 // receptor binding // traceable author statement///0005179 // hormone activity // traceable author statement///0005184 // neuropeptide hormone activity // traceable author statement///0005515 // protein binding // inferred from physical interaction///0017045 // corticotropin-releasing hormone activity // inferred from electronic annotation///0051430 // corticotropin-releasing hormone rec…	chr8:67089083-67090691 (-) // 88.85 // q13.1
205630_at	CRH	1392	0001934 // positive regulation of protein phosphorylation // inferred from electronic annotation///0001963 // synaptic transmission, dopaminergic // inferred from direct assay///0006704 // glucocorticoid biosynthetic process // inferred from electronic annotation///0006954 // inflammatory response // inferred from direct assay///0007165 // signal transduction // traceable author statement///00072…	0005576 // extracellular region // traceable author statement///0005615 // extracellular space // inferred from direct assay///0005737 // cytoplasm // inferred from electronic annotation///0043025 // neuronal cell body // inferred from electronic annotation///0043196 // varicosity // inferred from electronic annotation///0043204 // perikaryon // inferred from electronic annotation	0005102 // receptor binding // traceable author statement///0005179 // hormone activity // traceable author statement///0005184 // neuropeptide hormone activity // traceable author statement///0005515 // protein binding // inferred from physical interaction///0017045 // corticotropin-releasing hormone activity // inferred from electronic annotation///0051430 // corticotropin-releasing hormone rec…	chr8:67088618-67090698 (-) // 94.84 // q13.1
205638_at	ADGRB3	577	0007165 // signal transduction // inferred from electronic annotation///0007166 // cell surface receptor signaling pathway // inferred from electronic annotation///0007186 // G-protein coupled receptor signaling pathway // inferred from electronic annotation///0007520 // myoblast fusion // inferred from direct assay///0016525 // negative regulation of angiogenesis // inferred from electronic anno…	0005886 // plasma membrane // inferred from physical interaction///0016020 // membrane // inferred from electronic annotation///0016021 // integral component of membrane // inferred from electronic annotation	0004871 // signal transducer activity // inferred from electronic annotation///0004888 // transmembrane signaling receptor activity // inferred from electronic annotation///0004930 // G-protein coupled receptor activity // inferred from electronic annotation///0005096 // GTPase activator activity // inferred from sequence or structural similarity///0005515 // protein binding // inferred from phys…	chr6:69348550-70099399 (+) // 99.66 // q12
205704_s_at	ATP6V0A2	23545	0006810 // transport // inferred from electronic annotation///0006811 // ion transport // inferred from electronic annotation///0006879 // cellular iron ion homeostasis // traceable author statement///0006955 // immune response // traceable author statement///0007035 // vacuolar acidification // not recorded///0008286 // insulin receptor signaling pathway // traceable author statement///0015986 /…	0000220 // vacuolar proton-transporting V-type ATPase, V0 domain // inferred from electronic annotation///0001669 // acrosomal vesicle // inferred from electronic annotation///0005737 // cytoplasm // inferred from direct assay///0005765 // lysosomal membrane // inferred from direct assay///0005768 // endosome // inferred from electronic annotation///0005886 // plasma membrane // inferred from dir…	0005515 // protein binding // inferred from physical interaction///0015078 // hydrogen ion transmembrane transporter activity // inferred from electronic annotation///0046961 // proton-transporting ATPase activity, rotational mechanism // not recorded///0051117 // ATPase binding // not recorded	chr12:124197107-124242721 (+) // 99.82 // q24.31
205725_at	SCGB1A1	7356	0000122 // negative regulation of transcription from RNA polymerase II promoter // inferred from electronic annotation///0007165 // signal transduction // inferred from electronic annotation///0007565 // female pregnancy // non-traceable author statement///0007566 // embryo implantation // traceable author statement///0009410 // response to xenobiotic stimulus // inferred from electronic annotati…	0005576 // extracellular region // inferred from electronic annotation///0005615 // extracellular space // inferred from electronic annotation///0005622 // intracellular // inferred from electronic annotation///0005635 // nuclear envelope // inferred from electronic annotation///0005737 // cytoplasm // inferred from electronic annotation///0005783 // endoplasmic reticulum // inferred from electro…	0005515 // protein binding // inferred from physical interaction///0019834 // phospholipase A2 inhibitor activity // inferred from electronic annotation///0097160 // polychlorinated biphenyl binding // inferred from electronic annotation	chr11:62186559-62190666 (+) // 97.48 // q12.3
205753_at	CRP	1401	0001666 // response to hypoxia // inferred from electronic annotation///0006953 // acute-phase response // traceable author statement///0006954 // inflammatory response // traceable author statement///0006958 // complement activation, classical pathway // inferred from electronic annotation///0007568 // aging // inferred from electronic annotation///0008228 // opsonization // traceable author sta…	0005576 // extracellular region // non-traceable author statement///0005615 // extracellular space // inferred from direct assay///0030175 // filopodium // inferred from electronic annotation///0030426 // growth cone // inferred from electronic annotation///0070062 // extracellular exosome // inferred from direct assay	0001849 // complement component C1q binding // inferred from direct assay///0005509 // calcium ion binding // inferred from direct assay///0005515 // protein binding // inferred from physical interaction///0015485 // cholesterol binding // inferred from electronic annotation///0030169 // low-density lipoprotein particle binding // inferred from direct assay///0033265 // choline binding // traceab…	chr1:159682451-159684364 (-) // 90.31 // q23.2
205765_at	CYP3A5	1577	0006805 // xenobiotic metabolic process // traceable author statement///0008202 // steroid metabolic process // traceable author statement///0009822 // alkaloid catabolic process // inferred from direct assay///0042737 // drug catabolic process // inferred from direct assay///0044281 // small molecule metabolic process // traceable author statement///0055114 // oxidation-reduction process // infe…	0005783 // endoplasmic reticulum // inferred from electronic annotation///0005789 // endoplasmic reticulum membrane // traceable author statement///0016020 // membrane // inferred from electronic annotation///0016021 // integral component of membrane // inferred from electronic annotation///0031090 // organelle membrane // inferred from electronic annotation///0043231 // intracellular membrane-bo…	0004497 // monooxygenase activity // inferred from sequence or structural similarity///0005506 // iron ion binding // inferred from electronic annotation///0016491 // oxidoreductase activity // inferred from direct assay///0016705 // oxidoreductase activity, acting on paired donors, with incorporation or reduction of molecular oxygen // inferred from electronic annotation///0016712 // oxidoreduct…	chr7:99245816-99277606 (-) // 99.94 // q22.1
205816_at	ITGB8	3696	0001573 // ganglioside metabolic process // inferred from electronic annotation///0007155 // cell adhesion // traceable author statement///0007160 // cell-matrix adhesion // inferred from mutant phenotype///0007229 // integrin-mediated signaling pathway // inferred from electronic annotation///0010628 // positive regulation of gene expression // inferred from mutant phenotype///0010629 // negativ…	0005886 // plasma membrane // traceable author statement///0008305 // integrin complex // traceable author statement///0009986 // cell surface // inferred from direct assay///0016020 // membrane // inferred from electronic annotation///0016021 // integral component of membrane // inferred from electronic annotation///0034686 // integrin alphav-beta8 complex // inferred from direct assay///0070062…	0004872 // receptor activity // inferred from electronic annotation///0005102 // receptor binding // inferred from electronic annotation///1990430 // extracellular matrix protein binding // inferred from direct assay	chr7:20370745-20450419 (+) // 99.34 // p21.1
205840_x_at	GH1	2688	0002092 // positive regulation of receptor internalization // inferred from direct assay///0007259 // JAK-STAT cascade // inferred from direct assay///0010535 // positive regulation of activation of JAK2 kinase activity // inferred from direct assay///0014068 // positive regulation of phosphatidylinositol 3-kinase signaling // inferred from direct assay///0015758 // glucose transport // inferred …	0005576 // extracellular region // traceable author statement///0005615 // extracellular space // inferred from direct assay///0005622 // intracellular // inferred from direct assay///0005622 // intracellular // traceable author statement	0005131 // growth hormone receptor binding // inferred from direct assay///0005131 // growth hormone receptor binding // inferred from physical interaction///0005148 // prolactin receptor binding // inferred from direct assay///0005148 // prolactin receptor binding // inferred from physical interaction///0005179 // hormone activity // inferred from electronic annotation///0005515 // protein bindi…	chr17:61994562-61996198 (-) // 99.88 // q23.3
205844_at	VNN1	8876	0002526 // acute inflammatory response // inferred from sequence or structural similarity///0002544 // chronic inflammatory response // inferred from sequence or structural similarity///0006807 // nitrogen compound metabolic process // inferred from electronic annotation///0006928 // movement of cell or subcellular component // traceable author statement///0006954 // inflammatory response // infe…	0005886 // plasma membrane // inferred from electronic annotation///0016020 // membrane // inferred from electronic annotation///0016021 // integral component of membrane // traceable author statement///0031225 // anchored component of membrane // inferred from electronic annotation///0070062 // extracellular exosome // inferred from direct assay	0016787 // hydrolase activity // inferred from electronic annotation///0016810 // hydrolase activity, acting on carbon-nitrogen (but not peptide) bonds // inferred from electronic annotation///0016811 // hydrolase activity, acting on carbon-nitrogen (but not peptide) bonds, in linear amides // inferred from electronic annotation///0017159 // pantetheine hydrolase activity // inferred from direct …	chr6:133002729-133035188 (-) // 88.23 // q23.2
205863_at	S100A12	6283	0002376 // immune system process // inferred from electronic annotation///0002548 // monocyte chemotaxis // traceable author statement///0006805 // xenobiotic metabolic process // inferred from direct assay///0006954 // inflammatory response // inferred from electronic annotation///0030593 // neutrophil chemotaxis // traceable author statement///0031640 // killing of cells of other organism // in…	0005576 // extracellular region // traceable author statement///0005634 // nucleus // inferred from direct assay///0005737 // cytoplasm // inferred from direct assay///0005829 // cytosol // traceable author statement///0005856 // cytoskeleton // traceable author statement///0005886 // plasma membrane // traceable author statement///0016020 // membrane // inferred from electronic annotation	0005507 // copper ion binding // traceable author statement///0005509 // calcium ion binding // traceable author statement///0005515 // protein binding // inferred from physical interaction///0008270 // zinc ion binding // traceable author statement///0046872 // metal ion binding // inferred from electronic annotation///0050786 // RAGE receptor binding // inferred from direct assay///0050786 // R…	chr1:153346183-153348075 (-) // 100.0 // q21.3
205884_at	ITGA4	3676	0001974 // blood vessel remodeling // inferred from electronic annotation///0002687 // positive regulation of leukocyte migration // inferred from electronic annotation///0003366 // cell-matrix adhesion involved in ameboidal cell migration // inferred from mutant phenotype///0007155 // cell adhesion // inferred from electronic annotation///0007157 // heterophilic cell-cell adhesion via plasma mem…	0005886 // plasma membrane // inferred from direct assay///0005886 // plasma membrane // traceable author statement///0005911 // cell-cell junction // inferred from electronic annotation///0005925 // focal adhesion // inferred from direct assay///0008305 // integrin complex // inferred from electronic annotation///0009897 // external side of plasma membrane // inferred from electronic annotation/…	0001968 // fibronectin binding // inferred from electronic annotation///0005515 // protein binding // inferred from physical interaction///0046872 // metal ion binding // inferred from electronic annotation///0050839 // cell adhesion molecule binding // inferred from mutant phenotype///0050839 // cell adhesion molecule binding // inferred from physical interaction///1990405 // protein antigen bin…	chr2:182321210-182400910 (+) // 99.68 // q31.3
205885_s_at	ITGA4	3676	0001974 // blood vessel remodeling // inferred from electronic annotation///0002687 // positive regulation of leukocyte migration // inferred from electronic annotation///0003366 // cell-matrix adhesion involved in ameboidal cell migration // inferred from mutant phenotype///0007155 // cell adhesion // inferred from electronic annotation///0007157 // heterophilic cell-cell adhesion via plasma mem…	0005886 // plasma membrane // inferred from direct assay///0005886 // plasma membrane // traceable author statement///0005911 // cell-cell junction // inferred from electronic annotation///0005925 // focal adhesion // inferred from direct assay///0008305 // integrin complex // inferred from electronic annotation///0009897 // external side of plasma membrane // inferred from electronic annotation/…	0001968 // fibronectin binding // inferred from electronic annotation///0005515 // protein binding // inferred from physical interaction///0046872 // metal ion binding // inferred from electronic annotation///0050839 // cell adhesion molecule binding // inferred from mutant phenotype///0050839 // cell adhesion molecule binding // inferred from physical interaction///1990405 // protein antigen bin…	chr2:182321951-182400287 (+) // 99.61 // q31.3
205901_at	PNOC	5368	0007165 // signal transduction // traceable author statement///0007218 // neuropeptide signaling pathway // inferred from electronic annotation///0007268 // synaptic transmission // inferred from electronic annotation///0007565 // female pregnancy // inferred from electronic annotation///0007600 // sensory perception // traceable author statement	0005576 // extracellular region // traceable author statement	0001515 // opioid peptide activity // inferred from electronic annotation///0005184 // neuropeptide hormone activity // traceable author statement///0005515 // protein binding // inferred from physical interaction	chr8:28174648-28200867 (+) // 99.67 // p21.1
205926_at	IL27RA	9466	0002827 // positive regulation of T-helper 1 type immune response // inferred from electronic annotation///0002829 // negative regulation of type 2 immune response // inferred from electronic annotation///0006955 // immune response // traceable author statement///0007166 // cell surface receptor signaling pathway // traceable author statement///0032729 // positive regulation of interferon-gamma p…	0005887 // integral component of plasma membrane // traceable author statement///0016020 // membrane // inferred from electronic annotation///0016021 // integral component of membrane // inferred from electronic annotation	0004888 // transmembrane signaling receptor activity // traceable author statement///0005515 // protein binding // inferred from electronic annotation///0045509 // interleukin-27 receptor activity // inferred from electronic annotation	chr19:14142551-14163716 (+) // 84.64 // p13.12
205979_at	SCGB2A1	4246	0030521 // androgen receptor signaling pathway // inferred from direct assay	0005615 // extracellular space // inferred from direct assay	0046982 // protein heterodimerization activity // inferred from direct assay	chr11:61976139-61981408 (+) // 100.0 // q12.3
205997_at	ADAM28	10863	0006508 // proteolysis // inferred from electronic annotation///0007229 // integrin-mediated signaling pathway // inferred from electronic annotation///0007283 // spermatogenesis // traceable author statement	0005576 // extracellular region // inferred from electronic annotation///0005886 // plasma membrane // inferred from electronic annotation///0016020 // membrane // inferred from electronic annotation///0016021 // integral component of membrane // inferred from electronic annotation	0004222 // metalloendopeptidase activity // inferred from electronic annotation///0005515 // protein binding // inferred from electronic annotation///0008233 // peptidase activity // inferred from electronic annotation///0008237 // metallopeptidase activity // inferred from direct assay///0008270 // zinc ion binding // inferred from electronic annotation///0016787 // hydrolase activity // inferre…	chr8:24151623-24212309 (+) // 98.53 // p21.2
205998_x_at	CYP3A4	1576	0006629 // lipid metabolic process // traceable author statement///0006706 // steroid catabolic process // inferred from mutant phenotype///0006805 // xenobiotic metabolic process // traceable author statement///0008202 // steroid metabolic process // inferred from mutant phenotype///0008209 // androgen metabolic process // traceable author statement///0009822 // alkaloid catabolic process // inf…	0005737 // cytoplasm // inferred from direct assay///0005783 // endoplasmic reticulum // inferred from electronic annotation///0005789 // endoplasmic reticulum membrane // traceable author statement///0016020 // membrane // inferred from electronic annotation///0016020 // membrane // traceable author statement///0016021 // integral component of membrane // inferred from electronic annotation///00…	0004497 // monooxygenase activity // inferred from direct assay///0004497 // monooxygenase activity // inferred from sequence or structural similarity///0005496 // steroid binding // inferred from direct assay///0005506 // iron ion binding // inferred from direct assay///0008395 // steroid hydroxylase activity // inferred from mutant phenotype///0016491 // oxidoreductase activity // inferred from…	chr7:99354603-99381808 (-) // 89.83 // q22.1
205999_x_at	CYP3A4	1576	0006629 // lipid metabolic process // traceable author statement///0006706 // steroid catabolic process // inferred from mutant phenotype///0006805 // xenobiotic metabolic process // traceable author statement///0008202 // steroid metabolic process // inferred from mutant phenotype///0008209 // androgen metabolic process // traceable author statement///0009822 // alkaloid catabolic process // inf…	0005737 // cytoplasm // inferred from direct assay///0005783 // endoplasmic reticulum // inferred from electronic annotation///0005789 // endoplasmic reticulum membrane // traceable author statement///0016020 // membrane // inferred from electronic annotation///0016020 // membrane // traceable author statement///0016021 // integral component of membrane // inferred from electronic annotation///00…	0004497 // monooxygenase activity // inferred from direct assay///0004497 // monooxygenase activity // inferred from sequence or structural similarity///0005496 // steroid binding // inferred from direct assay///0005506 // iron ion binding // inferred from direct assay///0008395 // steroid hydroxylase activity // inferred from mutant phenotype///0016491 // oxidoreductase activity // inferred from…	chr7:99355572-99381713 (-) // 99.77 // q22.1
206011_at	CASP1	834	0001666 // response to hypoxia // inferred from electronic annotation///0006508 // proteolysis // inferred from direct assay///0006915 // apoptotic process // traceable author statement///0006919 // activation of cysteine-type endopeptidase activity involved in apoptotic process // traceable author statement///0007165 // signal transduction // traceable author statement///0009617 // response to b…	0005576 // extracellular region // inferred from electronic annotation///0005737 // cytoplasm // not recorded///0005739 // mitochondrion // inferred from electronic annotation///0005829 // cytosol // traceable author statement///0072557 // IPAF inflammasome complex // not recorded///0072557 // IPAF inflammasome complex // inferred from sequence or structural similarity///0072558 // NLRP1 inflamma…	0004175 // endopeptidase activity // inferred from direct assay///0004197 // cysteine-type endopeptidase activity // traceable author statement///0005515 // protein binding // inferred from physical interaction///0008233 // peptidase activity // inferred from electronic annotation///0008234 // cysteine-type peptidase activity // inferred from electronic annotation///0008656 // cysteine-type endop…	chr11:104896234-104905430 (-) // 86.78 // q22.3
206025_s_at	TNFAIP6	7130	0006954 // inflammatory response // traceable author statement///0007155 // cell adhesion // inferred from electronic annotation///0007165 // signal transduction // traceable author statement///0007267 // cell-cell signaling // traceable author statement///0030335 // positive regulation of cell migration // inferred from electronic annotation///0030728 // ovulation // inferred from electronic ann…	0005615 // extracellular space // inferred from electronic annotation	0005540 // hyaluronic acid binding // inferred from electronic annotation	chr2:152214105-152236553 (+) // 70.63 // q23.3
206026_s_at	TNFAIP6	7130	0006954 // inflammatory response // traceable author statement///0007155 // cell adhesion // inferred from electronic annotation///0007165 // signal transduction // traceable author statement///0007267 // cell-cell signaling // traceable author statement///0030335 // positive regulation of cell migration // inferred from electronic annotation///0030728 // ovulation // inferred from electronic ann…	0005615 // extracellular space // inferred from electronic annotation	0005540 // hyaluronic acid binding // inferred from electronic annotation	chr2:152214119-152236553 (+) // 69.45 // q23.3
206049_at	SELP	6403	0002576 // platelet degranulation // traceable author statement///0002687 // positive regulation of leukocyte migration // inferred from electronic annotation///0002691 // regulation of cellular extravasation // inferred from electronic annotation///0006954 // inflammatory response // inferred from electronic annotation///0007155 // cell adhesion // traceable author statement///0007157 // heterop…	0005615 // extracellular space // inferred from direct assay///0005654 // nucleoplasm // inferred from direct assay///0005737 // cytoplasm // inferred from direct assay///0005886 // plasma membrane // traceable author statement///0005887 // integral component of plasma membrane // traceable author statement///0009897 // external side of plasma membrane // inferred from direct assay///0016020 // m…	0001530 // lipopolysaccharide binding // inferred from mutant phenotype///0001948 // glycoprotein binding // inferred from electronic annotation///0005515 // protein binding // inferred from physical interaction///0008201 // heparin binding // inferred from direct assay///0030246 // carbohydrate binding // inferred from electronic annotation///0033691 // sialic acid binding // inferred from direc…	chr1:169558089-169599407 (-) // 99.78 // q24.2
206135_at	ST18	9705	0006351 // transcription, DNA-templated // inferred from electronic annotation///0006355 // regulation of transcription, DNA-templated // inferred from electronic annotation	0005634 // nucleus // inferred from electronic annotation	0003677 // DNA binding // inferred from electronic annotation///0003700 // transcription factor activity, sequence-specific DNA binding // inferred from electronic annotation///0008270 // zinc ion binding // inferred from electronic annotation///0046872 // metal ion binding // inferred from electronic annotation	chr8:53023398-53322303 (-) // 97.88 // q11.23
206151_x_at	CELA3B	23436	0006508 // proteolysis // inferred from electronic annotation///0008203 // cholesterol metabolic process // traceable author statement	0005615 // extracellular space // not recorded	0004252 // serine-type endopeptidase activity // non-traceable author statement///0008233 // peptidase activity // traceable author statement///0008236 // serine-type peptidase activity // inferred from electronic annotation///0016787 // hydrolase activity // inferred from electronic annotation	chr1:22303514-22315837 (+) // 100.0 // p36.12
206157_at	PTX3	5806	0001878 // response to yeast // inferred from electronic annotation///0006954 // inflammatory response // traceable author statement///0008228 // opsonization // inferred from electronic annotation///0044869 // negative regulation by host of viral exo-alpha-sialidase activity // inferred from direct assay///0044871 // negative regulation by host of viral glycoprotein metabolic process // inferred…	0005576 // extracellular region // traceable author statement///0005615 // extracellular space // inferred from direct assay	0001849 // complement component C1q binding // inferred from direct assay///0001872 // (1->3)-beta-D-glucan binding // inferred from electronic annotation///0046790 // virion binding // inferred from direct assay	chr3:157154655-157161376 (+) // 97.93 // q25.32
206170_at	ADRB2	154	0001666 // response to hypoxia // inferred from electronic annotation///0001889 // liver development // inferred from electronic annotation///0001993 // regulation of systemic arterial blood pressure by norepinephrine-epinephrine // inferred from electronic annotation///0002024 // diet induced thermogenesis // inferred from electronic annotation///0002025 // vasodilation by norepinephrine-epineph…	0005634 // nucleus // inferred from electronic annotation///0005737 // cytoplasm // inferred from electronic annotation///0005764 // lysosome // traceable author statement///0005768 // endosome // inferred from electronic annotation///0005886 // plasma membrane // inferred from direct assay///0005886 // plasma membrane // traceable author statement///0005887 // integral component of plasma membra…	0001965 // G-protein alpha-subunit binding // inferred from electronic annotation///0004871 // signal transducer activity // inferred from electronic annotation///0004930 // G-protein coupled receptor activity // inferred from electronic annotation///0004935 // adrenergic receptor activity // inferred from electronic annotation///0004941 // beta2-adrenergic receptor activity // inferred from dire…	chr5:148204807-148208254 (+) // 92.93 // q32
206204_at	GRB14	2888	0007165 // signal transduction // inferred from electronic annotation///0007596 // blood coagulation // traceable author statement///0009967 // positive regulation of signal transduction // inferred from electronic annotation///0050900 // leukocyte migration // traceable author statement	0000139 // Golgi membrane // inferred from electronic annotation///0005737 // cytoplasm // inferred from direct assay///0005768 // endosome // inferred from electronic annotation///0005794 // Golgi apparatus // inferred from electronic annotation///0005829 // cytosol // traceable author statement///0005886 // plasma membrane // inferred from direct assay///0010008 // endosome membrane // inferred…	0005070 // SH3/SH2 adaptor activity // inferred from electronic annotation///0005515 // protein binding // inferred from electronic annotation	chr2:165349332-165478358 (-) // 93.56 // q24.3
206211_at	SELE	6401	0002092 // positive regulation of receptor internalization // inferred from direct assay///0002523 // leukocyte migration involved in inflammatory response // traceable author statement///0002687 // positive regulation of leukocyte migration // inferred from electronic annotation///0006954 // inflammatory response // traceable author statement///0007155 // cell adhesion // inferred from electroni…	0005615 // extracellular space // inferred from direct assay///0005886 // plasma membrane // traceable author statement///0005901 // caveola // inferred from direct assay///0005905 // coated pit // inferred from direct assay///0016020 // membrane // inferred from electronic annotation///0016021 // integral component of membrane // inferred from electronic annotation///0030863 // cortical cytoskel…	0004888 // transmembrane signaling receptor activity // inferred from mutant phenotype///0005515 // protein binding // inferred from physical interaction///0030246 // carbohydrate binding // inferred from electronic annotation///0033691 // sialic acid binding // inferred from direct assay///0043274 // phospholipase binding // inferred from direct assay///0070492 // oligosaccharide binding // infe…	chr1:169691781-169703179 (-) // 98.41 // q24.2
206236_at	GPR4	2828	0007165 // signal transduction // inferred from electronic annotation///0007186 // G-protein coupled receptor signaling pathway // inferred from electronic annotation	0005886 // plasma membrane // traceable author statement///0005887 // integral component of plasma membrane // traceable author statement///0016020 // membrane // inferred from electronic annotation///0016021 // integral component of membrane // inferred from electronic annotation	0004871 // signal transducer activity // inferred from electronic annotation///0004930 // G-protein coupled receptor activity // inferred from electronic annotation	chr19:46093024-46095717 (-) // 83.68 // q13.32
206256_at	CPN1	1369	0006508 // proteolysis // inferred from electronic annotation///0006518 // peptide metabolic process // not recorded///0010815 // bradykinin catabolic process // inferred from electronic annotation///0016485 // protein processing // not recorded///0051384 // response to glucocorticoid // inferred from electronic annotation	0005576 // extracellular region // inferred from electronic annotation///0005615 // extracellular space // inferred from electronic annotation	0004180 // carboxypeptidase activity // inferred from electronic annotation///0004181 // metallocarboxypeptidase activity // inferred from electronic annotation///0004185 // serine-type carboxypeptidase activity // not recorded///0008233 // peptidase activity // inferred from electronic annotation///0008237 // metallopeptidase activity // inferred from electronic annotation///0008270 // zinc ion …	chr10:101802071-101841594 (-) // 99.94 // q24.2
206287_s_at	ITIH4	3700	0002062 // chondrocyte differentiation // inferred from electronic annotation///0006953 // acute-phase response // inferred from expression pattern///0010466 // negative regulation of peptidase activity // inferred from electronic annotation///0010951 // negative regulation of endopeptidase activity // inferred from electronic annotation///0010951 // negative regulation of endopeptidase activity …	0005576 // extracellular region // non-traceable author statement///0005634 // nucleus // inferred from electronic annotation///0005737 // cytoplasm // inferred from electronic annotation///0005886 // plasma membrane // inferred from electronic annotation///0070062 // extracellular exosome // inferred from direct assay///0072562 // blood microparticle // inferred from direct assay	0004866 // endopeptidase inhibitor activity // traceable author statement///0004867 // serine-type endopeptidase inhibitor activity // inferred from electronic annotation///0005515 // protein binding // inferred from physical interaction///0030414 // peptidase inhibitor activity // inferred from electronic annotation	chr3:52847299-52864688 (-) // 99.7 // p21.1
206295_at	IL18	3606	0000165 // MAPK cascade // inferred from mutant phenotype///0001525 // angiogenesis // inferred from direct assay///0006954 // inflammatory response // inferred from direct assay///0006955 // immune response // traceable author statement///0007267 // cell-cell signaling // traceable author statement///0010628 // positive regulation of gene expression // inferred from electronic annotation///00301…	0005576 // extracellular region // traceable author statement///0005615 // extracellular space // not recorded///0005829 // cytosol // traceable author statement///0070062 // extracellular exosome // inferred from direct assay	0005125 // cytokine activity // traceable author statement///0005515 // protein binding // inferred from physical interaction	chr11:112013975-112034797 (-) // 71.51 // q23.1
206344_at	PON1	5444	0006470 // protein dephosphorylation // inferred from electronic annotation///0006629 // lipid metabolic process // inferred from electronic annotation///0009605 // response to external stimulus // non-traceable author statement///0009636 // response to toxic substance // not recorded///0010875 // positive regulation of cholesterol efflux // inferred from direct assay///0016311 // dephosphorylati…	0005576 // extracellular region // non-traceable author statement///0005615 // extracellular space // inferred from direct assay///0034364 // high-density lipoprotein particle // inferred from direct assay///0034364 // high-density lipoprotein particle // traceable author statement///0034366 // spherical high-density lipoprotein particle // inferred from direct assay///0043231 // intracellular me…	0004063 // aryldialkylphosphatase activity // inferred from direct assay///0004064 // arylesterase activity // inferred from direct assay///0004064 // arylesterase activity // non-traceable author statement///0005509 // calcium ion binding // inferred from direct assay///0005543 // phospholipid binding // inferred from direct assay///0016787 // hydrolase activity // inferred from electronic annot…	chr7:94926987-94953834 (-) // 93.19 // q21.3
206345_s_at	PON1	5444	0006470 // protein dephosphorylation // inferred from electronic annotation///0006629 // lipid metabolic process // inferred from electronic annotation///0009605 // response to external stimulus // non-traceable author statement///0009636 // response to toxic substance // not recorded///0010875 // positive regulation of cholesterol efflux // inferred from direct assay///0016311 // dephosphorylati…	0005576 // extracellular region // non-traceable author statement///0005615 // extracellular space // inferred from direct assay///0034364 // high-density lipoprotein particle // inferred from direct assay///0034364 // high-density lipoprotein particle // traceable author statement///0034366 // spherical high-density lipoprotein particle // inferred from direct assay///0043231 // intracellular me…	0004063 // aryldialkylphosphatase activity // inferred from direct assay///0004064 // arylesterase activity // inferred from direct assay///0004064 // arylesterase activity // non-traceable author statement///0005509 // calcium ion binding // inferred from direct assay///0005543 // phospholipid binding // inferred from direct assay///0016787 // hydrolase activity // inferred from electronic annot…	chr7:94927995-94953795 (-) // 99.18 // q21.3
206362_x_at	MAP3K10	4294	0000165 // MAPK cascade // inferred from electronic annotation///0000186 // activation of MAPKK activity // inferred from electronic annotation///0006468 // protein phosphorylation // inferred from electronic annotation///0006915 // apoptotic process // traceable author statement///0007165 // signal transduction // traceable author statement///0007224 // smoothened signaling pathway // inferred f…	0005622 // intracellular // inferred from electronic annotation///0005737 // cytoplasm // inferred from direct assay	0000166 // nucleotide binding // inferred from electronic annotation///0003714 // transcription corepressor activity // inferred from sequence or structural similarity///0004672 // protein kinase activity // traceable author statement///0004674 // protein serine/threonine kinase activity // inferred from direct assay///0004706 // JUN kinase kinase kinase activity // inferred from sequence or stru…	chr19:40697777-40721315 (+) // 94.74 // q13.2
206369_s_at	PIK3CG	5294	0001525 // angiogenesis // inferred from electronic annotation///0001816 // cytokine production // traceable author statement///0001932 // regulation of protein phosphorylation // inferred from electronic annotation///0002250 // adaptive immune response // traceable author statement///0002376 // immune system process // inferred from electronic annotation///0002407 // dendritic cell chemotaxis //…	0005622 // intracellular // inferred from electronic annotation///0005737 // cytoplasm // inferred from direct assay///0005829 // cytosol // traceable author statement///0005886 // plasma membrane // not recorded///0005942 // phosphatidylinositol 3-kinase complex // inferred from electronic annotation///0005944 // phosphatidylinositol 3-kinase complex, class IB // inferred from direct assay///001…	0000166 // nucleotide binding // inferred from electronic annotation///0004672 // protein kinase activity // traceable author statement///0004674 // protein serine/threonine kinase activity // inferred from electronic annotation///0005488 // binding // inferred from electronic annotation///0005515 // protein binding // inferred from physical interaction///0005524 // ATP binding // inferred from e…	chr7:106508006-106545933 (+) // 98.39 // q22.3
206370_at	PIK3CG	5294	0001525 // angiogenesis // inferred from electronic annotation///0001816 // cytokine production // traceable author statement///0001932 // regulation of protein phosphorylation // inferred from electronic annotation///0002250 // adaptive immune response // traceable author statement///0002376 // immune system process // inferred from electronic annotation///0002407 // dendritic cell chemotaxis //…	0005622 // intracellular // inferred from electronic annotation///0005737 // cytoplasm // inferred from direct assay///0005829 // cytosol // traceable author statement///0005886 // plasma membrane // not recorded///0005942 // phosphatidylinositol 3-kinase complex // inferred from electronic annotation///0005944 // phosphatidylinositol 3-kinase complex, class IB // inferred from direct assay///001…	0000166 // nucleotide binding // inferred from electronic annotation///0004672 // protein kinase activity // traceable author statement///0004674 // protein serine/threonine kinase activity // inferred from electronic annotation///0005488 // binding // inferred from electronic annotation///0005515 // protein binding // inferred from physical interaction///0005524 // ATP binding // inferred from e…	chr7:106505923-106547590 (+) // 92.14 // q22.3
206405_x_at	USP6	9098	0006464 // cellular protein modification process // non-traceable author statement///0006508 // proteolysis // inferred from electronic annotation///0006511 // ubiquitin-dependent protein catabolic process // inferred from electronic annotation///0016579 // protein deubiquitination // inferred from direct assay///0043161 // proteasome-mediated ubiquitin-dependent protein catabolic process // not …	0005737 // cytoplasm // inferred from direct assay///0005764 // lysosome // traceable author statement///0005768 // endosome // inferred from electronic annotation///0005886 // plasma membrane // inferred from direct assay///0016020 // membrane // inferred from electronic annotation///0055037 // recycling endosome // inferred from direct assay	0003676 // nucleic acid binding // traceable author statement///0004197 // cysteine-type endopeptidase activity // traceable author statement///0004843 // ubiquitin-specific protease activity // inferred from direct assay///0005515 // protein binding // inferred from physical interaction///0005516 // calmodulin binding // inferred from physical interaction///0008233 // peptidase activity // infer…	chr17:5031686-5078324 (+) // 97.51 // p13.2
206480_at	LTC4S	4056	0006691 // leukotriene metabolic process // inferred from direct assay///0006691 // leukotriene metabolic process // traceable author statement///0010035 // response to inorganic substance // inferred from electronic annotation///0019369 // arachidonic acid metabolic process // traceable author statement///0019370 // leukotriene biosynthetic process // not recorded///0019372 // lipoxygenase pathw…	0005634 // nucleus // inferred from electronic annotation///0005635 // nuclear envelope // inferred from direct assay///0005635 // nuclear envelope // traceable author statement///0005640 // nuclear outer membrane // inferred from electronic annotation///0005783 // endoplasmic reticulum // inferred from direct assay///0005789 // endoplasmic reticulum membrane // inferred from electronic annotatio…	0004364 // glutathione transferase activity // not recorded///0004464 // leukotriene-C4 synthase activity // inferred from direct assay///0004602 // glutathione peroxidase activity // not recorded///0005515 // protein binding // inferred from physical interaction///0008047 // enzyme activator activity // inferred from electronic annotation///0008289 // lipid binding // inferred from direct assay/…	chr5:179220985-179223511 (+) // 100.0 // q35.3
206513_at	AIM2	9447	0002218 // activation of innate immune response // inferred from direct assay///0002230 // positive regulation of defense response to virus by host // inferred from sequence or structural similarity///0002376 // immune system process // inferred from electronic annotation///0006915 // apoptotic process // inferred from electronic annotation///0006954 // inflammatory response // inferred from elec…	0005634 // nucleus // inferred from electronic annotation///0005737 // cytoplasm // inferred from direct assay///0005829 // cytosol // traceable author statement///0097169 // AIM2 inflammasome complex // inferred from direct assay	0003677 // DNA binding // inferred from electronic annotation///0003690 // double-stranded DNA binding // inferred from direct assay///0005515 // protein binding // inferred from physical interaction///0042802 // identical protein binding // inferred from physical interaction	chr1:159032274-159046647 (-) // 94.68 // q23.1
206582_s_at	ADGRG1	9289	0001525 // angiogenesis // inferred from direct assay///0007155 // cell adhesion // inferred from electronic annotation///0007165 // signal transduction // inferred from electronic annotation///0007166 // cell surface receptor signaling pathway // inferred from electronic annotation///0007186 // G-protein coupled receptor signaling pathway // inferred from electronic annotation///0007266 // Rho p…	0005576 // extracellular region // inferred from electronic annotation///0005622 // intracellular // inferred from direct assay///0005886 // plasma membrane // inferred from electronic annotation///0005887 // integral component of plasma membrane // traceable author statement///0016020 // membrane // inferred from electronic annotation///0016021 // integral component of membrane // traceable auth…	0004871 // signal transducer activity // inferred from electronic annotation///0004888 // transmembrane signaling receptor activity // inferred from electronic annotation///0004930 // G-protein coupled receptor activity // inferred from sequence or structural similarity///0005518 // collagen binding // inferred from sequence or structural similarity///0050840 // extracellular matrix binding // in…	chr16:57683709-57698070 (+) // 95.18 // q21
206637_at	P2RY14	9934	0007165 // signal transduction // inferred from electronic annotation///0007186 // G-protein coupled receptor signaling pathway // not recorded///0007186 // G-protein coupled receptor signaling pathway // non-traceable author statement///0035589 // G-protein coupled purinergic nucleotide receptor signaling pathway // not recorded///0035589 // G-protein coupled purinergic nucleotide receptor signa…	0005886 // plasma membrane // traceable author statement///0005887 // integral component of plasma membrane // not recorded///0016020 // membrane // inferred from electronic annotation///0016021 // integral component of membrane // non-traceable author statement	0004871 // signal transducer activity // inferred from electronic annotation///0004930 // G-protein coupled receptor activity // inferred from electronic annotation///0045028 // G-protein coupled purinergic nucleotide receptor activity // not recorded///0045029 // UDP-activated nucleotide receptor activity // non-traceable author statement	chr3:150929904-150996157 (-) // 97.6 // q25.1
206676_at	CEACAM8	1088	0006955 // immune response // traceable author statement///0007596 // blood coagulation // traceable author statement///0050900 // leukocyte migration // traceable author statement	0005615 // extracellular space // inferred from direct assay///0005886 // plasma membrane // traceable author statement///0005887 // integral component of plasma membrane // traceable author statement///0016020 // membrane // inferred from electronic annotation///0031225 // anchored component of membrane // inferred from electronic annotation///0070062 // extracellular exosome // inferred from di…	0005515 // protein binding // inferred from electronic annotation	chr19:43084395-43099066 (-) // 58.72 // q13.2
206680_at	CD5L	922	0006898 // receptor-mediated endocytosis // inferred from electronic annotation///0006915 // apoptotic process // inferred from electronic annotation///0006968 // cellular defense response // traceable author statement	0005576 // extracellular region // non-traceable author statement///0005615 // extracellular space // traceable author statement///0016020 // membrane // inferred from electronic annotation///0070062 // extracellular exosome // inferred from direct assay///0072562 // blood microparticle // inferred from direct assay	0005044 // scavenger receptor activity // inferred from electronic annotation	chr1:157800703-157811551 (-) // 98.58 // q23.1
206687_s_at	PTPN6	5777	0002244 // hematopoietic progenitor cell differentiation // inferred from electronic annotation///0002924 // negative regulation of humoral immune response mediated by circulating immunoglobulin // inferred from electronic annotation///0006470 // protein dephosphorylation // inferred from direct assay///0006915 // apoptotic process // traceable author statement///0007186 // G-protein coupled rece…	0005634 // nucleus // inferred from direct assay///0005730 // nucleolus // inferred from direct assay///0005737 // cytoplasm // inferred from direct assay///0005829 // cytosol // traceable author statement///0005911 // cell-cell junction // inferred from electronic annotation///0016020 // membrane // traceable author statement///0042105 // alpha-beta T cell receptor complex // inferred from elect…	0001784 // phosphotyrosine binding // inferred from electronic annotation///0004721 // phosphoprotein phosphatase activity // inferred from electronic annotation///0004725 // protein tyrosine phosphatase activity // traceable author statement///0005001 // transmembrane receptor protein tyrosine phosphatase activity // inferred from direct assay///0005515 // protein binding // inferred from physic…	chr12:7060534-7070476 (+) // 99.67 // p13.31
206812_at	ADRB3	155	0001659 // temperature homeostasis // not recorded///0002024 // diet induced thermogenesis // inferred from electronic annotation///0002025 // vasodilation by norepinephrine-epinephrine involved in regulation of systemic arterial blood pressure // not recorded///0002032 // desensitization of G-protein coupled receptor protein signaling pathway by arrestin // inferred from direct assay///0005975 /…	0005634 // nucleus // inferred from electronic annotation///0005886 // plasma membrane // traceable author statement///0005887 // integral component of plasma membrane // traceable author statement///0016020 // membrane // inferred from electronic annotation///0016021 // integral component of membrane // inferred from electronic annotation///0043235 // receptor complex // inferred from direct ass…	0004871 // signal transducer activity // inferred from electronic annotation///0004930 // G-protein coupled receptor activity // inferred from electronic annotation///0004935 // adrenergic receptor activity // inferred from electronic annotation///0004939 // beta-adrenergic receptor activity // inferred from direct assay///0005515 // protein binding // inferred from physical interaction///0015052…	chr8:37820515-37824184 (-) // 96.48 // p11.23
206885_x_at	GH1	2688	0002092 // positive regulation of receptor internalization // inferred from direct assay///0007259 // JAK-STAT cascade // inferred from direct assay///0010535 // positive regulation of activation of JAK2 kinase activity // inferred from direct assay///0014068 // positive regulation of phosphatidylinositol 3-kinase signaling // inferred from direct assay///0015758 // glucose transport // inferred …	0005576 // extracellular region // traceable author statement///0005615 // extracellular space // inferred from direct assay///0005622 // intracellular // inferred from direct assay///0005622 // intracellular // traceable author statement	0005131 // growth hormone receptor binding // inferred from direct assay///0005131 // growth hormone receptor binding // inferred from physical interaction///0005148 // prolactin receptor binding // inferred from direct assay///0005148 // prolactin receptor binding // inferred from physical interaction///0005179 // hormone activity // inferred from electronic annotation///0005515 // protein bindi…	chr17:61994562-61996198 (-) // 99.87 // q23.3
206886_x_at	GH1	2688	0002092 // positive regulation of receptor internalization // inferred from direct assay///0007259 // JAK-STAT cascade // inferred from direct assay///0010535 // positive regulation of activation of JAK2 kinase activity // inferred from direct assay///0014068 // positive regulation of phosphatidylinositol 3-kinase signaling // inferred from direct assay///0015758 // glucose transport // inferred …	0005576 // extracellular region // traceable author statement///0005615 // extracellular space // inferred from direct assay///0005622 // intracellular // inferred from direct assay///0005622 // intracellular // traceable author statement	0005131 // growth hormone receptor binding // inferred from direct assay///0005131 // growth hormone receptor binding // inferred from physical interaction///0005148 // prolactin receptor binding // inferred from direct assay///0005148 // prolactin receptor binding // inferred from physical interaction///0005179 // hormone activity // inferred from electronic annotation///0005515 // protein bindi…	chr17:61994562-61996198 (-) // 99.86 // q23.3///chr17:61957574-61959223 (-) // 95.72 // q23.3
206934_at	SIRPB1	10326	0007165 // signal transduction // traceable author statement///0007166 // cell surface receptor signaling pathway // traceable author statement///0045087 // innate immune response // traceable author statement	0005886 // plasma membrane // traceable author statement///0005887 // integral component of plasma membrane // traceable author statement///0016020 // membrane // inferred from electronic annotation///0016021 // integral component of membrane // inferred from electronic annotation///0070062 // extracellular exosome // inferred from direct assay	0005515 // protein binding // inferred from physical interaction	chr20:1544428-1600630 (-) // 53.97 // p13
206938_at	SRD5A2	6716	0006629 // lipid metabolic process // inferred from electronic annotation///0006694 // steroid biosynthetic process // inferred from electronic annotation///0006702 // androgen biosynthetic process // traceable author statement///0006706 // steroid catabolic process // inferred from electronic annotation///0007267 // cell-cell signaling // traceable author statement///0007548 // sex differentiati…	0005737 // cytoplasm // inferred from electronic annotation///0005783 // endoplasmic reticulum // inferred from electronic annotation///0005789 // endoplasmic reticulum membrane // traceable author statement///0016020 // membrane // inferred from electronic annotation///0016021 // integral component of membrane // inferred from electronic annotation///0031090 // organelle membrane // inferred fro…	0003865 // 3-oxo-5-alpha-steroid 4-dehydrogenase activity // inferred from electronic annotation///0009917 // sterol 5-alpha reductase activity // inferred from direct assay///0016491 // oxidoreductase activity // inferred from electronic annotation///0016627 // oxidoreductase activity, acting on the CH-CH group of donors // inferred from electronic annotation///0033218 // amide binding // inferr…	chr2:31749655-31806040 (-) // 90.17 // p23.1
206955_at	AQP7	364	0006091 // generation of precursor metabolites and energy // traceable author statement///0006810 // transport // inferred from electronic annotation///0006833 // water transport // traceable author statement///0007588 // excretion // traceable author statement///0009992 // cellular water homeostasis // not recorded///0015793 // glycerol transport // traceable author statement///0034220 // ion tr…	0005623 // cell // ---///0005737 // cytoplasm // inferred from direct assay///0005886 // plasma membrane // inferred from direct assay///0005886 // plasma membrane // traceable author statement///0005887 // integral component of plasma membrane // traceable author statement///0005911 // cell-cell junction // inferred from direct assay///0016020 // membrane // inferred from electronic annotation//…	0005215 // transporter activity // inferred from electronic annotation///0015204 // urea transmembrane transporter activity // not recorded///0015250 // water channel activity // traceable author statement///0015254 // glycerol channel activity // not recorded	chr9:33384947-33402517 (-) // 99.84 // p13.3
206965_at	KLF12	11278	0000122 // negative regulation of transcription from RNA polymerase II promoter // inferred from direct assay///0006351 // transcription, DNA-templated // inferred from electronic annotation///0006355 // regulation of transcription, DNA-templated // inferred from electronic annotation///0006357 // regulation of transcription from RNA polymerase II promoter // traceable author statement///0045944 …	0005634 // nucleus // inferred from electronic annotation///0005654 // nucleoplasm // inferred from direct assay///0005737 // cytoplasm // inferred from direct assay	0000977 // RNA polymerase II regulatory region sequence-specific DNA binding // inferred from electronic annotation///0001227 // transcriptional repressor activity, RNA polymerase II transcription regulatory region sequence-specific binding // inferred from electronic annotation///0003676 // nucleic acid binding // inferred from electronic annotation///0003677 // DNA binding // inferred from dire…	chr13:74387022-74708042 (-) // 93.15 // q22.1
206966_s_at	KLF12	11278	0000122 // negative regulation of transcription from RNA polymerase II promoter // inferred from direct assay///0006351 // transcription, DNA-templated // inferred from electronic annotation///0006355 // regulation of transcription, DNA-templated // inferred from electronic annotation///0006357 // regulation of transcription from RNA polymerase II promoter // traceable author statement///0045944 …	0005634 // nucleus // inferred from electronic annotation///0005654 // nucleoplasm // inferred from direct assay///0005737 // cytoplasm // inferred from direct assay	0000977 // RNA polymerase II regulatory region sequence-specific DNA binding // inferred from electronic annotation///0001227 // transcriptional repressor activity, RNA polymerase II transcription regulatory region sequence-specific binding // inferred from electronic annotation///0003676 // nucleic acid binding // inferred from electronic annotation///0003677 // DNA binding // inferred from dire…	chr13:74387022-74708042 (-) // 93.15 // q22.1
206975_at	LTA	4049	0001666 // response to hypoxia // inferred from electronic annotation///0002876 // positive regulation of chronic inflammatory response to antigenic stimulus // inferred from electronic annotation///0002925 // positive regulation of humoral immune response mediated by circulating immunoglobulin // inferred from electronic annotation///0006915 // apoptotic process // traceable author statement///0…	0005576 // extracellular region // inferred from electronic annotation///0005615 // extracellular space // inferred from electronic annotation///0005886 // plasma membrane // traceable author statement///0016020 // membrane // inferred from electronic annotation	0005102 // receptor binding // traceable author statement///0005125 // cytokine activity // inferred from electronic annotation///0005164 // tumor necrosis factor receptor binding // inferred from electronic annotation///0005515 // protein binding // inferred from electronic annotation	chr6:31540092-31542098 (+) // 98.27 // p21.33
206978_at	CCR2	729230	0001974 // blood vessel remodeling // inferred from sequence or structural similarity///0002407 // dendritic cell chemotaxis // traceable author statement///0002827 // positive regulation of T-helper 1 type immune response // inferred from sequence or structural similarity///0002829 // negative regulation of type 2 immune response // inferred from sequence or structural similarity///0006874 // ce…	0005737 // cytoplasm // inferred from direct assay///0005829 // cytosol // inferred from sequence or structural similarity///0005886 // plasma membrane // inferred from direct assay///0005886 // plasma membrane // traceable author statement///0005887 // integral component of plasma membrane // traceable author statement///0016020 // membrane // inferred from electronic annotation///0016021 // int…	0004871 // signal transducer activity // inferred from electronic annotation///0004930 // G-protein coupled receptor activity // inferred from electronic annotation///0004950 // chemokine receptor activity // traceable author statement///0005515 // protein binding // inferred from physical interaction///0016493 // C-C chemokine receptor activity // inferred from electronic annotation///0031727 //…	chr3:46398979-46402419 (+) // 93.37 // p21.31
206988_at	CCL25	6370	0001954 // positive regulation of cell-matrix adhesion // inferred from direct assay///0002548 // monocyte chemotaxis // not recorded///0006935 // chemotaxis // traceable author statement///0006954 // inflammatory response // not recorded///0006955 // immune response // traceable author statement///0007166 // cell surface receptor signaling pathway // traceable author statement///0007186 // G-pro…	0005576 // extracellular region // traceable author statement///0005615 // extracellular space // not recorded	0005125 // cytokine activity // inferred from electronic annotation///0005179 // hormone activity // traceable author statement///0008009 // chemokine activity // inferred from direct assay///0031735 // CCR10 chemokine receptor binding // inferred from direct assay///0042379 // chemokine receptor binding // inferred from direct assay	chr19:8117933-8127530 (+) // 84.64 // p13.2
206991_s_at	CCR5	1234	0000165 // MAPK cascade // inferred from expression pattern///0002407 // dendritic cell chemotaxis // traceable author statement///0006816 // calcium ion transport // inferred from direct assay///0006935 // chemotaxis // traceable author statement///0006954 // inflammatory response // inferred from electronic annotation///0006955 // immune response // inferred from electronic annotation///0006968…	0005737 // cytoplasm // traceable author statement///0005768 // endosome // inferred from direct assay///0005829 // cytosol // traceable author statement///0005886 // plasma membrane // traceable author statement///0005887 // integral component of plasma membrane // traceable author statement///0009897 // external side of plasma membrane // inferred from direct assay///0009986 // cell surface // …	0001618 // virus receptor activity // inferred from electronic annotation///0003779 // actin binding // inferred from direct assay///0004435 // phosphatidylinositol phospholipase C activity // traceable author statement///0004871 // signal transducer activity // inferred from electronic annotation///0004930 // G-protein coupled receptor activity // inferred from electronic annotation///0004950 //…	chr3:46411632-46417691 (+) // 97.07 // p21.31
207015_s_at	ALDH1A2	8854	0001568 // blood vessel development // inferred from electronic annotation///0001822 // kidney development // inferred from electronic annotation///0001889 // liver development // inferred from electronic annotation///0001936 // regulation of endothelial cell proliferation // inferred from electronic annotation///0002138 // retinoic acid biosynthetic process // inferred from electronic annotation…	0005737 // cytoplasm // inferred from direct assay///0005829 // cytosol // traceable author statement///0048471 // perinuclear region of cytoplasm // inferred from electronic annotation	0001758 // retinal dehydrogenase activity // not recorded///0001758 // retinal dehydrogenase activity // inferred from sequence or structural similarity///0004028 // 3-chloroallyl aldehyde dehydrogenase activity // not recorded///0004028 // 3-chloroallyl aldehyde dehydrogenase activity // inferred from sequence or structural similarity///0004029 // aldehyde dehydrogenase (NAD) activity // not rec…	chr15:58247364-58357891 (-) // 99.94 // q21.3
207016_s_at	ALDH1A2	8854	0001568 // blood vessel development // inferred from electronic annotation///0001822 // kidney development // inferred from electronic annotation///0001889 // liver development // inferred from electronic annotation///0001936 // regulation of endothelial cell proliferation // inferred from electronic annotation///0002138 // retinoic acid biosynthetic process // inferred from electronic annotation…	0005737 // cytoplasm // inferred from direct assay///0005829 // cytosol // traceable author statement///0048471 // perinuclear region of cytoplasm // inferred from electronic annotation	0001758 // retinal dehydrogenase activity // not recorded///0001758 // retinal dehydrogenase activity // inferred from sequence or structural similarity///0004028 // 3-chloroallyl aldehyde dehydrogenase activity // not recorded///0004028 // 3-chloroallyl aldehyde dehydrogenase activity // inferred from sequence or structural similarity///0004029 // aldehyde dehydrogenase (NAD) activity // not rec…	chr15:58245628-58306186 (-) // 99.94 // q21.3
207075_at	NLRP3	114548	0002376 // immune system process // inferred from electronic annotation///0002674 // negative regulation of acute inflammatory response // inferred from mutant phenotype///0002830 // positive regulation of type 2 immune response // inferred from sequence or structural similarity///0006351 // transcription, DNA-templated // inferred from electronic annotation///0006355 // regulation of transcripti…	0005576 // extracellular region // inferred from electronic annotation///0005623 // cell // inferred from electronic annotation///0005634 // nucleus // inferred from sequence or structural similarity///0005737 // cytoplasm // inferred from direct assay///0005737 // cytoplasm // traceable author statement///0005783 // endoplasmic reticulum // inferred from electronic annotation///0005829 // cytoso…	0000166 // nucleotide binding // inferred from electronic annotation///0005515 // protein binding // inferred from physical interaction///0005524 // ATP binding // inferred from electronic annotation///0008134 // transcription factor binding // inferred from sequence or structural similarity///0042834 // peptidoglycan binding // traceable author statement///0043565 // sequence-specific DNA bindin…	chr1:247587920-247612404 (+) // 92.61 // q44
207082_at	CSF1	1435	0001954 // positive regulation of cell-matrix adhesion // inferred from sequence or structural similarity///0002158 // osteoclast proliferation // inferred from electronic annotation///0002376 // immune system process // inferred from electronic annotation///0003006 // developmental process involved in reproduction // inferred from sequence or structural similarity///0006954 // inflammatory respo…	0005576 // extracellular region // inferred from electronic annotation///0005615 // extracellular space // inferred from direct assay///0005886 // plasma membrane // inferred from electronic annotation///0016020 // membrane // non-traceable author statement///0016021 // integral component of membrane // inferred from electronic annotation///0048471 // perinuclear region of cytoplasm // inferred f…	0005125 // cytokine activity // inferred from direct assay///0005157 // macrophage colony-stimulating factor receptor binding // inferred from sequence or structural similarity///0005157 // macrophage colony-stimulating factor receptor binding // traceable author statement///0005515 // protein binding // inferred from physical interaction///0008083 // growth factor activity // inferred from direc…	chr1:110453521-110467824 (+) // 70.59 // p13.3
207092_at	LEP	3952	0000122 // negative regulation of transcription from RNA polymerase II promoter // inferred from electronic annotation///0001542 // ovulation from ovarian follicle // inferred from electronic annotation///0001666 // response to hypoxia // inferred from electronic annotation///0001819 // positive regulation of cytokine production // inferred from electronic annotation///0001890 // placenta develop…	0005576 // extracellular region // traceable author statement///0005615 // extracellular space // inferred from sequence or structural similarity///0005737 // cytoplasm // inferred from electronic annotation	0005179 // hormone activity // inferred from electronic annotation///0005515 // protein binding // inferred from electronic annotation///0008083 // growth factor activity // inferred from electronic annotation///0051428 // peptide hormone receptor binding // inferred from electronic annotation	chr7:127892041-127897681 (+) // 83.25 // q32.1
207096_at	SAA4	6291	0000187 // activation of MAPK activity // inferred from direct assay///0006898 // receptor-mediated endocytosis // traceable author statement///0006953 // acute-phase response // inferred from electronic annotation///0007204 // positive regulation of cytosolic calcium ion concentration // inferred from direct assay///0007204 // positive regulation of cytosolic calcium ion concentration // non-tra…	0005576 // extracellular region // non-traceable author statement///0005615 // extracellular space // not recorded///0005829 // cytosol // inferred from direct assay///0005829 // cytosol // non-traceable author statement///0005881 // cytoplasmic microtubule // inferred from direct assay///0034364 // high-density lipoprotein particle // inferred from electronic annotation///0070062 // extracellula…	0001664 // G-protein coupled receptor binding // inferred from direct assay///0008201 // heparin binding // inferred from electronic annotation///0042056 // chemoattractant activity // not recorded	chr11:18252902-18258334 (-) // 80.29 // p15.1
207133_x_at	ALPK1	80216	0002230 // positive regulation of defense response to virus by host // inferred from mutant phenotype///0006468 // protein phosphorylation // inferred from electronic annotation///0016310 // phosphorylation // inferred from electronic annotation///0098779 // mitophagy in response to mitochondrial depolarization // inferred from genetic interaction///0098792 // xenophagy // inferred from mutant ph…		0004674 // protein serine/threonine kinase activity // inferred from electronic annotation///0005524 // ATP binding // inferred from electronic annotation///0016301 // kinase activity // inferred from electronic annotation///0016740 // transferase activity // inferred from electronic annotation	chr4:113218525-113335719 (+) // 52.28 // q25
207163_s_at	AKT1	207	0000060 // protein import into nucleus, translocation // inferred from mutant phenotype///0001649 // osteoblast differentiation // inferred from electronic annotation///0001893 // maternal placenta development // inferred from electronic annotation///0001934 // positive regulation of protein phosphorylation // inferred from direct assay///0001938 // positive regulation of endothelial cell prolife…	0005634 // nucleus // inferred from direct assay///0005634 // nucleus // traceable author statement///0005654 // nucleoplasm // traceable author statement///0005737 // cytoplasm // inferred from direct assay///0005737 // cytoplasm // inferred from sequence or structural similarity///0005737 // cytoplasm // traceable author statement///0005739 // mitochondrion // inferred from electronic annotatio…	0000166 // nucleotide binding // inferred from electronic annotation///0004672 // protein kinase activity // traceable author statement///0004674 // protein serine/threonine kinase activity // inferred from direct assay///0004674 // protein serine/threonine kinase activity // traceable author statement///0004712 // protein serine/threonine/tyrosine kinase activity // inferred from direct assay///…	chr14:105235707-105259582 (-) // 99.5 // q32.33
207167_at	CD101	9398	0002763 // positive regulation of myeloid leukocyte differentiation // inferred from electronic annotation///0007166 // cell surface receptor signaling pathway // traceable author statement///0008152 // metabolic process // inferred from electronic annotation	0005886 // plasma membrane // traceable author statement///0016020 // membrane // inferred from electronic annotation///0016021 // integral component of membrane // inferred from electronic annotation///0070062 // extracellular exosome // inferred from direct assay	0005515 // protein binding // inferred from electronic annotation///0016812 // hydrolase activity, acting on carbon-nitrogen (but not peptide) bonds, in cyclic amides // inferred from electronic annotation	chr1:117544433-117576756 (+) // 92.22 // p13.1
207195_at	CNTN6	27255	0007155 // cell adhesion // inferred from electronic annotation///0007219 // Notch signaling pathway // inferred from electronic annotation///0007411 // axon guidance // traceable author statement///0007417 // central nervous system development // traceable author statement	0005886 // plasma membrane // inferred from electronic annotation///0016020 // membrane // inferred from electronic annotation///0031225 // anchored component of membrane // inferred from electronic annotation	0005515 // protein binding // inferred from electronic annotation	chr3:1134628-1445278 (+) // 99.97 // p26.3
207249_s_at	SLC28A2	9153	0006139 // nucleobase-containing compound metabolic process // traceable author statement///0006810 // transport // inferred from electronic annotation///0015860 // purine nucleoside transmembrane transport // traceable author statement///0055085 // transmembrane transport // traceable author statement///1901642 // nucleoside transmembrane transport // inferred from electronic annotation	0005886 // plasma membrane // traceable author statement///0005887 // integral component of plasma membrane // inferred from electronic annotation///0016020 // membrane // traceable author statement///0016021 // integral component of membrane // inferred from electronic annotation	0001882 // nucleoside binding // inferred from electronic annotation///0005337 // nucleoside transmembrane transporter activity // inferred from electronic annotation///0005415 // nucleoside:sodium symporter activity // not recorded///0015211 // purine nucleoside transmembrane transporter activity // traceable author statement	chr15:45544433-45568133 (+) // 88.37 // q21.1
207251_at	MEP1B	4225	0006508 // proteolysis // inferred from electronic annotation///0006954 // inflammatory response // inferred from electronic annotation///0007586 // digestion // traceable author statement///1901998 // toxin transport // inferred from electronic annotation	0005576 // extracellular region // inferred from electronic annotation///0005615 // extracellular space // traceable author statement///0005886 // plasma membrane // traceable author statement///0005887 // integral component of plasma membrane // traceable author statement///0016020 // membrane // inferred from electronic annotation///0016021 // integral component of membrane // inferred from ele…	0004222 // metalloendopeptidase activity // inferred from electronic annotation///0005515 // protein binding // inferred from physical interaction///0008233 // peptidase activity // inferred from electronic annotation///0008237 // metallopeptidase activity // inferred from electronic annotation///0008270 // zinc ion binding // inferred from electronic annotation///0016787 // hydrolase activity //…	chr18:29769987-29800364 (+) // 99.01 // q12.1
207262_at	APOF	319	0006629 // lipid metabolic process // traceable author statement///0006641 // triglyceride metabolic process // inferred from electronic annotation///0006810 // transport // inferred from electronic annotation///0006869 // lipid transport // inferred from electronic annotation///0008202 // steroid metabolic process // inferred from electronic annotation///0008203 // cholesterol metabolic process …	0005576 // extracellular region // non-traceable author statement///0034362 // low-density lipoprotein particle // inferred from electronic annotation///0034364 // high-density lipoprotein particle // inferred from electronic annotation	0005102 // receptor binding // traceable author statement///0005319 // lipid transporter activity // traceable author statement///0015485 // cholesterol binding // traceable author statement	chr12:56754454-56756569 (-) // 66.03 // q13.3
207289_at	MMP25	64386	0006508 // proteolysis // non-traceable author statement///0006954 // inflammatory response // non-traceable author statement///0060022 // hard palate development // inferred from electronic annotation	0005576 // extracellular region // inferred from electronic annotation///0005578 // proteinaceous extracellular matrix // non-traceable author statement///0005886 // plasma membrane // inferred from electronic annotation///0016020 // membrane // non-traceable author statement///0016021 // integral component of membrane // inferred from electronic annotation///0031012 // extracellular matrix // in…	0004222 // metalloendopeptidase activity // inferred from electronic annotation///0005509 // calcium ion binding // inferred from electronic annotation///0008233 // peptidase activity // inferred from electronic annotation///0008237 // metallopeptidase activity // inferred from electronic annotation///0008270 // zinc ion binding // inferred from electronic annotation///0016787 // hydrolase activi…	chr16:3100003-3107322 (+) // 82.42 // p13.3
207345_at	FST	10468	0000122 // negative regulation of transcription from RNA polymerase II promoter // inferred from direct assay///0002244 // hematopoietic progenitor cell differentiation // inferred from direct assay///0007165 // signal transduction // non-traceable author statement///0032926 // negative regulation of activin receptor signaling pathway // inferred from direct assay///0051798 // positive regulation…	0005576 // extracellular region // traceable author statement	0004871 // signal transducer activity // non-traceable author statement///0005515 // protein binding // inferred from physical interaction///0043395 // heparan sulfate proteoglycan binding // inferred from electronic annotation///0048185 // activin binding // inferred from physical interaction	chr5:52776594-52781902 (+) // 98.34 // q11.2
207384_at	PGLYRP1	8993	0002221 // pattern recognition receptor signaling pathway // inferred from direct assay///0002376 // immune system process // inferred from electronic annotation///0006955 // immune response // traceable author statement///0009253 // peptidoglycan catabolic process // inferred from electronic annotation///0016045 // detection of bacterium // inferred from direct assay///0032689 // negative regula…	0005576 // extracellular region // non-traceable author statement///0070062 // extracellular exosome // inferred from direct assay	0008270 // zinc ion binding // inferred from electronic annotation///0008745 // N-acetylmuramoyl-L-alanine amidase activity // inferred from electronic annotation///0016019 // peptidoglycan receptor activity // inferred from direct assay///0042834 // peptidoglycan binding // inferred from direct assay	chr19:46522440-46526323 (-) // 99.71 // q13.32
207388_s_at	PTGES	9536	0001516 // prostaglandin biosynthetic process // inferred from direct assay///0002526 // acute inflammatory response // inferred from electronic annotation///0002544 // chronic inflammatory response // inferred from electronic annotation///0006629 // lipid metabolic process // inferred from electronic annotation///0006631 // fatty acid metabolic process // inferred from electronic annotation///00…	0005641 // nuclear envelope lumen // inferred from electronic annotation///0005737 // cytoplasm // inferred from electronic annotation///0005789 // endoplasmic reticulum membrane // traceable author statement///0016020 // membrane // traceable author statement///0016021 // integral component of membrane // inferred from direct assay///0043231 // intracellular membrane-bounded organelle // inferre…	0016853 // isomerase activity // inferred from electronic annotation///0043295 // glutathione binding // inferred from direct assay///0050220 // prostaglandin-E synthase activity // not recorded///0050220 // prostaglandin-E synthase activity // inferred from direct assay	chr9:132500609-132515294 (-) // 87.75 // q34.11
207415_at	PLA2R1	22925	0001816 // cytokine production // inferred from mutant phenotype///0006897 // endocytosis // inferred from electronic annotation///0006898 // receptor-mediated endocytosis // inferred from direct assay///0043517 // positive regulation of DNA damage response, signal transduction by p53 class mediator // inferred from mutant phenotype///0072593 // reactive oxygen species metabolic process // inferr…	0005576 // extracellular region // inferred from sequence or structural similarity///0005576 // extracellular region // non-traceable author statement///0005886 // plasma membrane // inferred from direct assay///0005887 // integral component of plasma membrane // non-traceable author statement///0009986 // cell surface // inferred from direct assay///0016020 // membrane // inferred from electroni…	0004872 // receptor activity // inferred from direct assay///0030246 // carbohydrate binding // inferred from electronic annotation///0043274 // phospholipase binding // inferred from physical interaction	chr2:160802863-160919121 (-) // 98.49 // q24.2
207454_at	GRIK3	2899	0006810 // transport // inferred from electronic annotation///0006811 // ion transport // inferred from electronic annotation///0007196 // adenylate cyclase-inhibiting G-protein coupled glutamate receptor signaling pathway // inferred from direct assay///0007215 // glutamate receptor signaling pathway // inferred from direct assay///0007216 // G-protein coupled glutamate receptor signaling pathwa…	0005886 // plasma membrane // not recorded///0005886 // plasma membrane // traceable author statement///0005887 // integral component of plasma membrane // inferred from direct assay///0016020 // membrane // inferred from electronic annotation///0016021 // integral component of membrane // inferred from electronic annotation///0030054 // cell junction // inferred from electronic annotation///0030…	0001640 // adenylate cyclase inhibiting G-protein coupled glutamate receptor activity // inferred from direct assay///0004872 // receptor activity // inferred from electronic annotation///0004970 // ionotropic glutamate receptor activity // inferred from direct assay///0004970 // ionotropic glutamate receptor activity // inferred from sequence or structural similarity///0005216 // ion channel act…	chr1:37266613-37499726 (-) // 99.78 // p34.3
207463_x_at	PRSS3	5646	0006508 // proteolysis // inferred from direct assay///0006508 // proteolysis // non-traceable author statement///0006766 // vitamin metabolic process // traceable author statement///0006767 // water-soluble vitamin metabolic process // traceable author statement///0007586 // digestion // traceable author statement///0009235 // cobalamin metabolic process // traceable author statement///0031638 /…	0005576 // extracellular region // traceable author statement///0005615 // extracellular space // inferred from direct assay///0070062 // extracellular exosome // inferred from direct assay	0004252 // serine-type endopeptidase activity // inferred from direct assay///0005509 // calcium ion binding // inferred from direct assay///0005515 // protein binding // inferred from physical interaction///0008233 // peptidase activity // inferred from electronic annotation///0008236 // serine-type peptidase activity // inferred from direct assay///0016787 // hydrolase activity // inferred from…	chr9:33795558-33799228 (+) // 99.13 // p13.3
207485_x_at	BTN3A1	11119	0002250 // adaptive immune response // inferred from electronic annotation///0002376 // immune system process // inferred from electronic annotation///0050663 // cytokine secretion // inferred from direct assay///0050798 // activated T cell proliferation // inferred from mutant phenotype///0050852 // T cell receptor signaling pathway // inferred from direct assay///0072643 // interferon-gamma sec…	0005886 // plasma membrane // inferred from direct assay///0016020 // membrane // inferred from electronic annotation///0016021 // integral component of membrane // inferred from electronic annotation	0005515 // protein binding // inferred from physical interaction	chr6:26402581-26411819 (+) // 92.64 // p22.2
207496_at	MS4A2	2206	0006954 // inflammatory response // inferred from electronic annotation///0006955 // immune response // inferred from mutant phenotype///0007165 // signal transduction // inferred from electronic annotation///0007166 // cell surface receptor signaling pathway // inferred from electronic annotation///0007202 // activation of phospholipase C activity // inferred from electronic annotation///0007205…	0005768 // endosome // inferred from electronic annotation///0005886 // plasma membrane // traceable author statement///0005887 // integral component of plasma membrane // non-traceable author statement///0009897 // external side of plasma membrane // inferred from electronic annotation///0016020 // membrane // inferred from electronic annotation///0016021 // integral component of membrane // inf…	0019767 // IgE receptor activity // inferred from electronic annotation///0019863 // IgE binding // inferred from electronic annotation///0019901 // protein kinase binding // inferred from electronic annotation///0042169 // SH2 domain binding // inferred from electronic annotation///0051219 // phosphoprotein binding // inferred from electronic annotation	chr11:59856136-59866017 (+) // 91.26 // q12.1
207497_s_at	MS4A2	2206	0006954 // inflammatory response // inferred from electronic annotation///0006955 // immune response // inferred from mutant phenotype///0007165 // signal transduction // inferred from electronic annotation///0007166 // cell surface receptor signaling pathway // inferred from electronic annotation///0007202 // activation of phospholipase C activity // inferred from electronic annotation///0007205…	0005768 // endosome // inferred from electronic annotation///0005886 // plasma membrane // traceable author statement///0005887 // integral component of plasma membrane // non-traceable author statement///0009897 // external side of plasma membrane // inferred from electronic annotation///0016020 // membrane // inferred from electronic annotation///0016021 // integral component of membrane // inf…	0019767 // IgE receptor activity // inferred from electronic annotation///0019863 // IgE binding // inferred from electronic annotation///0019901 // protein kinase binding // inferred from electronic annotation///0042169 // SH2 domain binding // inferred from electronic annotation///0051219 // phosphoprotein binding // inferred from electronic annotation	chr11:59856188-59863238 (+) // 100.0 // q12.1
207538_at	IL4	3565	0001774 // microglial cell activation // inferred from electronic annotation///0001934 // positive regulation of protein phosphorylation // inferred from electronic annotation///0002227 // innate immune response in mucosa // inferred from electronic annotation///0002230 // positive regulation of defense response to virus by host // inferred from electronic annotation///0002296 // T-helper 1 cell …	0005576 // extracellular region // inferred from electronic annotation///0005615 // extracellular space // traceable author statement///0009897 // external side of plasma membrane // inferred from electronic annotation	0005125 // cytokine activity // not recorded///0005126 // cytokine receptor binding // inferred from electronic annotation///0005136 // interleukin-4 receptor binding // traceable author statement///0005515 // protein binding // inferred from physical interaction///0008083 // growth factor activity // non-traceable author statement	chr5:132009677-132018370 (+) // 95.15 // q31.1
207539_s_at	IL4	3565	0001774 // microglial cell activation // inferred from electronic annotation///0001934 // positive regulation of protein phosphorylation // inferred from electronic annotation///0002227 // innate immune response in mucosa // inferred from electronic annotation///0002230 // positive regulation of defense response to virus by host // inferred from electronic annotation///0002296 // T-helper 1 cell …	0005576 // extracellular region // inferred from electronic annotation///0005615 // extracellular space // traceable author statement///0009897 // external side of plasma membrane // inferred from electronic annotation	0005125 // cytokine activity // not recorded///0005126 // cytokine receptor binding // inferred from electronic annotation///0005136 // interleukin-4 receptor binding // traceable author statement///0005515 // protein binding // inferred from physical interaction///0008083 // growth factor activity // non-traceable author statement	chr5:132009677-132018370 (+) // 95.15 // q31.1
207652_s_at	CMKLR1	1240	0001501 // skeletal system development // traceable author statement///0006935 // chemotaxis // inferred from direct assay///0006955 // immune response // traceable author statement///0007165 // signal transduction // inferred from electronic annotation///0007186 // G-protein coupled receptor signaling pathway // inferred from direct assay///0007186 // G-protein coupled receptor signaling pathway…	0005886 // plasma membrane // inferred from direct assay///0005887 // integral component of plasma membrane // traceable author statement///0016020 // membrane // inferred from electronic annotation///0016021 // integral component of membrane // non-traceable author statement	0004871 // signal transducer activity // inferred from electronic annotation///0004872 // receptor activity // traceable author statement///0004930 // G-protein coupled receptor activity // non-traceable author statement///0004950 // chemokine receptor activity // traceable author statement///0005515 // protein binding // inferred from physical interaction	chr12:108685346-108733086 (-) // 88.05 // q23.3
207767_s_at	EGR4	1961	0006351 // transcription, DNA-templated // inferred from electronic annotation///0006355 // regulation of transcription, DNA-templated // inferred from electronic annotation///0008284 // positive regulation of cell proliferation // traceable author statement///0043066 // negative regulation of apoptotic process // ---///0071320 // cellular response to cAMP // ---///0071371 // cellular response to…	0005634 // nucleus // inferred from electronic annotation///0005737 // cytoplasm // ---	0003676 // nucleic acid binding // inferred from electronic annotation///0003677 // DNA binding // inferred from electronic annotation///0003700 // transcription factor activity, sequence-specific DNA binding // non-traceable author statement///0046872 // metal ion binding // inferred from electronic annotation	chr2:73518065-73520610 (-) // 98.52 // p13.1
207768_at	EGR4	1961	0006351 // transcription, DNA-templated // inferred from electronic annotation///0006355 // regulation of transcription, DNA-templated // inferred from electronic annotation///0008284 // positive regulation of cell proliferation // traceable author statement///0043066 // negative regulation of apoptotic process // ---///0071320 // cellular response to cAMP // ---///0071371 // cellular response to…	0005634 // nucleus // inferred from electronic annotation///0005737 // cytoplasm // ---	0003676 // nucleic acid binding // inferred from electronic annotation///0003677 // DNA binding // inferred from electronic annotation///0003700 // transcription factor activity, sequence-specific DNA binding // non-traceable author statement///0046872 // metal ion binding // inferred from electronic annotation	chr2:73518065-73520610 (-) // 98.52 // p13.1
207773_x_at	CYP3A43	64816	0006805 // xenobiotic metabolic process // traceable author statement///0044281 // small molecule metabolic process // traceable author statement///0055114 // oxidation-reduction process // inferred from electronic annotation	0005783 // endoplasmic reticulum // inferred from electronic annotation///0005789 // endoplasmic reticulum membrane // traceable author statement///0016020 // membrane // inferred from electronic annotation///0016021 // integral component of membrane // inferred from electronic annotation///0031090 // organelle membrane // inferred from electronic annotation///0043231 // intracellular membrane-bo…	0004497 // monooxygenase activity // inferred from sequence or structural similarity///0005506 // iron ion binding // inferred from electronic annotation///0016491 // oxidoreductase activity // inferred from electronic annotation///0016705 // oxidoreductase activity, acting on paired donors, with incorporation or reduction of molecular oxygen // inferred from electronic annotation///0016712 // ox…	chr7:99425738-99463727 (+) // 99.94 // q22.1
207794_at	CCR2	729230	0001974 // blood vessel remodeling // inferred from sequence or structural similarity///0002407 // dendritic cell chemotaxis // traceable author statement///0002827 // positive regulation of T-helper 1 type immune response // inferred from sequence or structural similarity///0002829 // negative regulation of type 2 immune response // inferred from sequence or structural similarity///0006874 // ce…	0005737 // cytoplasm // inferred from direct assay///0005829 // cytosol // inferred from sequence or structural similarity///0005886 // plasma membrane // inferred from direct assay///0005886 // plasma membrane // traceable author statement///0005887 // integral component of plasma membrane // traceable author statement///0016020 // membrane // inferred from electronic annotation///0016021 // int…	0004871 // signal transducer activity // inferred from electronic annotation///0004930 // G-protein coupled receptor activity // inferred from electronic annotation///0004950 // chemokine receptor activity // traceable author statement///0005515 // protein binding // inferred from physical interaction///0016493 // C-C chemokine receptor activity // inferred from electronic annotation///0031727 //…	chr3:46395639-46400909 (+) // 99.55 // p21.31
207815_at	PF4V1	5197	0002690 // positive regulation of leukocyte chemotaxis // not recorded///0006954 // inflammatory response // not recorded///0006955 // immune response // not recorded///0007186 // G-protein coupled receptor signaling pathway // not recorded///0030168 // platelet activation // inferred from electronic annotation///0030595 // leukocyte chemotaxis // inferred from electronic annotation///0032496 // …	0005576 // extracellular region // inferred from electronic annotation///0005615 // extracellular space // not recorded	0005125 // cytokine activity // inferred from electronic annotation///0008009 // chemokine activity // not recorded///0008201 // heparin binding // not recorded///0045236 // CXCR chemokine receptor binding // not recorded	chr4:74719012-74720201 (+) // 98.41 // q13.3
207844_at	IL13	3596	0001774 // microglial cell activation // inferred from electronic annotation///0002639 // positive regulation of immunoglobulin production // not recorded///0006928 // movement of cell or subcellular component // traceable author statement///0006954 // inflammatory response // inferred from electronic annotation///0006955 // immune response // inferred from electronic annotation///0007165 // sign…	0005576 // extracellular region // inferred from direct assay///0005615 // extracellular space // not recorded///0005615 // extracellular space // inferred from sequence or structural similarity///0005737 // cytoplasm // inferred from electronic annotation///0009897 // external side of plasma membrane // inferred from electronic annotation	0005125 // cytokine activity // inferred from electronic annotation///0005126 // cytokine receptor binding // inferred from electronic annotation///0005144 // interleukin-13 receptor binding // not recorded///0005515 // protein binding // inferred from physical interaction	chr5:131993864-131996802 (+) // 99.69 // q31.1
207850_at	CXCL3	2921	0002690 // positive regulation of leukocyte chemotaxis // not recorded///0006935 // chemotaxis // inferred from electronic annotation///0006954 // inflammatory response // not recorded///0006955 // immune response // not recorded///0007186 // G-protein coupled receptor signaling pathway // not recorded///0030593 // neutrophil chemotaxis // inferred from sequence or structural similarity///0032496…	0005576 // extracellular region // traceable author statement///0005615 // extracellular space // inferred from direct assay	0005125 // cytokine activity // inferred from electronic annotation///0008009 // chemokine activity // not recorded///0008009 // chemokine activity // inferred from sequence or structural similarity///0045236 // CXCR chemokine receptor binding // not recorded	chr4:74902313-74904405 (-) // 92.86 // q13.3
207890_s_at	MMP25	64386	0006508 // proteolysis // non-traceable author statement///0006954 // inflammatory response // non-traceable author statement///0060022 // hard palate development // inferred from electronic annotation	0005576 // extracellular region // inferred from electronic annotation///0005578 // proteinaceous extracellular matrix // non-traceable author statement///0005886 // plasma membrane // inferred from electronic annotation///0016020 // membrane // non-traceable author statement///0016021 // integral component of membrane // inferred from electronic annotation///0031012 // extracellular matrix // in…	0004222 // metalloendopeptidase activity // inferred from electronic annotation///0005509 // calcium ion binding // inferred from electronic annotation///0008233 // peptidase activity // inferred from electronic annotation///0008237 // metallopeptidase activity // inferred from electronic annotation///0008270 // zinc ion binding // inferred from electronic annotation///0016787 // hydrolase activi…	chr16:3096681-3110606 (+) // 94.65 // p13.3
207902_at	IL5RA	3568	0000165 // MAPK cascade // traceable author statement///0000186 // activation of MAPKK activity // traceable author statement///0002437 // inflammatory response to antigenic stimulus // inferred from electronic annotation///0007165 // signal transduction // traceable author statement///0007173 // epidermal growth factor receptor signaling pathway // traceable author statement///0007264 // small G…	0005615 // extracellular space // traceable author statement///0005622 // intracellular // traceable author statement///0005886 // plasma membrane // traceable author statement///0005895 // interleukin-5 receptor complex // non-traceable author statement///0016020 // membrane // inferred from electronic annotation///0016021 // integral component of membrane // inferred from electronic annotation	0004896 // cytokine receptor activity // inferred from electronic annotation///0004914 // interleukin-5 receptor activity // traceable author statement///0005515 // protein binding // inferred from physical interaction	chr3:3111420-3151664 (-) // 95.5 // p26.2
207926_at	GP5	2814	0007155 // cell adhesion // non-traceable author statement///0007160 // cell-matrix adhesion // inferred from electronic annotation///0007409 // axonogenesis // not recorded///0007596 // blood coagulation // traceable author statement///0007597 // blood coagulation, intrinsic pathway // traceable author statement///0007599 // hemostasis // inferred from electronic annotation///0010544 // negative…	0005886 // plasma membrane // traceable author statement///0005887 // integral component of plasma membrane // traceable author statement///0016020 // membrane // inferred from electronic annotation///0016021 // integral component of membrane // inferred from electronic annotation///0070062 // extracellular exosome // inferred from direct assay	0005515 // protein binding // inferred from physical interaction///0005518 // collagen binding // inferred from electronic annotation	chr3:194114983-194120234 (-) // 58.06 // q29
207952_at	IL5	3567	0000165 // MAPK cascade // traceable author statement///0000186 // activation of MAPKK activity // traceable author statement///0006954 // inflammatory response // inferred from electronic annotation///0006955 // immune response // inferred from electronic annotation///0007173 // epidermal growth factor receptor signaling pathway // traceable author statement///0007264 // small GTPase mediated si…	0005576 // extracellular region // inferred from direct assay///0005576 // extracellular region // traceable author statement///0005615 // extracellular space // traceable author statement///0005622 // intracellular // traceable author statement	0005125 // cytokine activity // not recorded///0005137 // interleukin-5 receptor binding // inferred from electronic annotation///0005515 // protein binding // inferred from physical interaction///0008083 // growth factor activity // inferred from electronic annotation	chr5:131877135-131879214 (-) // 99.88 // q31.1
208009_s_at	ARHGEF16	27237	0007264 // small GTPase mediated signal transduction // traceable author statement///0035023 // regulation of Rho protein signal transduction // inferred from electronic annotation///0043065 // positive regulation of apoptotic process // traceable author statement///0043547 // positive regulation of GTPase activity // inferred from electronic annotation///0048011 // neurotrophin TRK receptor sign…	0005737 // cytoplasm // inferred from electronic annotation///0005829 // cytosol // traceable author statement	0005085 // guanyl-nucleotide exchange factor activity // inferred from electronic annotation///0005089 // Rho guanyl-nucleotide exchange factor activity // inferred from direct assay///0005515 // protein binding // inferred from physical interaction///0017048 // Rho GTPase binding // inferred from physical interaction///0030165 // PDZ domain binding // inferred from physical interaction///0030971…	chr1:3383534-3397675 (+) // 99.37 // p36.32
208015_at						chr4:146459730-146461886 (+) // 96.82 // q31.21
208068_x_at	CSH1///CSHL1///GH1///GH2	1442///1444///2688///2689	0002092 // positive regulation of receptor internalization // inferred from direct assay///0007259 // JAK-STAT cascade // inferred from direct assay///0010535 // positive regulation of activation of JAK2 kinase activity // inferred from direct assay///0014068 // positive regulation of phosphatidylinositol 3-kinase signaling // inferred from direct assay///0015758 // glucose transport // inferred …	0005576 // extracellular region // traceable author statement///0005576 // extracellular region // inferred from electronic annotation///0005615 // extracellular space // inferred from direct assay///0005622 // intracellular // inferred from direct assay///0005622 // intracellular // traceable author statement///0005783 // endoplasmic reticulum // inferred from direct assay///0031988 // membrane-…	0005131 // growth hormone receptor binding // inferred from direct assay///0005131 // growth hormone receptor binding // inferred from physical interaction///0005148 // prolactin receptor binding // inferred from direct assay///0005148 // prolactin receptor binding // inferred from physical interaction///0005179 // hormone activity // inferred from electronic annotation///0005179 // hormone activ…	chr17:61994562-61996198 (-) // 99.73 // q23.3///chr17:61957574-61959223 (-) // 96.8 // q23.3
208069_x_at	CSH1///CSHL1///GH1///GH2	1442///1444///2688///2689	0002092 // positive regulation of receptor internalization // inferred from direct assay///0007259 // JAK-STAT cascade // inferred from direct assay///0010535 // positive regulation of activation of JAK2 kinase activity // inferred from direct assay///0014068 // positive regulation of phosphatidylinositol 3-kinase signaling // inferred from direct assay///0015758 // glucose transport // inferred …	0005576 // extracellular region // traceable author statement///0005576 // extracellular region // inferred from electronic annotation///0005615 // extracellular space // inferred from direct assay///0005622 // intracellular // inferred from direct assay///0005622 // intracellular // traceable author statement///0005783 // endoplasmic reticulum // inferred from direct assay///0031988 // membrane-…	0005131 // growth hormone receptor binding // inferred from direct assay///0005131 // growth hormone receptor binding // inferred from physical interaction///0005148 // prolactin receptor binding // inferred from direct assay///0005148 // prolactin receptor binding // inferred from physical interaction///0005179 // hormone activity // inferred from electronic annotation///0005179 // hormone activ…	chr17:61994562-61996198 (-) // 99.81 // q23.3///chr17:61957574-61959223 (-) // 96.46 // q23.3
208102_s_at	PSD	5662	0007165 // signal transduction // non-traceable author statement///0016192 // vesicle-mediated transport // not recorded///0030182 // neuron differentiation // not recorded///0032012 // regulation of ARF protein signal transduction // inferred from electronic annotation///0043547 // positive regulation of GTPase activity // not recorded///0043547 // positive regulation of GTPase activity // infer…	0001726 // ruffle // inferred from electronic annotation///0005802 // trans-Golgi network // not recorded///0005886 // plasma membrane // inferred from electronic annotation///0016020 // membrane // inferred from electronic annotation///0016021 // integral component of membrane // inferred from electronic annotation///0030054 // cell junction // not recorded///0042995 // cell projection // inferr…	0004871 // signal transducer activity // non-traceable author statement///0005085 // guanyl-nucleotide exchange factor activity // inferred from electronic annotation///0005086 // ARF guanyl-nucleotide exchange factor activity // not recorded///0005515 // protein binding // inferred from physical interaction///0005543 // phospholipid binding // inferred from electronic annotation	chr10:104162374-104176632 (-) // 80.38 // q24.32
208131_s_at	PTGIS	5740	0001516 // prostaglandin biosynthetic process // inferred from direct assay///0006629 // lipid metabolic process // inferred from electronic annotation///0006631 // fatty acid metabolic process // inferred from electronic annotation///0006633 // fatty acid biosynthetic process // inferred from electronic annotation///0006690 // icosanoid metabolic process // traceable author statement///0006693 /…	0005615 // extracellular space // inferred from sequence or structural similarity///0005634 // nucleus // inferred from direct assay///0005737 // cytoplasm // inferred from electronic annotation///0005783 // endoplasmic reticulum // inferred from direct assay///0005789 // endoplasmic reticulum membrane // traceable author statement///0005901 // caveola // inferred from direct assay///0016020 // m…	0004497 // monooxygenase activity // inferred from electronic annotation///0005506 // iron ion binding // inferred from electronic annotation///0005515 // protein binding // inferred from physical interaction///0008116 // prostaglandin-I synthase activity // inferred from direct assay///0016705 // oxidoreductase activity, acting on paired donors, with incorporation or reduction of molecular oxyge…	chr20:48120413-48184707 (-) // 67.3 // q13.13
208183_at	TACR3	6870	0007165 // signal transduction // inferred from electronic annotation///0007186 // G-protein coupled receptor signaling pathway // inferred from electronic annotation///0007217 // tachykinin receptor signaling pathway // traceable author statement///0007568 // aging // inferred from electronic annotation///0010460 // positive regulation of heart rate // inferred from electronic annotation///00323…	0005634 // nucleus // inferred from electronic annotation///0005737 // cytoplasm // inferred from electronic annotation///0005886 // plasma membrane // traceable author statement///0005887 // integral component of plasma membrane // traceable author statement///0016020 // membrane // inferred from electronic annotation///0016021 // integral component of membrane // inferred from electronic annota…	0004871 // signal transducer activity // inferred from electronic annotation///0004930 // G-protein coupled receptor activity // inferred from electronic annotation///0004995 // tachykinin receptor activity // inferred from electronic annotation///0005515 // protein binding // inferred from physical interaction	chr4:104510624-104640973 (-) // 99.77 // q24
208193_at	IL9	3578	0006954 // inflammatory response // traceable author statement///0006955 // immune response // inferred from electronic annotation///0008284 // positive regulation of cell proliferation // traceable author statement///0030307 // positive regulation of cell growth // inferred from electronic annotation///0045407 // positive regulation of interleukin-5 biosynthetic process // inferred from sequence…	0005576 // extracellular region // inferred from electronic annotation///0005615 // extracellular space // inferred from electronic annotation	0005125 // cytokine activity // inferred from electronic annotation///0005126 // cytokine receptor binding // inferred from electronic annotation///0005140 // interleukin-9 receptor binding // inferred from electronic annotation///0008083 // growth factor activity // inferred from electronic annotation	chr5:135227934-135231516 (-) // 100.0 // q31.1
208200_at	IL1A	3552	0001660 // fever generation // inferred from electronic annotation///0002248 // connective tissue replacement involved in inflammatory response wound healing // inferred from electronic annotation///0006915 // apoptotic process // traceable author statement///0006954 // inflammatory response // traceable author statement///0006955 // immune response // inferred from electronic annotation///000828…	0005576 // extracellular region // traceable author statement///0005615 // extracellular space // inferred from direct assay///0005615 // extracellular space // inferred from mutant phenotype///0005829 // cytosol // inferred from direct assay	0005125 // cytokine activity // inferred from mutant phenotype///0005149 // interleukin-1 receptor binding // inferred from electronic annotation///0005507 // copper ion binding // inferred from direct assay///0005515 // protein binding // inferred from physical interaction	chr2:113531637-113542047 (-) // 62.59 // q13
208256_at	EFNA2	1943	0007267 // cell-cell signaling // traceable author statement///0007411 // axon guidance // not recorded///0007411 // axon guidance // traceable author statement///0021772 // olfactory bulb development // inferred from electronic annotation///0030316 // osteoclast differentiation // not recorded///0030316 // osteoclast differentiation // inferred from sequence or structural similarity///0046849 //…	0005576 // extracellular region // traceable author statement///0005886 // plasma membrane // not recorded///0005886 // plasma membrane // traceable author statement///0016020 // membrane // inferred from electronic annotation///0031225 // anchored component of membrane // inferred from electronic annotation///0031594 // neuromuscular junction // inferred from electronic annotation///0043204 // p…	0046875 // ephrin receptor binding // inferred from electronic annotation	chr19:1286152-1300227 (+) // 80.77 // p13.3
208262_x_at	MEFV	4210	0002376 // immune system process // inferred from electronic annotation///0006954 // inflammatory response // inferred from direct assay///0010508 // positive regulation of autophagy // inferred from direct assay///0032691 // negative regulation of interleukin-1 beta production // inferred from mutant phenotype///0032695 // negative regulation of interleukin-12 production // inferred from mutant …	0001726 // ruffle // inferred from electronic annotation///0005622 // intracellular // inferred from electronic annotation///0005634 // nucleus // inferred from direct assay///0005737 // cytoplasm // inferred from direct assay///0005829 // cytosol // traceable author statement///0005856 // cytoskeleton // inferred from electronic annotation///0005874 // microtubule // inferred from electronic ann…	0003779 // actin binding // inferred from direct assay///0005515 // protein binding // inferred from physical interaction///0008270 // zinc ion binding // non-traceable author statement///0046872 // metal ion binding // inferred from electronic annotation	chr16:3292027-3306627 (-) // 77.64 // p13.3
208268_at	ADAM28	10863	0006508 // proteolysis // inferred from electronic annotation///0007229 // integrin-mediated signaling pathway // inferred from electronic annotation///0007283 // spermatogenesis // traceable author statement	0005576 // extracellular region // inferred from electronic annotation///0005886 // plasma membrane // inferred from electronic annotation///0016020 // membrane // inferred from electronic annotation///0016021 // integral component of membrane // inferred from electronic annotation	0004222 // metalloendopeptidase activity // inferred from electronic annotation///0008233 // peptidase activity // inferred from electronic annotation///0008237 // metallopeptidase activity // inferred from direct assay///0008270 // zinc ion binding // inferred from electronic annotation///0016787 // hydrolase activity // inferred from electronic annotation///0046872 // metal ion binding // infer…	chr8:24151623-24193610 (+) // 87.01 // p21.2
208269_s_at	ADAM28	10863	0006508 // proteolysis // inferred from electronic annotation///0007229 // integrin-mediated signaling pathway // inferred from electronic annotation///0007283 // spermatogenesis // traceable author statement	0005576 // extracellular region // inferred from electronic annotation///0005886 // plasma membrane // inferred from electronic annotation///0016020 // membrane // inferred from electronic annotation///0016021 // integral component of membrane // inferred from electronic annotation	0004222 // metalloendopeptidase activity // inferred from electronic annotation///0008233 // peptidase activity // inferred from electronic annotation///0008237 // metallopeptidase activity // inferred from direct assay///0008270 // zinc ion binding // inferred from electronic annotation///0016787 // hydrolase activity // inferred from electronic annotation///0046872 // metal ion binding // infer…	chr8:24151623-24193610 (+) // 87.01 // p21.2
208304_at	CCR3	1232	0001938 // positive regulation of endothelial cell proliferation // inferred from electronic annotation///0006935 // chemotaxis // inferred from electronic annotation///0006954 // inflammatory response // inferred from electronic annotation///0006968 // cellular defense response // traceable author statement///0007155 // cell adhesion // traceable author statement///0007165 // signal transduction…	0005829 // cytosol // traceable author statement///0005886 // plasma membrane // traceable author statement///0005887 // integral component of plasma membrane // traceable author statement///0016020 // membrane // inferred from electronic annotation///0016021 // integral component of membrane // inferred from electronic annotation	0004871 // signal transducer activity // inferred from electronic annotation///0004930 // G-protein coupled receptor activity // inferred from electronic annotation///0004950 // chemokine receptor activity // traceable author statement///0005515 // protein binding // inferred from physical interaction///0016493 // C-C chemokine receptor activity // inferred from electronic annotation	chr3:46306618-46307819 (+) // 100.0 // p21.31
208338_at	P2RX3	5024	0001666 // response to hypoxia // inferred from electronic annotation///0006810 // transport // traceable author statement///0006811 // ion transport // inferred from electronic annotation///0006812 // cation transport // inferred from electronic annotation///0006812 // cation transport // ---///0007165 // signal transduction // traceable author statement///0007268 // synaptic transmission // inf…	0005639 // integral component of nuclear inner membrane // not recorded///0005791 // rough endoplasmic reticulum // inferred from electronic annotation///0005794 // Golgi apparatus // inferred from electronic annotation///0005887 // integral component of plasma membrane // inferred from electronic annotation///0016020 // membrane // inferred from electronic annotation///0016021 // integral compon…	0001614 // purinergic nucleotide receptor activity // non-traceable author statement///0004931 // extracellular ATP-gated cation channel activity // non-traceable author statement///0005216 // ion channel activity // inferred from electronic annotation///0005524 // ATP binding // non-traceable author statement	chr11:57105948-57137549 (+) // 92.58 // q12.1
208349_at	TRPA1	8989	0006810 // transport // inferred from electronic annotation///0006811 // ion transport // traceable author statement///0006816 // calcium ion transport // inferred from electronic annotation///0007166 // cell surface receptor signaling pathway // inferred from electronic annotation///0009409 // response to cold // inferred from electronic annotation///0010033 // response to organic substance // i…	0005886 // plasma membrane // traceable author statement///0005887 // integral component of plasma membrane // inferred from mutant phenotype///0016020 // membrane // inferred from electronic annotation///0016021 // integral component of membrane // inferred from electronic annotation///0032421 // stereocilium bundle // inferred from electronic annotation	0005216 // ion channel activity // inferred from electronic annotation///0005218 // intracellular ligand-gated calcium channel activity // inferred from direct assay///0005218 // intracellular ligand-gated calcium channel activity // inferred from mutant phenotype///0005262 // calcium channel activity // inferred from electronic annotation///0005515 // protein binding // inferred from electronic …	chr8:72933485-72987819 (-) // 96.32 // q13.3
208350_at	CSN1S1	1446	0006810 // transport // inferred from electronic annotation///0055085 // transmembrane transport // traceable author statement	0005576 // extracellular region // traceable author statement///0005615 // extracellular space // inferred from direct assay	0005215 // transporter activity // inferred from electronic annotation	chr4:70796798-70812288 (+) // 100.0 // q13.3
208351_s_at	MAPK1	5594	0000165 // MAPK cascade // traceable author statement///0000186 // activation of MAPKK activity // traceable author statement///0000187 // activation of MAPK activity // traceable author statement///0000189 // MAPK import into nucleus // inferred from electronic annotation///0002224 // toll-like receptor signaling pathway // traceable author statement///0002755 // MyD88-dependent toll-like recept…	0005622 // intracellular // inferred from electronic annotation///0005634 // nucleus // inferred from direct assay///0005634 // nucleus // traceable author statement///0005654 // nucleoplasm // inferred from direct assay///0005654 // nucleoplasm // traceable author statement///0005737 // cytoplasm // inferred from direct assay///0005737 // cytoplasm // inferred from sequence or structural similar…	0000166 // nucleotide binding // inferred from electronic annotation///0001784 // phosphotyrosine binding // inferred from electronic annotation///0003677 // DNA binding // inferred from electronic annotation///0004672 // protein kinase activity // inferred from electronic annotation///0004674 // protein serine/threonine kinase activity // inferred from direct assay///0004707 // MAP kinase activi…	chr22:22118344-22221929 (-) // 87.71 // q11.21
208367_x_at	CYP3A4	1576	0006629 // lipid metabolic process // traceable author statement///0006706 // steroid catabolic process // inferred from mutant phenotype///0006805 // xenobiotic metabolic process // traceable author statement///0008202 // steroid metabolic process // inferred from mutant phenotype///0008209 // androgen metabolic process // traceable author statement///0009822 // alkaloid catabolic process // inf…	0005737 // cytoplasm // inferred from direct assay///0005783 // endoplasmic reticulum // inferred from electronic annotation///0005789 // endoplasmic reticulum membrane // traceable author statement///0016020 // membrane // inferred from electronic annotation///0016020 // membrane // traceable author statement///0016021 // integral component of membrane // inferred from electronic annotation///00…	0004497 // monooxygenase activity // inferred from direct assay///0004497 // monooxygenase activity // inferred from sequence or structural similarity///0005496 // steroid binding // inferred from direct assay///0005506 // iron ion binding // inferred from direct assay///0008395 // steroid hydroxylase activity // inferred from mutant phenotype///0016491 // oxidoreductase activity // inferred from…	chr7:99355298-99381764 (-) // 98.46 // q22.1
208374_s_at	CAPZA1	829	0006461 // protein complex assembly // traceable author statement///0006928 // movement of cell or subcellular component // traceable author statement///0007596 // blood coagulation // traceable author statement///0045087 // innate immune response // traceable author statement///0051016 // barbed-end actin filament capping // inferred from electronic annotation///0051693 // actin filament capping…	0005576 // extracellular region // traceable author statement///0005737 // cytoplasm // inferred from electronic annotation///0005829 // cytosol // traceable author statement///0005856 // cytoskeleton // traceable author statement///0008290 // F-actin capping protein complex // inferred from electronic annotation///0015629 // actin cytoskeleton // traceable author statement///0070062 // extracell…	0003779 // actin binding // inferred from electronic annotation///0005515 // protein binding // inferred from physical interaction	chr1:113162466-113214234 (+) // 96.52 // p13.2
208402_at	IL17A	3605	0006486 // protein glycosylation // traceable author statement///0006915 // apoptotic process // traceable author statement///0006954 // inflammatory response // not recorded///0006955 // immune response // traceable author statement///0007166 // cell surface receptor signaling pathway // not recorded///0007267 // cell-cell signaling // traceable author statement///0008219 // cell death // tracea…	0005576 // extracellular region // inferred from electronic annotation///0005615 // extracellular space // inferred from electronic annotation///0005737 // cytoplasm // inferred from electronic annotation///0009897 // external side of plasma membrane // inferred from electronic annotation	0005125 // cytokine activity // inferred from electronic annotation///0005126 // cytokine receptor binding // not recorded///0005515 // protein binding // inferred from physical interaction	chr6:52051184-52055436 (+) // 99.15 // p12.2
208422_at	MSR1	4481	0006897 // endocytosis // inferred from electronic annotation///0006898 // receptor-mediated endocytosis // traceable author statement///0010744 // positive regulation of macrophage derived foam cell differentiation // inferred from sequence or structural similarity///0010886 // positive regulation of cholesterol storage // inferred from sequence or structural similarity///0030301 // cholesterol …	0005581 // collagen trimer // inferred from electronic annotation///0005829 // cytosol // inferred from electronic annotation///0005886 // plasma membrane // traceable author statement///0005887 // integral component of plasma membrane // traceable author statement///0016020 // membrane // inferred from electronic annotation///0016021 // integral component of membrane // inferred from electronic …	0005044 // scavenger receptor activity // inferred from electronic annotation///0005515 // protein binding // inferred from physical interaction///0030169 // low-density lipoprotein particle binding // inferred from sequence or structural similarity	chr8:15998287-16050168 (-) // 99.93 // p22
208423_s_at	MSR1	4481	0006897 // endocytosis // inferred from electronic annotation///0006898 // receptor-mediated endocytosis // traceable author statement///0010744 // positive regulation of macrophage derived foam cell differentiation // inferred from sequence or structural similarity///0010886 // positive regulation of cholesterol storage // inferred from sequence or structural similarity///0030301 // cholesterol …	0005581 // collagen trimer // inferred from electronic annotation///0005829 // cytosol // inferred from electronic annotation///0005886 // plasma membrane // traceable author statement///0005887 // integral component of plasma membrane // traceable author statement///0016020 // membrane // inferred from electronic annotation///0016021 // integral component of membrane // inferred from electronic …	0005044 // scavenger receptor activity // inferred from electronic annotation///0005515 // protein binding // inferred from physical interaction///0030169 // low-density lipoprotein particle binding // inferred from sequence or structural similarity	chr8:15998287-16050168 (-) // 99.93 // p22
208467_at	KLF12	11278	0000122 // negative regulation of transcription from RNA polymerase II promoter // inferred from direct assay///0006351 // transcription, DNA-templated // inferred from electronic annotation///0006355 // regulation of transcription, DNA-templated // inferred from electronic annotation///0006357 // regulation of transcription from RNA polymerase II promoter // traceable author statement///0045944 …	0005634 // nucleus // inferred from electronic annotation///0005654 // nucleoplasm // inferred from direct assay///0005737 // cytoplasm // inferred from direct assay	0000977 // RNA polymerase II regulatory region sequence-specific DNA binding // inferred from electronic annotation///0001227 // transcriptional repressor activity, RNA polymerase II transcription regulatory region sequence-specific binding // inferred from electronic annotation///0003676 // nucleic acid binding // inferred from electronic annotation///0003677 // DNA binding // inferred from dire…	chr13:74269626-74569159 (-) // 94.79 // q22.1
208485_x_at	CFLAR	8837	0006508 // proteolysis // inferred from electronic annotation///0006915 // apoptotic process // inferred from mutant phenotype///0006915 // apoptotic process // traceable author statement///0006919 // activation of cysteine-type endopeptidase activity involved in apoptotic process // not recorded///0007519 // skeletal muscle tissue development // inferred from sequence or structural similarity///…	0005737 // cytoplasm // inferred from direct assay///0005829 // cytosol // traceable author statement///0031264 // death-inducing signaling complex // inferred from direct assay///0031265 // CD95 death-inducing signaling complex // inferred from electronic annotation///0045121 // membrane raft // inferred from electronic annotation///0097342 // ripoptosome // inferred from direct assay	0002020 // protease binding // inferred from physical interaction///0004197 // cysteine-type endopeptidase activity // inferred from electronic annotation///0005123 // death receptor binding // inferred from electronic annotation///0005515 // protein binding // inferred from physical interaction///0008047 // enzyme activator activity // inferred from direct assay///0008234 // cysteine-type peptid…	chr2:201997758-202025666 (+) // 91.79 // q33.1
208525_s_at	OR2F1///OR2F2	26211///135948	0007165 // signal transduction // non-traceable author statement///0007186 // G-protein coupled receptor signaling pathway // not recorded///0007608 // sensory perception of smell // not recorded///0050896 // response to stimulus // inferred from electronic annotation///0050911 // detection of chemical stimulus involved in sensory perception of smell // not recorded///0050911 // detection of chem…	0005886 // plasma membrane // traceable author statement///0016020 // membrane // inferred from electronic annotation///0016021 // integral component of membrane // not recorded	0004871 // signal transducer activity // inferred from electronic annotation///0004930 // G-protein coupled receptor activity // inferred from electronic annotation///0004984 // olfactory receptor activity // not recorded	chr7:143657063-143658017 (+) // 99.9 // q35
208578_at	SCN10A	6336	0002027 // regulation of heart rate // inferred from mutant phenotype///0006810 // transport // inferred from electronic annotation///0006811 // ion transport // inferred from electronic annotation///0006814 // sodium ion transport // inferred from electronic annotation///0007600 // sensory perception // traceable author statement///0019228 // neuronal action potential // not recorded///0019233 /…	0001518 // voltage-gated sodium channel complex // inferred from direct assay///0005886 // plasma membrane // ---///0016020 // membrane // inferred from electronic annotation///0016021 // integral component of membrane // inferred from electronic annotation///0030424 // axon // inferred from electronic annotation///0044299 // C-fiber // inferred from electronic annotation///0070062 // extracellul…	0005216 // ion channel activity // inferred from electronic annotation///0005244 // voltage-gated ion channel activity // inferred from electronic annotation///0005248 // voltage-gated sodium channel activity // inferred from direct assay///0005272 // sodium channel activity // inferred from electronic annotation///0005515 // protein binding // inferred from electronic annotation///0044325 // ion…	chr3:38738836-38835501 (-) // 99.17 // p22.2
208607_s_at	SAA1///SAA2///SAA2-SAA4	6288///6289///100528017	0000187 // activation of MAPK activity // inferred from direct assay///0006898 // receptor-mediated endocytosis // traceable author statement///0006953 // acute-phase response // non-traceable author statement///0006953 // acute-phase response // inferred from electronic annotation///0007204 // positive regulation of cytosolic calcium ion concentration // inferred from direct assay///0007204 // p…	0005576 // extracellular region // non-traceable author statement///0005576 // extracellular region // traceable author statement///0005615 // extracellular space // not recorded///0005829 // cytosol // inferred from direct assay///0005829 // cytosol // non-traceable author statement///0005881 // cytoplasmic microtubule // inferred from direct assay///0034364 // high-density lipoprotein particle …	0001664 // G-protein coupled receptor binding // inferred from direct assay///0008201 // heparin binding // inferred from electronic annotation///0042056 // chemoattractant activity // not recorded	chr11:18288434-18291402 (+) // 97.29 // p15.1///chr11:18266923-18269558 (-) // 99.46 // p15.1
208640_at	RAC1	5879	0001934 // positive regulation of protein phosphorylation // inferred from mutant phenotype///0002093 // auditory receptor cell morphogenesis // inferred from electronic annotation///0002551 // mast cell chemotaxis // inferred from electronic annotation///0003382 // epithelial cell morphogenesis // inferred from electronic annotation///0006897 // endocytosis // inferred from electronic annotation…	0000139 // Golgi membrane // inferred from electronic annotation///0001891 // phagocytic cup // inferred from electronic annotation///0005622 // intracellular // inferred from electronic annotation///0005634 // nucleus // inferred from electronic annotation///0005737 // cytoplasm // inferred from direct assay///0005789 // endoplasmic reticulum membrane // traceable author statement///0005802 // t…	0000166 // nucleotide binding // inferred from electronic annotation///0003924 // GTPase activity // traceable author statement///0005515 // protein binding // inferred from physical interaction///0005525 // GTP binding // inferred from direct assay///0005525 // GTP binding // inferred from mutant phenotype///0017137 // Rab GTPase binding // inferred from electronic annotation///0019899 // enzyme…	chr7:6414160-6443598 (+) // 90.61 // p22.1
208641_s_at	RAC1	5879	0001934 // positive regulation of protein phosphorylation // inferred from mutant phenotype///0002093 // auditory receptor cell morphogenesis // inferred from electronic annotation///0002551 // mast cell chemotaxis // inferred from electronic annotation///0003382 // epithelial cell morphogenesis // inferred from electronic annotation///0006897 // endocytosis // inferred from electronic annotation…	0000139 // Golgi membrane // inferred from electronic annotation///0001891 // phagocytic cup // inferred from electronic annotation///0005622 // intracellular // inferred from electronic annotation///0005634 // nucleus // inferred from electronic annotation///0005737 // cytoplasm // inferred from direct assay///0005789 // endoplasmic reticulum membrane // traceable author statement///0005802 // t…	0000166 // nucleotide binding // inferred from electronic annotation///0003924 // GTPase activity // traceable author statement///0005515 // protein binding // inferred from physical interaction///0005525 // GTP binding // inferred from direct assay///0005525 // GTP binding // inferred from mutant phenotype///0017137 // Rab GTPase binding // inferred from electronic annotation///0019899 // enzyme…	chr7:6414228-6442133 (+) // 88.64 // p22.1///chr4:46725790-46726563 (-) // 88.13 // p12
208674_x_at	DDOST	1650	0006412 // translation // traceable author statement///0006486 // protein glycosylation // inferred from sequence or structural similarity///0006487 // protein N-linked glycosylation // inferred from direct assay///0006614 // SRP-dependent cotranslational protein targeting to membrane // traceable author statement///0010467 // gene expression // traceable author statement///0018279 // protein N-l…	0005783 // endoplasmic reticulum // inferred from direct assay///0005789 // endoplasmic reticulum membrane // traceable author statement///0008250 // oligosaccharyltransferase complex // inferred from sequence or structural similarity///0008250 // oligosaccharyltransferase complex // traceable author statement///0016020 // membrane // inferred from direct assay///0016021 // integral component of …	0004576 // oligosaccharyl transferase activity // inferred from sequence or structural similarity///0004579 // dolichyl-diphosphooligosaccharide-protein glycotransferase activity // inferred by curator///0004579 // dolichyl-diphosphooligosaccharide-protein glycotransferase activity // inferred from direct assay///0005515 // protein binding // inferred from physical interaction///0016740 // transf…	chr1:20978272-20987944 (-) // 82.79 // p36.12
208675_s_at	DDOST	1650	0006412 // translation // traceable author statement///0006486 // protein glycosylation // inferred from sequence or structural similarity///0006487 // protein N-linked glycosylation // inferred from direct assay///0006614 // SRP-dependent cotranslational protein targeting to membrane // traceable author statement///0010467 // gene expression // traceable author statement///0018279 // protein N-l…	0005783 // endoplasmic reticulum // inferred from direct assay///0005789 // endoplasmic reticulum membrane // traceable author statement///0008250 // oligosaccharyltransferase complex // inferred from sequence or structural similarity///0008250 // oligosaccharyltransferase complex // traceable author statement///0016020 // membrane // inferred from direct assay///0016021 // integral component of …	0004576 // oligosaccharyl transferase activity // inferred from sequence or structural similarity///0004579 // dolichyl-diphosphooligosaccharide-protein glycotransferase activity // inferred by curator///0004579 // dolichyl-diphosphooligosaccharide-protein glycotransferase activity // inferred from direct assay///0005515 // protein binding // inferred from physical interaction///0016740 // transf…	chr1:20978680-20988000 (-) // 99.88 // p36.12
208714_at	NDUFV1	4723	0006120 // mitochondrial electron transport, NADH to ubiquinone // not recorded///0006120 // mitochondrial electron transport, NADH to ubiquinone // inferred by curator///0006120 // mitochondrial electron transport, NADH to ubiquinone // non-traceable author statement///0009060 // aerobic respiration // not recorded///0022904 // respiratory electron transport chain // traceable author statement//…	0005739 // mitochondrion // inferred from electronic annotation///0005743 // mitochondrial inner membrane // non-traceable author statement///0005743 // mitochondrial inner membrane // traceable author statement///0005747 // mitochondrial respiratory chain complex I // inferred from direct assay///0005747 // mitochondrial respiratory chain complex I // inferred from mutant phenotype///0005747 // …	0003954 // NADH dehydrogenase activity // not recorded///0005515 // protein binding // inferred from electronic annotation///0008137 // NADH dehydrogenase (ubiquinone) activity // non-traceable author statement///0010181 // FMN binding // not recorded///0016491 // oxidoreductase activity // inferred from electronic annotation///0016651 // oxidoreductase activity, acting on NAD(P)H // inferred fro…	chr11:67374397-67380005 (+) // 97.3 // q13.2
208782_at	FSTL1	11167	0030509 // BMP signaling pathway // traceable author statement///0042594 // response to starvation // inferred from electronic annotation	0005576 // extracellular region // traceable author statement///0005615 // extracellular space // inferred from direct assay///0070062 // extracellular exosome // inferred from direct assay	0005509 // calcium ion binding // inferred from electronic annotation///0005515 // protein binding // inferred from physical interaction///0008201 // heparin binding // inferred from electronic annotation	chr3:120113126-120169825 (-) // 96.42 // q13.33
209083_at	CORO1A	11151	0001771 // immunological synapse formation // inferred from mutant phenotype///0001845 // phagolysosome assembly // inferred from mutant phenotype///0006816 // calcium ion transport // inferred from electronic annotation///0006909 // phagocytosis // inferred from mutant phenotype///0006928 // movement of cell or subcellular component // non-traceable author statement///0007015 // actin filament o…	0001772 // immunological synapse // inferred from direct assay///0001891 // phagocytic cup // inferred from direct assay///0005634 // nucleus // inferred from direct assay///0005737 // cytoplasm // inferred from direct assay///0005769 // early endosome // inferred from electronic annotation///0005856 // cytoskeleton // inferred from electronic annotation///0005884 // actin filament // inferred fr…	0003779 // actin binding // inferred from physical interaction///0003785 // actin monomer binding // inferred from mutant phenotype///0005515 // protein binding // inferred from physical interaction///0008022 // protein C-terminus binding // inferred from physical interaction///0008092 // cytoskeletal protein binding // inferred from sequence or structural similarity///0032036 // myosin heavy cha…	chr16:30194955-30200396 (+) // 96.98 // p11.2
209124_at	MYD88	4615	0002224 // toll-like receptor signaling pathway // traceable author statement///0002238 // response to molecule of fungal origin // inferred from electronic annotation///0002376 // immune system process // inferred from electronic annotation///0002755 // MyD88-dependent toll-like receptor signaling pathway // traceable author statement///0006954 // inflammatory response // inferred from electroni…	0005737 // cytoplasm // inferred from electronic annotation///0005829 // cytosol // traceable author statement///0005886 // plasma membrane // traceable author statement///0010008 // endosome membrane // traceable author statement///0014069 // postsynaptic density // inferred from electronic annotation///0043234 // protein complex // inferred from electronic annotation	0005102 // receptor binding // inferred from electronic annotation///0005121 // Toll binding // inferred from electronic annotation///0005123 // death receptor binding // traceable author statement///0005149 // interleukin-1 receptor binding // inferred from electronic annotation///0005515 // protein binding // inferred from physical interaction///0042802 // identical protein binding // inferred …	chr3:38180190-38184510 (+) // 93.81 // p22.2
209179_s_at	MBOAT7	79143	0006629 // lipid metabolic process // inferred from electronic annotation///0006644 // phospholipid metabolic process // traceable author statement///0008654 // phospholipid biosynthetic process // inferred from electronic annotation///0021591 // ventricular system development // inferred from electronic annotation///0021819 // layer formation in cerebral cortex // inferred from electronic annota…	0005789 // endoplasmic reticulum membrane // traceable author statement///0016020 // membrane // inferred from direct assay///0016021 // integral component of membrane // inferred from electronic annotation	0005515 // protein binding // inferred from physical interaction///0016740 // transferase activity // inferred from electronic annotation///0016746 // transferase activity, transferring acyl groups // inferred from electronic annotation///0016747 // transferase activity, transferring acyl groups other than amino-acyl groups // inferred from electronic annotation///0071617 // lysophospholipid acyl…	chr19:54677108-54693416 (-) // 98.93 // q13.42
209219_at	NELFE	7936	0000122 // negative regulation of transcription from RNA polymerase II promoter // inferred from electronic annotation///0006351 // transcription, DNA-templated // inferred from electronic annotation///0006355 // regulation of transcription, DNA-templated // inferred from electronic annotation///0006366 // transcription from RNA polymerase II promoter // traceable author statement///0006368 // tr…	0005634 // nucleus // non-traceable author statement///0005654 // nucleoplasm // inferred from direct assay///0005654 // nucleoplasm // traceable author statement///0005739 // mitochondrion // inferred from direct assay///0032021 // NELF complex // inferred from direct assay	0000166 // nucleotide binding // inferred from electronic annotation///0003676 // nucleic acid binding // inferred from electronic annotation///0003682 // chromatin binding // inferred from electronic annotation///0003723 // RNA binding // non-traceable author statement///0003746 // translation elongation factor activity // inferred from electronic annotation///0005515 // protein binding // infer…	chr6:31920005-31926746 (-) // 88.24 // p21.33
209239_at	NFKB1	4790	0000122 // negative regulation of transcription from RNA polymerase II promoter // inferred by curator///0000122 // negative regulation of transcription from RNA polymerase II promoter // inferred from genetic interaction///0000122 // negative regulation of transcription from RNA polymerase II promoter // inferred from mutant phenotype///0001818 // negative regulation of cytokine production // in…	0005634 // nucleus // inferred from direct assay///0005654 // nucleoplasm // inferred from direct assay///0005654 // nucleoplasm // traceable author statement///0005737 // cytoplasm // inferred from direct assay///0005739 // mitochondrion // inferred from direct assay///0005829 // cytosol // not recorded///0005829 // cytosol // traceable author statement///0033256 // I-kappaB/NF-kappaB complex //…	0000975 // regulatory region DNA binding // inferred from direct assay///0000976 // transcription regulatory region sequence-specific DNA binding // inferred from direct assay///0000977 // RNA polymerase II regulatory region sequence-specific DNA binding // inferred from direct assay///0000980 // RNA polymerase II distal enhancer sequence-specific DNA binding // inferred from direct assay///00012…	chr4:103422779-103537857 (+) // 95.88 // q24
209306_s_at	SWAP70	23075	0007204 // positive regulation of cytosolic calcium ion concentration // inferred from electronic annotation///0008064 // regulation of actin polymerization or depolymerization // inferred from electronic annotation///0016444 // somatic cell DNA recombination // inferred from electronic annotation///0030835 // negative regulation of actin filament depolymerization // inferred from electronic anno…	0005634 // nucleus // inferred from electronic annotation///0005737 // cytoplasm // inferred from electronic annotation///0005829 // cytosol // inferred from electronic annotation///0005886 // plasma membrane // inferred from electronic annotation///0016020 // membrane // inferred from electronic annotation///0030027 // lamellipodium // inferred from electronic annotation///0042995 // cell projec…	0003677 // DNA binding // inferred from electronic annotation///0005509 // calcium ion binding // inferred from electronic annotation///0005515 // protein binding // inferred from physical interaction///0005524 // ATP binding // inferred from electronic annotation	chr11:9685631-9774501 (+) // 91.5 // p15.4
209307_at	SWAP70	23075	0007204 // positive regulation of cytosolic calcium ion concentration // inferred from electronic annotation///0008064 // regulation of actin polymerization or depolymerization // inferred from electronic annotation///0016444 // somatic cell DNA recombination // inferred from electronic annotation///0030835 // negative regulation of actin filament depolymerization // inferred from electronic anno…	0005634 // nucleus // inferred from electronic annotation///0005737 // cytoplasm // inferred from electronic annotation///0005829 // cytosol // inferred from electronic annotation///0005886 // plasma membrane // inferred from electronic annotation///0016020 // membrane // inferred from electronic annotation///0030027 // lamellipodium // inferred from electronic annotation///0042995 // cell projec…	0003677 // DNA binding // inferred from electronic annotation///0005509 // calcium ion binding // inferred from electronic annotation///0005515 // protein binding // inferred from physical interaction///0005524 // ATP binding // inferred from electronic annotation	chr11:9685631-9774501 (+) // 91.5 // p15.4
209341_s_at	IKBKB	3551	0001782 // B cell homeostasis // inferred from electronic annotation///0002223 // stimulatory C-type lectin receptor signaling pathway // traceable author statement///0002224 // toll-like receptor signaling pathway // traceable author statement///0002755 // MyD88-dependent toll-like receptor signaling pathway // traceable author statement///0002756 // MyD88-independent toll-like receptor signalin…	0005622 // intracellular // inferred from electronic annotation///0005634 // nucleus // inferred from electronic annotation///0005737 // cytoplasm // inferred from direct assay///0005829 // cytosol // traceable author statement///0008385 // IkappaB kinase complex // traceable author statement///0009898 // cytoplasmic side of plasma membrane // inferred from sequence or structural similarity///001…	0000166 // nucleotide binding // inferred from electronic annotation///0004672 // protein kinase activity // inferred from direct assay///0004674 // protein serine/threonine kinase activity // inferred from direct assay///0004674 // protein serine/threonine kinase activity // traceable author statement///0005515 // protein binding // inferred from physical interaction///0005524 // ATP binding // …	chr8:42128862-42190179 (+) // 93.8 // p11.21
209342_s_at	IKBKB	3551	0001782 // B cell homeostasis // inferred from electronic annotation///0002223 // stimulatory C-type lectin receptor signaling pathway // traceable author statement///0002224 // toll-like receptor signaling pathway // traceable author statement///0002755 // MyD88-dependent toll-like receptor signaling pathway // traceable author statement///0002756 // MyD88-independent toll-like receptor signalin…	0005622 // intracellular // inferred from electronic annotation///0005634 // nucleus // inferred from electronic annotation///0005737 // cytoplasm // inferred from direct assay///0005829 // cytosol // traceable author statement///0008385 // IkappaB kinase complex // traceable author statement///0009898 // cytoplasmic side of plasma membrane // inferred from sequence or structural similarity///001…	0000166 // nucleotide binding // inferred from electronic annotation///0004672 // protein kinase activity // inferred from direct assay///0004674 // protein serine/threonine kinase activity // inferred from direct assay///0004674 // protein serine/threonine kinase activity // traceable author statement///0005515 // protein binding // inferred from physical interaction///0005524 // ATP binding // …	chr8:42128862-42189126 (+) // 99.48 // p11.21
209367_at	STXBP2	6813	0001909 // leukocyte mediated cytotoxicity // inferred from mutant phenotype///0006810 // transport // inferred from electronic annotation///0006887 // exocytosis // inferred from electronic annotation///0006904 // vesicle docking involved in exocytosis // inferred from electronic annotation///0015031 // protein transport // inferred from electronic annotation///0016192 // vesicle-mediated transp…	0005623 // cell // inferred from electronic annotation///0005829 // cytosol // inferred from direct assay///0005886 // plasma membrane // inferred from direct assay///0016324 // apical plasma membrane // inferred from electronic annotation///0031201 // SNARE complex // inferred from direct assay///0042581 // specific granule // inferred from direct assay///0042582 // azurophil granule // inferred…	0005515 // protein binding // inferred from physical interaction///0017075 // syntaxin-1 binding // inferred from electronic annotation///0030348 // syntaxin-3 binding // inferred from physical interaction	chr19:7702020-7712759 (+) // 99.3 // p13.2
209395_at	CHI3L1	1116	0005975 // carbohydrate metabolic process // inferred from electronic annotation///0006032 // chitin catabolic process // not recorded///0006915 // apoptotic process // inferred from electronic annotation///0006954 // inflammatory response // inferred from expression pattern///0007250 // activation of NF-kappaB-inducing kinase activity // inferred from sequence or structural similarity///0009612 …	0005576 // extracellular region // not recorded///0005578 // proteinaceous extracellular matrix // non-traceable author statement///0005615 // extracellular space // inferred from direct assay///0005737 // cytoplasm // inferred from sequence or structural similarity///0005783 // endoplasmic reticulum // inferred from sequence or structural similarity///0048471 // perinuclear region of cytoplasm /…	0004553 // hydrolase activity, hydrolyzing O-glycosyl compounds // inferred from electronic annotation///0004568 // chitinase activity // inferred from direct assay///0005201 // extracellular matrix structural constituent // non-traceable author statement///0008061 // chitin binding // inferred from direct assay///0030246 // carbohydrate binding // inferred from electronic annotation	chr1:203148056-203155822 (-) // 99.43 // q32.1
209396_s_at	CHI3L1	1116	0005975 // carbohydrate metabolic process // inferred from electronic annotation///0006032 // chitin catabolic process // not recorded///0006915 // apoptotic process // inferred from electronic annotation///0006954 // inflammatory response // inferred from expression pattern///0007250 // activation of NF-kappaB-inducing kinase activity // inferred from sequence or structural similarity///0009612 …	0005576 // extracellular region // not recorded///0005578 // proteinaceous extracellular matrix // non-traceable author statement///0005615 // extracellular space // inferred from direct assay///0005737 // cytoplasm // inferred from sequence or structural similarity///0005783 // endoplasmic reticulum // inferred from sequence or structural similarity///0048471 // perinuclear region of cytoplasm /…	0004553 // hydrolase activity, hydrolyzing O-glycosyl compounds // inferred from electronic annotation///0004568 // chitinase activity // inferred from direct assay///0005201 // extracellular matrix structural constituent // non-traceable author statement///0008061 // chitin binding // inferred from direct assay///0030246 // carbohydrate binding // inferred from electronic annotation	chr1:203148056-203155822 (-) // 99.43 // q32.1
209499_x_at	TNFSF12-TNFSF13///TNFSF13	8741///407977	0001525 // angiogenesis // inferred from electronic annotation///0001938 // positive regulation of endothelial cell proliferation // traceable author statement///0002376 // immune system process // inferred from electronic annotation///0002426 // immunoglobulin production in mucosal tissue // inferred from electronic annotation///0002636 // positive regulation of germinal center formation // infe…	0005576 // extracellular region // traceable author statement///0005615 // extracellular space // inferred from electronic annotation///0005654 // nucleoplasm // traceable author statement///0005737 // cytoplasm // inferred from direct assay///0005829 // cytosol // traceable author statement///0005886 // plasma membrane // inferred from electronic annotation///0005886 // plasma membrane // tracea…	0005102 // receptor binding // traceable author statement///0005125 // cytokine activity // inferred from electronic annotation///0005164 // tumor necrosis factor receptor binding // inferred from electronic annotation///0005515 // protein binding // inferred from physical interaction///0005515 // protein binding // inferred from electronic annotation	chr17:7462084-7464918 (+) // 98.64 // p13.1
209500_x_at	TNFSF12-TNFSF13///TNFSF13	8741///407977	0001525 // angiogenesis // inferred from electronic annotation///0001938 // positive regulation of endothelial cell proliferation // traceable author statement///0002376 // immune system process // inferred from electronic annotation///0002426 // immunoglobulin production in mucosal tissue // inferred from electronic annotation///0002636 // positive regulation of germinal center formation // infe…	0005576 // extracellular region // traceable author statement///0005615 // extracellular space // inferred from electronic annotation///0005654 // nucleoplasm // traceable author statement///0005737 // cytoplasm // inferred from direct assay///0005829 // cytosol // traceable author statement///0005886 // plasma membrane // inferred from electronic annotation///0005886 // plasma membrane // tracea…	0005102 // receptor binding // traceable author statement///0005125 // cytokine activity // inferred from electronic annotation///0005164 // tumor necrosis factor receptor binding // inferred from electronic annotation///0005515 // protein binding // inferred from physical interaction///0005515 // protein binding // inferred from electronic annotation	chr17:7462159-7464917 (+) // 99.05 // p13.1
209508_x_at	CFLAR	8837	0006508 // proteolysis // inferred from electronic annotation///0006915 // apoptotic process // inferred from mutant phenotype///0006915 // apoptotic process // traceable author statement///0006919 // activation of cysteine-type endopeptidase activity involved in apoptotic process // not recorded///0007519 // skeletal muscle tissue development // inferred from sequence or structural similarity///…	0005737 // cytoplasm // inferred from direct assay///0005829 // cytosol // traceable author statement///0031264 // death-inducing signaling complex // inferred from direct assay///0031265 // CD95 death-inducing signaling complex // inferred from electronic annotation///0045121 // membrane raft // inferred from electronic annotation///0097342 // ripoptosome // inferred from direct assay	0002020 // protease binding // inferred from physical interaction///0004197 // cysteine-type endopeptidase activity // inferred from electronic annotation///0005123 // death receptor binding // inferred from electronic annotation///0005515 // protein binding // inferred from physical interaction///0008047 // enzyme activator activity // inferred from direct assay///0008234 // cysteine-type peptid…	chr2:201980907-202028840 (+) // 92.11 // q33.1
209532_at	PLAA	9373	0006644 // phospholipid metabolic process // traceable author statement///0006954 // inflammatory response // inferred from electronic annotation///0007165 // signal transduction // traceable author statement///0043085 // positive regulation of catalytic activity // inferred from electronic annotation	0070062 // extracellular exosome // inferred from direct assay	0005488 // binding // inferred from electronic annotation///0005515 // protein binding // inferred from physical interaction///0016005 // phospholipase A2 activator activity // inferred from electronic annotation	chr9:26904080-26947461 (-) // 92.36 // p21.2
209533_s_at	PLAA	9373	0006644 // phospholipid metabolic process // traceable author statement///0006954 // inflammatory response // inferred from electronic annotation///0007165 // signal transduction // traceable author statement///0043085 // positive regulation of catalytic activity // inferred from electronic annotation	0070062 // extracellular exosome // inferred from direct assay	0005488 // binding // inferred from electronic annotation///0005515 // protein binding // inferred from physical interaction///0016005 // phospholipase A2 activator activity // inferred from electronic annotation	chr9:26905342-26947259 (-) // 98.25 // p21.2
209687_at	CXCL12	6387	0001569 // patterning of blood vessels // inferred from electronic annotation///0001666 // response to hypoxia // inferred from electronic annotation///0001667 // ameboidal-type cell migration // inferred from electronic annotation///0001764 // neuron migration // inferred from electronic annotation///0001938 // positive regulation of endothelial cell proliferation // inferred from electronic ann…	0005576 // extracellular region // traceable author statement///0005615 // extracellular space // inferred from electronic annotation///0005886 // plasma membrane // inferred from electronic annotation///0009897 // external side of plasma membrane // not recorded///0070062 // extracellular exosome // inferred from direct assay	0005102 // receptor binding // traceable author statement///0005125 // cytokine activity // inferred from electronic annotation///0008009 // chemokine activity // inferred from direct assay///0008009 // chemokine activity // traceable author statement///0008083 // growth factor activity // inferred from electronic annotation///0042056 // chemoattractant activity // not recorded///0042379 // chemo…	chr10:44872580-44880557 (-) // 81.46 // q11.21
209698_at	CCHCR1	54535	0006611 // protein export from nucleus // inferred from electronic annotation///0007275 // multicellular organismal development // inferred from electronic annotation///0030154 // cell differentiation // inferred from electronic annotation	0005634 // nucleus // inferred from electronic annotation///0005737 // cytoplasm // inferred from direct assay///0005814 // centriole // inferred from direct assay	0005515 // protein binding // inferred from physical interaction	chr6:31110216-31124681 (-) // 99.63 // p21.33
209716_at	CSF1	1435	0001503 // ossification // inferred from electronic annotation///0001954 // positive regulation of cell-matrix adhesion // inferred from sequence or structural similarity///0002158 // osteoclast proliferation // inferred from electronic annotation///0002376 // immune system process // inferred from electronic annotation///0003006 // developmental process involved in reproduction // inferred from …	0005576 // extracellular region // inferred from electronic annotation///0005615 // extracellular space // inferred from direct assay///0005886 // plasma membrane // inferred from electronic annotation///0016020 // membrane // non-traceable author statement///0016021 // integral component of membrane // inferred from electronic annotation///0043235 // receptor complex // inferred from electronic …	0005125 // cytokine activity // inferred from direct assay///0005157 // macrophage colony-stimulating factor receptor binding // inferred from sequence or structural similarity///0005157 // macrophage colony-stimulating factor receptor binding // traceable author statement///0005515 // protein binding // inferred from physical interaction///0008083 // growth factor activity // inferred from direc…	chr1:110453500-110473615 (+) // 97.89 // p13.3
209732_at	CLEC2B	9976	0050776 // regulation of immune response // traceable author statement	0005886 // plasma membrane // traceable author statement///0005887 // integral component of plasma membrane // traceable author statement///0016020 // membrane // inferred from electronic annotation///0016021 // integral component of membrane // inferred from electronic annotation	0030246 // carbohydrate binding // inferred from electronic annotation	chr12:10005804-10021952 (-) // 96.79 // p13.31
209770_at	BTN3A1	11119	0002250 // adaptive immune response // inferred from electronic annotation///0002376 // immune system process // inferred from electronic annotation///0050663 // cytokine secretion // inferred from direct assay///0050798 // activated T cell proliferation // inferred from mutant phenotype///0050852 // T cell receptor signaling pathway // inferred from direct assay///0072643 // interferon-gamma sec…	0005886 // plasma membrane // inferred from direct assay///0016020 // membrane // inferred from electronic annotation///0016021 // integral component of membrane // inferred from electronic annotation	0005515 // protein binding // inferred from physical interaction	chr6:26402535-26415435 (+) // 77.0 // p22.2
209774_x_at	CXCL2	2920	0002237 // response to molecule of bacterial origin // inferred from direct assay///0002690 // positive regulation of leukocyte chemotaxis // not recorded///0006935 // chemotaxis // traceable author statement///0006954 // inflammatory response // inferred from electronic annotation///0006955 // immune response // not recorded///0007186 // G-protein coupled receptor signaling pathway // not record…	0005576 // extracellular region // traceable author statement///0005615 // extracellular space // inferred from electronic annotation	0005125 // cytokine activity // inferred from electronic annotation///0005515 // protein binding // inferred from physical interaction///0008009 // chemokine activity // inferred from electronic annotation///0045236 // CXCR chemokine receptor binding // not recorded	chr4:74962800-74964892 (-) // 95.02 // q13.3
209835_x_at	CD44	960	0001658 // branching involved in ureteric bud morphogenesis // inferred from electronic annotation///0002246 // wound healing involved in inflammatory response // inferred from electronic annotation///0005975 // carbohydrate metabolic process // traceable author statement///0007155 // cell adhesion // inferred from electronic annotation///0007160 // cell-matrix adhesion // non-traceable author st…	0005737 // cytoplasm // inferred from direct assay///0005794 // Golgi apparatus // inferred from direct assay///0005886 // plasma membrane // inferred from direct assay///0005886 // plasma membrane // traceable author statement///0005887 // integral component of plasma membrane // non-traceable author statement///0005925 // focal adhesion // inferred from direct assay///0009897 // external side o…	0004415 // hyalurononglucosaminidase activity // inferred from direct assay///0004896 // cytokine receptor activity // inferred from direct assay///0005515 // protein binding // inferred from physical interaction///0005518 // collagen binding // non-traceable author statement///0005540 // hyaluronic acid binding // inferred from direct assay///0005540 // hyaluronic acid binding // non-traceable a…	chr11:35160728-35251015 (+) // 98.62 // p13
209879_at	SELPLG	6404	0007155 // cell adhesion // traceable author statement///0007596 // blood coagulation // traceable author statement///0016032 // viral process // inferred from electronic annotation///0046718 // viral entry into host cell // inferred from electronic annotation///0050900 // leukocyte migration // traceable author statement///0050901 // leukocyte tethering or rolling // inferred from electronic ann…	0001931 // uropod // inferred from direct assay///0005886 // plasma membrane // inferred from direct assay///0005886 // plasma membrane // traceable author statement///0005887 // integral component of plasma membrane // traceable author statement///0016020 // membrane // traceable author statement///0016021 // integral component of membrane // traceable author statement	0001618 // virus receptor activity // inferred from electronic annotation///0005102 // receptor binding // non-traceable author statement///0005515 // protein binding // inferred from physical interaction///0030246 // carbohydrate binding // inferred from electronic annotation	chr12:109015685-109027670 (-) // 96.34 // q24.11
209880_s_at	SELPLG	6404	0007155 // cell adhesion // traceable author statement///0007596 // blood coagulation // traceable author statement///0016032 // viral process // inferred from electronic annotation///0046718 // viral entry into host cell // inferred from electronic annotation///0050900 // leukocyte migration // traceable author statement///0050901 // leukocyte tethering or rolling // inferred from electronic ann…	0001931 // uropod // inferred from direct assay///0005886 // plasma membrane // inferred from direct assay///0005886 // plasma membrane // traceable author statement///0005887 // integral component of plasma membrane // traceable author statement///0016020 // membrane // traceable author statement///0016021 // integral component of membrane // traceable author statement	0001618 // virus receptor activity // inferred from electronic annotation///0005102 // receptor binding // non-traceable author statement///0005515 // protein binding // inferred from physical interaction///0030246 // carbohydrate binding // inferred from electronic annotation	chr12:109016463-109027569 (-) // 99.94 // q24.11
209906_at	C3AR1	719	0002430 // complement receptor mediated signaling pathway // inferred from electronic annotation///0002462 // tolerance induction to nonself antigen // inferred from electronic annotation///0006935 // chemotaxis // inferred from electronic annotation///0006954 // inflammatory response // traceable author statement///0007165 // signal transduction // inferred from electronic annotation///0007186 /…	0005829 // cytosol // inferred from electronic annotation///0005829 // cytosol // inferred from genetic interaction///0005829 // cytosol // traceable author statement///0005886 // plasma membrane // traceable author statement///0005887 // integral component of plasma membrane // traceable author statement///0016020 // membrane // inferred from electronic annotation///0016021 // integral component…	0001850 // complement component C3a binding // inferred from electronic annotation///0004435 // phosphatidylinositol phospholipase C activity // traceable author statement///0004871 // signal transducer activity // inferred from electronic annotation///0004876 // complement component C3a receptor activity // traceable author statement///0004930 // G-protein coupled receptor activity // inferred f…	chr12:8210911-8219009 (-) // 90.0 // p13.31
209933_s_at	CD300A	11314	0002376 // immune system process // inferred from electronic annotation///0007155 // cell adhesion // inferred from electronic annotation///0007165 // signal transduction // inferred from direct assay///0030889 // negative regulation of B cell proliferation // inferred from mutant phenotype///0032516 // positive regulation of phosphoprotein phosphatase activity // inferred from direct assay///003…	0005886 // plasma membrane // traceable author statement///0016020 // membrane // inferred from direct assay///0016021 // integral component of membrane // inferred from electronic annotation///0070062 // extracellular exosome // inferred from direct assay	0001786 // phosphatidylserine binding // inferred from direct assay///0005515 // protein binding // inferred from physical interaction///0008429 // phosphatidylethanolamine binding // inferred from direct assay///0038023 // signaling receptor activity // inferred from direct assay	chr17:72462766-72480931 (+) // 92.91 // q25.1
209939_x_at	CFLAR	8837	0006508 // proteolysis // inferred from electronic annotation///0006915 // apoptotic process // inferred from mutant phenotype///0006915 // apoptotic process // traceable author statement///0006919 // activation of cysteine-type endopeptidase activity involved in apoptotic process // not recorded///0007519 // skeletal muscle tissue development // inferred from sequence or structural similarity///…	0005737 // cytoplasm // inferred from direct assay///0005829 // cytosol // traceable author statement///0031264 // death-inducing signaling complex // inferred from direct assay///0031265 // CD95 death-inducing signaling complex // inferred from electronic annotation///0045121 // membrane raft // inferred from electronic annotation///0097342 // ripoptosome // inferred from direct assay	0002020 // protease binding // inferred from physical interaction///0004197 // cysteine-type endopeptidase activity // inferred from electronic annotation///0005123 // death receptor binding // inferred from electronic annotation///0005515 // protein binding // inferred from physical interaction///0008047 // enzyme activator activity // inferred from direct assay///0008234 // cysteine-type peptid…	chr2:201994588-202005162 (+) // 72.42 // q33.1
209941_at	RIPK1	8737	0001934 // positive regulation of protein phosphorylation // inferred from mutant phenotype///0002224 // toll-like receptor signaling pathway // traceable author statement///0002756 // MyD88-independent toll-like receptor signaling pathway // traceable author statement///0006468 // protein phosphorylation // inferred from electronic annotation///0006915 // apoptotic process // inferred from mutan…	0005737 // cytoplasm // inferred from direct assay///0005739 // mitochondrion // inferred from direct assay///0005829 // cytosol // traceable author statement///0005886 // plasma membrane // inferred from electronic annotation///0016020 // membrane // inferred from electronic annotation///0031264 // death-inducing signaling complex // inferred from direct assay///0043234 // protein complex // inf…	0000166 // nucleotide binding // inferred from electronic annotation///0004672 // protein kinase activity // inferred from direct assay///0004672 // protein kinase activity // inferred from mutant phenotype///0004674 // protein serine/threonine kinase activity // inferred from direct assay///0005123 // death receptor binding // inferred from physical interaction///0005515 // protein binding // in…	chr6:3077057-3114174 (+) // 94.76 // p25.2
209970_x_at	CASP1	834	0001666 // response to hypoxia // inferred from electronic annotation///0006508 // proteolysis // inferred from direct assay///0006915 // apoptotic process // traceable author statement///0006919 // activation of cysteine-type endopeptidase activity involved in apoptotic process // traceable author statement///0007165 // signal transduction // traceable author statement///0009617 // response to b…	0005576 // extracellular region // inferred from electronic annotation///0005737 // cytoplasm // not recorded///0005739 // mitochondrion // inferred from electronic annotation///0005829 // cytosol // traceable author statement///0072557 // IPAF inflammasome complex // not recorded///0072557 // IPAF inflammasome complex // inferred from sequence or structural similarity///0072558 // NLRP1 inflamma…	0004175 // endopeptidase activity // inferred from direct assay///0004197 // cysteine-type endopeptidase activity // traceable author statement///0005515 // protein binding // inferred from physical interaction///0008233 // peptidase activity // inferred from electronic annotation///0008234 // cysteine-type peptidase activity // inferred from electronic annotation///0008656 // cysteine-type endop…	chr11:104896238-104905857 (-) // 98.4 // q22.3
210007_s_at	GPD2	2820	0006072 // glycerol-3-phosphate metabolic process // inferred from electronic annotation///0006094 // gluconeogenesis // inferred from electronic annotation///0019563 // glycerol catabolic process // inferred from electronic annotation///0035264 // multicellular organism growth // inferred from electronic annotation///0043010 // camera-type eye development // inferred from electronic annotation//…	0005739 // mitochondrion // inferred from electronic annotation///0005743 // mitochondrial inner membrane // traceable author statement///0009331 // glycerol-3-phosphate dehydrogenase complex // inferred from electronic annotation	0004368 // glycerol-3-phosphate dehydrogenase activity // traceable author statement///0005509 // calcium ion binding // inferred from electronic annotation///0016491 // oxidoreductase activity // inferred from electronic annotation///0046872 // metal ion binding // inferred from electronic annotation///0052590 // sn-glycerol-3-phosphate:ubiquinone oxidoreductase activity // inferred from electro…	chr2:157292221-157439772 (+) // 98.43 // q24.1
210010_s_at	SLC25A1	6576	0005975 // carbohydrate metabolic process // traceable author statement///0006006 // glucose metabolic process // traceable author statement///0006094 // gluconeogenesis // traceable author statement///0006810 // transport // inferred from electronic annotation///0015746 // citrate transport // traceable author statement///0019432 // triglyceride biosynthetic process // traceable author statement…	0005634 // nucleus // inferred from direct assay///0005739 // mitochondrion // inferred from electronic annotation///0005743 // mitochondrial inner membrane // traceable author statement///0016020 // membrane // inferred from electronic annotation///0016021 // integral component of membrane // inferred from electronic annotation///0070062 // extracellular exosome // inferred from direct assay	0015137 // citrate transmembrane transporter activity // traceable author statement	chr22:19163119-19166260 (-) // 95.24 // q11.21
210025_s_at	CARD10	29775	0006461 // protein complex assembly // non-traceable author statement///0007250 // activation of NF-kappaB-inducing kinase activity // inferred from direct assay///0007250 // activation of NF-kappaB-inducing kinase activity // inferred from sequence or structural similarity///0042981 // regulation of apoptotic process // inferred from electronic annotation	0005737 // cytoplasm // non-traceable author statement///0032449 // CBM complex // non-traceable author statement	0005515 // protein binding // inferred from physical interaction///0030159 // receptor signaling complex scaffold activity // non-traceable author statement	chr22:37886399-37915247 (-) // 94.76 // q13.1
210026_s_at	CARD10	29775	0006461 // protein complex assembly // non-traceable author statement///0007250 // activation of NF-kappaB-inducing kinase activity // inferred from direct assay///0007250 // activation of NF-kappaB-inducing kinase activity // inferred from sequence or structural similarity///0042981 // regulation of apoptotic process // inferred from electronic annotation	0005737 // cytoplasm // non-traceable author statement///0032449 // CBM complex // non-traceable author statement	0005515 // protein binding // inferred from physical interaction///0030159 // receptor signaling complex scaffold activity // non-traceable author statement	chr22:37886402-37915247 (-) // 96.91 // q13.1
210037_s_at	NOS2	4843	0001666 // response to hypoxia // inferred from electronic annotation///0001912 // positive regulation of leukocyte mediated cytotoxicity // traceable author statement///0002227 // innate immune response in mucosa // non-traceable author statement///0006527 // arginine catabolic process // inferred from direct assay///0006801 // superoxide metabolic process // inferred from sequence or structural…	0005622 // intracellular // inferred from direct assay///0005634 // nucleus // inferred from sequence or structural similarity///0005737 // cytoplasm // inferred from direct assay///0005777 // peroxisome // inferred from direct assay///0005829 // cytosol // inferred from mutant phenotype///0005829 // cytosol // traceable author statement///0030863 // cortical cytoskeleton // inferred from electro…	0003958 // NADPH-hemoprotein reductase activity // not recorded///0004517 // nitric-oxide synthase activity // inferred from direct assay///0005102 // receptor binding // inferred from physical interaction///0005506 // iron ion binding // inferred from electronic annotation///0005515 // protein binding // inferred from physical interaction///0005516 // calmodulin binding // inferred from electron…	chr17:26084214-26125910 (-) // 99.92 // q11.2
210081_at	AGER	177	0001666 // response to hypoxia // inferred from electronic annotation///0001933 // negative regulation of protein phosphorylation // inferred from electronic annotation///0001934 // positive regulation of protein phosphorylation // inferred from electronic annotation///0001937 // negative regulation of endothelial cell proliferation // inferred from electronic annotation///0006954 // inflammatory…	0005576 // extracellular region // inferred from electronic annotation///0005615 // extracellular space // inferred from electronic annotation///0005737 // cytoplasm // inferred from electronic annotation///0005829 // cytosol // inferred from electronic annotation///0005886 // plasma membrane // traceable author statement///0005887 // integral component of plasma membrane // traceable author stat…	0004872 // receptor activity // traceable author statement///0004888 // transmembrane signaling receptor activity // traceable author statement///0005515 // protein binding // inferred from physical interaction///0042802 // identical protein binding // inferred from physical interaction///0044548 // S100 protein binding // inferred from physical interaction///0050785 // advanced glycation end-pro…	chr6:32148890-32152023 (-) // 99.92 // p21.32
210083_at	SEMA7A	8482	0001649 // osteoblast differentiation // inferred from direct assay///0001755 // neural crest cell migration // not recorded///0001934 // positive regulation of protein phosphorylation // inferred from electronic annotation///0006954 // inflammatory response // inferred from electronic annotation///0006955 // immune response // traceable author statement///0007229 // integrin-mediated signaling p…	0005615 // extracellular space // not recorded///0005886 // plasma membrane // traceable author statement///0009897 // external side of plasma membrane // not recorded///0009897 // external side of plasma membrane // inferred from sequence or structural similarity///0016020 // membrane // inferred from direct assay///0031225 // anchored component of membrane // inferred from electronic annotation	0005178 // integrin binding // not recorded///0005515 // protein binding // inferred from physical interaction///0030215 // semaphorin receptor binding // not recorded///0038191 // neuropilin binding // not recorded///0045499 // chemorepellent activity // not recorded	chr15:74702376-74726259 (-) // 97.76 // q24.1
210118_s_at	IL1A	3552	0001660 // fever generation // inferred from electronic annotation///0002248 // connective tissue replacement involved in inflammatory response wound healing // inferred from electronic annotation///0002437 // inflammatory response to antigenic stimulus // ---///0006915 // apoptotic process // traceable author statement///0006954 // inflammatory response // traceable author statement///0006955 //…	0005576 // extracellular region // traceable author statement///0005615 // extracellular space // inferred from direct assay///0005615 // extracellular space // inferred from mutant phenotype///0005829 // cytosol // inferred from direct assay	0005125 // cytokine activity // inferred from mutant phenotype///0005149 // interleukin-1 receptor binding // inferred from electronic annotation///0005507 // copper ion binding // inferred from direct assay///0005515 // protein binding // inferred from physical interaction	chr2:113531779-113541352 (-) // 80.0 // q13
210133_at	CCL11	6356	0001938 // positive regulation of endothelial cell proliferation // inferred from direct assay///0002544 // chronic inflammatory response // inferred from electronic annotation///0002548 // monocyte chemotaxis // not recorded///0002551 // mast cell chemotaxis // inferred from electronic annotation///0006468 // protein phosphorylation // traceable author statement///0006874 // cellular calcium ion…	0005576 // extracellular region // inferred from direct assay///0005576 // extracellular region // traceable author statement///0005615 // extracellular space // not recorded///0005622 // intracellular // inferred from electronic annotation///0005623 // cell // traceable author statement	0005125 // cytokine activity // inferred from electronic annotation///0005515 // protein binding // inferred from physical interaction///0008009 // chemokine activity // inferred from direct assay///0048020 // CCR chemokine receptor binding // not recorded	chr17:32612778-32615124 (+) // 89.1 // q12
210160_at	PAFAH1B2	5049	0006629 // lipid metabolic process // traceable author statement///0007283 // spermatogenesis // inferred from electronic annotation///0007420 // brain development // not recorded///0008152 // metabolic process // inferred from electronic annotation///0008152 // metabolic process // ---///0016042 // lipid catabolic process // inferred from electronic annotation///0016239 // positive regulation of…	0005730 // nucleolus // inferred from direct assay///0005737 // cytoplasm // inferred from direct assay///0005737 // cytoplasm // traceable author statement///0005829 // cytosol // inferred from electronic annotation///0005886 // plasma membrane // inferred from direct assay///0070062 // extracellular exosome // inferred from direct assay	0003847 // 1-alkyl-2-acetylglycerophosphocholine esterase activity // inferred from electronic annotation///0005515 // protein binding // inferred from electronic annotation///0016787 // hydrolase activity // inferred from electronic annotation///0042803 // protein homodimerization activity // inferred from electronic annotation///0046982 // protein heterodimerization activity // inferred from el…	chr11:117015023-117038748 (+) // 97.19 // q23.3
210166_at	TLR5	7100	0001819 // positive regulation of cytokine production // inferred from electronic annotation///0002224 // toll-like receptor signaling pathway // traceable author statement///0002376 // immune system process // inferred from electronic annotation///0002755 // MyD88-dependent toll-like receptor signaling pathway // traceable author statement///0006954 // inflammatory response // inferred from elec…	0005886 // plasma membrane // traceable author statement///0016020 // membrane // inferred from electronic annotation///0016021 // integral component of membrane // inferred from electronic annotation	0004888 // transmembrane signaling receptor activity // inferred from electronic annotation///0005149 // interleukin-1 receptor binding // inferred from physical interaction///0005515 // protein binding // inferred from electronic annotation	chr1:223283646-223316624 (-) // 94.58 // q41
210182_at	CORT	1325	0000278 // mitotic cell cycle // traceable author statement///0000712 // resolution of meiotic recombination intermediates // inferred from mutant phenotype///0006281 // DNA repair // inferred from direct assay///0006281 // DNA repair // inferred from electronic annotation///0006281 // DNA repair // traceable author statement///0006334 // nucleosome assembly // traceable author statement///000697…	0000775 // chromosome, centromeric region // inferred from electronic annotation///0000776 // kinetochore // inferred from electronic annotation///0000777 // condensed chromosome kinetochore // inferred from electronic annotation///0005576 // extracellular region // inferred from electronic annotation///0005615 // extracellular space // non-traceable author statement///0005634 // nucleus // infer…	0001664 // G-protein coupled receptor binding // inferred from physical interaction///0003677 // DNA binding // inferred from direct assay///0003677 // DNA binding // inferred from electronic annotation///0003682 // chromatin binding // inferred from direct assay///0003690 // double-stranded DNA binding // inferred from direct assay///0005179 // hormone activity // inferred from electronic annota…	chr1:10510275-10511697 (+) // 98.91 // p36.22
210194_at	PLA2R1	22925	0001816 // cytokine production // inferred from mutant phenotype///0006897 // endocytosis // inferred from electronic annotation///0006898 // receptor-mediated endocytosis // inferred from direct assay///0043517 // positive regulation of DNA damage response, signal transduction by p53 class mediator // inferred from mutant phenotype///0072593 // reactive oxygen species metabolic process // inferr…	0005576 // extracellular region // inferred from sequence or structural similarity///0005576 // extracellular region // non-traceable author statement///0005886 // plasma membrane // inferred from direct assay///0005887 // integral component of plasma membrane // non-traceable author statement///0009986 // cell surface // inferred from direct assay///0016020 // membrane // inferred from electroni…	0004872 // receptor activity // inferred from direct assay///0030246 // carbohydrate binding // inferred from electronic annotation///0043274 // phospholipase binding // inferred from physical interaction	chr2:160797259-160919121 (-) // 98.53 // q24.2
210228_at	CSF2	1437	0000165 // MAPK cascade // traceable author statement///0000186 // activation of MAPKK activity // traceable author statement///0001892 // embryonic placenta development // inferred from electronic annotation///0006955 // immune response // inferred from electronic annotation///0007173 // epidermal growth factor receptor signaling pathway // traceable author statement///0007264 // small GTPase me…	0005576 // extracellular region // traceable author statement///0005615 // extracellular space // inferred from electronic annotation///0005622 // intracellular // traceable author statement	0005125 // cytokine activity // inferred from electronic annotation///0005129 // granulocyte macrophage colony-stimulating factor receptor binding // inferred from electronic annotation///0005515 // protein binding // inferred from physical interaction///0008083 // growth factor activity // inferred from electronic annotation	chr5:131409485-131411859 (-) // 88.86 // q31.1
210229_s_at	CSF2	1437	0000165 // MAPK cascade // traceable author statement///0000186 // activation of MAPKK activity // traceable author statement///0001892 // embryonic placenta development // inferred from electronic annotation///0006955 // immune response // inferred from electronic annotation///0007173 // epidermal growth factor receptor signaling pathway // traceable author statement///0007264 // small GTPase me…	0005576 // extracellular region // traceable author statement///0005615 // extracellular space // inferred from electronic annotation///0005622 // intracellular // traceable author statement	0005125 // cytokine activity // inferred from electronic annotation///0005129 // granulocyte macrophage colony-stimulating factor receptor binding // inferred from electronic annotation///0005515 // protein binding // inferred from physical interaction///0008083 // growth factor activity // inferred from electronic annotation	chr5:131409501-131411600 (+) // 99.6 // q31.1
210354_at	IFNG	3458	0000060 // protein import into nucleus, translocation // inferred from direct assay///0000122 // negative regulation of transcription from RNA polymerase II promoter // inferred from sequence or structural similarity///0001781 // neutrophil apoptotic process // inferred from electronic annotation///0002026 // regulation of the force of heart contraction // inferred from electronic annotation///00…	0005576 // extracellular region // inferred from direct assay///0005576 // extracellular region // traceable author statement///0005615 // extracellular space // not recorded///0005622 // intracellular // inferred from direct assay///0009897 // external side of plasma membrane // inferred from electronic annotation	0005125 // cytokine activity // not recorded///0005133 // interferon-gamma receptor binding // inferred from electronic annotation///0005515 // protein binding // inferred from electronic annotation	chr12:68548773-68553522 (-) // 93.76 // q15
210357_s_at	SMOX	54498	0006595 // polyamine metabolic process // traceable author statement///0006596 // polyamine biosynthetic process // traceable author statement///0006598 // polyamine catabolic process // inferred from direct assay///0006805 // xenobiotic metabolic process // traceable author statement///0034641 // cellular nitrogen compound metabolic process // traceable author statement///0044281 // small molecu…	0005634 // nucleus // inferred from direct assay///0005634 // nucleus // inferred from electronic annotation///0005737 // cytoplasm // inferred from direct assay///0005829 // cytosol // traceable author statement	0016491 // oxidoreductase activity // inferred from electronic annotation///0046592 // polyamine oxidase activity // inferred from direct assay///0052894 // norspermine:oxygen oxidoreductase activity // inferred from electronic annotation///0052895 // N1-acetylspermine:oxygen oxidoreductase (N1-acetylspermidine-forming) activity // inferred from electronic annotation///0052901 // spermine:oxygen …	chr20:4129507-4168368 (+) // 98.54 // p13
210367_s_at	PTGES	9536	0001516 // prostaglandin biosynthetic process // inferred from direct assay///0002526 // acute inflammatory response // inferred from electronic annotation///0002544 // chronic inflammatory response // inferred from electronic annotation///0006629 // lipid metabolic process // inferred from electronic annotation///0006631 // fatty acid metabolic process // inferred from electronic annotation///00…	0005641 // nuclear envelope lumen // inferred from electronic annotation///0005737 // cytoplasm // inferred from electronic annotation///0005789 // endoplasmic reticulum membrane // traceable author statement///0016020 // membrane // traceable author statement///0016021 // integral component of membrane // inferred from direct assay///0043231 // intracellular membrane-bounded organelle // inferre…	0016853 // isomerase activity // inferred from electronic annotation///0043295 // glutathione binding // inferred from direct assay///0050220 // prostaglandin-E synthase activity // not recorded///0050220 // prostaglandin-E synthase activity // inferred from direct assay	chr9:132500628-132515300 (-) // 67.9 // q34.11
210369_at	SWAP70	23075	0007204 // positive regulation of cytosolic calcium ion concentration // inferred from electronic annotation///0008064 // regulation of actin polymerization or depolymerization // inferred from electronic annotation///0016444 // somatic cell DNA recombination // inferred from electronic annotation///0030835 // negative regulation of actin filament depolymerization // inferred from electronic anno…	0005634 // nucleus // inferred from electronic annotation///0005737 // cytoplasm // inferred from electronic annotation///0005829 // cytosol // inferred from electronic annotation///0005886 // plasma membrane // inferred from electronic annotation///0016020 // membrane // inferred from electronic annotation///0030027 // lamellipodium // inferred from electronic annotation///0042995 // cell projec…	0003677 // DNA binding // inferred from electronic annotation///0005509 // calcium ion binding // inferred from electronic annotation///0005515 // protein binding // inferred from physical interaction///0005524 // ATP binding // inferred from electronic annotation	chr11:9685681-9763485 (+) // 94.84 // p15.4
210422_x_at	SLC11A1	6556	0000060 // protein import into nucleus, translocation // inferred from electronic annotation///0001818 // negative regulation of cytokine production // inferred from sequence or structural similarity///0001819 // positive regulation of cytokine production // inferred from sequence or structural similarity///0002309 // T cell proliferation involved in immune response // inferred from sequence or s…	0005764 // lysosome // inferred from sequence or structural similarity///0005770 // late endosome // inferred from sequence or structural similarity///0005886 // plasma membrane // inferred from mutant phenotype///0005887 // integral component of plasma membrane // non-traceable author statement///0009279 // cell outer membrane // inferred from electronic annotation///0010008 // endosome membrane…	0005215 // transporter activity // inferred from electronic annotation///0005384 // manganese ion transmembrane transporter activity // inferred from sequence or structural similarity///0042803 // protein homodimerization activity // inferred from direct assay///0046915 // transition metal ion transmembrane transporter activity // inferred from genetic interaction///0051139 // metal ion:proton an…	chr2:219246916-219260497 (+) // 78.16 // q35
210423_s_at	SLC11A1	6556	0000060 // protein import into nucleus, translocation // inferred from electronic annotation///0001818 // negative regulation of cytokine production // inferred from sequence or structural similarity///0001819 // positive regulation of cytokine production // inferred from sequence or structural similarity///0002309 // T cell proliferation involved in immune response // inferred from sequence or s…	0005764 // lysosome // inferred from sequence or structural similarity///0005770 // late endosome // inferred from sequence or structural similarity///0005886 // plasma membrane // inferred from mutant phenotype///0005887 // integral component of plasma membrane // non-traceable author statement///0009279 // cell outer membrane // inferred from electronic annotation///0010008 // endosome membrane…	0005215 // transporter activity // inferred from electronic annotation///0005384 // manganese ion transmembrane transporter activity // inferred from sequence or structural similarity///0042803 // protein homodimerization activity // inferred from direct assay///0046915 // transition metal ion transmembrane transporter activity // inferred from genetic interaction///0051139 // metal ion:proton an…	chr2:219247024-219260031 (+) // 87.34 // q35
210449_x_at	MAPK14	1432	0000077 // DNA damage checkpoint // inferred from electronic annotation///0000165 // MAPK cascade // inferred from electronic annotation///0000187 // activation of MAPK activity // traceable author statement///0000902 // cell morphogenesis // inferred from electronic annotation///0001502 // cartilage condensation // inferred from electronic annotation///0001525 // angiogenesis // inferred from el…	0000922 // spindle pole // inferred from electronic annotation///0005622 // intracellular // inferred from electronic annotation///0005623 // cell // inferred from electronic annotation///0005634 // nucleus // inferred from sequence or structural similarity///0005654 // nucleoplasm // inferred from direct assay///0005654 // nucleoplasm // traceable author statement///0005737 // cytoplasm // infer…	0000166 // nucleotide binding // inferred from electronic annotation///0004672 // protein kinase activity // inferred from electronic annotation///0004674 // protein serine/threonine kinase activity // traceable author statement///0004707 // MAP kinase activity // inferred from direct assay///0004708 // MAP kinase kinase activity // traceable author statement///0005515 // protein binding // infer…	chr6:35995919-36076261 (+) // 100.0 // p21.31
210495_x_at	FN1	2335	0001525 // angiogenesis // inferred from electronic annotation///0001932 // regulation of protein phosphorylation // inferred from direct assay///0002576 // platelet degranulation // traceable author statement///0006953 // acute-phase response // inferred from electronic annotation///0007044 // cell-substrate junction assembly // inferred from electronic annotation///0007155 // cell adhesion // n…	0005576 // extracellular region // non-traceable author statement///0005576 // extracellular region // traceable author statement///0005577 // fibrinogen complex // inferred from direct assay///0005578 // proteinaceous extracellular matrix // inferred from electronic annotation///0005604 // basement membrane // inferred from electronic annotation///0005605 // basal lamina // inferred from electro…	0002020 // protease binding // inferred from physical interaction///0005178 // integrin binding // inferred from direct assay///0005178 // integrin binding // inferred from mutant phenotype///0005178 // integrin binding // inferred from physical interaction///0005515 // protein binding // inferred from physical interaction///0005518 // collagen binding // non-traceable author statement///0008201 …	chr2:216225588-216240415 (-) // 89.45 // q35
210520_at	LOC105374258	105374258				chr3:186358148-186370797 (-) // 99.27 // q27.3
210521_s_at	FETUB	26998	0007338 // single fertilization // inferred from sequence or structural similarity///0007339 // binding of sperm to zona pellucida // not recorded///0007339 // binding of sperm to zona pellucida // inferred from sequence or structural similarity///0010466 // negative regulation of peptidase activity // inferred from electronic annotation///0010951 // negative regulation of endopeptidase activity …	0005576 // extracellular region // not recorded///0005615 // extracellular space // inferred from electronic annotation///0070062 // extracellular exosome // inferred from direct assay	0004857 // enzyme inhibitor activity // inferred from electronic annotation///0004869 // cysteine-type endopeptidase inhibitor activity // inferred from electronic annotation///0008191 // metalloendopeptidase inhibitor activity // not recorded///0008191 // metalloendopeptidase inhibitor activity // inferred from sequence or structural similarity///0030414 // peptidase inhibitor activity // inferr…	chr3:186358150-186370472 (+) // 100.0 // q27.3
210557_x_at	CSF1	1435	0001954 // positive regulation of cell-matrix adhesion // inferred from sequence or structural similarity///0002158 // osteoclast proliferation // inferred from electronic annotation///0002376 // immune system process // inferred from electronic annotation///0003006 // developmental process involved in reproduction // inferred from sequence or structural similarity///0006954 // inflammatory respo…	0005576 // extracellular region // inferred from electronic annotation///0005615 // extracellular space // inferred from direct assay///0005886 // plasma membrane // inferred from electronic annotation///0016020 // membrane // non-traceable author statement///0016021 // integral component of membrane // inferred from electronic annotation///0048471 // perinuclear region of cytoplasm // inferred f…	0005125 // cytokine activity // inferred from direct assay///0005157 // macrophage colony-stimulating factor receptor binding // inferred from sequence or structural similarity///0005157 // macrophage colony-stimulating factor receptor binding // traceable author statement///0005515 // protein binding // inferred from physical interaction///0008083 // growth factor activity // inferred from direc…	chr1:110456879-110471656 (+) // 99.25 // p13.3
210563_x_at	CFLAR	8837	0006508 // proteolysis // inferred from electronic annotation///0006915 // apoptotic process // inferred from mutant phenotype///0006915 // apoptotic process // traceable author statement///0006919 // activation of cysteine-type endopeptidase activity involved in apoptotic process // not recorded///0007519 // skeletal muscle tissue development // inferred from sequence or structural similarity///…	0005737 // cytoplasm // inferred from direct assay///0005829 // cytosol // traceable author statement///0031264 // death-inducing signaling complex // inferred from direct assay///0031265 // CD95 death-inducing signaling complex // inferred from electronic annotation///0045121 // membrane raft // inferred from electronic annotation///0097342 // ripoptosome // inferred from direct assay	0002020 // protease binding // inferred from physical interaction///0004197 // cysteine-type endopeptidase activity // inferred from electronic annotation///0005123 // death receptor binding // inferred from electronic annotation///0005515 // protein binding // inferred from physical interaction///0008047 // enzyme activator activity // inferred from direct assay///0008234 // cysteine-type peptid…	chr2:201994311-202005162 (+) // 83.15 // q33.1
210564_x_at	CFLAR	8837	0006508 // proteolysis // inferred from electronic annotation///0006915 // apoptotic process // inferred from mutant phenotype///0006915 // apoptotic process // traceable author statement///0006919 // activation of cysteine-type endopeptidase activity involved in apoptotic process // not recorded///0007519 // skeletal muscle tissue development // inferred from sequence or structural similarity///…	0005737 // cytoplasm // inferred from direct assay///0005829 // cytosol // traceable author statement///0031264 // death-inducing signaling complex // inferred from direct assay///0031265 // CD95 death-inducing signaling complex // inferred from electronic annotation///0045121 // membrane raft // inferred from electronic annotation///0097342 // ripoptosome // inferred from direct assay	0002020 // protease binding // inferred from physical interaction///0004197 // cysteine-type endopeptidase activity // inferred from electronic annotation///0005123 // death receptor binding // inferred from electronic annotation///0005515 // protein binding // inferred from physical interaction///0008047 // enzyme activator activity // inferred from direct assay///0008234 // cysteine-type peptid…	chr2:201994588-202028696 (+) // 99.89 // q33.1
210569_s_at	SIGLEC9	27180	0007155 // cell adhesion // inferred from electronic annotation///0007166 // cell surface receptor signaling pathway // non-traceable author statement///0050776 // regulation of immune response // traceable author statement	0005886 // plasma membrane // traceable author statement///0005887 // integral component of plasma membrane // non-traceable author statement///0016020 // membrane // inferred from electronic annotation///0016021 // integral component of membrane // inferred from electronic annotation	0005515 // protein binding // inferred from electronic annotation///0030246 // carbohydrate binding // non-traceable author statement	chr19:51628220-51633455 (+) // 99.87 // q13.41
210629_x_at	LST1	7940	0000902 // cell morphogenesis // inferred from electronic annotation///0002376 // immune system process // inferred from electronic annotation///0006955 // immune response // non-traceable author statement///0008360 // regulation of cell shape // inferred from electronic annotation///0009653 // anatomical structure morphogenesis // non-traceable author statement///0016358 // dendrite development …	0000139 // Golgi membrane // inferred from electronic annotation///0005737 // cytoplasm // inferred from direct assay///0005794 // Golgi apparatus // non-traceable author statement///0012505 // endomembrane system // inferred from electronic annotation///0016020 // membrane // inferred from electronic annotation///0016021 // integral component of membrane // inferred from direct assay		chr6:31553977-31556587 (+) // 85.23 // p21.33
210659_at	CMKLR1	1240	0001501 // skeletal system development // traceable author statement///0006935 // chemotaxis // inferred from direct assay///0006955 // immune response // traceable author statement///0007165 // signal transduction // inferred from electronic annotation///0007186 // G-protein coupled receptor signaling pathway // inferred from direct assay///0007186 // G-protein coupled receptor signaling pathway…	0005886 // plasma membrane // inferred from direct assay///0005887 // integral component of plasma membrane // traceable author statement///0016020 // membrane // inferred from electronic annotation///0016021 // integral component of membrane // non-traceable author statement	0004871 // signal transducer activity // inferred from electronic annotation///0004872 // receptor activity // traceable author statement///0004930 // G-protein coupled receptor activity // non-traceable author statement///0004950 // chemokine receptor activity // traceable author statement///0005515 // protein binding // inferred from physical interaction	chr12:108684669-108733076 (-) // 97.27 // q23.3
210702_s_at	PTGIS	5740	0001516 // prostaglandin biosynthetic process // inferred from direct assay///0006629 // lipid metabolic process // inferred from electronic annotation///0006631 // fatty acid metabolic process // inferred from electronic annotation///0006633 // fatty acid biosynthetic process // inferred from electronic annotation///0006690 // icosanoid metabolic process // traceable author statement///0006693 /…	0005615 // extracellular space // inferred from sequence or structural similarity///0005634 // nucleus // inferred from direct assay///0005737 // cytoplasm // inferred from electronic annotation///0005783 // endoplasmic reticulum // inferred from direct assay///0005789 // endoplasmic reticulum membrane // traceable author statement///0005901 // caveola // inferred from direct assay///0016020 // m…	0004497 // monooxygenase activity // inferred from electronic annotation///0005506 // iron ion binding // inferred from electronic annotation///0005515 // protein binding // inferred from physical interaction///0008116 // prostaglandin-I synthase activity // inferred from direct assay///0016705 // oxidoreductase activity, acting on paired donors, with incorporation or reduction of molecular oxyge…	chr20:48124009-48184680 (-) // 97.22 // q13.13
210724_at	ADGRE3	84658	0007165 // signal transduction // inferred from electronic annotation///0007166 // cell surface receptor signaling pathway // inferred from electronic annotation///0007186 // G-protein coupled receptor signaling pathway // inferred from electronic annotation	0005576 // extracellular region // inferred from electronic annotation///0005615 // extracellular space // inferred from electronic annotation///0005639 // integral component of nuclear inner membrane // inferred from electronic annotation///0005886 // plasma membrane // inferred from electronic annotation///0016020 // membrane // inferred from electronic annotation///0016021 // integral componen…	0004871 // signal transducer activity // inferred from electronic annotation///0004888 // transmembrane signaling receptor activity // inferred from electronic annotation///0004930 // G-protein coupled receptor activity // inferred from electronic annotation///0005509 // calcium ion binding // inferred from electronic annotation///0005515 // protein binding // inferred from electronic annotation	chr19:14730051-14785667 (-) // 99.51 // p13.12
210726_at	CYP3A4	1576	0006629 // lipid metabolic process // traceable author statement///0006706 // steroid catabolic process // inferred from mutant phenotype///0006805 // xenobiotic metabolic process // traceable author statement///0008202 // steroid metabolic process // inferred from mutant phenotype///0008209 // androgen metabolic process // traceable author statement///0009822 // alkaloid catabolic process // inf…	0005737 // cytoplasm // inferred from direct assay///0005783 // endoplasmic reticulum // inferred from electronic annotation///0005789 // endoplasmic reticulum membrane // traceable author statement///0016020 // membrane // inferred from electronic annotation///0016020 // membrane // traceable author statement///0016021 // integral component of membrane // inferred from electronic annotation///00…	0004497 // monooxygenase activity // inferred from direct assay///0004497 // monooxygenase activity // inferred from sequence or structural similarity///0005496 // steroid binding // inferred from direct assay///0005506 // iron ion binding // inferred from direct assay///0008395 // steroid hydroxylase activity // inferred from mutant phenotype///0016491 // oxidoreductase activity // inferred from…	chr7:99354582-99381772 (-) // 83.68 // q22.1
210744_s_at	IL5RA	3568	0000165 // MAPK cascade // traceable author statement///0000186 // activation of MAPKK activity // traceable author statement///0002437 // inflammatory response to antigenic stimulus // inferred from electronic annotation///0007165 // signal transduction // traceable author statement///0007173 // epidermal growth factor receptor signaling pathway // traceable author statement///0007264 // small G…	0005615 // extracellular space // traceable author statement///0005622 // intracellular // traceable author statement///0005886 // plasma membrane // traceable author statement///0005895 // interleukin-5 receptor complex // non-traceable author statement///0016020 // membrane // inferred from electronic annotation///0016021 // integral component of membrane // inferred from electronic annotation	0004896 // cytokine receptor activity // inferred from electronic annotation///0004914 // interleukin-5 receptor activity // traceable author statement///0005515 // protein binding // inferred from physical interaction	chr3:3131856-3151664 (-) // 89.83 // p26.2
210853_at	SCN11A	11280	0006810 // transport // inferred from electronic annotation///0006811 // ion transport // inferred from electronic annotation///0006814 // sodium ion transport // traceable author statement///0019228 // neuronal action potential // not recorded///0034765 // regulation of ion transmembrane transport // inferred from electronic annotation///0035725 // sodium ion transmembrane transport // not recor…	0001518 // voltage-gated sodium channel complex // inferred from electronic annotation///0005886 // plasma membrane // not recorded///0016020 // membrane // inferred from electronic annotation///0016021 // integral component of membrane // inferred from electronic annotation///0030424 // axon // inferred from electronic annotation///0044299 // C-fiber // inferred from electronic annotation///0070…	0005216 // ion channel activity // inferred from electronic annotation///0005244 // voltage-gated ion channel activity // inferred from electronic annotation///0005248 // voltage-gated sodium channel activity // not recorded///0005272 // sodium channel activity // inferred from electronic annotation	chr3:38890775-38992052 (-) // 98.69 // p22.2
210904_s_at	IL13RA1	3597	0002639 // positive regulation of immunoglobulin production // inferred from electronic annotation///0007166 // cell surface receptor signaling pathway // traceable author statement///0019221 // cytokine-mediated signaling pathway // inferred from electronic annotation///0030890 // positive regulation of B cell proliferation // inferred from electronic annotation///0035772 // interleukin-13-media…	0005886 // plasma membrane // traceable author statement///0005898 // interleukin-13 receptor complex // traceable author statement///0016020 // membrane // inferred from electronic annotation///0016021 // integral component of membrane // inferred from electronic annotation	0004896 // cytokine receptor activity // inferred from electronic annotation///0005515 // protein binding // inferred from physical interaction///0016515 // interleukin-13 receptor activity // inferred from electronic annotation	chrX:117861564-117895482 (+) // 97.18 // q24
210916_s_at	CD44	960	0001658 // branching involved in ureteric bud morphogenesis // inferred from electronic annotation///0002246 // wound healing involved in inflammatory response // inferred from electronic annotation///0005975 // carbohydrate metabolic process // traceable author statement///0007155 // cell adhesion // inferred from electronic annotation///0007160 // cell-matrix adhesion // non-traceable author st…	0005737 // cytoplasm // inferred from direct assay///0005794 // Golgi apparatus // inferred from direct assay///0005886 // plasma membrane // inferred from direct assay///0005886 // plasma membrane // traceable author statement///0005887 // integral component of plasma membrane // non-traceable author statement///0005925 // focal adhesion // inferred from direct assay///0009897 // external side o…	0004415 // hyalurononglucosaminidase activity // inferred from direct assay///0004896 // cytokine receptor activity // inferred from direct assay///0005515 // protein binding // inferred from physical interaction///0005518 // collagen binding // non-traceable author statement///0005540 // hyaluronic acid binding // inferred from direct assay///0005540 // hyaluronic acid binding // non-traceable a…	chr11:35160832-35250880 (+) // 100.0 // p13
210992_x_at	FCGR2C	9103	0006955 // immune response // non-traceable author statement///0007165 // signal transduction // non-traceable author statement	0005737 // cytoplasm // inferred from electronic annotation///0005886 // plasma membrane // inferred from electronic annotation///0016020 // membrane // inferred from electronic annotation///0016021 // integral component of membrane // non-traceable author statement	0004888 // transmembrane signaling receptor activity // non-traceable author statement///0005515 // protein binding // inferred from physical interaction///0019864 // IgG binding // inferred from electronic annotation	chr1:161551225-161569618 (+) // 91.46 // q23.3
210993_s_at	SMAD1	4086	0000165 // MAPK cascade // inferred from electronic annotation///0001657 // ureteric bud development // inferred from electronic annotation///0001710 // mesodermal cell fate commitment // inferred from electronic annotation///0001822 // kidney development // inferred from electronic annotation///0002051 // osteoblast fate commitment // inferred from electronic annotation///0006351 // transcriptio…	0005622 // intracellular // non-traceable author statement///0005634 // nucleus // inferred from direct assay///0005634 // nucleus // non-traceable author statement///0005634 // nucleus // traceable author statement///0005637 // nuclear inner membrane // inferred from direct assay///0005654 // nucleoplasm // traceable author statement///0005667 // transcription factor complex // inferred from ele…	0000978 // RNA polymerase II core promoter proximal region sequence-specific DNA binding // inferred from direct assay///0000979 // RNA polymerase II core promoter sequence-specific DNA binding // inferred from electronic annotation///0001077 // transcriptional activator activity, RNA polymerase II core promoter proximal region sequence-specific binding // inferred from direct assay///0003677 // …	chr4:146403956-146479106 (+) // 99.94 // q31.21
211011_at	COL19A1	1310	0001501 // skeletal system development // traceable author statement///0007155 // cell adhesion // non-traceable author statement///0007275 // multicellular organismal development // inferred from electronic annotation///0007517 // muscle organ development // inferred from electronic annotation///0007519 // skeletal muscle tissue development // inferred from electronic annotation///0016337 // sin…	0005576 // extracellular region // traceable author statement///0005578 // proteinaceous extracellular matrix // non-traceable author statement///0005581 // collagen trimer // non-traceable author statement///0005788 // endoplasmic reticulum lumen // traceable author statement	0005201 // extracellular matrix structural constituent // non-traceable author statement///0030674 // protein binding, bridging // non-traceable author statement	chr6:70576447-70917153 (+) // 98.55 // q13
211027_s_at	IKBKB	3551	0001782 // B cell homeostasis // inferred from electronic annotation///0002223 // stimulatory C-type lectin receptor signaling pathway // traceable author statement///0002224 // toll-like receptor signaling pathway // traceable author statement///0002755 // MyD88-dependent toll-like receptor signaling pathway // traceable author statement///0002756 // MyD88-independent toll-like receptor signalin…	0005622 // intracellular // inferred from electronic annotation///0005634 // nucleus // inferred from electronic annotation///0005737 // cytoplasm // inferred from direct assay///0005829 // cytosol // traceable author statement///0008385 // IkappaB kinase complex // traceable author statement///0009898 // cytoplasmic side of plasma membrane // inferred from sequence or structural similarity///001…	0000166 // nucleotide binding // inferred from electronic annotation///0004672 // protein kinase activity // inferred from direct assay///0004674 // protein serine/threonine kinase activity // inferred from direct assay///0004674 // protein serine/threonine kinase activity // traceable author statement///0005515 // protein binding // inferred from physical interaction///0005524 // ATP binding // …	chr8:42128832-42210602 (+) // 74.49 // p11.21
211028_s_at	KHK	3795	0005975 // carbohydrate metabolic process // traceable author statement///0006000 // fructose metabolic process // traceable author statement///0009744 // response to sucrose // inferred from electronic annotation///0009749 // response to glucose // inferred from electronic annotation///0009750 // response to fructose // inferred from electronic annotation///0010043 // response to zinc ion // inf…	0005634 // nucleus // inferred from electronic annotation///0005737 // cytoplasm // inferred from direct assay///0005829 // cytosol // traceable author statement///0070062 // extracellular exosome // inferred from direct assay	0000166 // nucleotide binding // inferred from electronic annotation///0004454 // ketohexokinase activity // not recorded///0004454 // ketohexokinase activity // inferred from direct assay///0005515 // protein binding // inferred from physical interaction///0005524 // ATP binding // inferred from electronic annotation///0008865 // fructokinase activity // inferred from direct assay///0016301 // k…	chr2:27309672-27322836 (+) // 98.12 // p23.3
211032_at	COBLL1	22837	0030041 // actin filament polymerization // not recorded///0051639 // actin filament network formation // not recorded	0070062 // extracellular exosome // inferred from direct assay	0003779 // actin binding // inferred from electronic annotation///0003785 // actin monomer binding // not recorded	chr2:165599965-165698650 (-) // 97.11 // q24.3
211037_s_at	MBOAT7	79143	0006629 // lipid metabolic process // inferred from electronic annotation///0006644 // phospholipid metabolic process // traceable author statement///0008654 // phospholipid biosynthetic process // inferred from electronic annotation///0021591 // ventricular system development // inferred from electronic annotation///0021819 // layer formation in cerebral cortex // inferred from electronic annota…	0005789 // endoplasmic reticulum membrane // traceable author statement///0016020 // membrane // inferred from direct assay///0016021 // integral component of membrane // inferred from electronic annotation	0005515 // protein binding // inferred from physical interaction///0016740 // transferase activity // inferred from electronic annotation///0016746 // transferase activity, transferring acyl groups // inferred from electronic annotation///0016747 // transferase activity, transferring acyl groups other than amino-acyl groups // inferred from electronic annotation///0071617 // lysophospholipid acyl…	chr19:54682055-54693524 (-) // 81.23 // q13.42
211087_x_at	MAPK14	1432	0000165 // MAPK cascade // inferred from electronic annotation///0000187 // activation of MAPK activity // traceable author statement///0002224 // toll-like receptor signaling pathway // traceable author statement///0002755 // MyD88-dependent toll-like receptor signaling pathway // traceable author statement///0002756 // MyD88-independent toll-like receptor signaling pathway // traceable author s…	0005622 // intracellular // inferred from electronic annotation///0005634 // nucleus // inferred from sequence or structural similarity///0005654 // nucleoplasm // inferred from direct assay///0005654 // nucleoplasm // traceable author statement///0005737 // cytoplasm // inferred from sequence or structural similarity///0005829 // cytosol // traceable author statement///0070062 // extracellular e…	0000166 // nucleotide binding // inferred from electronic annotation///0004672 // protein kinase activity // inferred from electronic annotation///0004674 // protein serine/threonine kinase activity // traceable author statement///0004707 // MAP kinase activity // inferred from direct assay///0004708 // MAP kinase kinase activity // traceable author statement///0005515 // protein binding // infer…	chr6:36043622-36043739 (+) // 66.1 // p21.31
211110_s_at	AR	367	0001701 // in utero embryonic development // inferred from electronic annotation///0003073 // regulation of systemic arterial blood pressure // inferred from electronic annotation///0003382 // epithelial cell morphogenesis // inferred from electronic annotation///0006351 // transcription, DNA-templated // inferred from direct assay///0006355 // regulation of transcription, DNA-templated // inferr…	0000790 // nuclear chromatin // inferred from direct assay///0005634 // nucleus // inferred from direct assay///0005654 // nucleoplasm // traceable author statement///0005737 // cytoplasm // inferred from direct assay///0005829 // cytosol // traceable author statement///0005886 // plasma membrane // inferred from electronic annotation///0016020 // membrane // inferred from electronic annotation//…	0000978 // RNA polymerase II core promoter proximal region sequence-specific DNA binding // inferred from direct assay///0001077 // transcriptional activator activity, RNA polymerase II core promoter proximal region sequence-specific binding // inferred from direct assay///0001085 // RNA polymerase II transcription factor binding // inferred from physical interaction///0003677 // DNA binding // n…	chrX:66764985-66943786 (+) // 95.19 // q12
211151_x_at	GH1	2688	0002092 // positive regulation of receptor internalization // inferred from direct assay///0007259 // JAK-STAT cascade // inferred from direct assay///0010535 // positive regulation of activation of JAK2 kinase activity // inferred from direct assay///0014068 // positive regulation of phosphatidylinositol 3-kinase signaling // inferred from direct assay///0015758 // glucose transport // inferred …	0005576 // extracellular region // traceable author statement///0005615 // extracellular space // inferred from direct assay///0005622 // intracellular // inferred from direct assay///0005622 // intracellular // traceable author statement	0005131 // growth hormone receptor binding // inferred from direct assay///0005131 // growth hormone receptor binding // inferred from physical interaction///0005148 // prolactin receptor binding // inferred from direct assay///0005148 // prolactin receptor binding // inferred from physical interaction///0005179 // hormone activity // inferred from electronic annotation///0005515 // protein bindi…	chr17:61994578-61996154 (-) // 100.0 // q23.3
211241_at	ANXA2P3	305				chr10:66585284-66586634 (+) // 96.99 // q21.3
211249_at	GPR68	8111	0006954 // inflammatory response // traceable author statement///0007165 // signal transduction // inferred from electronic annotation///0007186 // G-protein coupled receptor signaling pathway // inferred from electronic annotation///0032024 // positive regulation of insulin secretion // inferred from electronic annotation///0035774 // positive regulation of insulin secretion involved in cellular…	0005886 // plasma membrane // traceable author statement///0005887 // integral component of plasma membrane // traceable author statement///0016020 // membrane // inferred from electronic annotation///0016021 // integral component of membrane // inferred from electronic annotation	0004871 // signal transducer activity // inferred from electronic annotation///0004930 // G-protein coupled receptor activity // inferred from electronic annotation	chr14:91700211-91701494 (-) // 99.61 // q32.11
211252_x_at	PTCRA	171558		0016020 // membrane // inferred from electronic annotation///0016021 // integral component of membrane // inferred from electronic annotation	0005515 // protein binding // inferred from physical interaction	chr6:42883726-42893573 (+) // 99.63 // p21.1
211266_s_at	GPR4	2828	0007165 // signal transduction // inferred from electronic annotation///0007186 // G-protein coupled receptor signaling pathway // inferred from electronic annotation	0005886 // plasma membrane // traceable author statement///0005887 // integral component of plasma membrane // traceable author statement///0016020 // membrane // inferred from electronic annotation///0016021 // integral component of membrane // inferred from electronic annotation	0004871 // signal transducer activity // inferred from electronic annotation///0004930 // G-protein coupled receptor activity // inferred from electronic annotation	chr19:46093998-46095319 (-) // 93.26 // q13.32
211277_x_at	APP	351	0001878 // response to yeast // inferred from mutant phenotype///0002576 // platelet degranulation // traceable author statement///0006378 // mRNA polyadenylation // inferred from sequence or structural similarity///0006417 // regulation of translation // inferred from sequence or structural similarity///0006468 // protein phosphorylation // inferred from sequence or structural similarity///00065…	0005576 // extracellular region // traceable author statement///0005615 // extracellular space // inferred from direct assay///0005641 // nuclear envelope lumen // inferred from direct assay///0005737 // cytoplasm // inferred from direct assay///0005737 // cytoplasm // inferred from sequence or structural similarity///0005768 // endosome // inferred from direct assay///0005794 // Golgi apparatus …	0003677 // DNA binding // inferred from sequence or structural similarity///0004867 // serine-type endopeptidase inhibitor activity // inferred from direct assay///0005102 // receptor binding // inferred from physical interaction///0005515 // protein binding // inferred from physical interaction///0008201 // heparin binding // inferred from electronic annotation///0008233 // peptidase activity //…	chr21:26968486-27543064 (-) // 65.5 // q21.3
211316_x_at	CFLAR	8837	0006508 // proteolysis // inferred from electronic annotation///0006915 // apoptotic process // inferred from mutant phenotype///0006915 // apoptotic process // traceable author statement///0006919 // activation of cysteine-type endopeptidase activity involved in apoptotic process // not recorded///0007519 // skeletal muscle tissue development // inferred from sequence or structural similarity///…	0005737 // cytoplasm // inferred from direct assay///0005829 // cytosol // traceable author statement///0031264 // death-inducing signaling complex // inferred from direct assay///0031265 // CD95 death-inducing signaling complex // inferred from electronic annotation///0045121 // membrane raft // inferred from electronic annotation///0097342 // ripoptosome // inferred from direct assay	0002020 // protease binding // inferred from physical interaction///0004197 // cysteine-type endopeptidase activity // inferred from electronic annotation///0005123 // death receptor binding // inferred from electronic annotation///0005515 // protein binding // inferred from physical interaction///0008047 // enzyme activator activity // inferred from direct assay///0008234 // cysteine-type peptid…	chr2:201980929-202029002 (+) // 85.51 // q33.1
211317_s_at	CFLAR	8837	0006508 // proteolysis // inferred from electronic annotation///0006915 // apoptotic process // inferred from mutant phenotype///0006915 // apoptotic process // traceable author statement///0006919 // activation of cysteine-type endopeptidase activity involved in apoptotic process // not recorded///0007519 // skeletal muscle tissue development // inferred from sequence or structural similarity///…	0005737 // cytoplasm // inferred from direct assay///0005829 // cytosol // traceable author statement///0031264 // death-inducing signaling complex // inferred from direct assay///0031265 // CD95 death-inducing signaling complex // inferred from electronic annotation///0045121 // membrane raft // inferred from electronic annotation///0097342 // ripoptosome // inferred from direct assay	0002020 // protease binding // inferred from physical interaction///0004197 // cysteine-type endopeptidase activity // inferred from electronic annotation///0005123 // death receptor binding // inferred from electronic annotation///0005515 // protein binding // inferred from physical interaction///0008047 // enzyme activator activity // inferred from direct assay///0008234 // cysteine-type peptid…	chr2:201994676-202028610 (+) // 93.09 // q33.1
211361_s_at	SERPINB13	5275	0009411 // response to UV // traceable author statement///0010466 // negative regulation of peptidase activity // inferred from electronic annotation///0010951 // negative regulation of endopeptidase activity // inferred from direct assay///0030162 // regulation of proteolysis // non-traceable author statement///1902173 // negative regulation of keratinocyte apoptotic process // inferred from mut…	0005615 // extracellular space // not recorded///0005654 // nucleoplasm // inferred from direct assay///0005730 // nucleolus // inferred from direct assay///0005737 // cytoplasm // inferred from direct assay///0016020 // membrane // inferred from electronic annotation///0016021 // integral component of membrane // inferred from electronic annotation///0070062 // extracellular exosome // inferred …	0002020 // protease binding // inferred from physical interaction///0004867 // serine-type endopeptidase inhibitor activity // inferred from direct assay///0004867 // serine-type endopeptidase inhibitor activity // non-traceable author statement///0004869 // cysteine-type endopeptidase inhibitor activity // inferred from direct assay///0004869 // cysteine-type endopeptidase inhibitor activity // …	chr18:61254599-61265981 (+) // 69.52 // q21.33
211362_s_at	SERPINB13	5275	0009411 // response to UV // traceable author statement///0010466 // negative regulation of peptidase activity // inferred from electronic annotation///0010951 // negative regulation of endopeptidase activity // inferred from direct assay///0030162 // regulation of proteolysis // non-traceable author statement///1902173 // negative regulation of keratinocyte apoptotic process // inferred from mut…	0005615 // extracellular space // not recorded///0005654 // nucleoplasm // inferred from direct assay///0005730 // nucleolus // inferred from direct assay///0005737 // cytoplasm // inferred from direct assay///0016020 // membrane // inferred from electronic annotation///0016021 // integral component of membrane // inferred from electronic annotation///0070062 // extracellular exosome // inferred …	0002020 // protease binding // inferred from physical interaction///0004867 // serine-type endopeptidase inhibitor activity // inferred from direct assay///0004867 // serine-type endopeptidase inhibitor activity // non-traceable author statement///0004869 // cysteine-type endopeptidase inhibitor activity // inferred from direct assay///0004869 // cysteine-type endopeptidase inhibitor activity // …	chr18:61255882-61264670 (+) // 98.91 // q21.33
211366_x_at	CASP1	834	0001666 // response to hypoxia // inferred from electronic annotation///0006508 // proteolysis // inferred from direct assay///0006915 // apoptotic process // traceable author statement///0006919 // activation of cysteine-type endopeptidase activity involved in apoptotic process // traceable author statement///0007165 // signal transduction // traceable author statement///0009617 // response to b…	0005576 // extracellular region // inferred from electronic annotation///0005737 // cytoplasm // not recorded///0005739 // mitochondrion // inferred from electronic annotation///0005829 // cytosol // traceable author statement///0072557 // IPAF inflammasome complex // not recorded///0072557 // IPAF inflammasome complex // inferred from sequence or structural similarity///0072558 // NLRP1 inflamma…	0004175 // endopeptidase activity // inferred from direct assay///0004197 // cysteine-type endopeptidase activity // traceable author statement///0005515 // protein binding // inferred from physical interaction///0008233 // peptidase activity // inferred from electronic annotation///0008234 // cysteine-type peptidase activity // inferred from electronic annotation///0008656 // cysteine-type endop…	chr11:104896951-104905202 (-) // 99.28 // q22.3
211367_s_at	CASP1	834	0001666 // response to hypoxia // inferred from electronic annotation///0006508 // proteolysis // inferred from direct assay///0006915 // apoptotic process // traceable author statement///0006919 // activation of cysteine-type endopeptidase activity involved in apoptotic process // traceable author statement///0007165 // signal transduction // traceable author statement///0009617 // response to b…	0005576 // extracellular region // inferred from electronic annotation///0005737 // cytoplasm // not recorded///0005739 // mitochondrion // inferred from electronic annotation///0005829 // cytosol // traceable author statement///0072557 // IPAF inflammasome complex // not recorded///0072557 // IPAF inflammasome complex // inferred from sequence or structural similarity///0072558 // NLRP1 inflamma…	0004175 // endopeptidase activity // inferred from direct assay///0004197 // cysteine-type endopeptidase activity // traceable author statement///0005515 // protein binding // inferred from physical interaction///0008233 // peptidase activity // inferred from electronic annotation///0008234 // cysteine-type peptidase activity // inferred from electronic annotation///0008656 // cysteine-type endop…	chr11:104896951-104905202 (-) // 99.15 // q22.3
211368_s_at	CASP1	834	0001666 // response to hypoxia // inferred from electronic annotation///0006508 // proteolysis // inferred from direct assay///0006915 // apoptotic process // traceable author statement///0006919 // activation of cysteine-type endopeptidase activity involved in apoptotic process // traceable author statement///0007165 // signal transduction // traceable author statement///0009617 // response to b…	0005576 // extracellular region // inferred from electronic annotation///0005737 // cytoplasm // not recorded///0005739 // mitochondrion // inferred from electronic annotation///0005829 // cytosol // traceable author statement///0072557 // IPAF inflammasome complex // not recorded///0072557 // IPAF inflammasome complex // inferred from sequence or structural similarity///0072558 // NLRP1 inflamma…	0004175 // endopeptidase activity // inferred from direct assay///0004197 // cysteine-type endopeptidase activity // traceable author statement///0005515 // protein binding // inferred from physical interaction///0008233 // peptidase activity // inferred from electronic annotation///0008234 // cysteine-type peptidase activity // inferred from electronic annotation///0008656 // cysteine-type endop…	chr11:104896951-104905202 (-) // 97.67 // q22.3
211387_x_at	RNGTT	8732	0006366 // transcription from RNA polymerase II promoter // traceable author statement///0006370 // 7-methylguanosine mRNA capping // inferred from direct assay///0006370 // 7-methylguanosine mRNA capping // traceable author statement///0006396 // RNA processing // inferred from direct assay///0006397 // mRNA processing // inferred from electronic annotation///0006470 // protein dephosphorylation…	0005634 // nucleus // traceable author statement///0005654 // nucleoplasm // traceable author statement	0000166 // nucleotide binding // inferred from electronic annotation///0003824 // catalytic activity // inferred from electronic annotation///0004484 // mRNA guanylyltransferase activity // inferred from direct assay///0004651 // polynucleotide 5'-phosphatase activity // traceable author statement///0004725 // protein tyrosine phosphatase activity // inferred from electronic annotation///0005525 …	chr6:89387712-89673280 (-) // 86.54 // q15
211395_x_at	FCGR2C	9103	0006955 // immune response // non-traceable author statement///0007165 // signal transduction // non-traceable author statement	0005737 // cytoplasm // inferred from electronic annotation///0005886 // plasma membrane // inferred from electronic annotation///0016020 // membrane // inferred from electronic annotation///0016021 // integral component of membrane // non-traceable author statement	0004888 // transmembrane signaling receptor activity // non-traceable author statement///0005515 // protein binding // inferred from physical interaction///0019864 // IgG binding // inferred from electronic annotation	chr1:161551225-161569618 (+) // 92.35 // q23.3
211396_at	FCGR2C	9103	0006955 // immune response // non-traceable author statement///0007165 // signal transduction // non-traceable author statement	0005737 // cytoplasm // inferred from electronic annotation///0005886 // plasma membrane // inferred from electronic annotation///0016020 // membrane // inferred from electronic annotation///0016021 // integral component of membrane // non-traceable author statement	0004888 // transmembrane signaling receptor activity // non-traceable author statement///0005515 // protein binding // inferred from physical interaction///0019864 // IgG binding // inferred from electronic annotation	chr1:161551225-161562032 (+) // 91.81 // q23.3
211422_at	TRPM3	80036	0006810 // transport // inferred from electronic annotation///0006811 // ion transport // inferred from electronic annotation///0006812 // cation transport // inferred from direct assay///0006816 // calcium ion transport // inferred from electronic annotation///0016048 // detection of temperature stimulus // inferred from electronic annotation///0034220 // ion transmembrane transport // traceable…	0005886 // plasma membrane // traceable author statement///0016020 // membrane // inferred from electronic annotation///0016021 // integral component of membrane // inferred from electronic annotation	0005216 // ion channel activity // inferred from electronic annotation///0005227 // calcium activated cation channel activity // inferred from electronic annotation///0005261 // cation channel activity // inferred from direct assay///0005262 // calcium channel activity // inferred from electronic annotation	chr9:73439391-74061820 (-) // 88.23 // q21.12
211440_x_at	CYP3A43	64816	0006805 // xenobiotic metabolic process // traceable author statement///0044281 // small molecule metabolic process // traceable author statement///0055114 // oxidation-reduction process // inferred from electronic annotation	0005783 // endoplasmic reticulum // inferred from electronic annotation///0005789 // endoplasmic reticulum membrane // traceable author statement///0016020 // membrane // inferred from electronic annotation///0016021 // integral component of membrane // inferred from electronic annotation///0031090 // organelle membrane // inferred from electronic annotation///0043231 // intracellular membrane-bo…	0004497 // monooxygenase activity // inferred from sequence or structural similarity///0005506 // iron ion binding // inferred from electronic annotation///0016491 // oxidoreductase activity // inferred from electronic annotation///0016705 // oxidoreductase activity, acting on paired donors, with incorporation or reduction of molecular oxygen // inferred from electronic annotation///0016712 // ox…	chr7:99425738-99463624 (+) // 99.85 // q22.1
211441_x_at	CYP3A43	64816	0006805 // xenobiotic metabolic process // traceable author statement///0044281 // small molecule metabolic process // traceable author statement///0055114 // oxidation-reduction process // inferred from electronic annotation	0005783 // endoplasmic reticulum // inferred from electronic annotation///0005789 // endoplasmic reticulum membrane // traceable author statement///0016020 // membrane // inferred from electronic annotation///0016021 // integral component of membrane // inferred from electronic annotation///0031090 // organelle membrane // inferred from electronic annotation///0043231 // intracellular membrane-bo…	0004497 // monooxygenase activity // inferred from sequence or structural similarity///0005506 // iron ion binding // inferred from electronic annotation///0016491 // oxidoreductase activity // inferred from electronic annotation///0016705 // oxidoreductase activity, acting on paired donors, with incorporation or reduction of molecular oxygen // inferred from electronic annotation///0016712 // ox…	chr7:99425738-99463624 (+) // 84.09 // q22.1
211442_x_at	CYP3A43	64816	0006805 // xenobiotic metabolic process // traceable author statement///0044281 // small molecule metabolic process // traceable author statement///0055114 // oxidation-reduction process // inferred from electronic annotation	0005783 // endoplasmic reticulum // inferred from electronic annotation///0005789 // endoplasmic reticulum membrane // traceable author statement///0016020 // membrane // inferred from electronic annotation///0016021 // integral component of membrane // inferred from electronic annotation///0031090 // organelle membrane // inferred from electronic annotation///0043231 // intracellular membrane-bo…	0004497 // monooxygenase activity // inferred from sequence or structural similarity///0005506 // iron ion binding // inferred from electronic annotation///0016491 // oxidoreductase activity // inferred from electronic annotation///0016705 // oxidoreductase activity, acting on paired donors, with incorporation or reduction of molecular oxygen // inferred from electronic annotation///0016712 // ox…	chr7:99425738-99463624 (+) // 92.59 // q22.1
211488_s_at	ITGB8	3696	0001573 // ganglioside metabolic process // inferred from electronic annotation///0007155 // cell adhesion // traceable author statement///0007160 // cell-matrix adhesion // inferred from mutant phenotype///0007229 // integrin-mediated signaling pathway // inferred from electronic annotation///0010628 // positive regulation of gene expression // inferred from mutant phenotype///0010629 // negativ…	0005886 // plasma membrane // traceable author statement///0008305 // integrin complex // traceable author statement///0009986 // cell surface // inferred from direct assay///0016020 // membrane // inferred from electronic annotation///0016021 // integral component of membrane // inferred from electronic annotation///0034686 // integrin alphav-beta8 complex // inferred from direct assay///0070062…	0004872 // receptor activity // inferred from electronic annotation///0005102 // receptor binding // inferred from electronic annotation///1990430 // extracellular matrix protein binding // inferred from direct assay	chr7:20370724-20438680 (+) // 97.54 // p21.1
211495_x_at	TNFSF12-TNFSF13///TNFSF13	8741///407977	0001525 // angiogenesis // inferred from electronic annotation///0001938 // positive regulation of endothelial cell proliferation // traceable author statement///0002376 // immune system process // inferred from electronic annotation///0002426 // immunoglobulin production in mucosal tissue // inferred from electronic annotation///0002636 // positive regulation of germinal center formation // infe…	0005576 // extracellular region // traceable author statement///0005615 // extracellular space // inferred from electronic annotation///0005654 // nucleoplasm // traceable author statement///0005737 // cytoplasm // inferred from direct assay///0005829 // cytosol // traceable author statement///0005886 // plasma membrane // inferred from electronic annotation///0005886 // plasma membrane // tracea…	0005102 // receptor binding // traceable author statement///0005125 // cytokine activity // inferred from electronic annotation///0005164 // tumor necrosis factor receptor binding // inferred from electronic annotation///0005515 // protein binding // inferred from physical interaction///0005515 // protein binding // inferred from electronic annotation	chr17:7462084-7464376 (+) // 99.21 // p13.1
211506_s_at	CXCL8	3576	0001525 // angiogenesis // traceable author statement///0002237 // response to molecule of bacterial origin // inferred from direct assay///0006928 // movement of cell or subcellular component // traceable author statement///0006935 // chemotaxis // traceable author statement///0006954 // inflammatory response // traceable author statement///0006955 // immune response // not recorded///0007050 //…	0005576 // extracellular region // traceable author statement///0005615 // extracellular space // inferred from electronic annotation///0005622 // intracellular // inferred from direct assay///0005622 // intracellular // traceable author statement	0005125 // cytokine activity // inferred from electronic annotation///0005153 // interleukin-8 receptor binding // inferred from physical interaction///0005515 // protein binding // inferred from physical interaction///0008009 // chemokine activity // traceable author statement	chr4:74606368-74607738 (+) // 76.92 // q13.3
211516_at	IL5RA	3568	0000165 // MAPK cascade // traceable author statement///0000186 // activation of MAPKK activity // traceable author statement///0007165 // signal transduction // traceable author statement///0007173 // epidermal growth factor receptor signaling pathway // traceable author statement///0007264 // small GTPase mediated signal transduction // traceable author statement///0007265 // Ras protein signal…	0005615 // extracellular space // traceable author statement///0005622 // intracellular // traceable author statement///0005886 // plasma membrane // traceable author statement///0005895 // interleukin-5 receptor complex // non-traceable author statement///0016020 // membrane // inferred from electronic annotation///0016021 // integral component of membrane // inferred from electronic annotation	0004896 // cytokine receptor activity // inferred from electronic annotation///0004914 // interleukin-5 receptor activity // traceable author statement///0005515 // protein binding // inferred from physical interaction	chr3:3133487-3151664 (-) // 78.49 // p26.2
211517_s_at	IL5RA	3568	0000165 // MAPK cascade // traceable author statement///0000186 // activation of MAPKK activity // traceable author statement///0002437 // inflammatory response to antigenic stimulus // inferred from electronic annotation///0007165 // signal transduction // traceable author statement///0007173 // epidermal growth factor receptor signaling pathway // traceable author statement///0007264 // small G…	0005615 // extracellular space // traceable author statement///0005622 // intracellular // traceable author statement///0005886 // plasma membrane // traceable author statement///0005895 // interleukin-5 receptor complex // non-traceable author statement///0016020 // membrane // inferred from electronic annotation///0016021 // integral component of membrane // inferred from electronic annotation	0004896 // cytokine receptor activity // inferred from electronic annotation///0004914 // interleukin-5 receptor activity // traceable author statement///0005515 // protein binding // inferred from physical interaction	chr3:3133487-3151664 (-) // 78.49 // p26.2
211525_s_at	GP5	2814	0007155 // cell adhesion // non-traceable author statement///0007160 // cell-matrix adhesion // inferred from electronic annotation///0007409 // axonogenesis // not recorded///0007596 // blood coagulation // traceable author statement///0007597 // blood coagulation, intrinsic pathway // traceable author statement///0007599 // hemostasis // inferred from electronic annotation///0010544 // negative…	0005886 // plasma membrane // traceable author statement///0005887 // integral component of plasma membrane // traceable author statement///0016020 // membrane // inferred from electronic annotation///0016021 // integral component of membrane // inferred from electronic annotation///0070062 // extracellular exosome // inferred from direct assay	0005515 // protein binding // inferred from physical interaction///0005518 // collagen binding // inferred from electronic annotation	chr3:194115549-194119083 (-) // 78.52 // q29
211561_x_at	MAPK14	1432	0000077 // DNA damage checkpoint // inferred from electronic annotation///0000165 // MAPK cascade // inferred from electronic annotation///0000187 // activation of MAPK activity // traceable author statement///0000902 // cell morphogenesis // inferred from electronic annotation///0001502 // cartilage condensation // inferred from electronic annotation///0001525 // angiogenesis // inferred from el…	0000922 // spindle pole // inferred from electronic annotation///0005622 // intracellular // inferred from electronic annotation///0005623 // cell // inferred from electronic annotation///0005634 // nucleus // inferred from sequence or structural similarity///0005654 // nucleoplasm // inferred from direct assay///0005654 // nucleoplasm // traceable author statement///0005737 // cytoplasm // infer…	0000166 // nucleotide binding // inferred from electronic annotation///0004672 // protein kinase activity // inferred from electronic annotation///0004674 // protein serine/threonine kinase activity // traceable author statement///0004707 // MAP kinase activity // inferred from direct assay///0004708 // MAP kinase kinase activity // traceable author statement///0005515 // protein binding // infer…	chr6:35995916-36076386 (+) // 79.34 // p21.31
211568_at	ADGRB3	577	0007165 // signal transduction // inferred from electronic annotation///0007166 // cell surface receptor signaling pathway // inferred from electronic annotation///0007186 // G-protein coupled receptor signaling pathway // inferred from electronic annotation///0007520 // myoblast fusion // inferred from direct assay///0016525 // negative regulation of angiogenesis // inferred from electronic anno…	0005886 // plasma membrane // inferred from physical interaction///0016020 // membrane // inferred from electronic annotation///0016021 // integral component of membrane // inferred from electronic annotation	0004871 // signal transducer activity // inferred from electronic annotation///0004888 // transmembrane signaling receptor activity // inferred from electronic annotation///0004930 // G-protein coupled receptor activity // inferred from electronic annotation///0005096 // GTPase activator activity // inferred from sequence or structural similarity///0005515 // protein binding // inferred from phys…	chr6:69345350-70037038 (+) // 82.47 // q12
211581_x_at	LST1	7940	0000902 // cell morphogenesis // inferred from electronic annotation///0002376 // immune system process // inferred from electronic annotation///0006955 // immune response // non-traceable author statement///0008360 // regulation of cell shape // inferred from electronic annotation///0009653 // anatomical structure morphogenesis // non-traceable author statement///0016358 // dendrite development …	0000139 // Golgi membrane // inferred from electronic annotation///0005737 // cytoplasm // inferred from direct assay///0005794 // Golgi apparatus // non-traceable author statement///0012505 // endomembrane system // inferred from electronic annotation///0016020 // membrane // inferred from electronic annotation///0016021 // integral component of membrane // inferred from direct assay		chr6:31554624-31556587 (+) // 80.95 // p21.33
211582_x_at	LST1	7940	0000902 // cell morphogenesis // inferred from electronic annotation///0002376 // immune system process // inferred from electronic annotation///0006955 // immune response // non-traceable author statement///0008360 // regulation of cell shape // inferred from electronic annotation///0009653 // anatomical structure morphogenesis // non-traceable author statement///0016358 // dendrite development …	0000139 // Golgi membrane // inferred from electronic annotation///0005737 // cytoplasm // inferred from direct assay///0005794 // Golgi apparatus // non-traceable author statement///0012505 // endomembrane system // inferred from electronic annotation///0016020 // membrane // inferred from electronic annotation///0016021 // integral component of membrane // inferred from direct assay		chr6:31554475-31556587 (+) // 85.2 // p21.33
211612_s_at	IL13RA1	3597	0002639 // positive regulation of immunoglobulin production // inferred from electronic annotation///0007166 // cell surface receptor signaling pathway // traceable author statement///0019221 // cytokine-mediated signaling pathway // inferred from electronic annotation///0030890 // positive regulation of B cell proliferation // inferred from electronic annotation///0035772 // interleukin-13-media…	0005886 // plasma membrane // traceable author statement///0005898 // interleukin-13 receptor complex // traceable author statement///0016020 // membrane // inferred from electronic annotation///0016021 // integral component of membrane // inferred from electronic annotation	0004896 // cytokine receptor activity // inferred from electronic annotation///0005515 // protein binding // inferred from physical interaction///0016515 // interleukin-13 receptor activity // inferred from electronic annotation	chrX:117861570-117925971 (+) // 91.6 // q24
211613_s_at	GPD2	2820	0006072 // glycerol-3-phosphate metabolic process // inferred from electronic annotation///0006094 // gluconeogenesis // inferred from electronic annotation///0019563 // glycerol catabolic process // inferred from electronic annotation///0035264 // multicellular organism growth // inferred from electronic annotation///0043010 // camera-type eye development // inferred from electronic annotation//…	0005739 // mitochondrion // inferred from electronic annotation///0005743 // mitochondrial inner membrane // traceable author statement///0009331 // glycerol-3-phosphate dehydrogenase complex // inferred from electronic annotation	0004368 // glycerol-3-phosphate dehydrogenase activity // traceable author statement///0005509 // calcium ion binding // inferred from electronic annotation///0016491 // oxidoreductase activity // inferred from electronic annotation///0046872 // metal ion binding // inferred from electronic annotation///0052590 // sn-glycerol-3-phosphate:ubiquinone oxidoreductase activity // inferred from electro…	chr2:157291952-157425395 (+) // 99.25 // q24.1
211621_at	AR	367	0006351 // transcription, DNA-templated // inferred from direct assay///0006355 // regulation of transcription, DNA-templated // inferred from electronic annotation///0006367 // transcription initiation from RNA polymerase II promoter // traceable author statement///0006810 // transport // traceable author statement///0007165 // signal transduction // traceable author statement///0007264 // small…	0000790 // nuclear chromatin // inferred from direct assay///0005634 // nucleus // inferred from direct assay///0005654 // nucleoplasm // traceable author statement///0005737 // cytoplasm // inferred from direct assay///0005829 // cytosol // traceable author statement///0016020 // membrane // inferred from electronic annotation///0016021 // integral component of membrane // inferred from electron…	0000978 // RNA polymerase II core promoter proximal region sequence-specific DNA binding // inferred from direct assay///0001077 // transcriptional activator activity, RNA polymerase II core promoter proximal region sequence-specific binding // inferred from direct assay///0001085 // RNA polymerase II transcription factor binding // inferred from physical interaction///0003677 // DNA binding // n…	chrX:66764940-66944058 (+) // 93.3 // q12
211631_x_at	B4GALT1	2683	0002064 // epithelial cell development // inferred from electronic annotation///0002526 // acute inflammatory response // inferred from electronic annotation///0005975 // carbohydrate metabolic process // traceable author statement///0005989 // lactose biosynthetic process // traceable author statement///0006012 // galactose metabolic process // inferred from electronic annotation///0006486 // pr…	0000138 // Golgi trans cisterna // inferred from direct assay///0000139 // Golgi membrane // traceable author statement///0005576 // extracellular region // inferred from electronic annotation///0005615 // extracellular space // inferred from direct assay///0005794 // Golgi apparatus // inferred from direct assay///0005886 // plasma membrane // traceable author statement///0009897 // external sid…	0003831 // beta-N-acetylglucosaminylglycopeptide beta-1,4-galactosyltransferase activity // inferred from direct assay///0003945 // N-acetyllactosamine synthase activity // inferred from direct assay///0004461 // lactose synthase activity // not recorded///0004461 // lactose synthase activity // inferred from direct assay///0005515 // protein binding // inferred from electronic annotation///00080…	chr9:33113255-33167234 (-) // 97.55 // p21.1
211676_s_at	IFNGR1	3459	0007165 // signal transduction // traceable author statement///0009615 // response to virus // traceable author statement///0019221 // cytokine-mediated signaling pathway // not recorded///0019221 // cytokine-mediated signaling pathway // traceable author statement///0060333 // interferon-gamma-mediated signaling pathway // traceable author statement///0060334 // regulation of interferon-gamma-me…	0005783 // endoplasmic reticulum // inferred from electronic annotation///0005886 // plasma membrane // not recorded///0005886 // plasma membrane // traceable author statement///0005887 // integral component of plasma membrane // traceable author statement///0014069 // postsynaptic density // inferred from electronic annotation///0016020 // membrane // inferred from electronic annotation///001602…	0004906 // interferon-gamma receptor activity // traceable author statement///0005515 // protein binding // inferred from physical interaction///0019955 // cytokine binding // inferred from electronic annotation	chr6:137519017-137540485 (-) // 99.82 // q23.3
211677_x_at	CADM3	57863	0007155 // cell adhesion // inferred from electronic annotation///0007156 // homophilic cell adhesion via plasma membrane adhesion molecules // not recorded///0007156 // homophilic cell adhesion via plasma membrane adhesion molecules // inferred from sequence or structural similarity///0007157 // heterophilic cell-cell adhesion via plasma membrane cell adhesion molecules // not recorded///0007157…	0005886 // plasma membrane // traceable author statement///0005887 // integral component of plasma membrane // not recorded///0005911 // cell-cell junction // inferred from sequence or structural similarity///0005913 // cell-cell adherens junction // not recorded///0016020 // membrane // inferred from electronic annotation///0016021 // integral component of membrane // inferred from electronic an…	0004872 // receptor activity // not recorded///0005102 // receptor binding // not recorded///0005515 // protein binding // inferred from electronic annotation///0042803 // protein homodimerization activity // not recorded///0042803 // protein homodimerization activity // inferred from sequence or structural similarity///0050839 // cell adhesion molecule binding // not recorded	chr1:159141419-159171801 (+) // 99.21 // q23.2
211719_x_at	FN1	2335	0001525 // angiogenesis // inferred from electronic annotation///0001932 // regulation of protein phosphorylation // inferred from direct assay///0002576 // platelet degranulation // traceable author statement///0006953 // acute-phase response // inferred from electronic annotation///0007044 // cell-substrate junction assembly // inferred from electronic annotation///0007155 // cell adhesion // n…	0005576 // extracellular region // non-traceable author statement///0005576 // extracellular region // traceable author statement///0005577 // fibrinogen complex // inferred from direct assay///0005578 // proteinaceous extracellular matrix // inferred from electronic annotation///0005604 // basement membrane // inferred from electronic annotation///0005605 // basal lamina // inferred from electro…	0002020 // protease binding // inferred from physical interaction///0005178 // integrin binding // inferred from direct assay///0005178 // integrin binding // inferred from mutant phenotype///0005178 // integrin binding // inferred from physical interaction///0005515 // protein binding // inferred from physical interaction///0005518 // collagen binding // non-traceable author statement///0008201 …	chr2:216225586-216235072 (-) // 94.05 // q35
211768_at	LAT2	7462	0002250 // adaptive immune response // inferred from electronic annotation///0002376 // immune system process // inferred from electronic annotation///0002764 // immune response-regulating signaling pathway // inferred from electronic annotation///0019722 // calcium-mediated signaling // inferred from genetic interaction///0035556 // intracellular signal transduction // inferred from genetic inte…	0005622 // intracellular // inferred from genetic interaction///0005886 // plasma membrane // traceable author statement///0016020 // membrane // inferred from electronic annotation///0016021 // integral component of membrane // inferred from electronic annotation///0042629 // mast cell granule // inferred from electronic annotation///0045121 // membrane raft // inferred from direct assay///00700…	0005515 // protein binding // inferred from physical interaction///0042169 // SH2 domain binding // inferred from mutant phenotype///0042169 // SH2 domain binding // inferred from physical interaction	chr7:73624310-73640704 (+) // 58.5 // q11.23
211810_s_at	GALC	2581	0005975 // carbohydrate metabolic process // inferred from electronic annotation///0006629 // lipid metabolic process // inferred from electronic annotation///0006665 // sphingolipid metabolic process // traceable author statement///0006683 // galactosylceramide catabolic process // inferred from sequence or structural similarity///0006687 // glycosphingolipid metabolic process // traceable autho…	0005739 // mitochondrion // inferred from electronic annotation///0005764 // lysosome // traceable author statement///0043202 // lysosomal lumen // traceable author statement///0070062 // extracellular exosome // inferred from direct assay	0004336 // galactosylceramidase activity // inferred from sequence or structural similarity///0016787 // hydrolase activity // inferred from electronic annotation///0016798 // hydrolase activity, acting on glycosyl bonds // inferred from electronic annotation	chr14:88429659-88459498 (-) // 98.77 // q31.3
211823_s_at	PXN	5829	0000187 // activation of MAPK activity // inferred from electronic annotation///0006936 // muscle contraction // traceable author statement///0007010 // cytoskeleton organization // inferred from electronic annotation///0007155 // cell adhesion // non-traceable author statement///0007160 // cell-matrix adhesion // inferred from electronic annotation///0007165 // signal transduction // traceable a…	0001725 // stress fiber // inferred from direct assay///0005654 // nucleoplasm // inferred from direct assay///0005737 // cytoplasm // inferred from direct assay///0005829 // cytosol // traceable author statement///0005856 // cytoskeleton // inferred from electronic annotation///0005875 // microtubule associated complex // traceable author statement///0005886 // plasma membrane // inferred from d…	0005178 // integrin binding // inferred from electronic annotation///0005515 // protein binding // inferred from physical interaction///0008013 // beta-catenin binding // inferred from physical interaction///0008270 // zinc ion binding // inferred from electronic annotation///0017166 // vinculin binding // inferred from physical interaction///0019901 // protein kinase binding // inferred from ele…	chr12:120650116-120662181 (-) // 99.21 // q24.23
211837_s_at	PTCRA	171558		0016020 // membrane // inferred from electronic annotation///0016021 // integral component of membrane // inferred from electronic annotation	0005515 // protein binding // inferred from physical interaction	chr6:42883807-42893420 (+) // 94.94 // p21.1
211839_s_at	CSF1	1435	0001503 // ossification // inferred from electronic annotation///0001954 // positive regulation of cell-matrix adhesion // inferred from sequence or structural similarity///0002158 // osteoclast proliferation // inferred from electronic annotation///0002376 // immune system process // inferred from electronic annotation///0003006 // developmental process involved in reproduction // inferred from …	0005576 // extracellular region // inferred from electronic annotation///0005615 // extracellular space // inferred from direct assay///0005886 // plasma membrane // inferred from electronic annotation///0016020 // membrane // non-traceable author statement///0016021 // integral component of membrane // inferred from electronic annotation///0043235 // receptor complex // inferred from electronic …	0005125 // cytokine activity // inferred from direct assay///0005157 // macrophage colony-stimulating factor receptor binding // inferred from sequence or structural similarity///0005157 // macrophage colony-stimulating factor receptor binding // traceable author statement///0005515 // protein binding // inferred from physical interaction///0008083 // growth factor activity // inferred from direc…	chr1:110453607-110467820 (+) // 97.66 // p13.3
211849_s_at	RNGTT	8732	0006366 // transcription from RNA polymerase II promoter // traceable author statement///0006370 // 7-methylguanosine mRNA capping // inferred from direct assay///0006370 // 7-methylguanosine mRNA capping // traceable author statement///0006396 // RNA processing // inferred from direct assay///0006397 // mRNA processing // inferred from electronic annotation///0006470 // protein dephosphorylation…	0005634 // nucleus // traceable author statement///0005654 // nucleoplasm // traceable author statement	0000166 // nucleotide binding // inferred from electronic annotation///0003824 // catalytic activity // inferred from electronic annotation///0004484 // mRNA guanylyltransferase activity // inferred from direct assay///0004651 // polynucleotide 5'-phosphatase activity // traceable author statement///0004725 // protein tyrosine phosphatase activity // inferred from electronic annotation///0005525 …	chr6:89322437-89673128 (-) // 100.0 // q15
211862_x_at	CFLAR	8837	0006508 // proteolysis // inferred from electronic annotation///0006915 // apoptotic process // inferred from mutant phenotype///0006915 // apoptotic process // traceable author statement///0006919 // activation of cysteine-type endopeptidase activity involved in apoptotic process // not recorded///0007519 // skeletal muscle tissue development // inferred from sequence or structural similarity///…	0005737 // cytoplasm // inferred from direct assay///0005829 // cytosol // traceable author statement///0031264 // death-inducing signaling complex // inferred from direct assay///0031265 // CD95 death-inducing signaling complex // inferred from electronic annotation///0045121 // membrane raft // inferred from electronic annotation///0097342 // ripoptosome // inferred from direct assay	0002020 // protease binding // inferred from physical interaction///0004197 // cysteine-type endopeptidase activity // inferred from electronic annotation///0005123 // death receptor binding // inferred from electronic annotation///0005515 // protein binding // inferred from physical interaction///0008047 // enzyme activator activity // inferred from direct assay///0008234 // cysteine-type peptid…	chr2:201994588-202025666 (+) // 93.88 // q33.1
211887_x_at	MSR1	4481	0006897 // endocytosis // inferred from electronic annotation///0006898 // receptor-mediated endocytosis // traceable author statement///0010744 // positive regulation of macrophage derived foam cell differentiation // inferred from sequence or structural similarity///0010886 // positive regulation of cholesterol storage // inferred from sequence or structural similarity///0030301 // cholesterol …	0005581 // collagen trimer // inferred from electronic annotation///0005829 // cytosol // inferred from electronic annotation///0005886 // plasma membrane // traceable author statement///0005887 // integral component of plasma membrane // traceable author statement///0016020 // membrane // inferred from electronic annotation///0016021 // integral component of membrane // inferred from electronic …	0005044 // scavenger receptor activity // inferred from electronic annotation///0005515 // protein binding // inferred from physical interaction///0030169 // low-density lipoprotein particle binding // inferred from sequence or structural similarity	chr8:15967593-16035497 (-) // 100.0 // p22
211892_s_at	PTGIS	5740	0001516 // prostaglandin biosynthetic process // inferred from direct assay///0006629 // lipid metabolic process // inferred from electronic annotation///0006631 // fatty acid metabolic process // inferred from electronic annotation///0006633 // fatty acid biosynthetic process // inferred from electronic annotation///0006690 // icosanoid metabolic process // traceable author statement///0006693 /…	0005615 // extracellular space // inferred from sequence or structural similarity///0005634 // nucleus // inferred from direct assay///0005737 // cytoplasm // inferred from electronic annotation///0005783 // endoplasmic reticulum // inferred from direct assay///0005789 // endoplasmic reticulum membrane // traceable author statement///0005901 // caveola // inferred from direct assay///0016020 // m…	0004497 // monooxygenase activity // inferred from electronic annotation///0005506 // iron ion binding // inferred from electronic annotation///0005515 // protein binding // inferred from physical interaction///0008116 // prostaglandin-I synthase activity // inferred from direct assay///0016705 // oxidoreductase activity, acting on paired donors, with incorporation or reduction of molecular oxyge…	chr20:48124456-48184653 (-) // 99.93 // q13.13
211962_s_at	ZFP36L1	677	0000288 // nuclear-transcribed mRNA catabolic process, deadenylation-dependent decay // inferred from electronic annotation///0001570 // vasculogenesis // inferred from electronic annotation///0003342 // proepicardium development // inferred from electronic annotation///0006355 // regulation of transcription, DNA-templated // non-traceable author statement///0006402 // mRNA catabolic process // i…	0005634 // nucleus // inferred from electronic annotation///0005737 // cytoplasm // inferred from electronic annotation///0005829 // cytosol // traceable author statement	0003677 // DNA binding // inferred from electronic annotation///0003700 // transcription factor activity, sequence-specific DNA binding // non-traceable author statement///0003729 // mRNA binding // inferred from direct assay///0005515 // protein binding // inferred from physical interaction///0017091 // AU-rich element binding // inferred from electronic annotation///0044822 // poly(A) RNA bindi…	chr14:69254055-69258198 (-) // 96.24 // q24.1
[truncated: 255 more rows]
