# Supplementary material for: Histaminergic System and Inflammation-Related Genes in Normal Large Intestine and Adenocarcinoma Tissues: Transcriptional Profiles and Relations
Source: Int J Mol Sci. 2023 Mar 3;24(5):4913. doi: 10.3390/ijms24054913 (PMC10002554; doi:10.3390/ijms24054913)
Supplement: Supplementary file 1 [file ijms-24-04913-s001.zip › Table S3. A.xlsx]

## Sheet: Table S3. A
Probe Set ID	p	Regulation	FC (abs)	FC	Log FC	Gene Symbol	Entrez Gene	Gene Ontology Biological Process	Gene Ontology Cellular Component	Gene Ontology Molecular Function	Alignments
203332_s_at	1.6314492E-5	up	1.8984488	1.8984488	0.9248211	INPP5D	3635	0002376 // immune system process // inferred from electronic annotation///0006470 // protein dephosphorylation // inferred from electronic annotation///0006644 // phospholipid metabolic process // traceable author statement///0006661 // phosphatidylinositol biosynthetic process // traceable author statement///0006796 // phosphate-containing compound metabolic process // traceable author statement…	0005737 // cytoplasm // inferred from electronic annotation///0005829 // cytosol // traceable author statement///0016020 // membrane // inferred from electronic annotation	0004445 // inositol-polyphosphate 5-phosphatase activity // inferred from electronic annotation///0005515 // protein binding // inferred from physical interaction///0016787 // hydrolase activity // inferred from electronic annotation///0017124 // SH3 domain binding // inferred from electronic annotation///0034594 // phosphatidylinositol trisphosphate phosphatase activity // inferred from electron…	chr2:233925070-234116549 (+) // 95.94 // q37.1
202626_s_at	0.0019182505	up	1.6301215	1.6301215	0.7049795	LYN	4067	0001782 // B cell homeostasis // inferred from sequence or structural similarity///0001817 // regulation of cytokine production // inferred from sequence or structural similarity///0001932 // regulation of protein phosphorylation // traceable author statement///0001933 // negative regulation of protein phosphorylation // inferred from sequence or structural similarity///0002223 // stimulatory C-t…	0005634 // nucleus // inferred from direct assay///0005634 // nucleus // inferred from sequence or structural similarity///0005737 // cytoplasm // inferred from sequence or structural similarity///0005758 // mitochondrial intermembrane space // inferred from electronic annotation///0005794 // Golgi apparatus // inferred from direct assay///0005829 // cytosol // traceable author statement///000588…	0000166 // nucleotide binding // inferred from electronic annotation///0004672 // protein kinase activity // inferred from electronic annotation///0004713 // protein tyrosine kinase activity // not recorded///0004713 // protein tyrosine kinase activity // inferred from direct assay///0004713 // protein tyrosine kinase activity // traceable author statement///0004715 // non-membrane spanning prote…	chr8:56792371-56923131 (+) // 98.3 // q12.1
210754_s_at	0.015651686	up	1.4635913	1.4635913	0.5495128	LYN	4067	0001782 // B cell homeostasis // inferred from sequence or structural similarity///0001817 // regulation of cytokine production // inferred from sequence or structural similarity///0001932 // regulation of protein phosphorylation // traceable author statement///0001933 // negative regulation of protein phosphorylation // inferred from sequence or structural similarity///0002223 // stimulatory C-t…	0005634 // nucleus // inferred from direct assay///0005634 // nucleus // inferred from sequence or structural similarity///0005737 // cytoplasm // inferred from sequence or structural similarity///0005758 // mitochondrial intermembrane space // inferred from electronic annotation///0005794 // Golgi apparatus // inferred from direct assay///0005829 // cytosol // traceable author statement///000588…	0000166 // nucleotide binding // inferred from electronic annotation///0004672 // protein kinase activity // inferred from electronic annotation///0004713 // protein tyrosine kinase activity // not recorded///0004713 // protein tyrosine kinase activity // inferred from direct assay///0004713 // protein tyrosine kinase activity // traceable author statement///0004715 // non-membrane spanning prote…	chr8:56854412-56922687 (+) // 98.75 // q12.1
202625_at	7.606306E-4	up	1.4586221	1.4586221	0.54460615	LYN	4067	0001782 // B cell homeostasis // inferred from sequence or structural similarity///0001817 // regulation of cytokine production // inferred from sequence or structural similarity///0001932 // regulation of protein phosphorylation // traceable author statement///0001933 // negative regulation of protein phosphorylation // inferred from sequence or structural similarity///0002223 // stimulatory C-t…	0005634 // nucleus // inferred from direct assay///0005634 // nucleus // inferred from sequence or structural similarity///0005737 // cytoplasm // inferred from sequence or structural similarity///0005758 // mitochondrial intermembrane space // inferred from electronic annotation///0005794 // Golgi apparatus // inferred from direct assay///0005829 // cytosol // traceable author statement///000588…	0000166 // nucleotide binding // inferred from electronic annotation///0004672 // protein kinase activity // inferred from electronic annotation///0004713 // protein tyrosine kinase activity // not recorded///0004713 // protein tyrosine kinase activity // inferred from direct assay///0004713 // protein tyrosine kinase activity // traceable author statement///0004715 // non-membrane spanning prote…	chr8:56791985-56924592 (+) // 97.41 // q12.1
205349_at	0.0013869074	up	1.4336762	1.4336762	0.51971924	GNA15	2769	0007165 // signal transduction // inferred from electronic annotation///0007186 // G-protein coupled receptor signaling pathway // inferred from electronic annotation///0007188 // adenylate cyclase-modulating G-protein coupled receptor signaling pathway // not recorded///0007200 // phospholipase C-activating G-protein coupled receptor signaling pathway // inferred from electronic annotation///000…	0005829 // cytosol // inferred from genetic interaction///0005834 // heterotrimeric G-protein complex // non-traceable author statement///0005886 // plasma membrane // traceable author statement	0000166 // nucleotide binding // inferred from electronic annotation///0001664 // G-protein coupled receptor binding // not recorded///0003924 // GTPase activity // not recorded///0004871 // signal transducer activity // inferred from genetic interaction///0005525 // GTP binding // inferred from electronic annotation///0019001 // guanyl nucleotide binding // inferred from electronic annotation///…	chr19:3136229-3163741 (+) // 99.9 // p13.3
205581_s_at	0.019914242	up	1.2745727	1.2745727	0.3500137	NOS3	4846	0001525 // angiogenesis // inferred from electronic annotation///0001542 // ovulation from ovarian follicle // inferred from electronic annotation///0001701 // in utero embryonic development // inferred from electronic annotation///0001974 // blood vessel remodeling // inferred from sequence or structural similarity///0002028 // regulation of sodium ion transport // inferred from electronic annot…	0000139 // Golgi membrane // traceable author statement///0005634 // nucleus // inferred from sequence or structural similarity///0005737 // cytoplasm // inferred from direct assay///0005794 // Golgi apparatus // inferred from electronic annotation///0005829 // cytosol // not recorded///0005829 // cytosol // traceable author statement///0005856 // cytoskeleton // inferred from electronic annotati…	0003785 // actin monomer binding // inferred from physical interaction///0003958 // NADPH-hemoprotein reductase activity // not recorded///0004517 // nitric-oxide synthase activity // inferred from direct assay///0004517 // nitric-oxide synthase activity // inferred from mutant phenotype///0005506 // iron ion binding // inferred from electronic annotation///0005515 // protein binding // inferred …	chr7:150690871-150711315 (+) // 99.11 // q36.1
219540_at	0.008469894	up	1.2710085	1.2710085	0.34597367	ZNF267	10308	0006351 // transcription, DNA-templated // inferred from electronic annotation///0006355 // regulation of transcription, DNA-templated // not recorded///0007275 // multicellular organismal development // traceable author statement	0005622 // intracellular // inferred from electronic annotation///0005634 // nucleus // inferred from electronic annotation	0003676 // nucleic acid binding // inferred from electronic annotation///0003677 // DNA binding // inferred from electronic annotation///0003700 // transcription factor activity, sequence-specific DNA binding // not recorded///0046872 // metal ion binding // inferred from electronic annotation	chr16:31885118-31928676 (+) // 99.6 // p11.2
203331_s_at	0.019414887	up	1.2304167	1.2304167	0.29914692	INPP5D	3635	0002376 // immune system process // inferred from electronic annotation///0006470 // protein dephosphorylation // inferred from electronic annotation///0006644 // phospholipid metabolic process // traceable author statement///0006661 // phosphatidylinositol biosynthetic process // traceable author statement///0006796 // phosphate-containing compound metabolic process // traceable author statement…	0005737 // cytoplasm // inferred from electronic annotation///0005829 // cytosol // traceable author statement///0016020 // membrane // inferred from electronic annotation	0004445 // inositol-polyphosphate 5-phosphatase activity // inferred from electronic annotation///0005515 // protein binding // inferred from physical interaction///0016787 // hydrolase activity // inferred from electronic annotation///0017124 // SH3 domain binding // inferred from electronic annotation///0034594 // phosphatidylinositol trisphosphate phosphatase activity // inferred from electron…	chr2:233925066-234115616 (+) // 97.57 // q37.1
211624_s_at	0.011193426	up	1.1576818	1.1576818	0.2112388	DRD2	1813	0001659 // temperature homeostasis // inferred from sequence or structural similarity///0001666 // response to hypoxia // inferred from electronic annotation///0001963 // synaptic transmission, dopaminergic // not recorded///0001964 // startle response // inferred from electronic annotation///0001975 // response to amphetamine // inferred from sequence or structural similarity///0001976 // neurol…	0001669 // acrosomal vesicle // inferred from electronic annotation///0005622 // intracellular // inferred from direct assay///0005829 // cytosol // not recorded///0005829 // cytosol // inferred from direct assay///0005829 // cytosol // inferred from electronic annotation///0005886 // plasma membrane // traceable author statement///0005887 // integral component of plasma membrane // inferred by c…	0001591 // dopamine neurotransmitter receptor activity, coupled via Gi/Go // inferred from direct assay///0004871 // signal transducer activity // inferred from electronic annotation///0004930 // G-protein coupled receptor activity // inferred from electronic annotation///0004935 // adrenergic receptor activity // not recorded///0004952 // dopamine neurotransmitter receptor activity // inferred f…	chr11:113281360-113346111 (-) // 93.79 // q23.2
205421_at	0.02624353	up	1.1561494	1.1561494	0.20932782	SLC22A3	6581	0006810 // transport // inferred from electronic annotation///0006811 // ion transport // inferred from electronic annotation///0006855 // drug transmembrane transport // traceable author statement///0015695 // organic cation transport // inferred from direct assay///0015697 // quaternary ammonium group transport // inferred from direct assay///0015844 // monoamine transport // inferred from elec…	0005886 // plasma membrane // traceable author statement///0005887 // integral component of plasma membrane // traceable author statement///0016020 // membrane // traceable author statement///0016021 // integral component of membrane // inferred from electronic annotation	0005215 // transporter activity // inferred from electronic annotation///0005329 // dopamine transmembrane transporter activity // not recorded///0005515 // protein binding // inferred from physical interaction///0015075 // ion transmembrane transporter activity // inferred from electronic annotation///0015101 // organic cation transmembrane transporter activity // inferred from direct assay///00…	chr6:160769424-160873603 (+) // 99.0 // q25.3
206590_x_at	0.022359857	up	1.1538641	1.1538641	0.20647337	DRD2	1813	0001659 // temperature homeostasis // inferred from sequence or structural similarity///0001666 // response to hypoxia // inferred from electronic annotation///0001963 // synaptic transmission, dopaminergic // not recorded///0001964 // startle response // inferred from electronic annotation///0001975 // response to amphetamine // inferred from sequence or structural similarity///0001976 // neurol…	0001669 // acrosomal vesicle // inferred from electronic annotation///0005622 // intracellular // inferred from direct assay///0005829 // cytosol // not recorded///0005829 // cytosol // inferred from direct assay///0005829 // cytosol // inferred from electronic annotation///0005886 // plasma membrane // traceable author statement///0005887 // integral component of plasma membrane // inferred by c…	0001591 // dopamine neurotransmitter receptor activity, coupled via Gi/Go // inferred from direct assay///0004871 // signal transducer activity // inferred from electronic annotation///0004930 // G-protein coupled receptor activity // inferred from electronic annotation///0004935 // adrenergic receptor activity // not recorded///0004952 // dopamine neurotransmitter receptor activity // inferred f…	chr11:113280331-113295406 (-) // 99.76 // q23.2
208351_s_at	0.037522987	down	1.1934482	-1.1934482	-0.25513592	MAPK1	5594	0000165 // MAPK cascade // traceable author statement///0000186 // activation of MAPKK activity // traceable author statement///0000187 // activation of MAPK activity // traceable author statement///0000189 // MAPK import into nucleus // inferred from electronic annotation///0002224 // toll-like receptor signaling pathway // traceable author statement///0002755 // MyD88-dependent toll-like recept…	0005622 // intracellular // inferred from electronic annotation///0005634 // nucleus // inferred from direct assay///0005634 // nucleus // traceable author statement///0005654 // nucleoplasm // inferred from direct assay///0005654 // nucleoplasm // traceable author statement///0005737 // cytoplasm // inferred from direct assay///0005737 // cytoplasm // inferred from sequence or structural similar…	0000166 // nucleotide binding // inferred from electronic annotation///0001784 // phosphotyrosine binding // inferred from electronic annotation///0003677 // DNA binding // inferred from electronic annotation///0004672 // protein kinase activity // inferred from electronic annotation///0004674 // protein serine/threonine kinase activity // inferred from direct assay///0004707 // MAP kinase activi…	chr22:22118344-22221929 (-) // 87.71 // q11.21
208316_s_at	0.009576572	down	1.2217722	-1.2217722	-0.2889753	OCRL	4952	0001701 // in utero embryonic development // inferred from electronic annotation///0006470 // protein dephosphorylation // inferred from electronic annotation///0006629 // lipid metabolic process // non-traceable author statement///0006644 // phospholipid metabolic process // traceable author statement///0006661 // phosphatidylinositol biosynthetic process // traceable author statement///0007165 …	0001750 // photoreceptor outer segment // inferred from direct assay///0005634 // nucleus // inferred from direct assay///0005737 // cytoplasm // inferred from direct assay///0005768 // endosome // inferred from electronic annotation///0005769 // early endosome // inferred from direct assay///0005794 // Golgi apparatus // inferred from electronic annotation///0005795 // Golgi stack // traceable a…	0004439 // phosphatidylinositol-4,5-bisphosphate 5-phosphatase activity // inferred from electronic annotation///0005096 // GTPase activator activity // inferred from direct assay///0005515 // protein binding // inferred from physical interaction///0016787 // hydrolase activity // inferred from electronic annotation///0048365 // Rac GTPase binding // inferred from physical interaction///0052745 /…	chrX:128674251-128725678 (+) // 96.94 // q25
219206_x_at	0.030946674	down	1.2628266	-1.2628266	-0.3366565	TMBIM4	51643	0006915 // apoptotic process // inferred from electronic annotation///0043066 // negative regulation of apoptotic process // inferred from mutant phenotype///0050848 // regulation of calcium-mediated signaling // inferred from direct assay	0000139 // Golgi membrane // inferred from electronic annotation///0005794 // Golgi apparatus // inferred from electronic annotation///0005795 // Golgi stack // inferred from direct assay///0016020 // membrane // inferred from electronic annotation///0016021 // integral component of membrane // inferred from electronic annotation	0005515 // protein binding // inferred from physical interaction	chr12:66531191-66563764 (-) // 76.53 // q14.3
219314_s_at	0.010810344	down	1.2695209	-1.2695209	-0.34428412	ZNF219	51222	0000122 // negative regulation of transcription from RNA polymerase II promoter // inferred from direct assay///0001505 // regulation of neurotransmitter levels // inferred from electronic annotation///0006351 // transcription, DNA-templated // inferred from direct assay///0006355 // regulation of transcription, DNA-templated // inferred from mutant phenotype///0007165 // signal transduction // n…	0005634 // nucleus // inferred from direct assay///0016021 // integral component of membrane // inferred from electronic annotation	0000978 // RNA polymerase II core promoter proximal region sequence-specific DNA binding // inferred from direct assay///0001078 // transcriptional repressor activity, RNA polymerase II core promoter proximal region sequence-specific binding // inferred from direct assay///0003676 // nucleic acid binding // inferred from electronic annotation///0003677 // DNA binding // inferred from direct assay…	chr14:21558235-21566799 (-) // 89.57 // q11.2
34478_at	0.034968253	down	1.2883469	-1.2883469	-0.36552107	RAB11B	9230	0001881 // receptor recycling // inferred from sequence or structural similarity///0006810 // transport // inferred from electronic annotation///0006886 // intracellular protein transport // not recorded///0006913 // nucleocytoplasmic transport // inferred from electronic annotation///0007165 // signal transduction // inferred from electronic annotation///0007264 // small GTPase mediated signal t…	0005622 // intracellular // inferred from electronic annotation///0005737 // cytoplasm // inferred from electronic annotation///0005739 // mitochondrion // inferred from electronic annotation///0005768 // endosome // inferred from electronic annotation///0005815 // microtubule organizing center // inferred from direct assay///0005886 // plasma membrane // inferred from direct assay///0008021 // s…	0000166 // nucleotide binding // inferred from electronic annotation///0003924 // GTPase activity // inferred from direct assay///0005515 // protein binding // inferred from physical interaction///0005525 // GTP binding // inferred from direct assay///0019003 // GDP binding // inferred from direct assay///0031489 // myosin V binding // inferred from physical interaction	chr19:8454778-8468677 (+) // 76.53 // p13.2
204763_s_at	0.012287768	down	1.3074654	-1.3074654	-0.3867728	GNAO1	2775	0006936 // muscle contraction // traceable author statement///0007165 // signal transduction // inferred from electronic annotation///0007186 // G-protein coupled receptor signaling pathway // inferred from electronic annotation///0007188 // adenylate cyclase-modulating G-protein coupled receptor signaling pathway // not recorded///0007212 // dopamine receptor signaling pathway // not recorded///…	0005622 // intracellular // inferred from electronic annotation///0005834 // heterotrimeric G-protein complex // not recorded///0005886 // plasma membrane // traceable author statement///0016020 // membrane // inferred from electronic annotation///0030425 // dendrite // inferred from electronic annotation///0043005 // neuron projection // inferred from electronic annotation///0043209 // myelin sh…	0000166 // nucleotide binding // inferred from electronic annotation///0003924 // GTPase activity // not recorded///0004871 // signal transducer activity // not recorded///0005525 // GTP binding // inferred from electronic annotation///0019001 // guanyl nucleotide binding // inferred from electronic annotation///0031683 // G-protein beta/gamma-subunit complex binding // not recorded///0031821 // …	chr16:56226147-56391150 (+) // 97.34 // q12.2
210616_s_at	0.0030300552	down	1.3136295	-1.3136295	-0.39355844	SEC31A	22872	0002474 // antigen processing and presentation of peptide antigen via MHC class I // traceable author statement///0006810 // transport // inferred from electronic annotation///0006888 // ER to Golgi vesicle-mediated transport // non-traceable author statement///0006888 // ER to Golgi vesicle-mediated transport // traceable author statement///0015031 // protein transport // inferred from electroni…	0000139 // Golgi membrane // traceable author statement///0005737 // cytoplasm // inferred from direct assay///0005783 // endoplasmic reticulum // inferred from direct assay///0005789 // endoplasmic reticulum membrane // traceable author statement///0005829 // cytosol // traceable author statement///0012507 // ER to Golgi transport vesicle membrane // traceable author statement///0016020 // membr…	0005515 // protein binding // inferred from physical interaction///0048306 // calcium-dependent protein binding // inferred from physical interaction	chr4:83740174-83821691 (-) // 99.54 // q21.22
212271_at	0.0056925155	down	1.3655053	-1.3655053	-0.44943494	MAPK1	5594	0000165 // MAPK cascade // traceable author statement///0000186 // activation of MAPKK activity // traceable author statement///0000187 // activation of MAPK activity // traceable author statement///0000189 // MAPK import into nucleus // inferred from electronic annotation///0002224 // toll-like receptor signaling pathway // traceable author statement///0002755 // MyD88-dependent toll-like recept…	0005622 // intracellular // inferred from electronic annotation///0005634 // nucleus // inferred from direct assay///0005634 // nucleus // traceable author statement///0005654 // nucleoplasm // inferred from direct assay///0005654 // nucleoplasm // traceable author statement///0005737 // cytoplasm // inferred from direct assay///0005737 // cytoplasm // inferred from sequence or structural similar…	0000166 // nucleotide binding // inferred from electronic annotation///0001784 // phosphotyrosine binding // inferred from electronic annotation///0003677 // DNA binding // inferred from electronic annotation///0004672 // protein kinase activity // inferred from electronic annotation///0004674 // protein serine/threonine kinase activity // inferred from direct assay///0004707 // MAP kinase activi…	chr22:22116311-22221722 (-) // 96.48 // q11.21
209576_at	0.025944967	down	1.3887184	-1.3887184	-0.47375405	GNAI1	2770	0007049 // cell cycle // inferred from electronic annotation///0007165 // signal transduction // inferred from electronic annotation///0007186 // G-protein coupled receptor signaling pathway // inferred from sequence or structural similarity///0007188 // adenylate cyclase-modulating G-protein coupled receptor signaling pathway // not recorded///0007193 // adenylate cyclase-inhibiting G-protein co…	0005622 // intracellular // inferred from electronic annotation///0005634 // nucleus // inferred from electronic annotation///0005737 // cytoplasm // inferred from direct assay///0005765 // lysosomal membrane // inferred from direct assay///0005813 // centrosome // inferred from direct assay///0005815 // microtubule organizing center // inferred from electronic annotation///0005834 // heterotrime…	0000166 // nucleotide binding // inferred from electronic annotation///0003924 // GTPase activity // not recorded///0003924 // GTPase activity // traceable author statement///0004871 // signal transducer activity // not recorded///0005515 // protein binding // inferred from physical interaction///0005525 // GTP binding // inferred from sequence or structural similarity///0019001 // guanyl nucleot…	chr7:79764161-79847350 (+) // 98.92 // q21.11
204762_s_at	0.010289862	down	1.4431357	-1.4431357	-0.529207	GNAO1	2775	0006936 // muscle contraction // traceable author statement///0007165 // signal transduction // inferred from electronic annotation///0007186 // G-protein coupled receptor signaling pathway // inferred from electronic annotation///0007188 // adenylate cyclase-modulating G-protein coupled receptor signaling pathway // not recorded///0007212 // dopamine receptor signaling pathway // not recorded///…	0005622 // intracellular // inferred from electronic annotation///0005834 // heterotrimeric G-protein complex // not recorded///0005886 // plasma membrane // traceable author statement///0016020 // membrane // inferred from electronic annotation///0030425 // dendrite // inferred from electronic annotation///0043005 // neuron projection // inferred from electronic annotation///0043209 // myelin sh…	0000166 // nucleotide binding // inferred from electronic annotation///0003924 // GTPase activity // not recorded///0004871 // signal transducer activity // not recorded///0005525 // GTP binding // inferred from electronic annotation///0019001 // guanyl nucleotide binding // inferred from electronic annotation///0031683 // G-protein beta/gamma-subunit complex binding // not recorded///0031821 // …	chr16:56225428-56391355 (+) // 93.78 // q12.2
221725_at	0.0049219336	down	1.4888724	-1.4888724	-0.5742201	WASF2	10163	0001505 // regulation of neurotransmitter levels // inferred from electronic annotation///0001525 // angiogenesis // inferred from electronic annotation///0001667 // ameboidal-type cell migration // inferred from electronic annotation///0006897 // endocytosis // inferred from electronic annotation///0007186 // G-protein coupled receptor signaling pathway // inferred from electronic annotation///0…	0001726 // ruffle // inferred from electronic annotation///0005622 // intracellular // inferred from direct assay///0005737 // cytoplasm // inferred from electronic annotation///0005769 // early endosome // inferred from electronic annotation///0005829 // cytosol // traceable author statement///0005856 // cytoskeleton // inferred from electronic annotation///0005911 // cell-cell junction // infer…	0003779 // actin binding // inferred from electronic annotation///0004969 // histamine receptor activity // inferred from electronic annotation///0005515 // protein binding // inferred from physical interaction///0032403 // protein complex binding // inferred from direct assay///0032403 // protein complex binding // inferred from mutant phenotype	chr1:27730733-27816669 (-) // 95.54 // p36.11
215300_s_at	0.0012260161	down	1.5589906	-1.5589906	-0.64061224	FMO5	2330	0017144 // drug metabolic process // not recorded///0055114 // oxidation-reduction process // not recorded	0005737 // cytoplasm // inferred from direct assay///0005783 // endoplasmic reticulum // inferred from direct assay///0005789 // endoplasmic reticulum membrane // inferred from electronic annotation///0016020 // membrane // inferred from electronic annotation///0016021 // integral component of membrane // inferred from electronic annotation///0031090 // organelle membrane // inferred from electro…	0004497 // monooxygenase activity // inferred from electronic annotation///0004499 // N,N-dimethylaniline monooxygenase activity // not recorded///0016491 // oxidoreductase activity // inferred from electronic annotation///0050660 // flavin adenine dinucleotide binding // inferred from electronic annotation///0050661 // NADP binding // inferred from electronic annotation	chr1:146679987-146697220 (-) // 82.7 // q21.1
210036_s_at	0.049633037	down	1.6995854	-1.6995854	-0.76518285	KCNH2	3757	0000160 // phosphorelay signal transduction system // inferred from electronic annotation///0003064 // regulation of heart rate by hormone // traceable author statement///0006810 // transport // inferred from electronic annotation///0006811 // ion transport // inferred from electronic annotation///0006813 // potassium ion transport // inferred from electronic annotation///0007268 // synaptic tran…	0005622 // intracellular // inferred from electronic annotation///0005635 // nuclear envelope // inferred from electronic annotation///0005737 // cytoplasm // inferred from electronic annotation///0005886 // plasma membrane // inferred from direct assay///0005886 // plasma membrane // inferred from mutant phenotype///0005886 // plasma membrane // traceable author statement///0008076 // voltage-ga…	0000155 // phosphorelay sensor kinase activity // inferred from electronic annotation///0005216 // ion channel activity // inferred from electronic annotation///0005242 // inward rectifier potassium channel activity // inferred from direct assay///0005244 // voltage-gated ion channel activity // inferred from electronic annotation///0005249 // voltage-gated potassium channel activity // inferred …	chr7:150646521-150675178 (-) // 88.73 // q36.1
204041_at	0.024698284	down	1.8179051	-1.8179051	-0.86227685	MAOB	4129	0006805 // xenobiotic metabolic process // traceable author statement///0009636 // response to toxic substance // inferred from electronic annotation///0010044 // response to aluminum ion // inferred from electronic annotation///0010269 // response to selenium ion // inferred from electronic annotation///0014063 // negative regulation of serotonin secretion // inferred from electronic annotation/…	0005739 // mitochondrion // inferred from direct assay///0005740 // mitochondrial envelope // traceable author statement///0005741 // mitochondrial outer membrane // traceable author statement///0005743 // mitochondrial inner membrane // inferred from electronic annotation///0016020 // membrane // inferred from electronic annotation///0016021 // integral component of membrane // inferred from ele…	0008131 // primary amine oxidase activity // traceable author statement///0009055 // electron carrier activity // traceable author statement///0016491 // oxidoreductase activity // inferred from electronic annotation///0042803 // protein homodimerization activity // inferred from electronic annotation///0050660 // flavin adenine dinucleotide binding // inferred from electronic annotation	chrX:43625857-43741622 (-) // 93.01 // p11.3
205776_at	0.004576783	down	2.0509665	-2.0509665	-1.0363039	FMO5	2330	0017144 // drug metabolic process // not recorded///0055114 // oxidation-reduction process // not recorded	0005737 // cytoplasm // inferred from direct assay///0005783 // endoplasmic reticulum // inferred from direct assay///0005789 // endoplasmic reticulum membrane // inferred from electronic annotation///0016020 // membrane // inferred from electronic annotation///0016021 // integral component of membrane // inferred from electronic annotation///0031090 // organelle membrane // inferred from electro…	0004497 // monooxygenase activity // inferred from electronic annotation///0004499 // N,N-dimethylaniline monooxygenase activity // not recorded///0016491 // oxidoreductase activity // inferred from electronic annotation///0050660 // flavin adenine dinucleotide binding // inferred from electronic annotation///0050661 // NADP binding // inferred from electronic annotation	chr1:146657837-146696922 (-) // 95.74 // q21.1
213071_at	0.0070421123	down	2.7643254	-2.7643254	-1.4669274	DPT	1805	0007155 // cell adhesion // inferred from electronic annotation///0008285 // negative regulation of cell proliferation // inferred from electronic annotation///0030199 // collagen fibril organization // inferred from electronic annotation	0005576 // extracellular region // inferred from electronic annotation///0005578 // proteinaceous extracellular matrix // inferred from electronic annotation///0005615 // extracellular space // inferred from direct assay///0031012 // extracellular matrix // inferred from direct assay///0031012 // extracellular matrix // inferred from sequence or structural similarity///0070062 // extracellular ex…		chr1:168664705-168698421 (-) // 96.86 // q24.2
204388_s_at	8.42101E-9	down	2.8101077	-2.8101077	-1.4906254	MAOA	4128	0006576 // cellular biogenic amine metabolic process // traceable author statement///0006584 // catecholamine metabolic process // inferred from electronic annotation///0006805 // xenobiotic metabolic process // traceable author statement///0007268 // synaptic transmission // traceable author statement///0007269 // neurotransmitter secretion // traceable author statement///0042135 // neurotransmi…	0005739 // mitochondrion // inferred from direct assay///0005741 // mitochondrial outer membrane // traceable author statement///0016020 // membrane // inferred from electronic annotation///0016021 // integral component of membrane // inferred from electronic annotation	0005515 // protein binding // inferred from electronic annotation///0008131 // primary amine oxidase activity // traceable author statement///0016491 // oxidoreductase activity // inferred from electronic annotation///0050660 // flavin adenine dinucleotide binding // inferred from electronic annotation///0051378 // serotonin binding // inferred from electronic annotation	chrX:43515581-43604057 (+) // 98.03 // p11.3
212741_at	3.0647115E-7	down	2.8724802	-2.8724802	-1.5222969	MAOA	4128	0006576 // cellular biogenic amine metabolic process // traceable author statement///0006584 // catecholamine metabolic process // inferred from electronic annotation///0006805 // xenobiotic metabolic process // traceable author statement///0007268 // synaptic transmission // traceable author statement///0007269 // neurotransmitter secretion // traceable author statement///0042135 // neurotransmi…	0005739 // mitochondrion // inferred from direct assay///0005741 // mitochondrial outer membrane // traceable author statement///0016020 // membrane // inferred from electronic annotation///0016021 // integral component of membrane // inferred from electronic annotation	0005515 // protein binding // inferred from electronic annotation///0008131 // primary amine oxidase activity // traceable author statement///0016491 // oxidoreductase activity // inferred from electronic annotation///0050660 // flavin adenine dinucleotide binding // inferred from electronic annotation///0051378 // serotonin binding // inferred from electronic annotation	chrX:43603688-43606064 (+) // 98.63 // p11.3
204389_at	9.285586E-9	down	3.0486722	-3.0486722	-1.608181	MAOA	4128	0006576 // cellular biogenic amine metabolic process // traceable author statement///0006584 // catecholamine metabolic process // inferred from electronic annotation///0006805 // xenobiotic metabolic process // traceable author statement///0007268 // synaptic transmission // traceable author statement///0007269 // neurotransmitter secretion // traceable author statement///0042135 // neurotransmi…	0005739 // mitochondrion // inferred from direct assay///0005741 // mitochondrial outer membrane // traceable author statement///0016020 // membrane // inferred from electronic annotation///0016021 // integral component of membrane // inferred from electronic annotation	0005515 // protein binding // inferred from electronic annotation///0008131 // primary amine oxidase activity // traceable author statement///0016491 // oxidoreductase activity // inferred from electronic annotation///0050660 // flavin adenine dinucleotide binding // inferred from electronic annotation///0051378 // serotonin binding // inferred from electronic annotation	chrX:43515581-43604057 (+) // 98.03 // p11.3
213068_at	0.0042518075	down	3.6815195	-3.6815195	-1.8803014	DPT	1805	0007155 // cell adhesion // inferred from electronic annotation///0008285 // negative regulation of cell proliferation // inferred from electronic annotation///0030199 // collagen fibril organization // inferred from electronic annotation	0005576 // extracellular region // inferred from electronic annotation///0005578 // proteinaceous extracellular matrix // inferred from electronic annotation///0005615 // extracellular space // inferred from direct assay///0031012 // extracellular matrix // inferred from direct assay///0031012 // extracellular matrix // inferred from sequence or structural similarity///0070062 // extracellular ex…		chr1:168664705-168698421 (-) // 96.86 // q24.2
207977_s_at	0.0072097937	down	3.7026308	-3.7026308	-1.8885506	DPT	1805	0007155 // cell adhesion // inferred from electronic annotation///0008285 // negative regulation of cell proliferation // inferred from electronic annotation///0030199 // collagen fibril organization // inferred from electronic annotation	0005576 // extracellular region // inferred from electronic annotation///0005578 // proteinaceous extracellular matrix // inferred from electronic annotation///0005615 // extracellular space // inferred from direct assay///0031012 // extracellular matrix // inferred from direct assay///0031012 // extracellular matrix // inferred from sequence or structural similarity///0070062 // extracellular ex…		chr1:168665747-168698418 (-) // 90.24 // q24.2
