# Supplementary material for: Histaminergic System and Inflammation-Related Genes in Normal Large Intestine and Adenocarcinoma Tissues: Transcriptional Profiles and Relations
Source: Int J Mol Sci. 2023 Mar 3;24(5):4913. doi: 10.3390/ijms24054913 (PMC10002554; doi:10.3390/ijms24054913)
Supplement: Supplementary file 1 [file ijms-24-04913-s001.zip › Table S3. B.xlsx]

## Sheet: Inflam CRC 62 po t test
Probe Set ID	p (Corr)	p	Regulation	FC (abs)	FC	Log FC	Gene Symbol	Entrez Gene	Gene Ontology Biological Process	Gene Ontology Cellular Component	Gene Ontology Molecular Function	Alignments
202859_x_at	0.0026754271	5.1204348E-5	up	4.3820114	4.3820114	2.1315932	CXCL8	3576	0001525 // angiogenesis // traceable author statement///0002237 // response to molecule of bacterial origin // inferred from direct assay///0006928 // movement of cell or subcellular component // traceable author statement///0006935 // chemotaxis // traceable author statement///0006954 // inflammatory response // traceable author statement///0006955 // immune response // not recorded///0007050 //…	0005576 // extracellular region // traceable author statement///0005615 // extracellular space // inferred from electronic annotation///0005622 // intracellular // inferred from direct assay///0005622 // intracellular // traceable author statement	0005125 // cytokine activity // inferred from electronic annotation///0005153 // interleukin-8 receptor binding // inferred from physical interaction///0005515 // protein binding // inferred from physical interaction///0008009 // chemokine activity // traceable author statement	chr4:74606301-74609431 (+) // 70.71 // q13.3
209774_x_at	8.476019E-4	1.3518372E-5	up	4.176532	4.176532	2.0623055	CXCL2	2920	0002237 // response to molecule of bacterial origin // inferred from direct assay///0002690 // positive regulation of leukocyte chemotaxis // not recorded///0006935 // chemotaxis // traceable author statement///0006954 // inflammatory response // inferred from electronic annotation///0006955 // immune response // not recorded///0007186 // G-protein coupled receptor signaling pathway // not record…	0005576 // extracellular region // traceable author statement///0005615 // extracellular space // inferred from electronic annotation	0005125 // cytokine activity // inferred from electronic annotation///0005515 // protein binding // inferred from physical interaction///0008009 // chemokine activity // inferred from electronic annotation///0045236 // CXCR chemokine receptor binding // not recorded	chr4:74962800-74964892 (-) // 95.02 // q13.3
203936_s_at	9.2494454E-5	1.4751906E-7	up	3.6698852	3.6698852	1.8757349	MMP9	4318	0001501 // skeletal system development // inferred from electronic annotation///0001503 // ossification // inferred from electronic annotation///0001934 // positive regulation of protein phosphorylation // inferred from mutant phenotype///0006508 // proteolysis // inferred from direct assay///0007411 // axon guidance // traceable author statement///0007566 // embryo implantation // inferred from …	0005576 // extracellular region // traceable author statement///0005578 // proteinaceous extracellular matrix // inferred from electronic annotation///0005615 // extracellular space // inferred from direct assay///0031012 // extracellular matrix // inferred from electronic annotation///0070062 // extracellular exosome // inferred from direct assay	0004175 // endopeptidase activity // inferred from direct assay///0004222 // metalloendopeptidase activity // inferred from direct assay///0005509 // calcium ion binding // inferred from electronic annotation///0005515 // protein binding // inferred from physical interaction///0005518 // collagen binding // traceable author statement///0008233 // peptidase activity // inferred from electronic ann…	chr20:44637546-44645199 (+) // 97.17 // q13.12
207850_at	6.1003247E-4	4.4330577E-6	up	3.5341184	3.5341184	1.8213503	CXCL3	2921	0002690 // positive regulation of leukocyte chemotaxis // not recorded///0006935 // chemotaxis // inferred from electronic annotation///0006954 // inflammatory response // not recorded///0006955 // immune response // not recorded///0007186 // G-protein coupled receptor signaling pathway // not recorded///0030593 // neutrophil chemotaxis // inferred from sequence or structural similarity///0032496…	0005576 // extracellular region // traceable author statement///0005615 // extracellular space // inferred from direct assay	0005125 // cytokine activity // inferred from electronic annotation///0008009 // chemokine activity // not recorded///0008009 // chemokine activity // inferred from sequence or structural similarity///0045236 // CXCR chemokine receptor binding // not recorded	chr4:74902313-74904405 (-) // 92.86 // q13.3
204470_at	6.135812E-4	7.828788E-6	up	3.5210896	3.5210896	1.8160219	CXCL1	2919	0002690 // positive regulation of leukocyte chemotaxis // not recorded///0006935 // chemotaxis // traceable author statement///0006954 // inflammatory response // inferred from electronic annotation///0006955 // immune response // not recorded///0007165 // signal transduction // traceable author statement///0007186 // G-protein coupled receptor signaling pathway // traceable author statement///00…	0005576 // extracellular region // traceable author statement///0005615 // extracellular space // inferred from electronic annotation///0005622 // intracellular // traceable author statement	0005102 // receptor binding // traceable author statement///0005125 // cytokine activity // inferred from electronic annotation///0008009 // chemokine activity // inferred from electronic annotation///0008047 // enzyme activator activity // traceable author statement///0008083 // growth factor activity // inferred from electronic annotation///0045236 // CXCR chemokine receptor binding // not reco…	chr4:74735108-74736953 (+) // 100.0 // q13.3
212070_at	0.0028899382	6.4528125E-5	up	2.6802282	2.6802282	1.4223559	ADGRG1	9289	0001525 // angiogenesis // inferred from direct assay///0007155 // cell adhesion // inferred from electronic annotation///0007165 // signal transduction // inferred from electronic annotation///0007166 // cell surface receptor signaling pathway // inferred from electronic annotation///0007186 // G-protein coupled receptor signaling pathway // inferred from electronic annotation///0007266 // Rho p…	0005576 // extracellular region // inferred from electronic annotation///0005622 // intracellular // inferred from direct assay///0005886 // plasma membrane // inferred from electronic annotation///0005887 // integral component of plasma membrane // traceable author statement///0016020 // membrane // inferred from electronic annotation///0016021 // integral component of membrane // traceable auth…	0004871 // signal transducer activity // inferred from electronic annotation///0004888 // transmembrane signaling receptor activity // inferred from electronic annotation///0004930 // G-protein coupled receptor activity // inferred from sequence or structural similarity///0005518 // collagen binding // inferred from sequence or structural similarity///0050840 // extracellular matrix binding // in…	chr16:57662637-57699071 (+) // 85.48 // q21
209396_s_at	6.1003247E-4	3.3805898E-6	up	2.5237234	2.5237234	1.3355538	CHI3L1	1116	0005975 // carbohydrate metabolic process // inferred from electronic annotation///0006032 // chitin catabolic process // not recorded///0006915 // apoptotic process // inferred from electronic annotation///0006954 // inflammatory response // inferred from expression pattern///0007250 // activation of NF-kappaB-inducing kinase activity // inferred from sequence or structural similarity///0009612 …	0005576 // extracellular region // not recorded///0005578 // proteinaceous extracellular matrix // non-traceable author statement///0005615 // extracellular space // inferred from direct assay///0005737 // cytoplasm // inferred from sequence or structural similarity///0005783 // endoplasmic reticulum // inferred from sequence or structural similarity///0048471 // perinuclear region of cytoplasm /…	0004553 // hydrolase activity, hydrolyzing O-glycosyl compounds // inferred from electronic annotation///0004568 // chitinase activity // inferred from direct assay///0005201 // extracellular matrix structural constituent // non-traceable author statement///0008061 // chitin binding // inferred from direct assay///0030246 // carbohydrate binding // inferred from electronic annotation	chr1:203148056-203155822 (-) // 99.43 // q32.1
205499_at	6.135812E-4	7.073452E-6	up	2.4779177	2.4779177	1.3091283	SRPX2	27286	0001525 // angiogenesis // inferred from electronic annotation///0007155 // cell adhesion // inferred from electronic annotation///0016337 // single organismal cell-cell adhesion // inferred from direct assay///0042325 // regulation of phosphorylation // inferred from direct assay///0048870 // cell motility // inferred from direct assay///0051965 // positive regulation of synapse assembly // infe…	0005576 // extracellular region // inferred from electronic annotation///0005615 // extracellular space // inferred from direct assay///0005737 // cytoplasm // inferred from direct assay///0009986 // cell surface // inferred from sequence or structural similarity///0030054 // cell junction // inferred from electronic annotation///0045202 // synapse // inferred from electronic annotation///0060076…	0005102 // receptor binding // inferred from physical interaction///0005515 // protein binding // inferred from physical interaction///0036458 // hepatocyte growth factor binding // inferred from direct assay///0042802 // identical protein binding // inferred from direct assay	chrX:99899224-99926292 (+) // 97.23 // q22.1
201792_at	0.016832123	8.542019E-4	up	2.3809094	2.3809094	1.2515128	AEBP1	165	0000122 // negative regulation of transcription from RNA polymerase II promoter // inferred from mutant phenotype///0001501 // skeletal system development // traceable author statement///0006351 // transcription, DNA-templated // inferred from electronic annotation///0006355 // regulation of transcription, DNA-templated // inferred from electronic annotation///0006508 // proteolysis // inferred f…	0005576 // extracellular region // inferred from electronic annotation///0005615 // extracellular space // inferred from direct assay///0005634 // nucleus // inferred from electronic annotation///0005737 // cytoplasm // inferred from electronic annotation///0031012 // extracellular matrix // inferred from direct assay///0070062 // extracellular exosome // inferred from direct assay	0000977 // RNA polymerase II regulatory region sequence-specific DNA binding // inferred from direct assay///0001227 // transcriptional repressor activity, RNA polymerase II transcription regulatory region sequence-specific binding // inferred from direct assay///0001227 // transcriptional repressor activity, RNA polymerase II transcription regulatory region sequence-specific binding // inferred …	chr7:44144125-44154158 (+) // 94.84 // p13
209395_at	7.2458154E-4	1.0400692E-5	up	2.317583	2.317583	1.2126211	CHI3L1	1116	0005975 // carbohydrate metabolic process // inferred from electronic annotation///0006032 // chitin catabolic process // not recorded///0006915 // apoptotic process // inferred from electronic annotation///0006954 // inflammatory response // inferred from expression pattern///0007250 // activation of NF-kappaB-inducing kinase activity // inferred from sequence or structural similarity///0009612 …	0005576 // extracellular region // not recorded///0005578 // proteinaceous extracellular matrix // non-traceable author statement///0005615 // extracellular space // inferred from direct assay///0005737 // cytoplasm // inferred from sequence or structural similarity///0005783 // endoplasmic reticulum // inferred from sequence or structural similarity///0048471 // perinuclear region of cytoplasm /…	0004553 // hydrolase activity, hydrolyzing O-glycosyl compounds // inferred from electronic annotation///0004568 // chitinase activity // inferred from direct assay///0005201 // extracellular matrix structural constituent // non-traceable author statement///0008061 // chitin binding // inferred from direct assay///0030246 // carbohydrate binding // inferred from electronic annotation	chr1:203148056-203155822 (-) // 99.43 // q32.1
206025_s_at	0.010481677	4.179297E-4	up	2.302815	2.302815	1.2033985	TNFAIP6	7130	0006954 // inflammatory response // traceable author statement///0007155 // cell adhesion // inferred from electronic annotation///0007165 // signal transduction // traceable author statement///0007267 // cell-cell signaling // traceable author statement///0030335 // positive regulation of cell migration // inferred from electronic annotation///0030728 // ovulation // inferred from electronic ann…	0005615 // extracellular space // inferred from electronic annotation	0005540 // hyaluronic acid binding // inferred from electronic annotation	chr2:152214105-152236553 (+) // 70.63 // q23.3
212657_s_at	0.024695205	0.0015754517	up	2.169485	2.169485	1.1173526	IL1RN	3557	0001660 // fever generation // inferred from electronic annotation///0001960 // negative regulation of cytokine-mediated signaling pathway // inferred from direct assay///0002437 // inflammatory response to antigenic stimulus // ---///0002439 // chronic inflammatory response to antigenic stimulus // inferred from electronic annotation///0006629 // lipid metabolic process // inferred from electron…	0005576 // extracellular region // inferred from electronic annotation///0005615 // extracellular space // inferred from direct assay///0005622 // intracellular // non-traceable author statement///0005737 // cytoplasm // inferred from electronic annotation///0005886 // plasma membrane // traceable author statement///0031982 // vesicle // inferred from electronic annotation///0070062 // extracellu…	0005125 // cytokine activity // not recorded///0005149 // interleukin-1 receptor binding // inferred from direct assay///0005150 // interleukin-1, Type I receptor binding // inferred from physical interaction///0005151 // interleukin-1, Type II receptor binding // inferred from physical interaction///0005152 // interleukin-1 receptor antagonist activity // inferred from direct assay///0005152 // …	chr2:113885169-113891593 (+) // 73.62 // q13
202207_at	0.0033978769	9.212744E-5	up	1.9928638	1.9928638	0.99484307	ARL4C	10123	0006810 // transport // inferred from electronic annotation///0006886 // intracellular protein transport // inferred from electronic annotation///0007264 // small GTPase mediated signal transduction // inferred from electronic annotation///0008152 // metabolic process // traceable author statement///0015031 // protein transport // inferred from electronic annotation///0032456 // endocytic recycli…	0005622 // intracellular // inferred from electronic annotation///0005634 // nucleus // traceable author statement///0005737 // cytoplasm // inferred from direct assay///0005886 // plasma membrane // inferred from direct assay///0016020 // membrane // inferred from electronic annotation///0030175 // filopodium // inferred from electronic annotation///0042995 // cell projection // inferred from el…	0000166 // nucleotide binding // inferred from electronic annotation///0003924 // GTPase activity // traceable author statement///0005515 // protein binding // inferred from physical interaction///0005525 // GTP binding // inferred from electronic annotation///0043014 // alpha-tubulin binding // inferred from direct assay	chr2:235401681-235405622 (-) // 95.42 // q37.1
205569_at	8.541594E-4	1.4985253E-5	up	1.8178028	1.8178028	0.8621957	LAMP3	27074	0002250 // adaptive immune response // inferred from electronic annotation///0002376 // immune system process // inferred from electronic annotation///0008283 // cell proliferation // traceable author statement	0005764 // lysosome // inferred from electronic annotation///0005765 // lysosomal membrane // inferred from electronic annotation///0016020 // membrane // inferred from electronic annotation///0016021 // integral component of membrane // inferred from electronic annotation///0030659 // cytoplasmic vesicle membrane // inferred from electronic annotation///0031410 // cytoplasmic vesicle // inferred…		chr3:182840003-182880506 (-) // 83.42 // q27.1
201587_s_at	6.135812E-4	6.6924945E-6	up	1.8043158	1.8043158	0.8514519	IRAK1	3654	0000187 // activation of MAPK activity // traceable author statement///0001959 // regulation of cytokine-mediated signaling pathway // inferred from mutant phenotype///0002224 // toll-like receptor signaling pathway // traceable author statement///0002376 // immune system process // inferred from electronic annotation///0002755 // MyD88-dependent toll-like receptor signaling pathway // traceable …	0005622 // intracellular // ---///0005634 // nucleus // inferred from direct assay///0005737 // cytoplasm // inferred from direct assay///0005811 // lipid particle // inferred from sequence or structural similarity///0005829 // cytosol // traceable author statement///0005886 // plasma membrane // not recorded///0005886 // plasma membrane // traceable author statement///0010008 // endosome membran…	0000166 // nucleotide binding // inferred from electronic annotation///0004672 // protein kinase activity // inferred from direct assay///0004672 // protein kinase activity // traceable author statement///0004674 // protein serine/threonine kinase activity // not recorded///0004674 // protein serine/threonine kinase activity // non-traceable author statement///0004704 // NF-kappaB-inducing kinase…	chrX:153275961-153285342 (-) // 87.8 // q28
206026_s_at	0.007707039	2.581305E-4	up	1.7834448	1.7834448	0.83466655	TNFAIP6	7130	0006954 // inflammatory response // traceable author statement///0007155 // cell adhesion // inferred from electronic annotation///0007165 // signal transduction // traceable author statement///0007267 // cell-cell signaling // traceable author statement///0030335 // positive regulation of cell migration // inferred from electronic annotation///0030728 // ovulation // inferred from electronic ann…	0005615 // extracellular space // inferred from electronic annotation	0005540 // hyaluronic acid binding // inferred from electronic annotation	chr2:152214119-152236553 (+) // 69.45 // q23.3
217523_at	0.021059752	0.0012007104	up	1.6750648	1.6750648	0.7442169	CD44	960	0001658 // branching involved in ureteric bud morphogenesis // inferred from electronic annotation///0002246 // wound healing involved in inflammatory response // inferred from electronic annotation///0005975 // carbohydrate metabolic process // traceable author statement///0007155 // cell adhesion // inferred from electronic annotation///0007160 // cell-matrix adhesion // non-traceable author st…	0005737 // cytoplasm // inferred from direct assay///0005794 // Golgi apparatus // inferred from direct assay///0005886 // plasma membrane // inferred from direct assay///0005886 // plasma membrane // traceable author statement///0005887 // integral component of plasma membrane // non-traceable author statement///0005925 // focal adhesion // inferred from direct assay///0009897 // external side o…	0004415 // hyalurononglucosaminidase activity // inferred from direct assay///0004896 // cytokine receptor activity // inferred from direct assay///0005515 // protein binding // inferred from physical interaction///0005518 // collagen binding // non-traceable author statement///0005540 // hyaluronic acid binding // inferred from direct assay///0005540 // hyaluronic acid binding // non-traceable a…	chr11:35218274-35218983 (+) // 99.3 // p13
219257_s_at	6.1003247E-4	4.8646925E-6	up	1.6687276	1.6687276	0.7387485	SPHK1	8877	0001568 // blood vessel development // inferred from electronic annotation///0001934 // positive regulation of protein phosphorylation // inferred from electronic annotation///0001956 // positive regulation of neurotransmitter secretion // inferred from electronic annotation///0003376 // sphingosine-1-phosphate signaling pathway // inferred from mutant phenotype///0006457 // protein folding // tr…	0005634 // nucleus // inferred from electronic annotation///0005737 // cytoplasm // inferred from direct assay///0005829 // cytosol // traceable author statement///0005886 // plasma membrane // inferred from direct assay///0008021 // synaptic vesicle // inferred from electronic annotation///0016020 // membrane // inferred from electronic annotation///0030424 // axon // inferred from electronic an…	0000166 // nucleotide binding // inferred from electronic annotation///0000287 // magnesium ion binding // inferred from direct assay///0000287 // magnesium ion binding // inferred from sequence or structural similarity///0003677 // DNA binding // inferred from direct assay///0005515 // protein binding // inferred from physical interaction///0005516 // calmodulin binding // inferred from direct a…	chr17:74380745-74383941 (+) // 98.49 // q25.1
217733_s_at	0.00815284	2.9906747E-4	up	1.559385	1.559385	0.6409771	TMSB10	9168	0007015 // actin filament organization // inferred from electronic annotation///0030036 // actin cytoskeleton organization // inferred from electronic annotation///0042989 // sequestering of actin monomers // inferred from electronic annotation	0005737 // cytoplasm // inferred from electronic annotation///0005856 // cytoskeleton // inferred from electronic annotation	0003779 // actin binding // inferred from electronic annotation///0003785 // actin monomer binding // inferred from electronic annotation///0005515 // protein binding // inferred from physical interaction	chr2:85132792-85133799 (+) // 99.78 // p11.2
210357_s_at	0.0038370283	1.10153924E-4	up	1.5562153	1.5562153	0.6380417	SMOX	54498	0006595 // polyamine metabolic process // traceable author statement///0006596 // polyamine biosynthetic process // traceable author statement///0006598 // polyamine catabolic process // inferred from direct assay///0006805 // xenobiotic metabolic process // traceable author statement///0034641 // cellular nitrogen compound metabolic process // traceable author statement///0044281 // small molecu…	0005634 // nucleus // inferred from direct assay///0005634 // nucleus // inferred from electronic annotation///0005737 // cytoplasm // inferred from direct assay///0005829 // cytosol // traceable author statement	0016491 // oxidoreductase activity // inferred from electronic annotation///0046592 // polyamine oxidase activity // inferred from direct assay///0052894 // norspermine:oxygen oxidoreductase activity // inferred from electronic annotation///0052895 // N1-acetylspermine:oxygen oxidoreductase (N1-acetylspermidine-forming) activity // inferred from electronic annotation///0052901 // spermine:oxygen …	chr20:4129507-4168368 (+) // 98.54 // p13
202206_at	0.016832123	8.136063E-4	up	1.5531456	1.5531456	0.6351931	ARL4C	10123	0006810 // transport // inferred from electronic annotation///0006886 // intracellular protein transport // inferred from electronic annotation///0007264 // small GTPase mediated signal transduction // inferred from electronic annotation///0008152 // metabolic process // traceable author statement///0015031 // protein transport // inferred from electronic annotation///0032456 // endocytic recycli…	0005622 // intracellular // inferred from electronic annotation///0005634 // nucleus // traceable author statement///0005737 // cytoplasm // inferred from direct assay///0005886 // plasma membrane // inferred from direct assay///0016020 // membrane // inferred from electronic annotation///0030175 // filopodium // inferred from electronic annotation///0042995 // cell projection // inferred from el…	0000166 // nucleotide binding // inferred from electronic annotation///0003924 // GTPase activity // traceable author statement///0005515 // protein binding // inferred from physical interaction///0005525 // GTP binding // inferred from electronic annotation///0043014 // alpha-tubulin binding // inferred from direct assay	chr2:235401681-235405622 (-) // 95.42 // q37.1
218368_s_at	0.0076778815	2.449085E-4	up	1.5102597	1.5102597	0.5947967	TNFRSF12A	51330	0001525 // angiogenesis // inferred from electronic annotation///0006915 // apoptotic process // inferred from electronic annotation///0006931 // substrate-dependent cell migration, cell attachment to substrate // inferred from electronic annotation///0007155 // cell adhesion // inferred from electronic annotation///0007275 // multicellular organismal development // inferred from electronic annot…	0001726 // ruffle // inferred from electronic annotation///0005886 // plasma membrane // traceable author statement///0009986 // cell surface // inferred from electronic annotation///0016020 // membrane // inferred from electronic annotation///0016021 // integral component of membrane // inferred from electronic annotation	0005515 // protein binding // inferred from physical interaction	chr16:3070359-3072381 (+) // 96.69 // p13.3
202208_s_at	0.012247031	5.0785136E-4	up	1.4895773	1.4895773	0.57490295	ARL4C	10123	0006810 // transport // inferred from electronic annotation///0006886 // intracellular protein transport // inferred from electronic annotation///0007264 // small GTPase mediated signal transduction // inferred from electronic annotation///0008152 // metabolic process // traceable author statement///0015031 // protein transport // inferred from electronic annotation///0032456 // endocytic recycli…	0005622 // intracellular // inferred from electronic annotation///0005634 // nucleus // traceable author statement///0005737 // cytoplasm // inferred from direct assay///0005886 // plasma membrane // inferred from direct assay///0016020 // membrane // inferred from electronic annotation///0030175 // filopodium // inferred from electronic annotation///0042995 // cell projection // inferred from el…	0000166 // nucleotide binding // inferred from electronic annotation///0003924 // GTPase activity // traceable author statement///0005515 // protein binding // inferred from physical interaction///0005525 // GTP binding // inferred from electronic annotation///0043014 // alpha-tubulin binding // inferred from direct assay	chr2:235403805-235405204 (-) // 94.67 // q37.1
219710_at	0.016832123	8.5905567E-4	up	1.4461635	1.4461635	0.5322307	SH3TC2	79628	0022011 // myelination in peripheral nervous system // inferred from electronic annotation///0032287 // peripheral nervous system myelin maintenance // inferred from electronic annotation///0033157 // regulation of intracellular protein transport // inferred from electronic annotation///1901184 // regulation of ERBB signaling pathway // inferred from electronic annotation	0005886 // plasma membrane // inferred from electronic annotation///0031410 // cytoplasmic vesicle // inferred from electronic annotation///0055037 // recycling endosome // inferred from electronic annotation		chr5:148383515-148387341 (-) // 80.63 // q32
204924_at	0.042375337	0.0036495507	up	1.4413658	1.4413658	0.52743655	TLR2	7097	0001666 // response to hypoxia // inferred from electronic annotation///0001774 // microglial cell activation // inferred from electronic annotation///0002224 // toll-like receptor signaling pathway // traceable author statement///0002237 // response to molecule of bacterial origin // inferred from electronic annotation///0002238 // response to molecule of fungal origin // inferred from electroni…	0005737 // cytoplasm // inferred from direct assay///0005794 // Golgi apparatus // inferred from direct assay///0005886 // plasma membrane // inferred from direct assay///0005886 // plasma membrane // traceable author statement///0005887 // integral component of plasma membrane // traceable author statement///0009897 // external side of plasma membrane // inferred from electronic annotation///000…	0001530 // lipopolysaccharide binding // inferred from direct assay///0001875 // lipopolysaccharide receptor activity // traceable author statement///0004872 // receptor activity // inferred from direct assay///0004888 // transmembrane signaling receptor activity // inferred from electronic annotation///0005515 // protein binding // inferred from physical interaction///0008329 // signaling patter…	chr4:154624037-154626530 (+) // 95.77 // q31.3
205254_x_at	0.00815284	2.924787E-4	up	1.4332162	1.4332162	0.51925623	TCF7	6932	0006351 // transcription, DNA-templated // inferred from electronic annotation///0006355 // regulation of transcription, DNA-templated // inferred from electronic annotation///0006355 // regulation of transcription, DNA-templated // ---///0006357 // regulation of transcription from RNA polymerase II promoter // not recorded///0006955 // immune response // traceable author statement///0007420 // b…	0005634 // nucleus // inferred from direct assay///0005654 // nucleoplasm // traceable author statement///0005667 // transcription factor complex // not recorded	0003677 // DNA binding // inferred from electronic annotation///0003682 // chromatin binding // not recorded///0003700 // transcription factor activity, sequence-specific DNA binding // not recorded///0005515 // protein binding // inferred from physical interaction///0008013 // beta-catenin binding // inferred from direct assay///0043565 // sequence-specific DNA binding // not recorded///0044212 …	chr5:133451315-133483919 (+) // 89.28 // q31.1
205255_x_at	0.0033978769	9.046028E-5	up	1.4324069	1.4324069	0.5184414	TCF7	6932	0006351 // transcription, DNA-templated // inferred from electronic annotation///0006355 // regulation of transcription, DNA-templated // inferred from electronic annotation///0006355 // regulation of transcription, DNA-templated // ---///0006357 // regulation of transcription from RNA polymerase II promoter // not recorded///0006955 // immune response // traceable author statement///0007420 // b…	0005634 // nucleus // inferred from direct assay///0005654 // nucleoplasm // traceable author statement///0005667 // transcription factor complex // not recorded	0003677 // DNA binding // inferred from electronic annotation///0003682 // chromatin binding // not recorded///0003700 // transcription factor activity, sequence-specific DNA binding // not recorded///0005515 // protein binding // inferred from physical interaction///0008013 // beta-catenin binding // inferred from direct assay///0043565 // sequence-specific DNA binding // not recorded///0044212 …	chr5:133451315-133483919 (+) // 89.07 // q31.1
200989_at	0.04515324	0.0040712417	up	1.427683	1.427683	0.5136757	HIF1A	3091	0001525 // angiogenesis // inferred from electronic annotation///0001568 // blood vessel development // inferred from electronic annotation///0001666 // response to hypoxia // inferred from direct assay///0001666 // response to hypoxia // inferred from mutant phenotype///0001755 // neural crest cell migration // inferred from electronic annotation///0001837 // epithelial to mesenchymal transition…	0005634 // nucleus // inferred from direct assay///0005654 // nucleoplasm // traceable author statement///0005667 // transcription factor complex // inferred from physical interaction///0005730 // nucleolus // inferred from direct assay///0005737 // cytoplasm // inferred from direct assay///0005829 // cytosol // inferred from direct assay///0005829 // cytosol // traceable author statement///00166…	0000981 // RNA polymerase II transcription factor activity, sequence-specific DNA binding // inferred from electronic annotation///0000989 // transcription factor activity, transcription factor binding // inferred from direct assay///0001076 // transcription factor activity, RNA polymerase II transcription factor binding // inferred from electronic annotation///0001077 // transcriptional activato…	chr14:62162272-62214970 (+) // 99.08 // q23.2
219725_at	0.0033366813	7.982491E-5	up	1.4002489	1.4002489	0.48568326	TREM2	54209	0002588 // positive regulation of antigen processing and presentation of peptide antigen via MHC class II // inferred from direct assay///0006959 // humoral immune response // traceable author statement///0007411 // axon guidance // traceable author statement///0032497 // detection of lipopolysaccharide // inferred from electronic annotation///0032499 // detection of peptidoglycan // inferred fro…	0005576 // extracellular region // inferred from electronic annotation///0005886 // plasma membrane // traceable author statement///0016020 // membrane // inferred from electronic annotation///0016021 // integral component of membrane // inferred from direct assay///0043231 // intracellular membrane-bounded organelle // inferred from direct assay	0001530 // lipopolysaccharide binding // inferred from electronic annotation///0004872 // receptor activity // traceable author statement///0005515 // protein binding // inferred from electronic annotation///0042834 // peptidoglycan binding // inferred from electronic annotation///0070891 // lipoteichoic acid binding // inferred from electronic annotation///0097110 // scaffold protein binding // …	chr6:41126252-41130914 (-) // 99.52 // p21.1
206236_at	0.0027353654	5.6714114E-5	up	1.3699385	1.3699385	0.45411113	GPR4	2828	0007165 // signal transduction // inferred from electronic annotation///0007186 // G-protein coupled receptor signaling pathway // inferred from electronic annotation	0005886 // plasma membrane // traceable author statement///0005887 // integral component of plasma membrane // traceable author statement///0016020 // membrane // inferred from electronic annotation///0016021 // integral component of membrane // inferred from electronic annotation	0004871 // signal transducer activity // inferred from electronic annotation///0004930 // G-protein coupled receptor activity // inferred from electronic annotation	chr19:46093024-46095717 (-) // 83.68 // q13.32
218014_at	0.0495594	0.004786187	up	1.340471	1.340471	0.42274004	NUP85	79902	0000278 // mitotic cell cycle // traceable author statement///0005975 // carbohydrate metabolic process // traceable author statement///0006406 // mRNA export from nucleus // not recorded///0006606 // protein import into nucleus // not recorded///0006810 // transport // inferred from electronic annotation///0006935 // chemotaxis // inferred from electronic annotation///0007077 // mitotic nuclear …	0000775 // chromosome, centromeric region // inferred from electronic annotation///0000776 // kinetochore // inferred from direct assay///0000777 // condensed chromosome kinetochore // inferred from electronic annotation///0005634 // nucleus // inferred from electronic annotation///0005635 // nuclear envelope // traceable author statement///0005643 // nuclear pore // inferred from electronic anno…	0005515 // protein binding // inferred from physical interaction///0017056 // structural constituent of nuclear pore // not recorded	chr17:73201785-73231852 (+) // 98.6 // q25.1
205130_at	0.049885087	0.0049328157	up	1.2984195	1.2984195	0.37675655	MOK	5891	0006468 // protein phosphorylation // inferred from electronic annotation///0007165 // signal transduction // traceable author statement///0016310 // phosphorylation // inferred from electronic annotation///0051726 // regulation of cell cycle // inferred from electronic annotation	0005737 // cytoplasm // inferred from electronic annotation	0000166 // nucleotide binding // inferred from electronic annotation///0004672 // protein kinase activity // traceable author statement///0004674 // protein serine/threonine kinase activity // traceable author statement///0004693 // cyclin-dependent protein serine/threonine kinase activity // inferred from electronic annotation///0005524 // ATP binding // inferred from electronic annotation///001…	chr14:102695178-102771531 (-) // 98.87 // q32.31
213449_at	0.031172143	0.0022945614	up	1.2983823	1.2983823	0.3767152	POP1	10940	0001682 // tRNA 5'-leader removal // inferred from electronic annotation///0006396 // RNA processing // inferred from electronic annotation///0008033 // tRNA processing // not recorded///0008033 // tRNA processing // traceable author statement///0010467 // gene expression // traceable author statement///0016078 // tRNA catabolic process // inferred from direct assay///0090501 // RNA phosphodieste…	0000172 // ribonuclease MRP complex // inferred from direct assay///0005615 // extracellular space // inferred from direct assay///0005634 // nucleus // inferred from electronic annotation///0005654 // nucleoplasm // traceable author statement///0005655 // nucleolar ribonuclease P complex // inferred from direct assay///0005730 // nucleolus // inferred from electronic annotation	0000171 // ribonuclease MRP activity // inferred from direct assay///0004526 // ribonuclease P activity // inferred from direct assay///0005515 // protein binding // inferred from physical interaction///0016787 // hydrolase activity // inferred from electronic annotation///0044822 // poly(A) RNA binding // inferred from direct assay	chr8:99129542-99172063 (+) // 92.34 // q22.2
221331_x_at	0.016609484	7.5605785E-4	up	1.2723256	1.2723256	0.34746796	CTLA4	1493	0002250 // adaptive immune response // inferred from electronic annotation///0002376 // immune system process // inferred from electronic annotation///0006955 // immune response // traceable author statement///0006974 // cellular response to DNA damage stimulus // inferred from mutant phenotype///0030889 // negative regulation of B cell proliferation // inferred from mutant phenotype///0031295 //…	0005794 // Golgi apparatus // inferred from direct assay///0005886 // plasma membrane // traceable author statement///0005887 // integral component of plasma membrane // traceable author statement///0009897 // external side of plasma membrane // inferred from direct assay///0016020 // membrane // inferred from electronic annotation///0016021 // integral component of membrane // inferred from elec…	0005515 // protein binding // inferred from physical interaction	chr2:204732665-204737535 (+) // 99.7 // q33.2
211396_at	0.027443733	0.0018358702	up	1.2719773	1.2719773	0.34707293	FCGR2C	9103	0006955 // immune response // non-traceable author statement///0007165 // signal transduction // non-traceable author statement	0005737 // cytoplasm // inferred from electronic annotation///0005886 // plasma membrane // inferred from electronic annotation///0016020 // membrane // inferred from electronic annotation///0016021 // integral component of membrane // non-traceable author statement	0004888 // transmembrane signaling receptor activity // non-traceable author statement///0005515 // protein binding // inferred from physical interaction///0019864 // IgG binding // inferred from electronic annotation	chr1:161551225-161562032 (+) // 91.81 // q23.3
210367_s_at	0.031172143	0.002356847	up	1.2670444	1.2670444	0.3414671	PTGES	9536	0001516 // prostaglandin biosynthetic process // inferred from direct assay///0002526 // acute inflammatory response // inferred from electronic annotation///0002544 // chronic inflammatory response // inferred from electronic annotation///0006629 // lipid metabolic process // inferred from electronic annotation///0006631 // fatty acid metabolic process // inferred from electronic annotation///00…	0005641 // nuclear envelope lumen // inferred from electronic annotation///0005737 // cytoplasm // inferred from electronic annotation///0005789 // endoplasmic reticulum membrane // traceable author statement///0016020 // membrane // traceable author statement///0016021 // integral component of membrane // inferred from direct assay///0043231 // intracellular membrane-bounded organelle // inferre…	0016853 // isomerase activity // inferred from electronic annotation///0043295 // glutathione binding // inferred from direct assay///0050220 // prostaglandin-E synthase activity // not recorded///0050220 // prostaglandin-E synthase activity // inferred from direct assay	chr9:132500628-132515300 (-) // 67.9 // q34.11
204382_at	0.021059752	0.0012091723	up	1.2527745	1.2527745	0.3251267	NAT9	26151	0006474 // N-terminal protein amino acid acetylation // not recorded///0008152 // metabolic process // inferred from electronic annotation	0043234 // protein complex // inferred from direct assay	0005515 // protein binding // inferred from physical interaction///0008080 // N-acetyltransferase activity // not recorded///0016740 // transferase activity // inferred from electronic annotation///0016746 // transferase activity, transferring acyl groups // inferred from electronic annotation	chr17:72766687-72772436 (-) // 95.07 // q25.1
205926_at	0.028175846	0.0019323148	up	1.2452714	1.2452714	0.31646025	IL27RA	9466	0002827 // positive regulation of T-helper 1 type immune response // inferred from electronic annotation///0002829 // negative regulation of type 2 immune response // inferred from electronic annotation///0006955 // immune response // traceable author statement///0007166 // cell surface receptor signaling pathway // traceable author statement///0032729 // positive regulation of interferon-gamma p…	0005887 // integral component of plasma membrane // traceable author statement///0016020 // membrane // inferred from electronic annotation///0016021 // integral component of membrane // inferred from electronic annotation	0004888 // transmembrane signaling receptor activity // traceable author statement///0005515 // protein binding // inferred from electronic annotation///0045509 // interleukin-27 receptor activity // inferred from electronic annotation	chr19:14142551-14163716 (+) // 84.64 // p13.12
220066_at	0.03966476	0.0032263203	up	1.2377875	1.2377875	0.30776364	NOD2	64127	0000187 // activation of MAPK activity // traceable author statement///0002224 // toll-like receptor signaling pathway // traceable author statement///0002227 // innate immune response in mucosa // inferred from electronic annotation///0002253 // activation of immune response // inferred from electronic annotation///0002367 // cytokine production involved in immune response // inferred from mutan…	0005737 // cytoplasm // inferred from direct assay///0005737 // cytoplasm // traceable author statement///0005829 // cytosol // inferred from direct assay///0005829 // cytosol // traceable author statement///0005856 // cytoskeleton // inferred from direct assay///0005886 // plasma membrane // inferred from direct assay///0008180 // COP9 signalosome // inferred from direct assay///0009986 // cell …	0000166 // nucleotide binding // inferred from electronic annotation///0003779 // actin binding // inferred from direct assay///0005515 // protein binding // inferred from physical interaction///0005524 // ATP binding // inferred from electronic annotation///0019899 // enzyme binding // inferred from physical interaction///0019901 // protein kinase binding // inferred from physical interaction///…	chr16:50731049-50766987 (+) // 98.51 // q12.1
214467_at	0.029019967	0.0020744298	up	1.2260703	1.2260703	0.2940417	GPR65	8477	0006915 // apoptotic process // inferred from electronic annotation///0006955 // immune response // traceable author statement///0007165 // signal transduction // inferred from electronic annotation///0007186 // G-protein coupled receptor signaling pathway // inferred from direct assay///0007275 // multicellular organismal development // traceable author statement///0010447 // response to acidic …	0005886 // plasma membrane // inferred from direct assay///0005886 // plasma membrane // traceable author statement///0005887 // integral component of plasma membrane // traceable author statement///0016020 // membrane // inferred from electronic annotation///0016021 // integral component of membrane // inferred from electronic annotation	0004871 // signal transducer activity // inferred from electronic annotation///0004930 // G-protein coupled receptor activity // inferred from direct assay	chr14:88477191-88478419 (+) // 91.3 // q31.3
217507_at	0.0495594	0.004596193	up	1.2234205	1.2234205	0.29092035	SLC11A1	6556	0000060 // protein import into nucleus, translocation // inferred from electronic annotation///0001818 // negative regulation of cytokine production // inferred from sequence or structural similarity///0001819 // positive regulation of cytokine production // inferred from sequence or structural similarity///0002309 // T cell proliferation involved in immune response // inferred from sequence or s…	0005764 // lysosome // inferred from sequence or structural similarity///0005770 // late endosome // inferred from sequence or structural similarity///0005886 // plasma membrane // inferred from mutant phenotype///0005887 // integral component of plasma membrane // non-traceable author statement///0009279 // cell outer membrane // inferred from electronic annotation///0010008 // endosome membrane…	0005215 // transporter activity // inferred from electronic annotation///0005384 // manganese ion transmembrane transporter activity // inferred from sequence or structural similarity///0042803 // protein homodimerization activity // inferred from direct assay///0046915 // transition metal ion transmembrane transporter activity // inferred from genetic interaction///0051139 // metal ion:proton an…	chr2:219260269-219260758 (+) // 58.08 // q35
208068_x_at	0.042375337	0.0035604786	up	1.1983101	1.1983101	0.26100135	CSH1///CSHL1///GH1///GH2	1442///1444///2688///2689	0002092 // positive regulation of receptor internalization // inferred from direct assay///0007259 // JAK-STAT cascade // inferred from direct assay///0010535 // positive regulation of activation of JAK2 kinase activity // inferred from direct assay///0014068 // positive regulation of phosphatidylinositol 3-kinase signaling // inferred from direct assay///0015758 // glucose transport // inferred …	0005576 // extracellular region // traceable author statement///0005576 // extracellular region // inferred from electronic annotation///0005615 // extracellular space // inferred from direct assay///0005622 // intracellular // inferred from direct assay///0005622 // intracellular // traceable author statement///0005783 // endoplasmic reticulum // inferred from direct assay///0031988 // membrane-…	0005131 // growth hormone receptor binding // inferred from direct assay///0005131 // growth hormone receptor binding // inferred from physical interaction///0005148 // prolactin receptor binding // inferred from direct assay///0005148 // prolactin receptor binding // inferred from physical interaction///0005179 // hormone activity // inferred from electronic annotation///0005179 // hormone activ…	chr17:61994562-61996198 (-) // 99.73 // q23.3///chr17:61957574-61959223 (-) // 96.8 // q23.3
220446_s_at	0.0495594	0.0048215683	up	1.1527979	1.1527979	0.20513965	CHST4	10164	0005975 // carbohydrate metabolic process // inferred from electronic annotation///0006044 // N-acetylglucosamine metabolic process // inferred from direct assay///0006477 // protein sulfation // traceable author statement///0006790 // sulfur compound metabolic process // inferred from direct assay///0006928 // movement of cell or subcellular component // traceable author statement///0006954 // i…	0000139 // Golgi membrane // not recorded///0005794 // Golgi apparatus // inferred from electronic annotation///0005802 // trans-Golgi network // inferred from direct assay///0016020 // membrane // inferred from electronic annotation///0016021 // integral component of membrane // not recorded///0031228 // intrinsic component of Golgi membrane // non-traceable author statement	0001517 // N-acetylglucosamine 6-O-sulfotransferase activity // inferred from direct assay///0008146 // sulfotransferase activity // traceable author statement///0016740 // transferase activity // inferred from electronic annotation	chr16:71560060-71572416 (+) // 98.82 // q22.2
217562_at	0.04515324	0.00410484	down	1.1443259	-1.1443259	-0.19449793	BRINP3	339479	0007049 // cell cycle // inferred from electronic annotation///0007050 // cell cycle arrest // inferred from electronic annotation///0007399 // nervous system development // inferred from electronic annotation///0045666 // positive regulation of neuron differentiation // inferred from sequence or structural similarity///0045786 // negative regulation of cell cycle // inferred from electronic anno…	0005576 // extracellular region // inferred from electronic annotation///0005739 // mitochondrion // inferred from electronic annotation///0005783 // endoplasmic reticulum // inferred from electronic annotation///0030425 // dendrite // inferred from electronic annotation///0043025 // neuronal cell body // inferred from electronic annotation		chr1:190066796-190067258 (-) // 96.45 // q31.1
201701_s_at	0.01729852	9.104484E-4	down	1.2870466	-1.2870466	-0.36406422	PGRMC2	10424	0043401 // steroid hormone mediated signaling pathway // traceable author statement	0012505 // endomembrane system // not recorded///0016020 // membrane // inferred from direct assay///0016021 // integral component of membrane // inferred from electronic annotation	0003707 // steroid hormone receptor activity // traceable author statement///0005496 // steroid binding // inferred from electronic annotation///0008289 // lipid binding // inferred from electronic annotation///0020037 // heme binding // not recorded	chr4:129191298-129208948 (-) // 88.63 // q28.2
206170_at	0.024376042	0.0014773359	down	1.2995905	-1.2995905	-0.37805706	ADRB2	154	0001666 // response to hypoxia // inferred from electronic annotation///0001889 // liver development // inferred from electronic annotation///0001993 // regulation of systemic arterial blood pressure by norepinephrine-epinephrine // inferred from electronic annotation///0002024 // diet induced thermogenesis // inferred from electronic annotation///0002025 // vasodilation by norepinephrine-epineph…	0005634 // nucleus // inferred from electronic annotation///0005737 // cytoplasm // inferred from electronic annotation///0005764 // lysosome // traceable author statement///0005768 // endosome // inferred from electronic annotation///0005886 // plasma membrane // inferred from direct assay///0005886 // plasma membrane // traceable author statement///0005887 // integral component of plasma membra…	0001965 // G-protein alpha-subunit binding // inferred from electronic annotation///0004871 // signal transducer activity // inferred from electronic annotation///0004930 // G-protein coupled receptor activity // inferred from electronic annotation///0004935 // adrenergic receptor activity // inferred from electronic annotation///0004941 // beta2-adrenergic receptor activity // inferred from dire…	chr5:148204807-148208254 (+) // 92.93 // q32
215411_s_at	0.033504352	0.0026717985	down	1.3581004	-1.3581004	-0.44159016	TRAF3IP2	10758	0001783 // B cell apoptotic process // inferred from electronic annotation///0002230 // positive regulation of defense response to virus by host // inferred from direct assay///0006959 // humoral immune response // inferred from electronic annotation///0035556 // intracellular signal transduction // non-traceable author statement///0043123 // positive regulation of I-kappaB kinase/NF-kappaB signa…	0005622 // intracellular // non-traceable author statement///0005623 // cell // inferred from electronic annotation	0005515 // protein binding // inferred from physical interaction	chr6:111880142-111888466 (-) // 99.65 // q21
203450_at	0.0495594	0.0046689603	down	1.3603874	-1.3603874	-0.4440176	CBY1	25776	0008104 // protein localization // inferred from mutant phenotype///0030154 // cell differentiation // inferred from electronic annotation///0030178 // negative regulation of Wnt signaling pathway // inferred from direct assay///0042384 // cilium assembly // inferred from electronic annotation///0045444 // fat cell differentiation // inferred from sequence or structural similarity///0045892 // ne…	0005634 // nucleus // inferred from direct assay///0005654 // nucleoplasm // traceable author statement///0005794 // Golgi apparatus // inferred from electronic annotation///0005802 // trans-Golgi network // inferred from direct assay///0005829 // cytosol // traceable author statement///0016607 // nuclear speck // inferred from electronic annotation///0036064 // ciliary basal body // inferred fro…	0005515 // protein binding // inferred from physical interaction///0008013 // beta-catenin binding // inferred from direct assay///0008013 // beta-catenin binding // inferred from physical interaction///0042802 // identical protein binding // inferred from physical interaction	chr22:39052678-39069856 (+) // 100.0 // q13.1
202793_at	0.029019967	0.0020827728	down	1.385195	-1.385195	-0.4700891	LPCAT3	10162	0006629 // lipid metabolic process // inferred from electronic annotation///0006644 // phospholipid metabolic process // traceable author statement///0008152 // metabolic process // inferred from electronic annotation///0008654 // phospholipid biosynthetic process // inferred from electronic annotation///0036150 // phosphatidylserine acyl-chain remodeling // traceable author statement///0036151 /…	0005783 // endoplasmic reticulum // inferred from electronic annotation///0005789 // endoplasmic reticulum membrane // traceable author statement///0016020 // membrane // inferred from direct assay///0016021 // integral component of membrane // inferred from electronic annotation	0016740 // transferase activity // inferred from electronic annotation///0016746 // transferase activity, transferring acyl groups // inferred from electronic annotation///0016747 // transferase activity, transferring acyl groups other than amino-acyl groups // inferred from electronic annotation///0047184 // 1-acylglycerophosphocholine O-acyltransferase activity // inferred from mutant phenotype	chr12:7085485-7092663 (-) // 84.43 // p13.31
214045_at	0.024695205	0.0015552064	down	1.4055876	-1.4055876	-0.49117333	LIAS	11019	0001843 // neural tube closure // inferred from electronic annotation///0006954 // inflammatory response // inferred from sequence or structural similarity///0006979 // response to oxidative stress // inferred from sequence or structural similarity///0009107 // lipoate biosynthetic process // not recorded///0009107 // lipoate biosynthetic process // inferred from sequence or structural similarity…	0005739 // mitochondrion // not recorded///0005739 // mitochondrion // inferred from sequence or structural similarity	0003824 // catalytic activity // inferred from electronic annotation///0016740 // transferase activity // inferred from electronic annotation///0016783 // sulfurtransferase activity // inferred from electronic annotation///0016992 // lipoate synthase activity // not recorded///0016992 // lipoate synthase activity // inferred from sequence or structural similarity///0046872 // metal ion binding //…	chr4:39460675-39479269 (+) // 81.19 // p14
219132_at	0.018610168	0.0010091638	down	1.4178468	-1.4178468	-0.5037016	PELI2	57161	0001934 // positive regulation of protein phosphorylation // inferred from direct assay///0002224 // toll-like receptor signaling pathway // traceable author statement///0002755 // MyD88-dependent toll-like receptor signaling pathway // traceable author statement///0008063 // Toll signaling pathway // inferred from electronic annotation///0016567 // protein ubiquitination // inferred from electro…	0005829 // cytosol // traceable author statement///0016020 // membrane // inferred from electronic annotation///0016021 // integral component of membrane // inferred from electronic annotation	0005515 // protein binding // inferred from physical interaction///0016874 // ligase activity // inferred from electronic annotation	chr14:56585202-56768020 (+) // 98.87 // q22.3
220108_at	0.04515324	0.004041874	down	1.4331002	-1.4331002	-0.5191395	GNA14	9630	0007165 // signal transduction // traceable author statement///0007186 // G-protein coupled receptor signaling pathway // inferred from electronic annotation///0007188 // adenylate cyclase-modulating G-protein coupled receptor signaling pathway // not recorded///0007596 // blood coagulation // traceable author statement///0008152 // metabolic process // inferred from electronic annotation///00301…	0005834 // heterotrimeric G-protein complex // not recorded///0005886 // plasma membrane // traceable author statement///0070062 // extracellular exosome // inferred from direct assay	0000166 // nucleotide binding // inferred from electronic annotation///0001664 // G-protein coupled receptor binding // not recorded///0003924 // GTPase activity // not recorded///0004871 // signal transducer activity // not recorded///0005515 // protein binding // inferred from physical interaction///0005525 // GTP binding // inferred from electronic annotation///0019001 // guanyl nucleotide bin…	chr9:80038442-80262847 (-) // 99.94 // q21.2
204518_s_at	0.022456113	0.0013251614	down	1.4442209	-1.4442209	-0.53029144	PPIC	5480	0000413 // protein peptidyl-prolyl isomerization // not recorded///0006457 // protein folding // inferred from electronic annotation	0005737 // cytoplasm // inferred from electronic annotation///0070062 // extracellular exosome // inferred from direct assay	0003755 // peptidyl-prolyl cis-trans isomerase activity // not recorded///0005515 // protein binding // inferred from physical interaction///0016018 // cyclosporin A binding // inferred from direct assay///0016853 // isomerase activity // inferred from electronic annotation///0042277 // peptide binding // inferred from electronic annotation	chr5:122359489-122372401 (-) // 86.52 // q23.2
202962_at	0.031172143	0.002417657	down	1.447339	-1.447339	-0.5334029	KIF13B	23303	0006605 // protein targeting // traceable author statement///0007018 // microtubule-based movement // not recorded///0007018 // microtubule-based movement // traceable author statement///0007165 // signal transduction // non-traceable author statement///0008152 // metabolic process // inferred from electronic annotation///0042110 // T cell activation // non-traceable author statement///0050770 //…	0005737 // cytoplasm // inferred from direct assay///0005856 // cytoskeleton // inferred from electronic annotation///0005871 // kinesin complex // not recorded///0005874 // microtubule // inferred from electronic annotation///0030424 // axon // inferred from direct assay///0042995 // cell projection // inferred from electronic annotation	0000166 // nucleotide binding // inferred from electronic annotation///0003777 // microtubule motor activity // not recorded///0003777 // microtubule motor activity // non-traceable author statement///0005515 // protein binding // inferred from physical interaction///0005524 // ATP binding // inferred from electronic annotation///0008017 // microtubule binding // inferred from electronic annotati…	chr8:28924795-29120588 (-) // 99.13 // p12
213227_at	0.027443733	0.0018383362	down	1.4711503	-1.4711503	-0.5569446	PGRMC2	10424	0043401 // steroid hormone mediated signaling pathway // traceable author statement	0012505 // endomembrane system // not recorded///0016020 // membrane // inferred from direct assay///0016021 // integral component of membrane // inferred from electronic annotation	0003707 // steroid hormone receptor activity // traceable author statement///0005496 // steroid binding // inferred from electronic annotation///0008289 // lipid binding // inferred from electronic annotation///0020037 // heme binding // not recorded	chr4:129190404-129191837 (-) // 98.02 // q28.2
203845_at	0.013652695	5.879151E-4	down	1.5207574	-1.5207574	-0.60479003	KAT2B	8850	0006325 // chromatin organization // traceable author statement///0006338 // chromatin remodeling // inferred from direct assay///0006338 // chromatin remodeling // non-traceable author statement///0006351 // transcription, DNA-templated // inferred from electronic annotation///0006355 // regulation of transcription, DNA-templated // inferred from electronic annotation///0006360 // transcription …	0000123 // histone acetyltransferase complex // inferred from electronic annotation///0000125 // PCAF complex // non-traceable author statement///0000776 // kinetochore // inferred from electronic annotation///0000790 // nuclear chromatin // inferred from electronic annotation///0005634 // nucleus // inferred from sequence or structural similarity///0005654 // nucleoplasm // traceable author stat…	0000977 // RNA polymerase II regulatory region sequence-specific DNA binding // inferred from electronic annotation///0003682 // chromatin binding // inferred from electronic annotation///0003712 // transcription cofactor activity // inferred from physical interaction///0003713 // transcription coactivator activity // inferred from direct assay///0004402 // histone acetyltransferase activity // i…	chr3:20081523-20195896 (+) // 91.18 // p24.3
218191_s_at	0.016609484	7.682218E-4	down	1.5391248	-1.5391248	-0.62211025	LMBRD1	55788	0006766 // vitamin metabolic process // traceable author statement///0006767 // water-soluble vitamin metabolic process // traceable author statement///0006810 // transport // inferred from electronic annotation///0009235 // cobalamin metabolic process // traceable author statement///0016032 // viral process // inferred from electronic annotation///0038016 // insulin receptor internalization // i…	0005764 // lysosome // inferred from electronic annotation///0005765 // lysosomal membrane // traceable author statement///0005886 // plasma membrane // inferred from electronic annotation///0016020 // membrane // inferred from direct assay///0016021 // integral component of membrane // inferred from electronic annotation///0045334 // clathrin-coated endocytic vesicle // inferred from electronic …	0005158 // insulin receptor binding // inferred from electronic annotation///0031419 // cobalamin binding // inferred from electronic annotation	chr6:70385750-70506798 (-) // 99.95 // q13
213456_at	0.031172143	0.0024361005	down	1.5764809	-1.5764809	-0.65670764	SOSTDC1	25928	0007389 // pattern specification process // inferred from electronic annotation///0010454 // negative regulation of cell fate commitment // inferred from electronic annotation///0016055 // Wnt signaling pathway // inferred from electronic annotation///0030514 // negative regulation of BMP signaling pathway // inferred from electronic annotation///0031069 // hair follicle morphogenesis // inferred…	0005576 // extracellular region // inferred from electronic annotation///0005615 // extracellular space // inferred from electronic annotation	0005515 // protein binding // inferred from electronic annotation	chr7:16501168-16505474 (-) // 94.7 // p21.1
219909_at	6.1003247E-4	3.874113E-6	down	1.8491622	-1.8491622	-0.88687176	MMP28	79148	0006508 // proteolysis // inferred from electronic annotation///0010760 // negative regulation of macrophage chemotaxis // inferred from electronic annotation	0005576 // extracellular region // inferred from electronic annotation///0005578 // proteinaceous extracellular matrix // non-traceable author statement///0005737 // cytoplasm // inferred from electronic annotation///0031012 // extracellular matrix // inferred from electronic annotation	0004222 // metalloendopeptidase activity // traceable author statement///0005509 // calcium ion binding // inferred from electronic annotation///0008233 // peptidase activity // inferred from electronic annotation///0008237 // metallopeptidase activity // inferred from electronic annotation///0008270 // zinc ion binding // inferred from electronic annotation///0016787 // hydrolase activity // inf…	chr17:34092892-34122637 (-) // 98.39 // q12
205979_at	0.042375337	0.003649222	down	1.8992081	-1.8992081	-0.92539793	SCGB2A1	4246	0030521 // androgen receptor signaling pathway // inferred from direct assay	0005615 // extracellular space // inferred from direct assay	0046982 // protein heterodimerization activity // inferred from direct assay	chr11:61976139-61981408 (+) // 100.0 // q12.3
209687_at	0.0075055575	2.2744114E-4	down	3.635262	-3.635262	-1.8620594	CXCL12	6387	0001569 // patterning of blood vessels // inferred from electronic annotation///0001666 // response to hypoxia // inferred from electronic annotation///0001667 // ameboidal-type cell migration // inferred from electronic annotation///0001764 // neuron migration // inferred from electronic annotation///0001938 // positive regulation of endothelial cell proliferation // inferred from electronic ann…	0005576 // extracellular region // traceable author statement///0005615 // extracellular space // inferred from electronic annotation///0005886 // plasma membrane // inferred from electronic annotation///0009897 // external side of plasma membrane // not recorded///0070062 // extracellular exosome // inferred from direct assay	0005102 // receptor binding // traceable author statement///0005125 // cytokine activity // inferred from electronic annotation///0008009 // chemokine activity // inferred from direct assay///0008009 // chemokine activity // traceable author statement///0008083 // growth factor activity // inferred from electronic annotation///0042056 // chemoattractant activity // not recorded///0042379 // chemo…	chr10:44872580-44880557 (-) // 81.46 // q11.21
214598_at	0.008905099	3.4086502E-4	down	4.2996497	-4.2996497	-2.1042192	CLDN8	9073	0016338 // calcium-independent cell-cell adhesion via plasma membrane cell-adhesion molecules // inferred from sequence or structural similarity	0005783 // endoplasmic reticulum // inferred from direct assay///0005886 // plasma membrane // inferred from direct assay///0005923 // bicellular tight junction // inferred from sequence or structural similarity///0016020 // membrane // inferred from electronic annotation///0016021 // integral component of membrane // inferred from electronic annotation///0016323 // basolateral plasma membrane //…	0005198 // structural molecule activity // inferred from electronic annotation///0005515 // protein binding // inferred from physical interaction///0042802 // identical protein binding // inferred from sequence or structural similarity	chr21:31586328-31588391 (-) // 99.23 // q22.11
