# Supplementary material for: Histaminergic System and Inflammation-Related Genes in Normal Large Intestine and Adenocarcinoma Tissues: Transcriptional Profiles and Relations
Source: Int J Mol Sci. 2023 Mar 3;24(5):4913. doi: 10.3390/ijms24054913 (PMC10002554; doi:10.3390/ijms24054913)
Supplement: Supplementary file 1 [file ijms-24-04913-s001.zip › Table S3. C.xlsx]

## Sheet: Table S3. C
Probe Set ID	p	FC ([HCS] vs [Control])	Log FC ([HCS] vs [Control])	FC (abs) ([HCS] vs [Control])	Regulation ([HCS] vs [Control])	FC ([LCS] vs [Control])	Log FC ([LCS] vs [Control])	FC (abs) ([LCS] vs [Control])	Regulation ([LCS] vs [Control])	Gene Symbol	Entrez Gene	Gene Ontology Biological Process	Gene Ontology Cellular Component	Gene Ontology Molecular Function	Alignments
203332_s_at	2.2620145E-5	2.1811984	1.125121	2.1811984	up	1.5959842	0.67444634	1.5959842	up	INPP5D	3635	0002376 // immune system process // inferred from electronic annotation///0006470 // protein dephosphorylation // inferred from electronic annotation///0006644 // phospholipid metabolic process // traceable author statement///0006661 // phosphatidylinositol biosynthetic process // traceable author statement///0006796 // phosphate-containing compound metabolic process // traceable author statement…	0005737 // cytoplasm // inferred from electronic annotation///0005829 // cytosol // traceable author statement///0016020 // membrane // inferred from electronic annotation	0004445 // inositol-polyphosphate 5-phosphatase activity // inferred from electronic annotation///0005515 // protein binding // inferred from physical interaction///0016787 // hydrolase activity // inferred from electronic annotation///0017124 // SH3 domain binding // inferred from electronic annotation///0034594 // phosphatidylinositol trisphosphate phosphatase activity // inferred from electron…	chr2:233925070-234116549 (+) // 95.94 // q37.1
205349_at	0.0014568068	1.6005306	0.6785503	1.6005306	up	1.2493525	0.32118052	1.2493525	up	GNA15	2769	0007165 // signal transduction // inferred from electronic annotation///0007186 // G-protein coupled receptor signaling pathway // inferred from electronic annotation///0007188 // adenylate cyclase-modulating G-protein coupled receptor signaling pathway // not recorded///0007200 // phospholipase C-activating G-protein coupled receptor signaling pathway // inferred from electronic annotation///000…	0005829 // cytosol // inferred from genetic interaction///0005834 // heterotrimeric G-protein complex // non-traceable author statement///0005886 // plasma membrane // traceable author statement	0000166 // nucleotide binding // inferred from electronic annotation///0001664 // G-protein coupled receptor binding // not recorded///0003924 // GTPase activity // not recorded///0004871 // signal transducer activity // inferred from genetic interaction///0005525 // GTP binding // inferred from electronic annotation///0019001 // guanyl nucleotide binding // inferred from electronic annotation///…	chr19:3136229-3163741 (+) // 99.9 // p13.3
202626_s_at	0.004139974	1.4915242	0.5767874	1.4915242	up	1.8216166	0.86521935	1.8216166	up	LYN	4067	0001782 // B cell homeostasis // inferred from sequence or structural similarity///0001817 // regulation of cytokine production // inferred from sequence or structural similarity///0001932 // regulation of protein phosphorylation // traceable author statement///0001933 // negative regulation of protein phosphorylation // inferred from sequence or structural similarity///0002223 // stimulatory C-t…	0005634 // nucleus // inferred from direct assay///0005634 // nucleus // inferred from sequence or structural similarity///0005737 // cytoplasm // inferred from sequence or structural similarity///0005758 // mitochondrial intermembrane space // inferred from electronic annotation///0005794 // Golgi apparatus // inferred from direct assay///0005829 // cytosol // traceable author statement///000588…	0000166 // nucleotide binding // inferred from electronic annotation///0004672 // protein kinase activity // inferred from electronic annotation///0004713 // protein tyrosine kinase activity // not recorded///0004713 // protein tyrosine kinase activity // inferred from direct assay///0004713 // protein tyrosine kinase activity // traceable author statement///0004715 // non-membrane spanning prote…	chr8:56792371-56923131 (+) // 98.3 // q12.1
205581_s_at	0.009748829	1.4440643	0.530135	1.4440643	up	1.0904037	0.124862276	1.0904037	up	NOS3	4846	0001525 // angiogenesis // inferred from electronic annotation///0001542 // ovulation from ovarian follicle // inferred from electronic annotation///0001701 // in utero embryonic development // inferred from electronic annotation///0001974 // blood vessel remodeling // inferred from sequence or structural similarity///0002028 // regulation of sodium ion transport // inferred from electronic annot…	0000139 // Golgi membrane // traceable author statement///0005634 // nucleus // inferred from sequence or structural similarity///0005737 // cytoplasm // inferred from direct assay///0005794 // Golgi apparatus // inferred from electronic annotation///0005829 // cytosol // not recorded///0005829 // cytosol // traceable author statement///0005856 // cytoskeleton // inferred from electronic annotati…	0003785 // actin monomer binding // inferred from physical interaction///0003958 // NADPH-hemoprotein reductase activity // not recorded///0004517 // nitric-oxide synthase activity // inferred from direct assay///0004517 // nitric-oxide synthase activity // inferred from mutant phenotype///0005506 // iron ion binding // inferred from electronic annotation///0005515 // protein binding // inferred …	chr7:150690871-150711315 (+) // 99.11 // q36.1
203331_s_at	0.012207172	1.3564415	0.4398268	1.3564415	up	1.0892212	0.123297036	1.0892212	up	INPP5D	3635	0002376 // immune system process // inferred from electronic annotation///0006470 // protein dephosphorylation // inferred from electronic annotation///0006644 // phospholipid metabolic process // traceable author statement///0006661 // phosphatidylinositol biosynthetic process // traceable author statement///0006796 // phosphate-containing compound metabolic process // traceable author statement…	0005737 // cytoplasm // inferred from electronic annotation///0005829 // cytosol // traceable author statement///0016020 // membrane // inferred from electronic annotation	0004445 // inositol-polyphosphate 5-phosphatase activity // inferred from electronic annotation///0005515 // protein binding // inferred from physical interaction///0016787 // hydrolase activity // inferred from electronic annotation///0017124 // SH3 domain binding // inferred from electronic annotation///0034594 // phosphatidylinositol trisphosphate phosphatase activity // inferred from electron…	chr2:233925066-234115616 (+) // 97.57 // q37.1
210754_s_at	0.025665762	1.3199397	0.40047207	1.3199397	up	1.6653365	0.7358137	1.6653365	up	LYN	4067	0001782 // B cell homeostasis // inferred from sequence or structural similarity///0001817 // regulation of cytokine production // inferred from sequence or structural similarity///0001932 // regulation of protein phosphorylation // traceable author statement///0001933 // negative regulation of protein phosphorylation // inferred from sequence or structural similarity///0002223 // stimulatory C-t…	0005634 // nucleus // inferred from direct assay///0005634 // nucleus // inferred from sequence or structural similarity///0005737 // cytoplasm // inferred from sequence or structural similarity///0005758 // mitochondrial intermembrane space // inferred from electronic annotation///0005794 // Golgi apparatus // inferred from direct assay///0005829 // cytosol // traceable author statement///000588…	0000166 // nucleotide binding // inferred from electronic annotation///0004672 // protein kinase activity // inferred from electronic annotation///0004713 // protein tyrosine kinase activity // not recorded///0004713 // protein tyrosine kinase activity // inferred from direct assay///0004713 // protein tyrosine kinase activity // traceable author statement///0004715 // non-membrane spanning prote…	chr8:56854412-56922687 (+) // 98.75 // q12.1
219540_at	0.024186073	1.293365	0.37112945	1.293365	up	1.2436056	0.314529	1.2436056	up	ZNF267	10308	0006351 // transcription, DNA-templated // inferred from electronic annotation///0006355 // regulation of transcription, DNA-templated // not recorded///0007275 // multicellular organismal development // traceable author statement	0005622 // intracellular // inferred from electronic annotation///0005634 // nucleus // inferred from electronic annotation	0003676 // nucleic acid binding // inferred from electronic annotation///0003677 // DNA binding // inferred from electronic annotation///0003700 // transcription factor activity, sequence-specific DNA binding // not recorded///0046872 // metal ion binding // inferred from electronic annotation	chr16:31885118-31928676 (+) // 99.6 // p11.2
202625_at	7.179242E-5	1.2325253	0.3016173	1.2325253	up	1.8004311	0.8483424	1.8004311	up	LYN	4067	0001782 // B cell homeostasis // inferred from sequence or structural similarity///0001817 // regulation of cytokine production // inferred from sequence or structural similarity///0001932 // regulation of protein phosphorylation // traceable author statement///0001933 // negative regulation of protein phosphorylation // inferred from sequence or structural similarity///0002223 // stimulatory C-t…	0005634 // nucleus // inferred from direct assay///0005634 // nucleus // inferred from sequence or structural similarity///0005737 // cytoplasm // inferred from sequence or structural similarity///0005758 // mitochondrial intermembrane space // inferred from electronic annotation///0005794 // Golgi apparatus // inferred from direct assay///0005829 // cytosol // traceable author statement///000588…	0000166 // nucleotide binding // inferred from electronic annotation///0004672 // protein kinase activity // inferred from electronic annotation///0004713 // protein tyrosine kinase activity // not recorded///0004713 // protein tyrosine kinase activity // inferred from direct assay///0004713 // protein tyrosine kinase activity // traceable author statement///0004715 // non-membrane spanning prote…	chr8:56791985-56924592 (+) // 97.41 // q12.1
212707_s_at	1.2075096E-4	1.2195259	0.2863205	1.2195259	up	-1.3095249	-0.38904345	1.3095249	down	LOC102724229///RASA4///RASA4B///RASA4CP	10156///401331///100271927///102724229	0000165 // MAPK cascade // traceable author statement///0000186 // activation of MAPKK activity // traceable author statement///0007165 // signal transduction // inferred from electronic annotation///0007173 // epidermal growth factor receptor signaling pathway // traceable author statement///0007264 // small GTPase mediated signal transduction // traceable author statement///0007265 // Ras prote…	0005622 // intracellular // inferred from electronic annotation///0005737 // cytoplasm // not recorded///0005829 // cytosol // inferred from direct assay///0005829 // cytosol // traceable author statement///0005829 // cytosol // inferred from electronic annotation///0005886 // plasma membrane // inferred from direct assay///0005886 // plasma membrane // inferred from electronic annotation///00160…	0005096 // GTPase activator activity // inferred from direct assay///0005096 // GTPase activator activity // inferred from electronic annotation///0005515 // protein binding // inferred from electronic annotation///0046872 // metal ion binding // inferred from electronic annotation	chr7:102219912-102257184 (-) // 82.89 // q22.1///chr7:102120749-102158205 (-) // 80.2 // q22.1
211624_s_at	0.00931039	1.2190257	0.28572854	1.2190257	up	1.0853246	0.118126705	1.0853246	up	DRD2	1813	0001659 // temperature homeostasis // inferred from sequence or structural similarity///0001666 // response to hypoxia // inferred from electronic annotation///0001963 // synaptic transmission, dopaminergic // not recorded///0001964 // startle response // inferred from electronic annotation///0001975 // response to amphetamine // inferred from sequence or structural similarity///0001976 // neurol…	0001669 // acrosomal vesicle // inferred from electronic annotation///0005622 // intracellular // inferred from direct assay///0005829 // cytosol // not recorded///0005829 // cytosol // inferred from direct assay///0005829 // cytosol // inferred from electronic annotation///0005886 // plasma membrane // traceable author statement///0005887 // integral component of plasma membrane // inferred by c…	0001591 // dopamine neurotransmitter receptor activity, coupled via Gi/Go // inferred from direct assay///0004871 // signal transducer activity // inferred from electronic annotation///0004930 // G-protein coupled receptor activity // inferred from electronic annotation///0004935 // adrenergic receptor activity // not recorded///0004952 // dopamine neurotransmitter receptor activity // inferred f…	chr11:113281360-113346111 (-) // 93.79 // q23.2
206590_x_at	0.026575094	1.210557	0.27567098	1.210557	up	1.0867171	0.1199764	1.0867171	up	DRD2	1813	0001659 // temperature homeostasis // inferred from sequence or structural similarity///0001666 // response to hypoxia // inferred from electronic annotation///0001963 // synaptic transmission, dopaminergic // not recorded///0001964 // startle response // inferred from electronic annotation///0001975 // response to amphetamine // inferred from sequence or structural similarity///0001976 // neurol…	0001669 // acrosomal vesicle // inferred from electronic annotation///0005622 // intracellular // inferred from direct assay///0005829 // cytosol // not recorded///0005829 // cytosol // inferred from direct assay///0005829 // cytosol // inferred from electronic annotation///0005886 // plasma membrane // traceable author statement///0005887 // integral component of plasma membrane // inferred by c…	0001591 // dopamine neurotransmitter receptor activity, coupled via Gi/Go // inferred from direct assay///0004871 // signal transducer activity // inferred from electronic annotation///0004930 // G-protein coupled receptor activity // inferred from electronic annotation///0004935 // adrenergic receptor activity // not recorded///0004952 // dopamine neurotransmitter receptor activity // inferred f…	chr11:113280331-113295406 (-) // 99.76 // q23.2
205421_at	0.04633266	1.1228417	0.16715464	1.1228417	up	1.1991767	0.2620442	1.1991767	up	SLC22A3	6581	0006810 // transport // inferred from electronic annotation///0006811 // ion transport // inferred from electronic annotation///0006855 // drug transmembrane transport // traceable author statement///0015695 // organic cation transport // inferred from direct assay///0015697 // quaternary ammonium group transport // inferred from direct assay///0015844 // monoamine transport // inferred from elec…	0005886 // plasma membrane // traceable author statement///0005887 // integral component of plasma membrane // traceable author statement///0016020 // membrane // traceable author statement///0016021 // integral component of membrane // inferred from electronic annotation	0005215 // transporter activity // inferred from electronic annotation///0005329 // dopamine transmembrane transporter activity // not recorded///0005515 // protein binding // inferred from physical interaction///0015075 // ion transmembrane transporter activity // inferred from electronic annotation///0015101 // organic cation transmembrane transporter activity // inferred from direct assay///00…	chr6:160769424-160873603 (+) // 99.0 // q25.3
212706_at	0.03230164	-1.0458671	-0.0646995	1.0458671	down	-1.6677508	-0.7379037	1.6677508	down	LOC102724229///RASA4	10156///102724229	0000165 // MAPK cascade // traceable author statement///0000186 // activation of MAPKK activity // traceable author statement///0007165 // signal transduction // inferred from electronic annotation///0007173 // epidermal growth factor receptor signaling pathway // traceable author statement///0007264 // small GTPase mediated signal transduction // traceable author statement///0007265 // Ras prote…	0005622 // intracellular // inferred from electronic annotation///0005737 // cytoplasm // not recorded///0005829 // cytosol // inferred from direct assay///0005829 // cytosol // traceable author statement///0005886 // plasma membrane // inferred from direct assay///0016020 // membrane // inferred from electronic annotation///0031235 // intrinsic component of the cytoplasmic side of the plasma mem…	0005096 // GTPase activator activity // inferred from direct assay///0005515 // protein binding // inferred from electronic annotation///0046872 // metal ion binding // inferred from electronic annotation	chr7:102219912-102257184 (-) // 82.89 // q22.1///chr7:102120749-102158205 (-) // 80.2 // q22.1
219206_x_at	0.033124767	-1.155923	-0.20904537	1.155923	down	-1.4104648	-0.49617058	1.4104648	down	TMBIM4	51643	0006915 // apoptotic process // inferred from electronic annotation///0043066 // negative regulation of apoptotic process // inferred from mutant phenotype///0050848 // regulation of calcium-mediated signaling // inferred from direct assay	0000139 // Golgi membrane // inferred from electronic annotation///0005794 // Golgi apparatus // inferred from electronic annotation///0005795 // Golgi stack // inferred from direct assay///0016020 // membrane // inferred from electronic annotation///0016021 // integral component of membrane // inferred from electronic annotation	0005515 // protein binding // inferred from physical interaction	chr12:66531191-66563764 (-) // 76.53 // q14.3
206878_at	0.0091590015	-1.2255523	-0.29343203	1.2255523	down	-1.242348	-0.31306928	1.242348	down	DAO	1610	0006551 // leucine metabolic process // inferred from electronic annotation///0006562 // proline catabolic process // inferred from direct assay///0034641 // cellular nitrogen compound metabolic process // traceable author statement///0036088 // D-serine catabolic process // inferred from direct assay///0042416 // dopamine biosynthetic process // inferred from direct assay///0044281 // small mole…	0005741 // mitochondrial outer membrane // inferred from direct assay///0005777 // peroxisome // inferred from direct assay///0005778 // peroxisomal membrane // inferred from direct assay///0005782 // peroxisomal matrix // traceable author statement///0005829 // cytosol // inferred from direct assay	0003884 // D-amino-acid oxidase activity // inferred from direct assay///0003884 // D-amino-acid oxidase activity // traceable author statement///0005102 // receptor binding // inferred from physical interaction///0005515 // protein binding // inferred from physical interaction///0016491 // oxidoreductase activity // inferred from electronic annotation///0016641 // oxidoreductase activity, acting…	chr12:109273884-109294696 (+) // 92.16 // q24.11
219314_s_at	0.0291702	-1.2470222	-0.31848708	1.2470222	down	-1.2982159	-0.37653032	1.2982159	down	ZNF219	51222	0000122 // negative regulation of transcription from RNA polymerase II promoter // inferred from direct assay///0001505 // regulation of neurotransmitter levels // inferred from electronic annotation///0006351 // transcription, DNA-templated // inferred from direct assay///0006355 // regulation of transcription, DNA-templated // inferred from mutant phenotype///0007165 // signal transduction // n…	0005634 // nucleus // inferred from direct assay///0016021 // integral component of membrane // inferred from electronic annotation	0000978 // RNA polymerase II core promoter proximal region sequence-specific DNA binding // inferred from direct assay///0001078 // transcriptional repressor activity, RNA polymerase II core promoter proximal region sequence-specific binding // inferred from direct assay///0003676 // nucleic acid binding // inferred from electronic annotation///0003677 // DNA binding // inferred from direct assay…	chr14:21558235-21566799 (-) // 89.57 // q11.2
208316_s_at	0.024624659	-1.2479322	-0.3195396	1.2479322	down	-1.1898419	-0.25076985	1.1898419	down	OCRL	4952	0001701 // in utero embryonic development // inferred from electronic annotation///0006470 // protein dephosphorylation // inferred from electronic annotation///0006629 // lipid metabolic process // non-traceable author statement///0006644 // phospholipid metabolic process // traceable author statement///0006661 // phosphatidylinositol biosynthetic process // traceable author statement///0007165 …	0001750 // photoreceptor outer segment // inferred from direct assay///0005634 // nucleus // inferred from direct assay///0005737 // cytoplasm // inferred from direct assay///0005768 // endosome // inferred from electronic annotation///0005769 // early endosome // inferred from direct assay///0005794 // Golgi apparatus // inferred from electronic annotation///0005795 // Golgi stack // traceable a…	0004439 // phosphatidylinositol-4,5-bisphosphate 5-phosphatase activity // inferred from electronic annotation///0005096 // GTPase activator activity // inferred from direct assay///0005515 // protein binding // inferred from physical interaction///0016787 // hydrolase activity // inferred from electronic annotation///0048365 // Rac GTPase binding // inferred from physical interaction///0052745 /…	chrX:128674251-128725678 (+) // 96.94 // q25
210616_s_at	0.007579291	-1.2728046	-0.34801096	1.2728046	down	-1.3665068	-0.45049262	1.3665068	down	SEC31A	22872	0002474 // antigen processing and presentation of peptide antigen via MHC class I // traceable author statement///0006810 // transport // inferred from electronic annotation///0006888 // ER to Golgi vesicle-mediated transport // non-traceable author statement///0006888 // ER to Golgi vesicle-mediated transport // traceable author statement///0015031 // protein transport // inferred from electroni…	0000139 // Golgi membrane // traceable author statement///0005737 // cytoplasm // inferred from direct assay///0005783 // endoplasmic reticulum // inferred from direct assay///0005789 // endoplasmic reticulum membrane // traceable author statement///0005829 // cytosol // traceable author statement///0012507 // ER to Golgi transport vesicle membrane // traceable author statement///0016020 // membr…	0005515 // protein binding // inferred from physical interaction///0048306 // calcium-dependent protein binding // inferred from physical interaction	chr4:83740174-83821691 (-) // 99.54 // q21.22
204763_s_at	0.035020195	-1.289082	-0.36634415	1.289082	down	-1.3308136	-0.41230857	1.3308136	down	GNAO1	2775	0006936 // muscle contraction // traceable author statement///0007165 // signal transduction // inferred from electronic annotation///0007186 // G-protein coupled receptor signaling pathway // inferred from electronic annotation///0007188 // adenylate cyclase-modulating G-protein coupled receptor signaling pathway // not recorded///0007212 // dopamine receptor signaling pathway // not recorded///…	0005622 // intracellular // inferred from electronic annotation///0005834 // heterotrimeric G-protein complex // not recorded///0005886 // plasma membrane // traceable author statement///0016020 // membrane // inferred from electronic annotation///0030425 // dendrite // inferred from electronic annotation///0043005 // neuron projection // inferred from electronic annotation///0043209 // myelin sh…	0000166 // nucleotide binding // inferred from electronic annotation///0003924 // GTPase activity // not recorded///0004871 // signal transducer activity // not recorded///0005525 // GTP binding // inferred from electronic annotation///0019001 // guanyl nucleotide binding // inferred from electronic annotation///0031683 // G-protein beta/gamma-subunit complex binding // not recorded///0031821 // …	chr16:56226147-56391150 (+) // 97.34 // q12.2
204762_s_at	0.029343236	-1.3967716	-0.48209614	1.3967716	down	-1.5032612	-0.58809566	1.5032612	down	GNAO1	2775	0006936 // muscle contraction // traceable author statement///0007165 // signal transduction // inferred from electronic annotation///0007186 // G-protein coupled receptor signaling pathway // inferred from electronic annotation///0007188 // adenylate cyclase-modulating G-protein coupled receptor signaling pathway // not recorded///0007212 // dopamine receptor signaling pathway // not recorded///…	0005622 // intracellular // inferred from electronic annotation///0005834 // heterotrimeric G-protein complex // not recorded///0005886 // plasma membrane // traceable author statement///0016020 // membrane // inferred from electronic annotation///0030425 // dendrite // inferred from electronic annotation///0043005 // neuron projection // inferred from electronic annotation///0043209 // myelin sh…	0000166 // nucleotide binding // inferred from electronic annotation///0003924 // GTPase activity // not recorded///0004871 // signal transducer activity // not recorded///0005525 // GTP binding // inferred from electronic annotation///0019001 // guanyl nucleotide binding // inferred from electronic annotation///0031683 // G-protein beta/gamma-subunit complex binding // not recorded///0031821 // …	chr16:56225428-56391355 (+) // 93.78 // q12.2
200602_at	0.04779984	-1.4186249	-0.5044931	1.4186249	down	1.0389646	0.055146486	1.0389646	up	APP	351	0001878 // response to yeast // inferred from mutant phenotype///0001967 // suckling behavior // inferred from electronic annotation///0002576 // platelet degranulation // traceable author statement///0006378 // mRNA polyadenylation // inferred from sequence or structural similarity///0006417 // regulation of translation // inferred from sequence or structural similarity///0006468 // protein phos…	0005576 // extracellular region // traceable author statement///0005615 // extracellular space // inferred from direct assay///0005641 // nuclear envelope lumen // inferred from direct assay///0005737 // cytoplasm // inferred from direct assay///0005737 // cytoplasm // inferred from sequence or structural similarity///0005768 // endosome // inferred from direct assay///0005790 // smooth endoplasm…	0003677 // DNA binding // inferred from sequence or structural similarity///0004867 // serine-type endopeptidase inhibitor activity // inferred from direct assay///0005102 // receptor binding // inferred from physical interaction///0005515 // protein binding // inferred from physical interaction///0008201 // heparin binding // inferred from electronic annotation///0008233 // peptidase activity //…	chr21:27252861-27543085 (-) // 95.14 // q21.3
212271_at	0.016015492	-1.4212135	-0.5071233	1.4212135	down	-1.2989308	-0.37732458	1.2989308	down	MAPK1	5594	0000165 // MAPK cascade // traceable author statement///0000186 // activation of MAPKK activity // traceable author statement///0000187 // activation of MAPK activity // traceable author statement///0000189 // MAPK import into nucleus // inferred from electronic annotation///0002224 // toll-like receptor signaling pathway // traceable author statement///0002755 // MyD88-dependent toll-like recept…	0005622 // intracellular // inferred from electronic annotation///0005634 // nucleus // inferred from direct assay///0005634 // nucleus // traceable author statement///0005654 // nucleoplasm // inferred from direct assay///0005654 // nucleoplasm // traceable author statement///0005737 // cytoplasm // inferred from direct assay///0005737 // cytoplasm // inferred from sequence or structural similar…	0000166 // nucleotide binding // inferred from electronic annotation///0001784 // phosphotyrosine binding // inferred from electronic annotation///0003677 // DNA binding // inferred from electronic annotation///0004672 // protein kinase activity // inferred from electronic annotation///0004674 // protein serine/threonine kinase activity // inferred from direct assay///0004707 // MAP kinase activi…	chr22:22116311-22221722 (-) // 96.48 // q11.21
221725_at	0.015005457	-1.5562856	-0.6381068	1.5562856	down	-1.4086975	-0.49436188	1.4086975	down	WASF2	10163	0001505 // regulation of neurotransmitter levels // inferred from electronic annotation///0001525 // angiogenesis // inferred from electronic annotation///0001667 // ameboidal-type cell migration // inferred from electronic annotation///0006897 // endocytosis // inferred from electronic annotation///0007186 // G-protein coupled receptor signaling pathway // inferred from electronic annotation///0…	0001726 // ruffle // inferred from electronic annotation///0005622 // intracellular // inferred from direct assay///0005737 // cytoplasm // inferred from electronic annotation///0005769 // early endosome // inferred from electronic annotation///0005829 // cytosol // traceable author statement///0005856 // cytoskeleton // inferred from electronic annotation///0005911 // cell-cell junction // infer…	0003779 // actin binding // inferred from electronic annotation///0004969 // histamine receptor activity // inferred from electronic annotation///0005515 // protein binding // inferred from physical interaction///0032403 // protein complex binding // inferred from direct assay///0032403 // protein complex binding // inferred from mutant phenotype	chr1:27730733-27816669 (-) // 95.54 // p36.11
215300_s_at	0.003336944	-1.6732563	-0.7426584	1.6732563	down	-1.4270685	-0.5130546	1.4270685	down	FMO5	2330	0017144 // drug metabolic process // not recorded///0055114 // oxidation-reduction process // not recorded	0005737 // cytoplasm // inferred from direct assay///0005783 // endoplasmic reticulum // inferred from direct assay///0005789 // endoplasmic reticulum membrane // inferred from electronic annotation///0016020 // membrane // inferred from electronic annotation///0016021 // integral component of membrane // inferred from electronic annotation///0031090 // organelle membrane // inferred from electro…	0004497 // monooxygenase activity // inferred from electronic annotation///0004499 // N,N-dimethylaniline monooxygenase activity // not recorded///0016491 // oxidoreductase activity // inferred from electronic annotation///0050660 // flavin adenine dinucleotide binding // inferred from electronic annotation///0050661 // NADP binding // inferred from electronic annotation	chr1:146679987-146697220 (-) // 82.7 // q21.1
213071_at	0.010059406	-2.0640442	-1.0454738	2.0640442	down	-3.9826932	-1.9937444	3.9826932	down	DPT	1805	0007155 // cell adhesion // inferred from electronic annotation///0008285 // negative regulation of cell proliferation // inferred from electronic annotation///0030199 // collagen fibril organization // inferred from electronic annotation	0005576 // extracellular region // inferred from electronic annotation///0005578 // proteinaceous extracellular matrix // inferred from electronic annotation///0005615 // extracellular space // inferred from direct assay///0031012 // extracellular matrix // inferred from direct assay///0031012 // extracellular matrix // inferred from sequence or structural similarity///0070062 // extracellular ex…		chr1:168664705-168698421 (-) // 96.86 // q24.2
205776_at	0.012652412	-2.3183818	-1.2131182	2.3183818	down	-1.7596475	-0.8152864	1.7596475	down	FMO5	2330	0017144 // drug metabolic process // not recorded///0055114 // oxidation-reduction process // not recorded	0005737 // cytoplasm // inferred from direct assay///0005783 // endoplasmic reticulum // inferred from direct assay///0005789 // endoplasmic reticulum membrane // inferred from electronic annotation///0016020 // membrane // inferred from electronic annotation///0016021 // integral component of membrane // inferred from electronic annotation///0031090 // organelle membrane // inferred from electro…	0004497 // monooxygenase activity // inferred from electronic annotation///0004499 // N,N-dimethylaniline monooxygenase activity // not recorded///0016491 // oxidoreductase activity // inferred from electronic annotation///0050660 // flavin adenine dinucleotide binding // inferred from electronic annotation///0050661 // NADP binding // inferred from electronic annotation	chr1:146657837-146696922 (-) // 95.74 // q21.1
207977_s_at	0.0107722655	-2.5638483	-1.3583109	2.5638483	down	-5.861828	-2.5513506	5.861828	down	DPT	1805	0007155 // cell adhesion // inferred from electronic annotation///0008285 // negative regulation of cell proliferation // inferred from electronic annotation///0030199 // collagen fibril organization // inferred from electronic annotation	0005576 // extracellular region // inferred from electronic annotation///0005578 // proteinaceous extracellular matrix // inferred from electronic annotation///0005615 // extracellular space // inferred from direct assay///0031012 // extracellular matrix // inferred from direct assay///0031012 // extracellular matrix // inferred from sequence or structural similarity///0070062 // extracellular ex…		chr1:168665747-168698418 (-) // 90.24 // q24.2
213068_at	0.0075999713	-2.6998239	-1.4328653	2.6998239	down	-5.4248996	-2.4395964	5.4248996	down	DPT	1805	0007155 // cell adhesion // inferred from electronic annotation///0008285 // negative regulation of cell proliferation // inferred from electronic annotation///0030199 // collagen fibril organization // inferred from electronic annotation	0005576 // extracellular region // inferred from electronic annotation///0005578 // proteinaceous extracellular matrix // inferred from electronic annotation///0005615 // extracellular space // inferred from direct assay///0031012 // extracellular matrix // inferred from direct assay///0031012 // extracellular matrix // inferred from sequence or structural similarity///0070062 // extracellular ex…		chr1:168664705-168698421 (-) // 96.86 // q24.2
204388_s_at	2.9699248E-8	-3.1597753	-1.659822	3.1597753	down	-2.4269254	-1.2791297	2.4269254	down	MAOA	4128	0006576 // cellular biogenic amine metabolic process // traceable author statement///0006584 // catecholamine metabolic process // inferred from electronic annotation///0006805 // xenobiotic metabolic process // traceable author statement///0007268 // synaptic transmission // traceable author statement///0007269 // neurotransmitter secretion // traceable author statement///0042135 // neurotransmi…	0005739 // mitochondrion // inferred from direct assay///0005741 // mitochondrial outer membrane // traceable author statement///0016020 // membrane // inferred from electronic annotation///0016021 // integral component of membrane // inferred from electronic annotation	0005515 // protein binding // inferred from electronic annotation///0008131 // primary amine oxidase activity // traceable author statement///0016491 // oxidoreductase activity // inferred from electronic annotation///0050660 // flavin adenine dinucleotide binding // inferred from electronic annotation///0051378 // serotonin binding // inferred from electronic annotation	chrX:43515581-43604057 (+) // 98.03 // p11.3
212741_at	1.20142E-6	-3.2237263	-1.6887293	3.2237263	down	-2.4867408	-1.3142562	2.4867408	down	MAOA	4128	0006576 // cellular biogenic amine metabolic process // traceable author statement///0006584 // catecholamine metabolic process // inferred from electronic annotation///0006805 // xenobiotic metabolic process // traceable author statement///0007268 // synaptic transmission // traceable author statement///0007269 // neurotransmitter secretion // traceable author statement///0042135 // neurotransmi…	0005739 // mitochondrion // inferred from direct assay///0005741 // mitochondrial outer membrane // traceable author statement///0016020 // membrane // inferred from electronic annotation///0016021 // integral component of membrane // inferred from electronic annotation	0005515 // protein binding // inferred from electronic annotation///0008131 // primary amine oxidase activity // traceable author statement///0016491 // oxidoreductase activity // inferred from electronic annotation///0050660 // flavin adenine dinucleotide binding // inferred from electronic annotation///0051378 // serotonin binding // inferred from electronic annotation	chrX:43603688-43606064 (+) // 98.63 // p11.3
204389_at	5.508373E-8	-3.274758	-1.7113883	3.274758	down	-2.787886	-1.4791715	2.787886	down	MAOA	4128	0006576 // cellular biogenic amine metabolic process // traceable author statement///0006584 // catecholamine metabolic process // inferred from electronic annotation///0006805 // xenobiotic metabolic process // traceable author statement///0007268 // synaptic transmission // traceable author statement///0007269 // neurotransmitter secretion // traceable author statement///0042135 // neurotransmi…	0005739 // mitochondrion // inferred from direct assay///0005741 // mitochondrial outer membrane // traceable author statement///0016020 // membrane // inferred from electronic annotation///0016021 // integral component of membrane // inferred from electronic annotation	0005515 // protein binding // inferred from electronic annotation///0008131 // primary amine oxidase activity // traceable author statement///0016491 // oxidoreductase activity // inferred from electronic annotation///0050660 // flavin adenine dinucleotide binding // inferred from electronic annotation///0051378 // serotonin binding // inferred from electronic annotation	chrX:43515581-43604057 (+) // 98.03 // p11.3
