# Supplementary material for: Histaminergic System and Inflammation-Related Genes in Normal Large Intestine and Adenocarcinoma Tissues: Transcriptional Profiles and Relations
Source: Int J Mol Sci. 2023 Mar 3;24(5):4913. doi: 10.3390/ijms24054913 (PMC10002554; doi:10.3390/ijms24054913)
Supplement: Supplementary file 1 [file ijms-24-04913-s001.zip › Table S3. D.xlsx]

## Sheet: Inflam HCS LCS Anova 53
Probe Set ID	p (Corr)	p	FC ([HCS] vs [Control])	Log FC ([HCS] vs [Control])	FC (abs) ([HCS] vs [Control])	Regulation ([HCS] vs [Control])	FC ([LCS] vs [Control])	Log FC ([LCS] vs [Control])	FC (abs) ([LCS] vs [Control])	Regulation ([LCS] vs [Control])	Gene Symbol	Entrez Gene	Gene Ontology Biological Process	Gene Ontology Cellular Component	Gene Ontology Molecular Function	Alignments
202859_x_at	0.008486111	2.436204E-4	4.5602317	2.1891072	4.5602317	up	4.1689987	2.059701	4.1689987	up	CXCL8	3576	0001525 // angiogenesis // traceable author statement///0002237 // response to molecule of bacterial origin // inferred from direct assay///0006928 // movement of cell or subcellular component // traceable author statement///0006935 // chemotaxis // traceable author statement///0006954 // inflammatory response // traceable author statement///0006955 // immune response // not recorded///0007050 //…	0005576 // extracellular region // traceable author statement///0005615 // extracellular space // inferred from electronic annotation///0005622 // intracellular // inferred from direct assay///0005622 // intracellular // traceable author statement	0005125 // cytokine activity // inferred from electronic annotation///0005153 // interleukin-8 receptor binding // inferred from physical interaction///0005515 // protein binding // inferred from physical interaction///0008009 // chemokine activity // traceable author statement	chr4:74606301-74609431 (+) // 70.71 // q13.3
203936_s_at	1.6292807E-4	7.7956014E-7	4.0499988	2.0179214	4.0499988	up	3.2445128	1.6980019	3.2445128	up	MMP9	4318	0001501 // skeletal system development // inferred from electronic annotation///0001503 // ossification // inferred from electronic annotation///0001934 // positive regulation of protein phosphorylation // inferred from mutant phenotype///0006508 // proteolysis // inferred from direct assay///0007411 // axon guidance // traceable author statement///0007566 // embryo implantation // inferred from …	0005576 // extracellular region // traceable author statement///0005578 // proteinaceous extracellular matrix // inferred from electronic annotation///0005615 // extracellular space // inferred from direct assay///0031012 // extracellular matrix // inferred from electronic annotation///0070062 // extracellular exosome // inferred from direct assay	0004175 // endopeptidase activity // inferred from direct assay///0004222 // metalloendopeptidase activity // inferred from direct assay///0005509 // calcium ion binding // inferred from electronic annotation///0005515 // protein binding // inferred from physical interaction///0005518 // collagen binding // traceable author statement///0008233 // peptidase activity // inferred from electronic ann…	chr20:44637546-44645199 (+) // 97.17 // q13.12
209774_x_at	0.0025080494	4.000079E-5	3.4892669	1.8029239	3.4892669	up	5.228991	2.3865325	5.228991	up	CXCL2	2920	0002237 // response to molecule of bacterial origin // inferred from direct assay///0002690 // positive regulation of leukocyte chemotaxis // not recorded///0006935 // chemotaxis // traceable author statement///0006954 // inflammatory response // inferred from electronic annotation///0006955 // immune response // not recorded///0007186 // G-protein coupled receptor signaling pathway // not record…	0005576 // extracellular region // traceable author statement///0005615 // extracellular space // inferred from electronic annotation	0005125 // cytokine activity // inferred from electronic annotation///0005515 // protein binding // inferred from physical interaction///0008009 // chemokine activity // inferred from electronic annotation///0045236 // CXCR chemokine receptor binding // not recorded	chr4:74962800-74964892 (-) // 95.02 // q13.3
201792_at	0.0092082685	3.2309713E-4	3.3733642	1.7541881	3.3733642	up	1.5402542	0.6231685	1.5402542	up	AEBP1	165	0000122 // negative regulation of transcription from RNA polymerase II promoter // inferred from mutant phenotype///0001501 // skeletal system development // traceable author statement///0006351 // transcription, DNA-templated // inferred from electronic annotation///0006355 // regulation of transcription, DNA-templated // inferred from electronic annotation///0006508 // proteolysis // inferred f…	0005576 // extracellular region // inferred from electronic annotation///0005615 // extracellular space // inferred from direct assay///0005634 // nucleus // inferred from electronic annotation///0005737 // cytoplasm // inferred from electronic annotation///0031012 // extracellular matrix // inferred from direct assay///0070062 // extracellular exosome // inferred from direct assay	0000977 // RNA polymerase II regulatory region sequence-specific DNA binding // inferred from direct assay///0001227 // transcriptional repressor activity, RNA polymerase II transcription regulatory region sequence-specific binding // inferred from direct assay///0001227 // transcriptional repressor activity, RNA polymerase II transcription regulatory region sequence-specific binding // inferred …	chr7:44144125-44154158 (+) // 94.84 // p13
206025_s_at	0.0038186328	7.9174206E-5	3.2793598	1.7134142	3.2793598	up	1.480289	0.5658788	1.480289	up	TNFAIP6	7130	0006954 // inflammatory response // traceable author statement///0007155 // cell adhesion // inferred from electronic annotation///0007165 // signal transduction // traceable author statement///0007267 // cell-cell signaling // traceable author statement///0030335 // positive regulation of cell migration // inferred from electronic annotation///0030728 // ovulation // inferred from electronic ann…	0005615 // extracellular space // inferred from electronic annotation	0005540 // hyaluronic acid binding // inferred from electronic annotation	chr2:152214105-152236553 (+) // 70.63 // q23.3
204470_at	0.001321066	1.0534817E-5	2.7500343	1.4594496	2.7500343	up	4.7956867	2.2617373	4.7956867	up	CXCL1	2919	0002690 // positive regulation of leukocyte chemotaxis // not recorded///0006935 // chemotaxis // traceable author statement///0006954 // inflammatory response // inferred from electronic annotation///0006955 // immune response // not recorded///0007165 // signal transduction // traceable author statement///0007186 // G-protein coupled receptor signaling pathway // traceable author statement///00…	0005576 // extracellular region // traceable author statement///0005615 // extracellular space // inferred from electronic annotation///0005622 // intracellular // traceable author statement	0005102 // receptor binding // traceable author statement///0005125 // cytokine activity // inferred from electronic annotation///0008009 // chemokine activity // inferred from electronic annotation///0008047 // enzyme activator activity // traceable author statement///0008083 // growth factor activity // inferred from electronic annotation///0045236 // CXCR chemokine receptor binding // not reco…	chr4:74735108-74736953 (+) // 100.0 // q13.3
205499_at	0.0019205952	2.7568352E-5	2.7265067	1.4470537	2.7265067	up	2.1988077	1.1367215	2.1988077	up	SRPX2	27286	0001525 // angiogenesis // inferred from electronic annotation///0007155 // cell adhesion // inferred from electronic annotation///0016337 // single organismal cell-cell adhesion // inferred from direct assay///0042325 // regulation of phosphorylation // inferred from direct assay///0048870 // cell motility // inferred from direct assay///0051965 // positive regulation of synapse assembly // infe…	0005576 // extracellular region // inferred from electronic annotation///0005615 // extracellular space // inferred from direct assay///0005737 // cytoplasm // inferred from direct assay///0009986 // cell surface // inferred from sequence or structural similarity///0030054 // cell junction // inferred from electronic annotation///0045202 // synapse // inferred from electronic annotation///0060076…	0005102 // receptor binding // inferred from physical interaction///0005515 // protein binding // inferred from physical interaction///0036458 // hepatocyte growth factor binding // inferred from direct assay///0042802 // identical protein binding // inferred from direct assay	chrX:99899224-99926292 (+) // 97.23 // q22.1
207850_at	5.825505E-4	3.7164305E-6	2.6679604	1.4157373	2.6679604	up	5.0223637	2.3283665	5.0223637	up	CXCL3	2921	0002690 // positive regulation of leukocyte chemotaxis // not recorded///0006935 // chemotaxis // inferred from electronic annotation///0006954 // inflammatory response // not recorded///0006955 // immune response // not recorded///0007186 // G-protein coupled receptor signaling pathway // not recorded///0030593 // neutrophil chemotaxis // inferred from sequence or structural similarity///0032496…	0005576 // extracellular region // traceable author statement///0005615 // extracellular space // inferred from direct assay	0005125 // cytokine activity // inferred from electronic annotation///0008009 // chemokine activity // not recorded///0008009 // chemokine activity // inferred from sequence or structural similarity///0045236 // CXCR chemokine receptor binding // not recorded	chr4:74902313-74904405 (-) // 92.86 // q13.3
209396_s_at	0.0014897282	1.6631735E-5	2.6592984	1.4110457	2.6592984	up	2.3639324	1.2411888	2.3639324	up	CHI3L1	1116	0005975 // carbohydrate metabolic process // inferred from electronic annotation///0006032 // chitin catabolic process // not recorded///0006915 // apoptotic process // inferred from electronic annotation///0006954 // inflammatory response // inferred from expression pattern///0007250 // activation of NF-kappaB-inducing kinase activity // inferred from sequence or structural similarity///0009612 …	0005576 // extracellular region // not recorded///0005578 // proteinaceous extracellular matrix // non-traceable author statement///0005615 // extracellular space // inferred from direct assay///0005737 // cytoplasm // inferred from sequence or structural similarity///0005783 // endoplasmic reticulum // inferred from sequence or structural similarity///0048471 // perinuclear region of cytoplasm /…	0004553 // hydrolase activity, hydrolyzing O-glycosyl compounds // inferred from electronic annotation///0004568 // chitinase activity // inferred from direct assay///0005201 // extracellular matrix structural constituent // non-traceable author statement///0008061 // chitin binding // inferred from direct assay///0030246 // carbohydrate binding // inferred from electronic annotation	chr1:203148056-203155822 (-) // 99.43 // q32.1
212070_at	0.0089634145	2.7161863E-4	2.5579531	1.3549898	2.5579531	up	2.841324	1.5065634	2.841324	up	ADGRG1	9289	0001525 // angiogenesis // inferred from direct assay///0007155 // cell adhesion // inferred from electronic annotation///0007165 // signal transduction // inferred from electronic annotation///0007166 // cell surface receptor signaling pathway // inferred from electronic annotation///0007186 // G-protein coupled receptor signaling pathway // inferred from electronic annotation///0007266 // Rho p…	0005576 // extracellular region // inferred from electronic annotation///0005622 // intracellular // inferred from direct assay///0005886 // plasma membrane // inferred from electronic annotation///0005887 // integral component of plasma membrane // traceable author statement///0016020 // membrane // inferred from electronic annotation///0016021 // integral component of membrane // traceable auth…	0004871 // signal transducer activity // inferred from electronic annotation///0004888 // transmembrane signaling receptor activity // inferred from electronic annotation///0004930 // G-protein coupled receptor activity // inferred from sequence or structural similarity///0005518 // collagen binding // inferred from sequence or structural similarity///0050840 // extracellular matrix binding // in…	chr16:57662637-57699071 (+) // 85.48 // q21
206026_s_at	0.0019205952	2.5033427E-5	2.3004482	1.201915	2.3004482	up	1.2973844	0.375606	1.2973844	up	TNFAIP6	7130	0006954 // inflammatory response // traceable author statement///0007155 // cell adhesion // inferred from electronic annotation///0007165 // signal transduction // traceable author statement///0007267 // cell-cell signaling // traceable author statement///0030335 // positive regulation of cell migration // inferred from electronic annotation///0030728 // ovulation // inferred from electronic ann…	0005615 // extracellular space // inferred from electronic annotation	0005540 // hyaluronic acid binding // inferred from electronic annotation	chr2:152214119-152236553 (+) // 69.45 // q23.3
209395_at	0.0025702913	4.8139784E-5	2.257518	1.1747375	2.257518	up	2.3949168	1.2599756	2.3949168	up	CHI3L1	1116	0005975 // carbohydrate metabolic process // inferred from electronic annotation///0006032 // chitin catabolic process // not recorded///0006915 // apoptotic process // inferred from electronic annotation///0006954 // inflammatory response // inferred from expression pattern///0007250 // activation of NF-kappaB-inducing kinase activity // inferred from sequence or structural similarity///0009612 …	0005576 // extracellular region // not recorded///0005578 // proteinaceous extracellular matrix // non-traceable author statement///0005615 // extracellular space // inferred from direct assay///0005737 // cytoplasm // inferred from sequence or structural similarity///0005783 // endoplasmic reticulum // inferred from sequence or structural similarity///0048471 // perinuclear region of cytoplasm /…	0004553 // hydrolase activity, hydrolyzing O-glycosyl compounds // inferred from electronic annotation///0004568 // chitinase activity // inferred from direct assay///0005201 // extracellular matrix structural constituent // non-traceable author statement///0008061 // chitin binding // inferred from direct assay///0030246 // carbohydrate binding // inferred from electronic annotation	chr1:203148056-203155822 (-) // 99.43 // q32.1
202207_at	0.0092082685	3.1251487E-4	2.166503	1.1153681	2.166503	up	1.7952523	0.84418666	1.7952523	up	ARL4C	10123	0006810 // transport // inferred from electronic annotation///0006886 // intracellular protein transport // inferred from electronic annotation///0007264 // small GTPase mediated signal transduction // inferred from electronic annotation///0008152 // metabolic process // traceable author statement///0015031 // protein transport // inferred from electronic annotation///0032456 // endocytic recycli…	0005622 // intracellular // inferred from electronic annotation///0005634 // nucleus // traceable author statement///0005737 // cytoplasm // inferred from direct assay///0005886 // plasma membrane // inferred from direct assay///0016020 // membrane // inferred from electronic annotation///0030175 // filopodium // inferred from electronic annotation///0042995 // cell projection // inferred from el…	0000166 // nucleotide binding // inferred from electronic annotation///0003924 // GTPase activity // traceable author statement///0005515 // protein binding // inferred from physical interaction///0005525 // GTP binding // inferred from electronic annotation///0043014 // alpha-tubulin binding // inferred from direct assay	chr2:235401681-235405622 (-) // 95.42 // q37.1
219257_s_at	2.1952237E-5	3.5011542E-8	2.0613713	1.0436044	2.0613713	up	1.2813625	0.35767865	1.2813625	up	SPHK1	8877	0001568 // blood vessel development // inferred from electronic annotation///0001934 // positive regulation of protein phosphorylation // inferred from electronic annotation///0001956 // positive regulation of neurotransmitter secretion // inferred from electronic annotation///0003376 // sphingosine-1-phosphate signaling pathway // inferred from mutant phenotype///0006457 // protein folding // tr…	0005634 // nucleus // inferred from electronic annotation///0005737 // cytoplasm // inferred from direct assay///0005829 // cytosol // traceable author statement///0005886 // plasma membrane // inferred from direct assay///0008021 // synaptic vesicle // inferred from electronic annotation///0016020 // membrane // inferred from electronic annotation///0030424 // axon // inferred from electronic an…	0000166 // nucleotide binding // inferred from electronic annotation///0000287 // magnesium ion binding // inferred from direct assay///0000287 // magnesium ion binding // inferred from sequence or structural similarity///0003677 // DNA binding // inferred from direct assay///0005515 // protein binding // inferred from physical interaction///0005516 // calmodulin binding // inferred from direct a…	chr17:74380745-74383941 (+) // 98.49 // q25.1
217523_at	0.029210271	0.0016771448	1.9334626	0.9511869	1.9334626	up	1.4000753	0.48550448	1.4000753	up	CD44	960	0001658 // branching involved in ureteric bud morphogenesis // inferred from electronic annotation///0002246 // wound healing involved in inflammatory response // inferred from electronic annotation///0005975 // carbohydrate metabolic process // traceable author statement///0007155 // cell adhesion // inferred from electronic annotation///0007160 // cell-matrix adhesion // non-traceable author st…	0005737 // cytoplasm // inferred from direct assay///0005794 // Golgi apparatus // inferred from direct assay///0005886 // plasma membrane // inferred from direct assay///0005886 // plasma membrane // traceable author statement///0005887 // integral component of plasma membrane // non-traceable author statement///0005925 // focal adhesion // inferred from direct assay///0009897 // external side o…	0004415 // hyalurononglucosaminidase activity // inferred from direct assay///0004896 // cytokine receptor activity // inferred from direct assay///0005515 // protein binding // inferred from physical interaction///0005518 // collagen binding // non-traceable author statement///0005540 // hyaluronic acid binding // inferred from direct assay///0005540 // hyaluronic acid binding // non-traceable a…	chr11:35218274-35218983 (+) // 99.3 // p13
221529_s_at	0.042915154	0.0034222612	1.8145514	0.8596129	1.8145514	up	-1.0383574	-0.054303125	1.0383574	down	PLVAP	83483	0000165 // MAPK cascade // inferred from direct assay///0002693 // positive regulation of cellular extravasation // inferred from mutant phenotype///0033209 // tumor necrosis factor-mediated signaling pathway // inferred from direct assay///0070528 // protein kinase C signaling // inferred from direct assay	0005737 // cytoplasm // inferred from electronic annotation///0005886 // plasma membrane // inferred from electronic annotation///0005901 // caveola // inferred from direct assay///0009986 // cell surface // inferred from direct assay///0016020 // membrane // inferred from electronic annotation///0016021 // integral component of membrane // inferred from electronic annotation///0048471 // perinuc…	0005515 // protein binding // inferred from physical interaction///0042803 // protein homodimerization activity // inferred from electronic annotation	chr19:17462264-17488140 (-) // 99.35 // p13.11
210357_s_at	0.005227539	1.2623909E-4	1.7364702	0.7961577	1.7364702	up	1.3569772	0.44039655	1.3569772	up	SMOX	54498	0006595 // polyamine metabolic process // traceable author statement///0006596 // polyamine biosynthetic process // traceable author statement///0006598 // polyamine catabolic process // inferred from direct assay///0006805 // xenobiotic metabolic process // traceable author statement///0034641 // cellular nitrogen compound metabolic process // traceable author statement///0044281 // small molecu…	0005634 // nucleus // inferred from direct assay///0005634 // nucleus // inferred from electronic annotation///0005737 // cytoplasm // inferred from direct assay///0005829 // cytosol // traceable author statement	0016491 // oxidoreductase activity // inferred from electronic annotation///0046592 // polyamine oxidase activity // inferred from direct assay///0052894 // norspermine:oxygen oxidoreductase activity // inferred from electronic annotation///0052895 // N1-acetylspermine:oxygen oxidoreductase (N1-acetylspermidine-forming) activity // inferred from electronic annotation///0052901 // spermine:oxygen …	chr20:4129507-4168368 (+) // 98.54 // p13
202206_at	0.025376085	0.0014165279	1.7232004	0.7850905	1.7232004	up	1.363979	0.44782138	1.363979	up	ARL4C	10123	0006810 // transport // inferred from electronic annotation///0006886 // intracellular protein transport // inferred from electronic annotation///0007264 // small GTPase mediated signal transduction // inferred from electronic annotation///0008152 // metabolic process // traceable author statement///0015031 // protein transport // inferred from electronic annotation///0032456 // endocytic recycli…	0005622 // intracellular // inferred from electronic annotation///0005634 // nucleus // traceable author statement///0005737 // cytoplasm // inferred from direct assay///0005886 // plasma membrane // inferred from direct assay///0016020 // membrane // inferred from electronic annotation///0030175 // filopodium // inferred from electronic annotation///0042995 // cell projection // inferred from el…	0000166 // nucleotide binding // inferred from electronic annotation///0003924 // GTPase activity // traceable author statement///0005515 // protein binding // inferred from physical interaction///0005525 // GTP binding // inferred from electronic annotation///0043014 // alpha-tubulin binding // inferred from direct assay	chr2:235401681-235405622 (-) // 95.42 // q37.1
205569_at	0.0025702913	4.919218E-5	1.7225989	0.7845868	1.7225989	up	1.9442407	0.9592068	1.9442407	up	LAMP3	27074	0002250 // adaptive immune response // inferred from electronic annotation///0002376 // immune system process // inferred from electronic annotation///0008283 // cell proliferation // traceable author statement	0005764 // lysosome // inferred from electronic annotation///0005765 // lysosomal membrane // inferred from electronic annotation///0016020 // membrane // inferred from electronic annotation///0016021 // integral component of membrane // inferred from electronic annotation///0030659 // cytoplasmic vesicle membrane // inferred from electronic annotation///0031410 // cytoplasmic vesicle // inferred…		chr3:182840003-182880506 (-) // 83.42 // q27.1
204924_at	0.022116276	0.0010706842	1.712251	0.77589417	1.712251	up	1.1622051	0.21686468	1.1622051	up	TLR2	7097	0001666 // response to hypoxia // inferred from electronic annotation///0001774 // microglial cell activation // inferred from electronic annotation///0002224 // toll-like receptor signaling pathway // traceable author statement///0002237 // response to molecule of bacterial origin // inferred from electronic annotation///0002238 // response to molecule of fungal origin // inferred from electroni…	0005737 // cytoplasm // inferred from direct assay///0005794 // Golgi apparatus // inferred from direct assay///0005886 // plasma membrane // inferred from direct assay///0005886 // plasma membrane // traceable author statement///0005887 // integral component of plasma membrane // traceable author statement///0009897 // external side of plasma membrane // inferred from electronic annotation///000…	0001530 // lipopolysaccharide binding // inferred from direct assay///0001875 // lipopolysaccharide receptor activity // traceable author statement///0004872 // receptor activity // inferred from direct assay///0004888 // transmembrane signaling receptor activity // inferred from electronic annotation///0005515 // protein binding // inferred from physical interaction///0008329 // signaling patter…	chr4:154624037-154626530 (+) // 95.77 // q31.3
202376_at	0.042915154	0.0034052262	1.6821283	0.7502877	1.6821283	up	-1.0515885	-0.07257034	1.0515885	down	SERPINA3	12	0006953 // acute-phase response // inferred from electronic annotation///0006954 // inflammatory response // non-traceable author statement///0010466 // negative regulation of peptidase activity // inferred from electronic annotation///0010951 // negative regulation of endopeptidase activity // not recorded///0019216 // regulation of lipid metabolic process // non-traceable author statement///003…	0005576 // extracellular region // non-traceable author statement///0005615 // extracellular space // inferred from direct assay///0005622 // intracellular // non-traceable author statement///0005634 // nucleus // traceable author statement///0070062 // extracellular exosome // inferred from direct assay///0072562 // blood microparticle // inferred from direct assay	0003677 // DNA binding // traceable author statement///0004867 // serine-type endopeptidase inhibitor activity // traceable author statement///0005515 // protein binding // inferred from physical interaction///0030414 // peptidase inhibitor activity // inferred from electronic annotation	chr14:95080767-95090391 (+) // 98.11 // q32.13
202208_s_at	0.01994325	8.2699285E-4	1.6341262	0.7085194	1.6341262	up	1.326737	0.40788245	1.326737	up	ARL4C	10123	0006810 // transport // inferred from electronic annotation///0006886 // intracellular protein transport // inferred from electronic annotation///0007264 // small GTPase mediated signal transduction // inferred from electronic annotation///0008152 // metabolic process // traceable author statement///0015031 // protein transport // inferred from electronic annotation///0032456 // endocytic recycli…	0005622 // intracellular // inferred from electronic annotation///0005634 // nucleus // traceable author statement///0005737 // cytoplasm // inferred from direct assay///0005886 // plasma membrane // inferred from direct assay///0016020 // membrane // inferred from electronic annotation///0030175 // filopodium // inferred from electronic annotation///0042995 // cell projection // inferred from el…	0000166 // nucleotide binding // inferred from electronic annotation///0003924 // GTPase activity // traceable author statement///0005515 // protein binding // inferred from physical interaction///0005525 // GTP binding // inferred from electronic annotation///0043014 // alpha-tubulin binding // inferred from direct assay	chr2:235403805-235405204 (-) // 94.67 // q37.1
218368_s_at	0.01771593	6.781217E-4	1.5991793	0.6773317	1.5991793	up	1.4060304	0.49162778	1.4060304	up	TNFRSF12A	51330	0001525 // angiogenesis // inferred from electronic annotation///0006915 // apoptotic process // inferred from electronic annotation///0006931 // substrate-dependent cell migration, cell attachment to substrate // inferred from electronic annotation///0007155 // cell adhesion // inferred from electronic annotation///0007275 // multicellular organismal development // inferred from electronic annot…	0001726 // ruffle // inferred from electronic annotation///0005886 // plasma membrane // traceable author statement///0009986 // cell surface // inferred from electronic annotation///0016020 // membrane // inferred from electronic annotation///0016021 // integral component of membrane // inferred from electronic annotation	0005515 // protein binding // inferred from physical interaction	chr16:3070359-3072381 (+) // 96.69 // p13.3
217733_s_at	0.021275925	9.84054E-4	1.5116991	0.596171	1.5116991	up	1.621113	0.6969846	1.621113	up	TMSB10	9168	0007015 // actin filament organization // inferred from electronic annotation///0030036 // actin cytoskeleton organization // inferred from electronic annotation///0042989 // sequestering of actin monomers // inferred from electronic annotation	0005737 // cytoplasm // inferred from electronic annotation///0005856 // cytoskeleton // inferred from electronic annotation	0003779 // actin binding // inferred from electronic annotation///0003785 // actin monomer binding // inferred from electronic annotation///0005515 // protein binding // inferred from physical interaction	chr2:85132792-85133799 (+) // 99.78 // p11.2
205130_at	0.01771593	6.7471544E-4	1.4946167	0.5797756	1.4946167	up	1.0889841	0.12298286	1.0889841	up	MOK	5891	0006468 // protein phosphorylation // inferred from electronic annotation///0007165 // signal transduction // traceable author statement///0016310 // phosphorylation // inferred from electronic annotation///0051726 // regulation of cell cycle // inferred from electronic annotation	0005737 // cytoplasm // inferred from electronic annotation	0000166 // nucleotide binding // inferred from electronic annotation///0004672 // protein kinase activity // traceable author statement///0004674 // protein serine/threonine kinase activity // traceable author statement///0004693 // cyclin-dependent protein serine/threonine kinase activity // inferred from electronic annotation///0005524 // ATP binding // inferred from electronic annotation///001…	chr14:102695178-102771531 (-) // 98.87 // q32.31
205254_x_at	0.020937229	9.349959E-4	1.4772253	0.56288993	1.4772253	up	1.380044	0.46471423	1.380044	up	TCF7	6932	0006351 // transcription, DNA-templated // inferred from electronic annotation///0006355 // regulation of transcription, DNA-templated // inferred from electronic annotation///0006355 // regulation of transcription, DNA-templated // ---///0006357 // regulation of transcription from RNA polymerase II promoter // not recorded///0006955 // immune response // traceable author statement///0007420 // b…	0005634 // nucleus // inferred from direct assay///0005654 // nucleoplasm // traceable author statement///0005667 // transcription factor complex // not recorded	0003677 // DNA binding // inferred from electronic annotation///0003682 // chromatin binding // not recorded///0003700 // transcription factor activity, sequence-specific DNA binding // not recorded///0005515 // protein binding // inferred from physical interaction///0008013 // beta-catenin binding // inferred from direct assay///0043565 // sequence-specific DNA binding // not recorded///0044212 …	chr5:133451315-133483919 (+) // 89.28 // q31.1
206513_at	0.04695664	0.0038943307	1.4723248	0.558096	1.4723248	up	1.1226792	0.16694584	1.1226792	up	AIM2	9447	0002218 // activation of innate immune response // inferred from direct assay///0002230 // positive regulation of defense response to virus by host // inferred from sequence or structural similarity///0002376 // immune system process // inferred from electronic annotation///0006915 // apoptotic process // inferred from electronic annotation///0006954 // inflammatory response // inferred from elec…	0005634 // nucleus // inferred from electronic annotation///0005737 // cytoplasm // inferred from direct assay///0005829 // cytosol // traceable author statement///0097169 // AIM2 inflammasome complex // inferred from direct assay	0003677 // DNA binding // inferred from electronic annotation///0003690 // double-stranded DNA binding // inferred from direct assay///0005515 // protein binding // inferred from physical interaction///0042802 // identical protein binding // inferred from physical interaction	chr1:159032274-159046647 (-) // 94.68 // q23.1
219710_at	0.042915154	0.002955632	1.4704483	0.556256	1.4704483	up	1.4163709	0.50219905	1.4163709	up	SH3TC2	79628	0022011 // myelination in peripheral nervous system // inferred from electronic annotation///0032287 // peripheral nervous system myelin maintenance // inferred from electronic annotation///0033157 // regulation of intracellular protein transport // inferred from electronic annotation///1901184 // regulation of ERBB signaling pathway // inferred from electronic annotation	0005886 // plasma membrane // inferred from electronic annotation///0031410 // cytoplasmic vesicle // inferred from electronic annotation///0055037 // recycling endosome // inferred from electronic annotation		chr5:148383515-148387341 (-) // 80.63 // q32
219725_at	0.0074545275	2.0211638E-4	1.4581286	0.544118	1.4581286	up	1.3311193	0.41263992	1.3311193	up	TREM2	54209	0002588 // positive regulation of antigen processing and presentation of peptide antigen via MHC class II // inferred from direct assay///0006959 // humoral immune response // traceable author statement///0007411 // axon guidance // traceable author statement///0032497 // detection of lipopolysaccharide // inferred from electronic annotation///0032499 // detection of peptidoglycan // inferred fro…	0005576 // extracellular region // inferred from electronic annotation///0005886 // plasma membrane // traceable author statement///0016020 // membrane // inferred from electronic annotation///0016021 // integral component of membrane // inferred from direct assay///0043231 // intracellular membrane-bounded organelle // inferred from direct assay	0001530 // lipopolysaccharide binding // inferred from electronic annotation///0004872 // receptor activity // traceable author statement///0005515 // protein binding // inferred from electronic annotation///0042834 // peptidoglycan binding // inferred from electronic annotation///0070891 // lipoteichoic acid binding // inferred from electronic annotation///0097110 // scaffold protein binding // …	chr6:41126252-41130914 (-) // 99.52 // p21.1
214770_at	0.042915154	0.003252445	1.4507837	0.53683245	1.4507837	up	1.0126439	0.018127006	1.0126439	up	MSR1	4481	0006897 // endocytosis // inferred from electronic annotation///0006898 // receptor-mediated endocytosis // traceable author statement///0010744 // positive regulation of macrophage derived foam cell differentiation // inferred from sequence or structural similarity///0010886 // positive regulation of cholesterol storage // inferred from sequence or structural similarity///0030301 // cholesterol …	0005581 // collagen trimer // inferred from electronic annotation///0005829 // cytosol // inferred from electronic annotation///0005886 // plasma membrane // traceable author statement///0005887 // integral component of plasma membrane // traceable author statement///0016020 // membrane // inferred from electronic annotation///0016021 // integral component of membrane // inferred from electronic …	0005044 // scavenger receptor activity // inferred from electronic annotation///0005515 // protein binding // inferred from physical interaction///0030169 // low-density lipoprotein particle binding // inferred from sequence or structural similarity	chr8:15965284-16035503 (-) // 89.18 // p22
205255_x_at	0.0092082685	3.093791E-4	1.449301	0.53535724	1.449301	up	1.411566	0.49729663	1.411566	up	TCF7	6932	0006351 // transcription, DNA-templated // inferred from electronic annotation///0006355 // regulation of transcription, DNA-templated // inferred from electronic annotation///0006355 // regulation of transcription, DNA-templated // ---///0006357 // regulation of transcription from RNA polymerase II promoter // not recorded///0006955 // immune response // traceable author statement///0007420 // b…	0005634 // nucleus // inferred from direct assay///0005654 // nucleoplasm // traceable author statement///0005667 // transcription factor complex // not recorded	0003677 // DNA binding // inferred from electronic annotation///0003682 // chromatin binding // not recorded///0003700 // transcription factor activity, sequence-specific DNA binding // not recorded///0005515 // protein binding // inferred from physical interaction///0008013 // beta-catenin binding // inferred from direct assay///0043565 // sequence-specific DNA binding // not recorded///0044212 …	chr5:133451315-133483919 (+) // 89.07 // q31.1
201587_s_at	2.681975E-5	8.554944E-8	1.4332811	0.5193215	1.4332811	up	2.4059637	1.2666149	2.4059637	up	IRAK1	3654	0000187 // activation of MAPK activity // traceable author statement///0001959 // regulation of cytokine-mediated signaling pathway // inferred from mutant phenotype///0002224 // toll-like receptor signaling pathway // traceable author statement///0002376 // immune system process // inferred from electronic annotation///0002755 // MyD88-dependent toll-like receptor signaling pathway // traceable …	0005622 // intracellular // ---///0005634 // nucleus // inferred from direct assay///0005737 // cytoplasm // inferred from direct assay///0005811 // lipid particle // inferred from sequence or structural similarity///0005829 // cytosol // traceable author statement///0005886 // plasma membrane // not recorded///0005886 // plasma membrane // traceable author statement///0010008 // endosome membran…	0000166 // nucleotide binding // inferred from electronic annotation///0004672 // protein kinase activity // inferred from direct assay///0004672 // protein kinase activity // traceable author statement///0004674 // protein serine/threonine kinase activity // not recorded///0004674 // protein serine/threonine kinase activity // non-traceable author statement///0004704 // NF-kappaB-inducing kinase…	chrX:153275961-153285342 (-) // 87.8 // q28
206236_at	0.005227539	1.3339813E-4	1.421364	0.50727606	1.421364	up	1.3082652	0.387655	1.3082652	up	GPR4	2828	0007165 // signal transduction // inferred from electronic annotation///0007186 // G-protein coupled receptor signaling pathway // inferred from electronic annotation	0005886 // plasma membrane // traceable author statement///0005887 // integral component of plasma membrane // traceable author statement///0016020 // membrane // inferred from electronic annotation///0016021 // integral component of membrane // inferred from electronic annotation	0004871 // signal transducer activity // inferred from electronic annotation///0004930 // G-protein coupled receptor activity // inferred from electronic annotation	chr19:46093024-46095717 (-) // 83.68 // q13.32
211396_at	0.045126818	0.0036706026	1.3291692	0.41052467	1.3291692	up	1.2039356	0.2677583	1.2039356	up	FCGR2C	9103	0006955 // immune response // non-traceable author statement///0007165 // signal transduction // non-traceable author statement	0005737 // cytoplasm // inferred from electronic annotation///0005886 // plasma membrane // inferred from electronic annotation///0016020 // membrane // inferred from electronic annotation///0016021 // integral component of membrane // non-traceable author statement	0004888 // transmembrane signaling receptor activity // non-traceable author statement///0005515 // protein binding // inferred from physical interaction///0019864 // IgG binding // inferred from electronic annotation	chr1:161551225-161562032 (+) // 91.81 // q23.3
217507_at	0.037772506	0.002349486	1.3257937	0.40685636	1.3257937	up	1.1064976	0.14600042	1.1064976	up	SLC11A1	6556	0000060 // protein import into nucleus, translocation // inferred from electronic annotation///0001818 // negative regulation of cytokine production // inferred from sequence or structural similarity///0001819 // positive regulation of cytokine production // inferred from sequence or structural similarity///0002309 // T cell proliferation involved in immune response // inferred from sequence or s…	0005764 // lysosome // inferred from sequence or structural similarity///0005770 // late endosome // inferred from sequence or structural similarity///0005886 // plasma membrane // inferred from mutant phenotype///0005887 // integral component of plasma membrane // non-traceable author statement///0009279 // cell outer membrane // inferred from electronic annotation///0010008 // endosome membrane…	0005215 // transporter activity // inferred from electronic annotation///0005384 // manganese ion transmembrane transporter activity // inferred from sequence or structural similarity///0042803 // protein homodimerization activity // inferred from direct assay///0046915 // transition metal ion transmembrane transporter activity // inferred from genetic interaction///0051139 // metal ion:proton an…	chr2:219260269-219260758 (+) // 58.08 // q35
208578_at	0.042915154	0.0030350247	1.3229464	0.40375468	1.3229464	up	1.0504923	0.07106551	1.0504923	up	SCN10A	6336	0002027 // regulation of heart rate // inferred from mutant phenotype///0006810 // transport // inferred from electronic annotation///0006811 // ion transport // inferred from electronic annotation///0006814 // sodium ion transport // inferred from electronic annotation///0007600 // sensory perception // traceable author statement///0019228 // neuronal action potential // not recorded///0019233 /…	0001518 // voltage-gated sodium channel complex // inferred from direct assay///0005886 // plasma membrane // ---///0016020 // membrane // inferred from electronic annotation///0016021 // integral component of membrane // inferred from electronic annotation///0030424 // axon // inferred from electronic annotation///0044299 // C-fiber // inferred from electronic annotation///0070062 // extracellul…	0005216 // ion channel activity // inferred from electronic annotation///0005244 // voltage-gated ion channel activity // inferred from electronic annotation///0005248 // voltage-gated sodium channel activity // inferred from direct assay///0005272 // sodium channel activity // inferred from electronic annotation///0005515 // protein binding // inferred from electronic annotation///0044325 // ion…	chr3:38738836-38835501 (-) // 99.17 // p22.2
214467_at	0.022116276	0.0010934682	1.3178451	0.39818087	1.3178451	up	1.1202866	0.16386789	1.1202866	up	GPR65	8477	0006915 // apoptotic process // inferred from electronic annotation///0006955 // immune response // traceable author statement///0007165 // signal transduction // inferred from electronic annotation///0007186 // G-protein coupled receptor signaling pathway // inferred from direct assay///0007275 // multicellular organismal development // traceable author statement///0010447 // response to acidic …	0005886 // plasma membrane // inferred from direct assay///0005886 // plasma membrane // traceable author statement///0005887 // integral component of plasma membrane // traceable author statement///0016020 // membrane // inferred from electronic annotation///0016021 // integral component of membrane // inferred from electronic annotation	0004871 // signal transducer activity // inferred from electronic annotation///0004930 // G-protein coupled receptor activity // inferred from direct assay	chr14:88477191-88478419 (+) // 91.3 // q31.3
210369_at	0.02317876	0.001182967	1.3077185	0.387052	1.3077185	up	1.0197095	0.028158084	1.0197095	up	SWAP70	23075	0007204 // positive regulation of cytosolic calcium ion concentration // inferred from electronic annotation///0008064 // regulation of actin polymerization or depolymerization // inferred from electronic annotation///0016444 // somatic cell DNA recombination // inferred from electronic annotation///0030835 // negative regulation of actin filament depolymerization // inferred from electronic anno…	0005634 // nucleus // inferred from electronic annotation///0005737 // cytoplasm // inferred from electronic annotation///0005829 // cytosol // inferred from electronic annotation///0005886 // plasma membrane // inferred from electronic annotation///0016020 // membrane // inferred from electronic annotation///0030027 // lamellipodium // inferred from electronic annotation///0042995 // cell projec…	0003677 // DNA binding // inferred from electronic annotation///0005509 // calcium ion binding // inferred from electronic annotation///0005515 // protein binding // inferred from physical interaction///0005524 // ATP binding // inferred from electronic annotation	chr11:9685681-9763485 (+) // 94.84 // p15.4
221331_x_at	0.031670444	0.0018689098	1.3034974	0.3823877	1.3034974	up	1.2344071	0.30381817	1.2344071	up	CTLA4	1493	0002250 // adaptive immune response // inferred from electronic annotation///0002376 // immune system process // inferred from electronic annotation///0006955 // immune response // traceable author statement///0006974 // cellular response to DNA damage stimulus // inferred from mutant phenotype///0030889 // negative regulation of B cell proliferation // inferred from mutant phenotype///0031295 //…	0005794 // Golgi apparatus // inferred from direct assay///0005886 // plasma membrane // traceable author statement///0005887 // integral component of plasma membrane // traceable author statement///0009897 // external side of plasma membrane // inferred from direct assay///0016020 // membrane // inferred from electronic annotation///0016021 // integral component of membrane // inferred from elec…	0005515 // protein binding // inferred from physical interaction	chr2:204732665-204737535 (+) // 99.7 // q33.2
213769_at	0.037161253	0.0022521971	1.279222	0.3552667	1.279222	up	1.066369	0.09270679	1.066369	up	KSR1	8844	0000165 // MAPK cascade // traceable author statement///0000186 // activation of MAPKK activity // traceable author statement///0006468 // protein phosphorylation // inferred from electronic annotation///0007173 // epidermal growth factor receptor signaling pathway // traceable author statement///0007264 // small GTPase mediated signal transduction // traceable author statement///0007265 // Ras p…	0005622 // intracellular // inferred from electronic annotation///0005737 // cytoplasm // inferred from electronic annotation///0005783 // endoplasmic reticulum // inferred from direct assay///0005789 // endoplasmic reticulum membrane // inferred from electronic annotation///0005829 // cytosol // traceable author statement///0016020 // membrane // inferred from direct assay///0043234 // protein c…	0004672 // protein kinase activity // non-traceable author statement///0004697 // protein kinase C activity // inferred from electronic annotation///0005078 // MAP-kinase scaffold activity // inferred from electronic annotation///0005515 // protein binding // inferred from physical interaction///0005524 // ATP binding // inferred from electronic annotation///0008022 // protein C-terminus binding …	chr17:25909945-25949170 (+) // 96.24 // q11.2
213201_s_at	0.042915154	0.0034094122	1.2513375	0.32347098	1.2513375	up	1.0732592	0.10199854	1.0732592	up	TNNT1	7138	0003009 // skeletal muscle contraction // inferred from mutant phenotype///0006937 // regulation of muscle contraction // inferred from electronic annotation///0014883 // transition between fast and slow fiber // inferred from electronic annotation///0030049 // muscle filament sliding // traceable author statement///0031444 // slow-twitch skeletal muscle fiber contraction // inferred from electro…	0005829 // cytosol // traceable author statement///0005861 // troponin complex // inferred from direct assay///0005861 // troponin complex // inferred from mutant phenotype	0005515 // protein binding // inferred from physical interaction///0005523 // tropomyosin binding // inferred from mutant phenotype///0031014 // troponin T binding // inferred from electronic annotation	chr19:55644198-55660574 (-) // 85.04 // q13.42
204382_at	0.042915154	0.00317481	1.245388	0.3165953	1.245388	up	1.2620691	0.33579093	1.2620691	up	NAT9	26151	0006474 // N-terminal protein amino acid acetylation // not recorded///0008152 // metabolic process // inferred from electronic annotation	0043234 // protein complex // inferred from direct assay	0005515 // protein binding // inferred from physical interaction///0008080 // N-acetyltransferase activity // not recorded///0016740 // transferase activity // inferred from electronic annotation///0016746 // transferase activity, transferring acyl groups // inferred from electronic annotation	chr17:72766687-72772436 (-) // 95.07 // q25.1
213449_at	0.024114074	0.0012868637	1.1876556	0.24811652	1.1876556	up	1.4514184	0.5374634	1.4514184	up	POP1	10940	0001682 // tRNA 5'-leader removal // inferred from electronic annotation///0006396 // RNA processing // inferred from electronic annotation///0008033 // tRNA processing // not recorded///0008033 // tRNA processing // traceable author statement///0010467 // gene expression // traceable author statement///0016078 // tRNA catabolic process // inferred from direct assay///0090501 // RNA phosphodieste…	0000172 // ribonuclease MRP complex // inferred from direct assay///0005615 // extracellular space // inferred from direct assay///0005634 // nucleus // inferred from electronic annotation///0005654 // nucleoplasm // traceable author statement///0005655 // nucleolar ribonuclease P complex // inferred from direct assay///0005730 // nucleolus // inferred from electronic annotation	0000171 // ribonuclease MRP activity // inferred from direct assay///0004526 // ribonuclease P activity // inferred from direct assay///0005515 // protein binding // inferred from physical interaction///0016787 // hydrolase activity // inferred from electronic annotation///0044822 // poly(A) RNA binding // inferred from direct assay	chr8:99129542-99172063 (+) // 92.34 // q22.2
220446_s_at	0.042915154	0.0034168465	1.1087924	0.14898932	1.1087924	up	1.2102687	0.27532747	1.2102687	up	CHST4	10164	0005975 // carbohydrate metabolic process // inferred from electronic annotation///0006044 // N-acetylglucosamine metabolic process // inferred from direct assay///0006477 // protein sulfation // traceable author statement///0006790 // sulfur compound metabolic process // inferred from direct assay///0006928 // movement of cell or subcellular component // traceable author statement///0006954 // i…	0000139 // Golgi membrane // not recorded///0005794 // Golgi apparatus // inferred from electronic annotation///0005802 // trans-Golgi network // inferred from direct assay///0016020 // membrane // inferred from electronic annotation///0016021 // integral component of membrane // not recorded///0031228 // intrinsic component of Golgi membrane // non-traceable author statement	0001517 // N-acetylglucosamine 6-O-sulfotransferase activity // inferred from direct assay///0008146 // sulfotransferase activity // traceable author statement///0016740 // transferase activity // inferred from electronic annotation	chr16:71560060-71572416 (+) // 98.82 // q22.2
206170_at	0.042915154	0.0033678778	-1.2580584	-0.33119887	1.2580584	down	-1.353439	-0.4366299	1.353439	down	ADRB2	154	0001666 // response to hypoxia // inferred from electronic annotation///0001889 // liver development // inferred from electronic annotation///0001993 // regulation of systemic arterial blood pressure by norepinephrine-epinephrine // inferred from electronic annotation///0002024 // diet induced thermogenesis // inferred from electronic annotation///0002025 // vasodilation by norepinephrine-epineph…	0005634 // nucleus // inferred from electronic annotation///0005737 // cytoplasm // inferred from electronic annotation///0005764 // lysosome // traceable author statement///0005768 // endosome // inferred from electronic annotation///0005886 // plasma membrane // inferred from direct assay///0005886 // plasma membrane // traceable author statement///0005887 // integral component of plasma membra…	0001965 // G-protein alpha-subunit binding // inferred from electronic annotation///0004871 // signal transducer activity // inferred from electronic annotation///0004930 // G-protein coupled receptor activity // inferred from electronic annotation///0004935 // adrenergic receptor activity // inferred from electronic annotation///0004941 // beta2-adrenergic receptor activity // inferred from dire…	chr5:148204807-148208254 (+) // 92.93 // q32
219132_at	0.020937229	9.192148E-4	-1.2865262	-0.3634808	1.2865262	down	-1.6010047	-0.6789776	1.6010047	down	PELI2	57161	0001934 // positive regulation of protein phosphorylation // inferred from direct assay///0002224 // toll-like receptor signaling pathway // traceable author statement///0002755 // MyD88-dependent toll-like receptor signaling pathway // traceable author statement///0008063 // Toll signaling pathway // inferred from electronic annotation///0016567 // protein ubiquitination // inferred from electro…	0005829 // cytosol // traceable author statement///0016020 // membrane // inferred from electronic annotation///0016021 // integral component of membrane // inferred from electronic annotation	0005515 // protein binding // inferred from physical interaction///0016874 // ligase activity // inferred from electronic annotation	chr14:56585202-56768020 (+) // 98.87 // q22.3
201701_s_at	0.039620906	0.0025276495	-1.3099711	-0.38953498	1.3099711	down	-1.2589543	-0.33222592	1.2589543	down	PGRMC2	10424	0043401 // steroid hormone mediated signaling pathway // traceable author statement	0012505 // endomembrane system // not recorded///0016020 // membrane // inferred from direct assay///0016021 // integral component of membrane // inferred from electronic annotation	0003707 // steroid hormone receptor activity // traceable author statement///0005496 // steroid binding // inferred from electronic annotation///0008289 // lipid binding // inferred from electronic annotation///0020037 // heme binding // not recorded	chr4:129191298-129208948 (-) // 88.63 // q28.2
203845_at	0.019560618	7.79929E-4	-1.3804663	-0.46515572	1.3804663	down	-1.7163372	-0.779333	1.7163372	down	KAT2B	8850	0006325 // chromatin organization // traceable author statement///0006338 // chromatin remodeling // inferred from direct assay///0006338 // chromatin remodeling // non-traceable author statement///0006351 // transcription, DNA-templated // inferred from electronic annotation///0006355 // regulation of transcription, DNA-templated // inferred from electronic annotation///0006360 // transcription …	0000123 // histone acetyltransferase complex // inferred from electronic annotation///0000125 // PCAF complex // non-traceable author statement///0000776 // kinetochore // inferred from electronic annotation///0000790 // nuclear chromatin // inferred from electronic annotation///0005634 // nucleus // inferred from sequence or structural similarity///0005654 // nucleoplasm // traceable author stat…	0000977 // RNA polymerase II regulatory region sequence-specific DNA binding // inferred from electronic annotation///0003682 // chromatin binding // inferred from electronic annotation///0003712 // transcription cofactor activity // inferred from physical interaction///0003713 // transcription coactivator activity // inferred from direct assay///0004402 // histone acetyltransferase activity // i…	chr3:20081523-20195896 (+) // 91.18 // p24.3
204518_s_at	0.048287187	0.004081692	-1.4063863	-0.49199286	1.4063863	down	-1.4929489	-0.57816476	1.4929489	down	PPIC	5480	0000413 // protein peptidyl-prolyl isomerization // not recorded///0006457 // protein folding // inferred from electronic annotation	0005737 // cytoplasm // inferred from electronic annotation///0070062 // extracellular exosome // inferred from direct assay	0003755 // peptidyl-prolyl cis-trans isomerase activity // not recorded///0005515 // protein binding // inferred from physical interaction///0016018 // cyclosporin A binding // inferred from direct assay///0016853 // isomerase activity // inferred from electronic annotation///0042277 // peptide binding // inferred from electronic annotation	chr5:122359489-122372401 (-) // 86.52 // q23.2
218191_s_at	0.04171662	0.002727881	-1.5783228	-0.6583923	1.5783228	down	-1.4914937	-0.57675785	1.4914937	down	LMBRD1	55788	0006766 // vitamin metabolic process // traceable author statement///0006767 // water-soluble vitamin metabolic process // traceable author statement///0006810 // transport // inferred from electronic annotation///0009235 // cobalamin metabolic process // traceable author statement///0016032 // viral process // inferred from electronic annotation///0038016 // insulin receptor internalization // i…	0005764 // lysosome // inferred from electronic annotation///0005765 // lysosomal membrane // traceable author statement///0005886 // plasma membrane // inferred from electronic annotation///0016020 // membrane // inferred from direct assay///0016021 // integral component of membrane // inferred from electronic annotation///0045334 // clathrin-coated endocytic vesicle // inferred from electronic …	0005158 // insulin receptor binding // inferred from electronic annotation///0031419 // cobalamin binding // inferred from electronic annotation	chr6:70385750-70506798 (-) // 99.95 // q13
219909_at	0.0013884929	1.3287014E-5	-1.7576247	-0.8136271	1.7576247	down	-1.9703169	-0.9784277	1.9703169	down	MMP28	79148	0006508 // proteolysis // inferred from electronic annotation///0010760 // negative regulation of macrophage chemotaxis // inferred from electronic annotation	0005576 // extracellular region // inferred from electronic annotation///0005578 // proteinaceous extracellular matrix // non-traceable author statement///0005737 // cytoplasm // inferred from electronic annotation///0031012 // extracellular matrix // inferred from electronic annotation	0004222 // metalloendopeptidase activity // traceable author statement///0005509 // calcium ion binding // inferred from electronic annotation///0008233 // peptidase activity // inferred from electronic annotation///0008237 // metallopeptidase activity // inferred from electronic annotation///0008270 // zinc ion binding // inferred from electronic annotation///0016787 // hydrolase activity // inf…	chr17:34092892-34122637 (-) // 98.39 // q12
209687_at	0.004523422	1.01001446E-4	-2.3888922	-1.2563417	2.3888922	down	-6.14412	-2.6192064	6.14412	down	CXCL12	6387	0001569 // patterning of blood vessels // inferred from electronic annotation///0001666 // response to hypoxia // inferred from electronic annotation///0001667 // ameboidal-type cell migration // inferred from electronic annotation///0001764 // neuron migration // inferred from electronic annotation///0001938 // positive regulation of endothelial cell proliferation // inferred from electronic ann…	0005576 // extracellular region // traceable author statement///0005615 // extracellular space // inferred from electronic annotation///0005886 // plasma membrane // inferred from electronic annotation///0009897 // external side of plasma membrane // not recorded///0070062 // extracellular exosome // inferred from direct assay	0005102 // receptor binding // traceable author statement///0005125 // cytokine activity // inferred from electronic annotation///0008009 // chemokine activity // inferred from direct assay///0008009 // chemokine activity // traceable author statement///0008083 // growth factor activity // inferred from electronic annotation///0042056 // chemoattractant activity // not recorded///0042379 // chemo…	chr10:44872580-44880557 (-) // 81.46 // q11.21
214598_at	0.024114074	0.0013076212	-3.9293349	-1.9742851	3.9293349	down	-4.8120017	-2.266637	4.8120017	down	CLDN8	9073	0016338 // calcium-independent cell-cell adhesion via plasma membrane cell-adhesion molecules // inferred from sequence or structural similarity	0005783 // endoplasmic reticulum // inferred from direct assay///0005886 // plasma membrane // inferred from direct assay///0005923 // bicellular tight junction // inferred from sequence or structural similarity///0016020 // membrane // inferred from electronic annotation///0016021 // integral component of membrane // inferred from electronic annotation///0016323 // basolateral plasma membrane //…	0005198 // structural molecule activity // inferred from electronic annotation///0005515 // protein binding // inferred from physical interaction///0042802 // identical protein binding // inferred from sequence or structural similarity	chr21:31586328-31588391 (-) // 99.23 // q22.11
