# Supplementary material for: Histaminergic System and Inflammation-Related Genes in Normal Large Intestine and Adenocarcinoma Tissues: Transcriptional Profiles and Relations
Source: Int J Mol Sci. 2023 Mar 3;24(5):4913. doi: 10.3390/ijms24054913 (PMC10002554; doi:10.3390/ijms24054913)
Supplement: Supplementary file 1 [file ijms-24-04913-s001.zip › Table S3. E.xlsx]

## Sheet: table 2 uncorr hist 33
Probe Set ID	p	FC ([CS I] vs [Control])	Log FC ([CS I] vs [Control])	FC (abs) ([CS I] vs [Control])	Regulation ([CS I] vs [Control])	FC ([CS II] vs [Control])	Log FC ([CS II] vs [Control])	FC (abs) ([CS II] vs [Control])	Regulation ([CS II] vs [Control])	FC ([CS III] vs [Control])	Log FC ([CS III] vs [Control])	FC (abs) ([CS III] vs [Control])	Regulation ([CS III] vs [Control])	FC ([CS IV] vs [Control])	Log FC ([CS IV] vs [Control])	FC (abs) ([CS IV] vs [Control])	Regulation ([CS IV] vs [Control])	Gene Symbol	Entrez Gene	Gene Ontology Biological Process	Gene Ontology Cellular Component	Gene Ontology Molecular Function	Alignments
202626_s_at	0.010664588	1.6283526	0.7034132	1.6283526	up	1.9484178	0.96230304	1.9484178	up	1.4027218	0.48822883	1.4027218	up	1.6353792	0.70962524	1.6353792	up	LYN	4067	0001782 // B cell homeostasis // inferred from sequence or structural similarity///0001817 // regulation of cytokine production // inferred from sequence or structural similarity///0001932 // regulation of protein phosphorylation // traceable author statement///0001933 // negative regulation of protein phosphorylation // inferred from sequence or structural similarity///0002223 // stimulatory C-t…	0005634 // nucleus // inferred from direct assay///0005634 // nucleus // inferred from sequence or structural similarity///0005737 // cytoplasm // inferred from sequence or structural similarity///0005758 // mitochondrial intermembrane space // inferred from electronic annotation///0005794 // Golgi apparatus // inferred from direct assay///0005829 // cytosol // traceable author statement///000588…	0000166 // nucleotide binding // inferred from electronic annotation///0004672 // protein kinase activity // inferred from electronic annotation///0004713 // protein tyrosine kinase activity // not recorded///0004713 // protein tyrosine kinase activity // inferred from direct assay///0004713 // protein tyrosine kinase activity // traceable author statement///0004715 // non-membrane spanning prote…	chr8:56792371-56923131 (+) // 98.3 // q12.1
202625_at	1.727648E-4	1.5247408	0.6085641	1.5247408	up	1.9892291	0.99220943	1.9892291	up	1.1881579	0.24872665	1.1881579	up	1.302202	0.38095328	1.302202	up	LYN	4067	0001782 // B cell homeostasis // inferred from sequence or structural similarity///0001817 // regulation of cytokine production // inferred from sequence or structural similarity///0001932 // regulation of protein phosphorylation // traceable author statement///0001933 // negative regulation of protein phosphorylation // inferred from sequence or structural similarity///0002223 // stimulatory C-t…	0005634 // nucleus // inferred from direct assay///0005634 // nucleus // inferred from sequence or structural similarity///0005737 // cytoplasm // inferred from sequence or structural similarity///0005758 // mitochondrial intermembrane space // inferred from electronic annotation///0005794 // Golgi apparatus // inferred from direct assay///0005829 // cytosol // traceable author statement///000588…	0000166 // nucleotide binding // inferred from electronic annotation///0004672 // protein kinase activity // inferred from electronic annotation///0004713 // protein tyrosine kinase activity // not recorded///0004713 // protein tyrosine kinase activity // inferred from direct assay///0004713 // protein tyrosine kinase activity // traceable author statement///0004715 // non-membrane spanning prote…	chr8:56791985-56924592 (+) // 97.41 // q12.1
203332_s_at	9.896672E-5	1.4437605	0.52983147	1.4437605	up	1.6949177	0.7612152	1.6949177	up	2.1797817	1.1241837	2.1797817	up	2.1833253	1.1265271	2.1833253	up	INPP5D	3635	0002376 // immune system process // inferred from electronic annotation///0006470 // protein dephosphorylation // inferred from electronic annotation///0006644 // phospholipid metabolic process // traceable author statement///0006661 // phosphatidylinositol biosynthetic process // traceable author statement///0006796 // phosphate-containing compound metabolic process // traceable author statement…	0005737 // cytoplasm // inferred from electronic annotation///0005829 // cytosol // traceable author statement///0016020 // membrane // inferred from electronic annotation	0004445 // inositol-polyphosphate 5-phosphatase activity // inferred from electronic annotation///0005515 // protein binding // inferred from physical interaction///0016787 // hydrolase activity // inferred from electronic annotation///0017124 // SH3 domain binding // inferred from electronic annotation///0034594 // phosphatidylinositol trisphosphate phosphatase activity // inferred from electron…	chr2:233925070-234116549 (+) // 95.94 // q37.1
210784_x_at	0.04900811	1.2606412	0.33415774	1.2606412	up	1.0268342	0.038203366	1.0268342	up	1.0606786	0.08498761	1.0606786	up	1.6173601	0.69364095	1.6173601	up	LILRA6///LILRB2///LILRB3///LOC102725015///LOC102725029///LOC102725031///LOC102725034///LOC102725035	10288///11025///79168///102725015///102725029///102725031///102725034///102725035	0002250 // adaptive immune response // inferred from electronic annotation///0002376 // immune system process // inferred from electronic annotation///0002578 // negative regulation of antigen processing and presentation // inferred from direct assay///0002645 // positive regulation of tolerance induction // inferred from mutant phenotype///0002666 // positive regulation of T cell tolerance induc…	0005615 // extracellular space // inferred from direct assay///0005737 // cytoplasm // inferred from direct assay///0005886 // plasma membrane // traceable author statement///0005887 // integral component of plasma membrane // inferred by curator///0005887 // integral component of plasma membrane // traceable author statement///0009986 // cell surface // inferred from direct assay///0016020 // me…	0004872 // receptor activity // traceable author statement///0004888 // transmembrane signaling receptor activity // traceable author statement///0005515 // protein binding // inferred from physical interaction///0008157 // protein phosphatase 1 binding // inferred from physical interaction///0023029 // MHC class Ib protein binding // inferred from physical interaction///0032396 // inhibitory MHC…	chr19:54720796-54746602 (-) // 97.7 // q13.42
205349_at	0.0010193974	1.1882008	0.24877876	1.1882008	up	1.2875439	0.3646216	1.2875439	up	1.3801459	0.46482074	1.3801459	up	1.9988145	0.99914455	1.9988145	up	GNA15	2769	0007165 // signal transduction // inferred from electronic annotation///0007186 // G-protein coupled receptor signaling pathway // inferred from electronic annotation///0007188 // adenylate cyclase-modulating G-protein coupled receptor signaling pathway // not recorded///0007200 // phospholipase C-activating G-protein coupled receptor signaling pathway // inferred from electronic annotation///000…	0005829 // cytosol // inferred from genetic interaction///0005834 // heterotrimeric G-protein complex // non-traceable author statement///0005886 // plasma membrane // traceable author statement	0000166 // nucleotide binding // inferred from electronic annotation///0001664 // G-protein coupled receptor binding // not recorded///0003924 // GTPase activity // not recorded///0004871 // signal transducer activity // inferred from genetic interaction///0005525 // GTP binding // inferred from electronic annotation///0019001 // guanyl nucleotide binding // inferred from electronic annotation///…	chr19:3136229-3163741 (+) // 99.9 // p13.3
211624_s_at	0.0011785952	1.1394042	0.18827966	1.1394042	up	1.054117	0.07603493	1.054117	up	1.1048553	0.14385742	1.1048553	up	1.4127785	0.49853525	1.4127785	up	DRD2	1813	0001659 // temperature homeostasis // inferred from sequence or structural similarity///0001666 // response to hypoxia // inferred from electronic annotation///0001963 // synaptic transmission, dopaminergic // not recorded///0001964 // startle response // inferred from electronic annotation///0001975 // response to amphetamine // inferred from sequence or structural similarity///0001976 // neurol…	0001669 // acrosomal vesicle // inferred from electronic annotation///0005622 // intracellular // inferred from direct assay///0005829 // cytosol // not recorded///0005829 // cytosol // inferred from direct assay///0005829 // cytosol // inferred from electronic annotation///0005886 // plasma membrane // traceable author statement///0005887 // integral component of plasma membrane // inferred by c…	0001591 // dopamine neurotransmitter receptor activity, coupled via Gi/Go // inferred from direct assay///0004871 // signal transducer activity // inferred from electronic annotation///0004930 // G-protein coupled receptor activity // inferred from electronic annotation///0004935 // adrenergic receptor activity // not recorded///0004952 // dopamine neurotransmitter receptor activity // inferred f…	chr11:113281360-113346111 (-) // 93.79 // q23.2
210225_x_at	0.036300987	1.131828	0.17865467	1.131828	up	-1.0255623	-0.036415197	1.0255623	down	1.0991066	0.13633123	1.0991066	up	1.595909	0.6743784	1.595909	up	LILRA6///LILRB2///LILRB3///LOC102725015///LOC102725029///LOC102725031///LOC102725034///LOC102725035	10288///11025///79168///102725015///102725029///102725031///102725034///102725035	0002250 // adaptive immune response // inferred from electronic annotation///0002376 // immune system process // inferred from electronic annotation///0002578 // negative regulation of antigen processing and presentation // inferred from direct assay///0002645 // positive regulation of tolerance induction // inferred from mutant phenotype///0002666 // positive regulation of T cell tolerance induc…	0005615 // extracellular space // inferred from direct assay///0005737 // cytoplasm // inferred from direct assay///0005886 // plasma membrane // traceable author statement///0005887 // integral component of plasma membrane // inferred by curator///0005887 // integral component of plasma membrane // traceable author statement///0009986 // cell surface // inferred from direct assay///0016020 // me…	0004872 // receptor activity // traceable author statement///0004888 // transmembrane signaling receptor activity // traceable author statement///0005515 // protein binding // inferred from physical interaction///0008157 // protein phosphatase 1 binding // inferred from physical interaction///0023029 // MHC class Ib protein binding // inferred from physical interaction///0032396 // inhibitory MHC…	chr19:54720796-54746602 (-) // 97.92 // q13.42
220805_at	0.0295113	1.1112752	0.15221618	1.1112752	up	1.0080756	0.011603801	1.0080756	up	-1.1171702	-0.15984899	1.1171702	down	1.2423865	0.313114	1.2423865	up	HRH2	3274	0001696 // gastric acid secretion // inferred from electronic annotation///0001697 // histamine-induced gastric acid secretion // not recorded///0001698 // gastrin-induced gastric acid secretion // inferred from electronic annotation///0001963 // synaptic transmission, dopaminergic // not recorded///0003382 // epithelial cell morphogenesis // inferred from electronic annotation///0006955 // immun…	0005886 // plasma membrane // traceable author statement///0005887 // integral component of plasma membrane // traceable author statement///0016020 // membrane // inferred from electronic annotation///0016021 // integral component of membrane // inferred from electronic annotation	0001588 // dopamine neurotransmitter receptor activity, coupled via Gs // not recorded///0004871 // signal transducer activity // inferred from electronic annotation///0004930 // G-protein coupled receptor activity // inferred from electronic annotation///0004969 // histamine receptor activity // inferred from electronic annotation///0035240 // dopamine binding // not recorded	chr5:175109711-175111558 (+) // 89.17 // q35.2
203331_s_at	0.043284085	1.1020088	0.14013577	1.1020088	up	1.0816201	0.113193795	1.0816201	up	1.3199177	0.400448	1.3199177	up	1.4131308	0.49889493	1.4131308	up	INPP5D	3635	0002376 // immune system process // inferred from electronic annotation///0006470 // protein dephosphorylation // inferred from electronic annotation///0006644 // phospholipid metabolic process // traceable author statement///0006661 // phosphatidylinositol biosynthetic process // traceable author statement///0006796 // phosphate-containing compound metabolic process // traceable author statement…	0005737 // cytoplasm // inferred from electronic annotation///0005829 // cytosol // traceable author statement///0016020 // membrane // inferred from electronic annotation	0004445 // inositol-polyphosphate 5-phosphatase activity // inferred from electronic annotation///0005515 // protein binding // inferred from physical interaction///0016787 // hydrolase activity // inferred from electronic annotation///0017124 // SH3 domain binding // inferred from electronic annotation///0034594 // phosphatidylinositol trisphosphate phosphatase activity // inferred from electron…	chr2:233925066-234115616 (+) // 97.57 // q37.1
206899_at	0.010323743	1.0861825	0.119266495	1.0861825	up	1.0471674	0.06649217	1.0471674	up	-1.082457	-0.11430958	1.082457	down	1.2354681	0.3050578	1.2354681	up	NTSR2	23620	0007165 // signal transduction // inferred from electronic annotation///0007166 // cell surface receptor signaling pathway // traceable author statement///0007186 // G-protein coupled receptor signaling pathway // inferred from electronic annotation///0007200 // phospholipase C-activating G-protein coupled receptor signaling pathway // inferred from electronic annotation///0007218 // neuropeptide…	0005886 // plasma membrane // traceable author statement///0005887 // integral component of plasma membrane // traceable author statement///0016020 // membrane // inferred from electronic annotation///0016021 // integral component of membrane // inferred from electronic annotation	0004871 // signal transducer activity // inferred from electronic annotation///0004930 // G-protein coupled receptor activity // traceable author statement///0016492 // G-protein coupled neurotensin receptor activity // inferred from electronic annotation	chr2:11798304-11810290 (-) // 85.34 // p25.1
206590_x_at	0.0053279847	1.0828195	0.114792645	1.0828195	up	1.0890625	0.12308665	1.0890625	up	1.0860509	0.11909173	1.0860509	up	1.4245832	0.5105398	1.4245832	up	DRD2	1813	0001659 // temperature homeostasis // inferred from sequence or structural similarity///0001666 // response to hypoxia // inferred from electronic annotation///0001963 // synaptic transmission, dopaminergic // not recorded///0001964 // startle response // inferred from electronic annotation///0001975 // response to amphetamine // inferred from sequence or structural similarity///0001976 // neurol…	0001669 // acrosomal vesicle // inferred from electronic annotation///0005622 // intracellular // inferred from direct assay///0005829 // cytosol // not recorded///0005829 // cytosol // inferred from direct assay///0005829 // cytosol // inferred from electronic annotation///0005886 // plasma membrane // traceable author statement///0005887 // integral component of plasma membrane // inferred by c…	0001591 // dopamine neurotransmitter receptor activity, coupled via Gi/Go // inferred from direct assay///0004871 // signal transducer activity // inferred from electronic annotation///0004930 // G-protein coupled receptor activity // inferred from electronic annotation///0004935 // adrenergic receptor activity // not recorded///0004952 // dopamine neurotransmitter receptor activity // inferred f…	chr11:113280331-113295406 (-) // 99.76 // q23.2
220447_at	0.025321715	1.0762464	0.106008425	1.0762464	up	1.0654559	0.09147087	1.0654559	up	-1.0393133	-0.05563063	1.0393133	down	1.3987371	0.48412484	1.3987371	up	HRH3	11255	0001505 // regulation of neurotransmitter levels // inferred from electronic annotation///0007165 // signal transduction // inferred from electronic annotation///0007186 // G-protein coupled receptor signaling pathway // inferred from electronic annotation///0007187 // G-protein coupled receptor signaling pathway, coupled to cyclic nucleotide second messenger // traceable author statement///00071…	0005829 // cytosol // inferred from electronic annotation///0005886 // plasma membrane // traceable author statement///0005887 // integral component of plasma membrane // traceable author statement///0016020 // membrane // inferred from electronic annotation///0016021 // integral component of membrane // inferred from electronic annotation///0043005 // neuron projection // inferred from electroni…	0004871 // signal transducer activity // inferred from electronic annotation///0004930 // G-protein coupled receptor activity // inferred from electronic annotation///0004969 // histamine receptor activity // inferred from electronic annotation///0008144 // drug binding // inferred from electronic annotation///0051381 // histamine binding // not recorded	chr20:60790026-60795312 (-) // 93.52 // q13.33
205421_at	0.011586244	-1.0177218	-0.025343144	1.0177218	down	1.3514204	0.43447658	1.3514204	up	1.0729476	0.101579696	1.0729476	up	1.2020668	0.26551706	1.2020668	up	SLC22A3	6581	0006810 // transport // inferred from electronic annotation///0006811 // ion transport // inferred from electronic annotation///0006855 // drug transmembrane transport // traceable author statement///0015695 // organic cation transport // inferred from direct assay///0015697 // quaternary ammonium group transport // inferred from direct assay///0015844 // monoamine transport // inferred from elec…	0005886 // plasma membrane // traceable author statement///0005887 // integral component of plasma membrane // traceable author statement///0016020 // membrane // traceable author statement///0016021 // integral component of membrane // inferred from electronic annotation	0005215 // transporter activity // inferred from electronic annotation///0005329 // dopamine transmembrane transporter activity // not recorded///0005515 // protein binding // inferred from physical interaction///0015075 // ion transmembrane transporter activity // inferred from electronic annotation///0015101 // organic cation transmembrane transporter activity // inferred from direct assay///00…	chr6:160769424-160873603 (+) // 99.0 // q25.3
216938_x_at	0.00742676	-1.0268886	-0.03827976	1.0268886	down	1.083157	0.11524235	1.083157	up	1.0220771	0.031504005	1.0220771	up	1.3898151	0.47489297	1.3898151	up	DRD2	1813	0001659 // temperature homeostasis // inferred from sequence or structural similarity///0001666 // response to hypoxia // inferred from electronic annotation///0001963 // synaptic transmission, dopaminergic // not recorded///0001964 // startle response // inferred from electronic annotation///0001975 // response to amphetamine // inferred from sequence or structural similarity///0001976 // neurol…	0001669 // acrosomal vesicle // inferred from electronic annotation///0005622 // intracellular // inferred from direct assay///0005829 // cytosol // not recorded///0005829 // cytosol // inferred from direct assay///0005829 // cytosol // inferred from electronic annotation///0005886 // plasma membrane // traceable author statement///0005887 // integral component of plasma membrane // inferred by c…	0001591 // dopamine neurotransmitter receptor activity, coupled via Gi/Go // inferred from direct assay///0004871 // signal transducer activity // inferred from electronic annotation///0004930 // G-protein coupled receptor activity // inferred from electronic annotation///0004935 // adrenergic receptor activity // not recorded///0004952 // dopamine neurotransmitter receptor activity // inferred f…	chr11:113280336-113345863 (-) // 98.1 // q23.2
205624_at	0.04390318	-1.0488195	-0.06876654	1.0488195	down	-1.4441806	-0.53025115	1.4441806	down	1.1197475	0.1631734	1.1197475	up	-2.6614192	-1.4121958	2.6614192	down	CPA3	1359	0002002 // regulation of angiotensin levels in blood // inferred from electronic annotation///0002003 // angiotensin maturation // traceable author statement///0002230 // positive regulation of defense response to virus by host // inferred from mutant phenotype///0006508 // proteolysis // traceable author statement///0044267 // cellular protein metabolic process // traceable author statement///00…	0005576 // extracellular region // traceable author statement///0005615 // extracellular space // not recorded///0030133 // transport vesicle // inferred from electronic annotation///0030141 // secretory granule // non-traceable author statement///0031410 // cytoplasmic vesicle // inferred from electronic annotation	0004180 // carboxypeptidase activity // inferred from electronic annotation///0004181 // metallocarboxypeptidase activity // non-traceable author statement///0004181 // metallocarboxypeptidase activity // traceable author statement///0008233 // peptidase activity // inferred from electronic annotation///0008237 // metallopeptidase activity // inferred from electronic annotation///0008270 // zinc …	chr3:148583083-148614862 (+) // 99.88 // q24
205581_s_at	0.030142622	-1.0579146	-0.0812232	1.0579146	down	1.1879824	0.24851355	1.1879824	up	1.499691	0.5846653	1.499691	up	1.3644688	0.44833946	1.3644688	up	NOS3	4846	0001525 // angiogenesis // inferred from electronic annotation///0001542 // ovulation from ovarian follicle // inferred from electronic annotation///0001701 // in utero embryonic development // inferred from electronic annotation///0001974 // blood vessel remodeling // inferred from sequence or structural similarity///0002028 // regulation of sodium ion transport // inferred from electronic annot…	0000139 // Golgi membrane // traceable author statement///0005634 // nucleus // inferred from sequence or structural similarity///0005737 // cytoplasm // inferred from direct assay///0005794 // Golgi apparatus // inferred from electronic annotation///0005829 // cytosol // not recorded///0005829 // cytosol // traceable author statement///0005856 // cytoskeleton // inferred from electronic annotati…	0003785 // actin monomer binding // inferred from physical interaction///0003958 // NADPH-hemoprotein reductase activity // not recorded///0004517 // nitric-oxide synthase activity // inferred from direct assay///0004517 // nitric-oxide synthase activity // inferred from mutant phenotype///0005506 // iron ion binding // inferred from electronic annotation///0005515 // protein binding // inferred …	chr7:150690871-150711315 (+) // 99.11 // q36.1
206166_s_at	0.013172479	-1.0599772	-0.08403321	1.0599772	down	1.0010842	0.0015633479	1.0010842	up	-1.0688308	-0.09603362	1.0688308	down	1.2548443	0.32750836	1.2548443	up	CLCA2	9635	0006508 // proteolysis // inferred from electronic annotation///0006810 // transport // traceable author statement///0006811 // ion transport // inferred from electronic annotation///0006821 // chloride transport // inferred from electronic annotation///0007155 // cell adhesion // inferred from electronic annotation///0034220 // ion transmembrane transport // traceable author statement///0055085 …	0005576 // extracellular region // inferred from electronic annotation///0005634 // nucleus // inferred from direct assay///0005886 // plasma membrane // traceable author statement///0005887 // integral component of plasma membrane // traceable author statement///0009925 // basal plasma membrane // inferred from electronic annotation///0016020 // membrane // inferred from electronic annotation///…	0005229 // intracellular calcium activated chloride channel activity // not recorded///0005254 // chloride channel activity // traceable author statement///0008233 // peptidase activity // inferred from electronic annotation///0008237 // metallopeptidase activity // inferred from electronic annotation///0015276 // ligand-gated ion channel activity // inferred from electronic annotation///0016787 …	chr1:86889824-86921236 (+) // 99.06 // p22.3
200602_at	0.028663699	-1.1208153	-0.16454853	1.1208153	down	1.1383653	0.1869635	1.1383653	up	-1.19041	-0.25145862	1.19041	down	-1.8455424	-0.8840449	1.8455424	down	APP	351	0001878 // response to yeast // inferred from mutant phenotype///0001967 // suckling behavior // inferred from electronic annotation///0002576 // platelet degranulation // traceable author statement///0006378 // mRNA polyadenylation // inferred from sequence or structural similarity///0006417 // regulation of translation // inferred from sequence or structural similarity///0006468 // protein phos…	0005576 // extracellular region // traceable author statement///0005615 // extracellular space // inferred from direct assay///0005641 // nuclear envelope lumen // inferred from direct assay///0005737 // cytoplasm // inferred from direct assay///0005737 // cytoplasm // inferred from sequence or structural similarity///0005768 // endosome // inferred from direct assay///0005790 // smooth endoplasm…	0003677 // DNA binding // inferred from sequence or structural similarity///0004867 // serine-type endopeptidase inhibitor activity // inferred from direct assay///0005102 // receptor binding // inferred from physical interaction///0005515 // protein binding // inferred from physical interaction///0008201 // heparin binding // inferred from electronic annotation///0008233 // peptidase activity //…	chr21:27252861-27543085 (-) // 95.14 // q21.3
206878_at	0.016946238	-1.1974777	-0.25999883	1.1974777	down	-1.270073	-0.34491152	1.270073	down	-1.3147221	-0.39475787	1.3147221	down	-1.103008	-0.14144327	1.103008	down	DAO	1610	0006551 // leucine metabolic process // inferred from electronic annotation///0006562 // proline catabolic process // inferred from direct assay///0034641 // cellular nitrogen compound metabolic process // traceable author statement///0036088 // D-serine catabolic process // inferred from direct assay///0042416 // dopamine biosynthetic process // inferred from direct assay///0044281 // small mole…	0005741 // mitochondrial outer membrane // inferred from direct assay///0005777 // peroxisome // inferred from direct assay///0005778 // peroxisomal membrane // inferred from direct assay///0005782 // peroxisomal matrix // traceable author statement///0005829 // cytosol // inferred from direct assay	0003884 // D-amino-acid oxidase activity // inferred from direct assay///0003884 // D-amino-acid oxidase activity // traceable author statement///0005102 // receptor binding // inferred from physical interaction///0005515 // protein binding // inferred from physical interaction///0016491 // oxidoreductase activity // inferred from electronic annotation///0016641 // oxidoreductase activity, acting…	chr12:109273884-109294696 (+) // 92.16 // q24.11
208316_s_at	0.01378293	-1.2821952	-0.35861593	1.2821952	down	-1.1376542	-0.18606216	1.1376542	down	-1.1411604	-0.19050162	1.1411604	down	-1.4271101	-0.51309663	1.4271101	down	OCRL	4952	0001701 // in utero embryonic development // inferred from electronic annotation///0006470 // protein dephosphorylation // inferred from electronic annotation///0006629 // lipid metabolic process // non-traceable author statement///0006644 // phospholipid metabolic process // traceable author statement///0006661 // phosphatidylinositol biosynthetic process // traceable author statement///0007165 …	0001750 // photoreceptor outer segment // inferred from direct assay///0005634 // nucleus // inferred from direct assay///0005737 // cytoplasm // inferred from direct assay///0005768 // endosome // inferred from electronic annotation///0005769 // early endosome // inferred from direct assay///0005794 // Golgi apparatus // inferred from electronic annotation///0005795 // Golgi stack // traceable a…	0004439 // phosphatidylinositol-4,5-bisphosphate 5-phosphatase activity // inferred from electronic annotation///0005096 // GTPase activator activity // inferred from direct assay///0005515 // protein binding // inferred from physical interaction///0016787 // hydrolase activity // inferred from electronic annotation///0048365 // Rac GTPase binding // inferred from physical interaction///0052745 /…	chrX:128674251-128725678 (+) // 96.94 // q25
212707_s_at	3.9662432E-4	-1.2837381	-0.36035094	1.2837381	down	-1.3252449	-0.40625897	1.3252449	down	1.1127367	0.15411226	1.1127367	up	1.3992298	0.48463285	1.3992298	up	LOC102724229///RASA4///RASA4B///RASA4CP	10156///401331///100271927///102724229	0000165 // MAPK cascade // traceable author statement///0000186 // activation of MAPKK activity // traceable author statement///0007165 // signal transduction // inferred from electronic annotation///0007173 // epidermal growth factor receptor signaling pathway // traceable author statement///0007264 // small GTPase mediated signal transduction // traceable author statement///0007265 // Ras prote…	0005622 // intracellular // inferred from electronic annotation///0005737 // cytoplasm // not recorded///0005829 // cytosol // inferred from direct assay///0005829 // cytosol // traceable author statement///0005829 // cytosol // inferred from electronic annotation///0005886 // plasma membrane // inferred from direct assay///0005886 // plasma membrane // inferred from electronic annotation///00160…	0005096 // GTPase activator activity // inferred from direct assay///0005096 // GTPase activator activity // inferred from electronic annotation///0005515 // protein binding // inferred from electronic annotation///0046872 // metal ion binding // inferred from electronic annotation	chr7:102219912-102257184 (-) // 82.89 // q22.1///chr7:102120749-102158205 (-) // 80.2 // q22.1
212271_at	0.006767732	-1.4136534	-0.49942842	1.4136534	down	-1.2346159	-0.30406228	1.2346159	down	-1.2193929	-0.286163	1.2193929	down	-1.7882689	-0.8385637	1.7882689	down	MAPK1	5594	0000165 // MAPK cascade // traceable author statement///0000186 // activation of MAPKK activity // traceable author statement///0000187 // activation of MAPK activity // traceable author statement///0000189 // MAPK import into nucleus // inferred from electronic annotation///0002224 // toll-like receptor signaling pathway // traceable author statement///0002755 // MyD88-dependent toll-like recept…	0005622 // intracellular // inferred from electronic annotation///0005634 // nucleus // inferred from direct assay///0005634 // nucleus // traceable author statement///0005654 // nucleoplasm // inferred from direct assay///0005654 // nucleoplasm // traceable author statement///0005737 // cytoplasm // inferred from direct assay///0005737 // cytoplasm // inferred from sequence or structural similar…	0000166 // nucleotide binding // inferred from electronic annotation///0001784 // phosphotyrosine binding // inferred from electronic annotation///0003677 // DNA binding // inferred from electronic annotation///0004672 // protein kinase activity // inferred from electronic annotation///0004674 // protein serine/threonine kinase activity // inferred from direct assay///0004707 // MAP kinase activi…	chr22:22116311-22221722 (-) // 96.48 // q11.21
215300_s_at	0.008713257	-1.4451561	-0.5312254	1.4451561	down	-1.4163247	-0.5021521	1.4163247	down	-1.5735908	-0.6540604	1.5735908	down	-1.834714	-0.8755552	1.834714	down	FMO5	2330	0017144 // drug metabolic process // not recorded///0055114 // oxidation-reduction process // not recorded	0005737 // cytoplasm // inferred from direct assay///0005783 // endoplasmic reticulum // inferred from direct assay///0005789 // endoplasmic reticulum membrane // inferred from electronic annotation///0016020 // membrane // inferred from electronic annotation///0016021 // integral component of membrane // inferred from electronic annotation///0031090 // organelle membrane // inferred from electro…	0004497 // monooxygenase activity // inferred from electronic annotation///0004499 // N,N-dimethylaniline monooxygenase activity // not recorded///0016491 // oxidoreductase activity // inferred from electronic annotation///0050660 // flavin adenine dinucleotide binding // inferred from electronic annotation///0050661 // NADP binding // inferred from electronic annotation	chr1:146679987-146697220 (-) // 82.7 // q21.1
210616_s_at	0.0022817203	-1.454407	-0.5404311	1.454407	down	-1.3163376	-0.39652953	1.3163376	down	-1.1152679	-0.15739024	1.1152679	down	-1.5517994	-0.63394207	1.5517994	down	SEC31A	22872	0002474 // antigen processing and presentation of peptide antigen via MHC class I // traceable author statement///0006810 // transport // inferred from electronic annotation///0006888 // ER to Golgi vesicle-mediated transport // non-traceable author statement///0006888 // ER to Golgi vesicle-mediated transport // traceable author statement///0015031 // protein transport // inferred from electroni…	0000139 // Golgi membrane // traceable author statement///0005737 // cytoplasm // inferred from direct assay///0005783 // endoplasmic reticulum // inferred from direct assay///0005789 // endoplasmic reticulum membrane // traceable author statement///0005829 // cytosol // traceable author statement///0012507 // ER to Golgi transport vesicle membrane // traceable author statement///0016020 // membr…	0005515 // protein binding // inferred from physical interaction///0048306 // calcium-dependent protein binding // inferred from physical interaction	chr4:83740174-83821691 (-) // 99.54 // q21.22
212741_at	1.4281716E-7	-1.5092796	-0.5938601	1.5092796	down	-3.3554213	-1.7464939	3.3554213	down	-2.5402343	-1.3449616	2.5402343	down	-4.608766	-2.2043805	4.608766	down	MAOA	4128	0006576 // cellular biogenic amine metabolic process // traceable author statement///0006584 // catecholamine metabolic process // inferred from electronic annotation///0006805 // xenobiotic metabolic process // traceable author statement///0007268 // synaptic transmission // traceable author statement///0007269 // neurotransmitter secretion // traceable author statement///0042135 // neurotransmi…	0005739 // mitochondrion // inferred from direct assay///0005741 // mitochondrial outer membrane // traceable author statement///0016020 // membrane // inferred from electronic annotation///0016021 // integral component of membrane // inferred from electronic annotation	0005515 // protein binding // inferred from electronic annotation///0008131 // primary amine oxidase activity // traceable author statement///0016491 // oxidoreductase activity // inferred from electronic annotation///0050660 // flavin adenine dinucleotide binding // inferred from electronic annotation///0051378 // serotonin binding // inferred from electronic annotation	chrX:43603688-43606064 (+) // 98.63 // p11.3
204389_at	7.7043716E-10	-1.5928584	-0.6716181	1.5928584	down	-3.9006205	-1.9637036	3.9006205	down	-2.546944	-1.3487672	2.546944	down	-4.774403	-2.2553203	4.774403	down	MAOA	4128	0006576 // cellular biogenic amine metabolic process // traceable author statement///0006584 // catecholamine metabolic process // inferred from electronic annotation///0006805 // xenobiotic metabolic process // traceable author statement///0007268 // synaptic transmission // traceable author statement///0007269 // neurotransmitter secretion // traceable author statement///0042135 // neurotransmi…	0005739 // mitochondrion // inferred from direct assay///0005741 // mitochondrial outer membrane // traceable author statement///0016020 // membrane // inferred from electronic annotation///0016021 // integral component of membrane // inferred from electronic annotation	0005515 // protein binding // inferred from electronic annotation///0008131 // primary amine oxidase activity // traceable author statement///0016491 // oxidoreductase activity // inferred from electronic annotation///0050660 // flavin adenine dinucleotide binding // inferred from electronic annotation///0051378 // serotonin binding // inferred from electronic annotation	chrX:43515581-43604057 (+) // 98.03 // p11.3
204388_s_at	5.1399445E-9	-1.5987899	-0.6769804	1.5987899	down	-3.1175642	-1.6404192	3.1175642	down	-2.6650615	-1.4141688	2.6650615	down	-4.0792437	-2.0283017	4.0792437	down	MAOA	4128	0006576 // cellular biogenic amine metabolic process // traceable author statement///0006584 // catecholamine metabolic process // inferred from electronic annotation///0006805 // xenobiotic metabolic process // traceable author statement///0007268 // synaptic transmission // traceable author statement///0007269 // neurotransmitter secretion // traceable author statement///0042135 // neurotransmi…	0005739 // mitochondrion // inferred from direct assay///0005741 // mitochondrial outer membrane // traceable author statement///0016020 // membrane // inferred from electronic annotation///0016021 // integral component of membrane // inferred from electronic annotation	0005515 // protein binding // inferred from electronic annotation///0008131 // primary amine oxidase activity // traceable author statement///0016491 // oxidoreductase activity // inferred from electronic annotation///0050660 // flavin adenine dinucleotide binding // inferred from electronic annotation///0051378 // serotonin binding // inferred from electronic annotation	chrX:43515581-43604057 (+) // 98.03 // p11.3
205776_at	0.03152586	-1.6934394	-0.75995636	1.6934394	down	-1.8006083	-0.8484844	1.8006083	down	-2.041243	-1.029448	2.041243	down	-2.8062108	-1.4886234	2.8062108	down	FMO5	2330	0017144 // drug metabolic process // not recorded///0055114 // oxidation-reduction process // not recorded	0005737 // cytoplasm // inferred from direct assay///0005783 // endoplasmic reticulum // inferred from direct assay///0005789 // endoplasmic reticulum membrane // inferred from electronic annotation///0016020 // membrane // inferred from electronic annotation///0016021 // integral component of membrane // inferred from electronic annotation///0031090 // organelle membrane // inferred from electro…	0004497 // monooxygenase activity // inferred from electronic annotation///0004499 // N,N-dimethylaniline monooxygenase activity // not recorded///0016491 // oxidoreductase activity // inferred from electronic annotation///0050660 // flavin adenine dinucleotide binding // inferred from electronic annotation///0050661 // NADP binding // inferred from electronic annotation	chr1:146657837-146696922 (-) // 95.74 // q21.1
221725_at	5.236204E-4	-1.7364218	-0.7961174	1.7364218	down	-1.2425541	-0.31330857	1.2425541	down	-1.1819296	-0.24114409	1.1819296	down	-2.3514504	-1.2335509	2.3514504	down	WASF2	10163	0001505 // regulation of neurotransmitter levels // inferred from electronic annotation///0001525 // angiogenesis // inferred from electronic annotation///0001667 // ameboidal-type cell migration // inferred from electronic annotation///0006897 // endocytosis // inferred from electronic annotation///0007186 // G-protein coupled receptor signaling pathway // inferred from electronic annotation///0…	0001726 // ruffle // inferred from electronic annotation///0005622 // intracellular // inferred from direct assay///0005737 // cytoplasm // inferred from electronic annotation///0005769 // early endosome // inferred from electronic annotation///0005829 // cytosol // traceable author statement///0005856 // cytoskeleton // inferred from electronic annotation///0005911 // cell-cell junction // infer…	0003779 // actin binding // inferred from electronic annotation///0004969 // histamine receptor activity // inferred from electronic annotation///0005515 // protein binding // inferred from physical interaction///0032403 // protein complex binding // inferred from direct assay///0032403 // protein complex binding // inferred from mutant phenotype	chr1:27730733-27816669 (-) // 95.54 // p36.11
212706_at	0.03035707	-1.7791382	-0.83117855	1.7791382	down	-1.6042944	-0.6819389	1.6042944	down	1.1575574	0.21108371	1.1575574	up	-1.3931729	-0.4783743	1.3931729	down	LOC102724229///RASA4	10156///102724229	0000165 // MAPK cascade // traceable author statement///0000186 // activation of MAPKK activity // traceable author statement///0007165 // signal transduction // inferred from electronic annotation///0007173 // epidermal growth factor receptor signaling pathway // traceable author statement///0007264 // small GTPase mediated signal transduction // traceable author statement///0007265 // Ras prote…	0005622 // intracellular // inferred from electronic annotation///0005737 // cytoplasm // not recorded///0005829 // cytosol // inferred from direct assay///0005829 // cytosol // traceable author statement///0005886 // plasma membrane // inferred from direct assay///0016020 // membrane // inferred from electronic annotation///0031235 // intrinsic component of the cytoplasmic side of the plasma mem…	0005096 // GTPase activator activity // inferred from direct assay///0005515 // protein binding // inferred from electronic annotation///0046872 // metal ion binding // inferred from electronic annotation	chr7:102219912-102257184 (-) // 82.89 // q22.1///chr7:102120749-102158205 (-) // 80.2 // q22.1
213071_at	0.015421257	-4.456225	-2.155822	4.456225	down	-3.7230828	-1.8964977	3.7230828	down	-1.5365281	-0.6196742	1.5365281	down	-3.2135615	-1.6841731	3.2135615	down	DPT	1805	0007155 // cell adhesion // inferred from electronic annotation///0008285 // negative regulation of cell proliferation // inferred from electronic annotation///0030199 // collagen fibril organization // inferred from electronic annotation	0005576 // extracellular region // inferred from electronic annotation///0005578 // proteinaceous extracellular matrix // inferred from electronic annotation///0005615 // extracellular space // inferred from direct assay///0031012 // extracellular matrix // inferred from direct assay///0031012 // extracellular matrix // inferred from sequence or structural similarity///0070062 // extracellular ex…		chr1:168664705-168698421 (-) // 96.86 // q24.2
207977_s_at	0.013909082	-6.239805	-2.641501	6.239805	down	-5.646121	-2.49726	5.646121	down	-1.6322105	-0.70682716	1.6322105	down	-5.047386	-2.3355365	5.047386	down	DPT	1805	0007155 // cell adhesion // inferred from electronic annotation///0008285 // negative regulation of cell proliferation // inferred from electronic annotation///0030199 // collagen fibril organization // inferred from electronic annotation	0005576 // extracellular region // inferred from electronic annotation///0005578 // proteinaceous extracellular matrix // inferred from electronic annotation///0005615 // extracellular space // inferred from direct assay///0031012 // extracellular matrix // inferred from direct assay///0031012 // extracellular matrix // inferred from sequence or structural similarity///0070062 // extracellular ex…		chr1:168665747-168698418 (-) // 90.24 // q24.2
213068_at	0.006347434	-6.710213	-2.7463586	6.710213	down	-4.7751274	-2.2555392	4.7751274	down	-1.6453184	-0.71836674	1.6453184	down	-5.6749697	-2.5046127	5.6749697	down	DPT	1805	0007155 // cell adhesion // inferred from electronic annotation///0008285 // negative regulation of cell proliferation // inferred from electronic annotation///0030199 // collagen fibril organization // inferred from electronic annotation	0005576 // extracellular region // inferred from electronic annotation///0005578 // proteinaceous extracellular matrix // inferred from electronic annotation///0005615 // extracellular space // inferred from direct assay///0031012 // extracellular matrix // inferred from direct assay///0031012 // extracellular matrix // inferred from sequence or structural similarity///0070062 // extracellular ex…		chr1:168664705-168698421 (-) // 96.86 // q24.2
