# Supplementary material for: Histaminergic System and Inflammation-Related Genes in Normal Large Intestine and Adenocarcinoma Tissues: Transcriptional Profiles and Relations
Source: Int J Mol Sci. 2023 Mar 3;24(5):4913. doi: 10.3390/ijms24054913 (PMC10002554; doi:10.3390/ijms24054913)
Supplement: Supplementary file 1 [file ijms-24-04913-s001.zip › Table S3. F.xlsx]

## Sheet: Infl CS anova incorr 181
Probe Set ID	p	FC ([CS I] vs [Control])	Log FC ([CS I] vs [Control])	FC (abs) ([CS I] vs [Control])	Regulation ([CS I] vs [Control])	FC ([CS II] vs [Control])	Log FC ([CS II] vs [Control])	FC (abs) ([CS II] vs [Control])	Regulation ([CS II] vs [Control])	FC ([CS III] vs [Control])	Log FC ([CS III] vs [Control])	FC (abs) ([CS III] vs [Control])	Regulation ([CS III] vs [Control])	FC ([CS IV] vs [Control])	Log FC ([CS IV] vs [Control])	FC (abs) ([CS IV] vs [Control])	Regulation ([CS IV] vs [Control])	Gene Symbol	Entrez Gene	Gene Ontology Biological Process	Gene Ontology Cellular Component	Gene Ontology Molecular Function	Alignments
209774_x_at	2.6281085E-5	9.22541	3.2056131	9.22541	up	3.7194374	1.8950844	3.7194374	up	4.432972	2.1482742	4.432972	up	2.4366486	1.2848983	2.4366486	up	CXCL2	2920	0002237 // response to molecule of bacterial origin // inferred from direct assay///0002690 // positive regulation of leukocyte chemotaxis // not recorded///0006935 // chemotaxis // traceable author statement///0006954 // inflammatory response // inferred from electronic annotation///0006955 // immune response // not recorded///0007186 // G-protein coupled receptor signaling pathway // not record…	0005576 // extracellular region // traceable author statement///0005615 // extracellular space // inferred from electronic annotation	0005125 // cytokine activity // inferred from electronic annotation///0005515 // protein binding // inferred from physical interaction///0008009 // chemokine activity // inferred from electronic annotation///0045236 // CXCR chemokine receptor binding // not recorded	chr4:74962800-74964892 (-) // 95.02 // q13.3
207850_at	1.8421854E-6	8.680362	3.1177552	8.680362	up	3.616849	1.8547333	3.616849	up	2.557827	1.3549187	2.557827	up	2.8421159	1.5069654	2.8421159	up	CXCL3	2921	0002690 // positive regulation of leukocyte chemotaxis // not recorded///0006935 // chemotaxis // inferred from electronic annotation///0006954 // inflammatory response // not recorded///0006955 // immune response // not recorded///0007186 // G-protein coupled receptor signaling pathway // not recorded///0030593 // neutrophil chemotaxis // inferred from sequence or structural similarity///0032496…	0005576 // extracellular region // traceable author statement///0005615 // extracellular space // inferred from direct assay	0005125 // cytokine activity // inferred from electronic annotation///0008009 // chemokine activity // not recorded///0008009 // chemokine activity // inferred from sequence or structural similarity///0045236 // CXCR chemokine receptor binding // not recorded	chr4:74902313-74904405 (-) // 92.86 // q13.3
204470_at	1.4722832E-5	6.678585	2.7395425	6.678585	up	3.9314303	1.9750543	3.9314303	up	2.5620677	1.3573086	2.5620677	up	3.0581548	1.6126615	3.0581548	up	CXCL1	2919	0002690 // positive regulation of leukocyte chemotaxis // not recorded///0006935 // chemotaxis // traceable author statement///0006954 // inflammatory response // inferred from electronic annotation///0006955 // immune response // not recorded///0007165 // signal transduction // traceable author statement///0007186 // G-protein coupled receptor signaling pathway // traceable author statement///00…	0005576 // extracellular region // traceable author statement///0005615 // extracellular space // inferred from electronic annotation///0005622 // intracellular // traceable author statement	0005102 // receptor binding // traceable author statement///0005125 // cytokine activity // inferred from electronic annotation///0008009 // chemokine activity // inferred from electronic annotation///0008047 // enzyme activator activity // traceable author statement///0008083 // growth factor activity // inferred from electronic annotation///0045236 // CXCR chemokine receptor binding // not reco…	chr4:74735108-74736953 (+) // 100.0 // q13.3
202859_x_at	3.4952452E-4	3.8853083	1.958029	3.8853083	up	4.349061	2.120704	4.349061	up	3.3335302	1.7370508	3.3335302	up	7.296434	2.8671916	7.296434	up	CXCL8	3576	0001525 // angiogenesis // traceable author statement///0002237 // response to molecule of bacterial origin // inferred from direct assay///0006928 // movement of cell or subcellular component // traceable author statement///0006935 // chemotaxis // traceable author statement///0006954 // inflammatory response // traceable author statement///0006955 // immune response // not recorded///0007050 //…	0005576 // extracellular region // traceable author statement///0005615 // extracellular space // inferred from electronic annotation///0005622 // intracellular // inferred from direct assay///0005622 // intracellular // traceable author statement	0005125 // cytokine activity // inferred from electronic annotation///0005153 // interleukin-8 receptor binding // inferred from physical interaction///0005515 // protein binding // inferred from physical interaction///0008009 // chemokine activity // traceable author statement	chr4:74606301-74609431 (+) // 70.71 // q13.3
219148_at	0.016950885	2.8698463	1.5209734	2.8698463	up	1.5866566	0.6659899	1.5866566	up	1.0456251	0.06436569	1.0456251	up	-1.0605918	-0.084869556	1.0605918	down	PBK	55872	0001933 // negative regulation of protein phosphorylation // inferred from electronic annotation///0006468 // protein phosphorylation // inferred from electronic annotation///0007067 // mitotic nuclear division // non-traceable author statement///0016310 // phosphorylation // inferred from electronic annotation///0032435 // negative regulation of proteasomal ubiquitin-dependent protein catabolic …	0005634 // nucleus // inferred from direct assay	0000166 // nucleotide binding // inferred from electronic annotation///0004672 // protein kinase activity // inferred from electronic annotation///0004674 // protein serine/threonine kinase activity // traceable author statement///0005515 // protein binding // inferred from physical interaction///0005524 // ATP binding // inferred from electronic annotation///0016301 // kinase activity // inferre…	chr8:27667412-27695300 (-) // 98.77 // p21.1
203936_s_at	5.3739075E-7	2.2109883	1.1446913	2.2109883	up	4.0840154	2.0299883	4.0840154	up	3.2186942	1.6864755	3.2186942	up	5.716333	2.51509	5.716333	up	MMP9	4318	0001501 // skeletal system development // inferred from electronic annotation///0001503 // ossification // inferred from electronic annotation///0001934 // positive regulation of protein phosphorylation // inferred from mutant phenotype///0006508 // proteolysis // inferred from direct assay///0007411 // axon guidance // traceable author statement///0007566 // embryo implantation // inferred from …	0005576 // extracellular region // traceable author statement///0005578 // proteinaceous extracellular matrix // inferred from electronic annotation///0005615 // extracellular space // inferred from direct assay///0031012 // extracellular matrix // inferred from electronic annotation///0070062 // extracellular exosome // inferred from direct assay	0004175 // endopeptidase activity // inferred from direct assay///0004222 // metalloendopeptidase activity // inferred from direct assay///0005509 // calcium ion binding // inferred from electronic annotation///0005515 // protein binding // inferred from physical interaction///0005518 // collagen binding // traceable author statement///0008233 // peptidase activity // inferred from electronic ann…	chr20:44637546-44645199 (+) // 97.17 // q13.12
205569_at	1.2764562E-4	2.0420964	1.0300509	2.0420964	up	1.8877926	0.91670024	1.8877926	up	1.8566546	0.89270544	1.8566546	up	1.5394435	0.62240887	1.5394435	up	LAMP3	27074	0002250 // adaptive immune response // inferred from electronic annotation///0002376 // immune system process // inferred from electronic annotation///0008283 // cell proliferation // traceable author statement	0005764 // lysosome // inferred from electronic annotation///0005765 // lysosomal membrane // inferred from electronic annotation///0016020 // membrane // inferred from electronic annotation///0016021 // integral component of membrane // inferred from electronic annotation///0030659 // cytoplasmic vesicle membrane // inferred from electronic annotation///0031410 // cytoplasmic vesicle // inferred…		chr3:182840003-182880506 (-) // 83.42 // q27.1
211506_s_at	0.0194044	2.0301797	1.0216074	2.0301797	up	2.5383737	1.3439045	2.5383737	up	1.6163442	0.6927344	1.6163442	up	5.0317287	2.3310542	5.0317287	up	CXCL8	3576	0001525 // angiogenesis // traceable author statement///0002237 // response to molecule of bacterial origin // inferred from direct assay///0006928 // movement of cell or subcellular component // traceable author statement///0006935 // chemotaxis // traceable author statement///0006954 // inflammatory response // traceable author statement///0006955 // immune response // not recorded///0007050 //…	0005576 // extracellular region // traceable author statement///0005615 // extracellular space // inferred from electronic annotation///0005622 // intracellular // inferred from direct assay///0005622 // intracellular // traceable author statement	0005125 // cytokine activity // inferred from electronic annotation///0005153 // interleukin-8 receptor binding // inferred from physical interaction///0005515 // protein binding // inferred from physical interaction///0008009 // chemokine activity // traceable author statement	chr4:74606368-74607738 (+) // 76.92 // q13.3
209396_s_at	5.0950417E-5	1.9403841	0.95634234	1.9403841	up	2.6612363	1.4120966	2.6612363	up	2.5690851	1.3612547	2.5690851	up	2.800592	1.4857318	2.800592	up	CHI3L1	1116	0005975 // carbohydrate metabolic process // inferred from electronic annotation///0006032 // chitin catabolic process // not recorded///0006915 // apoptotic process // inferred from electronic annotation///0006954 // inflammatory response // inferred from expression pattern///0007250 // activation of NF-kappaB-inducing kinase activity // inferred from sequence or structural similarity///0009612 …	0005576 // extracellular region // not recorded///0005578 // proteinaceous extracellular matrix // non-traceable author statement///0005615 // extracellular space // inferred from direct assay///0005737 // cytoplasm // inferred from sequence or structural similarity///0005783 // endoplasmic reticulum // inferred from sequence or structural similarity///0048471 // perinuclear region of cytoplasm /…	0004553 // hydrolase activity, hydrolyzing O-glycosyl compounds // inferred from electronic annotation///0004568 // chitinase activity // inferred from direct assay///0005201 // extracellular matrix structural constituent // non-traceable author statement///0008061 // chitin binding // inferred from direct assay///0030246 // carbohydrate binding // inferred from electronic annotation	chr1:203148056-203155822 (-) // 99.43 // q32.1
222062_at	0.0054061944	1.8599215	0.89524174	1.8599215	up	1.0566102	0.07944323	1.0566102	up	1.421142	0.50705075	1.421142	up	1.3172426	0.39752108	1.3172426	up	IL27RA	9466	0002827 // positive regulation of T-helper 1 type immune response // inferred from electronic annotation///0002829 // negative regulation of type 2 immune response // inferred from electronic annotation///0006955 // immune response // traceable author statement///0007166 // cell surface receptor signaling pathway // traceable author statement///0032729 // positive regulation of interferon-gamma p…	0005887 // integral component of plasma membrane // traceable author statement///0016020 // membrane // inferred from electronic annotation///0016021 // integral component of membrane // inferred from electronic annotation	0004888 // transmembrane signaling receptor activity // traceable author statement///0005515 // protein binding // inferred from electronic annotation///0045509 // interleukin-27 receptor activity // inferred from electronic annotation
212657_s_at	0.004205242	1.8165454	0.86119735	1.8165454	up	2.8023758	1.4866505	2.8023758	up	1.5349581	0.6181993	1.5349581	up	3.02425	1.5965774	3.02425	up	IL1RN	3557	0001660 // fever generation // inferred from electronic annotation///0001960 // negative regulation of cytokine-mediated signaling pathway // inferred from direct assay///0002437 // inflammatory response to antigenic stimulus // ---///0002439 // chronic inflammatory response to antigenic stimulus // inferred from electronic annotation///0006629 // lipid metabolic process // inferred from electron…	0005576 // extracellular region // inferred from electronic annotation///0005615 // extracellular space // inferred from direct assay///0005622 // intracellular // non-traceable author statement///0005737 // cytoplasm // inferred from electronic annotation///0005886 // plasma membrane // traceable author statement///0031982 // vesicle // inferred from electronic annotation///0070062 // extracellu…	0005125 // cytokine activity // not recorded///0005149 // interleukin-1 receptor binding // inferred from direct assay///0005150 // interleukin-1, Type I receptor binding // inferred from physical interaction///0005151 // interleukin-1, Type II receptor binding // inferred from physical interaction///0005152 // interleukin-1 receptor antagonist activity // inferred from direct assay///0005152 // …	chr2:113885169-113891593 (+) // 73.62 // q13
209395_at	1.02633116E-4	1.7998743	0.84789616	1.7998743	up	2.8426237	1.5072231	2.8426237	up	2.148273	1.1031773	2.148273	up	2.4318895	1.2820777	2.4318895	up	CHI3L1	1116	0005975 // carbohydrate metabolic process // inferred from electronic annotation///0006032 // chitin catabolic process // not recorded///0006915 // apoptotic process // inferred from electronic annotation///0006954 // inflammatory response // inferred from expression pattern///0007250 // activation of NF-kappaB-inducing kinase activity // inferred from sequence or structural similarity///0009612 …	0005576 // extracellular region // not recorded///0005578 // proteinaceous extracellular matrix // non-traceable author statement///0005615 // extracellular space // inferred from direct assay///0005737 // cytoplasm // inferred from sequence or structural similarity///0005783 // endoplasmic reticulum // inferred from sequence or structural similarity///0048471 // perinuclear region of cytoplasm /…	0004553 // hydrolase activity, hydrolyzing O-glycosyl compounds // inferred from electronic annotation///0004568 // chitinase activity // inferred from direct assay///0005201 // extracellular matrix structural constituent // non-traceable author statement///0008061 // chitin binding // inferred from direct assay///0030246 // carbohydrate binding // inferred from electronic annotation	chr1:203148056-203155822 (-) // 99.43 // q32.1
209083_at	0.010998936	1.7852037	0.83608866	1.7852037	up	-1.1537954	-0.20638737	1.1537954	down	2.2609763	1.1769459	2.2609763	up	-1.1071228	-0.14681521	1.1071228	down	CORO1A	11151	0001771 // immunological synapse formation // inferred from mutant phenotype///0001845 // phagolysosome assembly // inferred from mutant phenotype///0006816 // calcium ion transport // inferred from electronic annotation///0006909 // phagocytosis // inferred from mutant phenotype///0006928 // movement of cell or subcellular component // non-traceable author statement///0007015 // actin filament o…	0001772 // immunological synapse // inferred from direct assay///0001891 // phagocytic cup // inferred from direct assay///0005634 // nucleus // inferred from direct assay///0005737 // cytoplasm // inferred from direct assay///0005769 // early endosome // inferred from electronic annotation///0005856 // cytoskeleton // inferred from electronic annotation///0005884 // actin filament // inferred fr…	0003779 // actin binding // inferred from physical interaction///0003785 // actin monomer binding // inferred from mutant phenotype///0005515 // protein binding // inferred from physical interaction///0008022 // protein C-terminus binding // inferred from physical interaction///0008092 // cytoskeletal protein binding // inferred from sequence or structural similarity///0032036 // myosin heavy cha…	chr16:30194955-30200396 (+) // 96.98 // p11.2
202207_at	0.0011459491	1.7782081	0.8304242	1.7782081	up	1.8055571	0.85244405	1.8055571	up	2.277244	1.187289	2.277244	up	2.010406	1.0074869	2.010406	up	ARL4C	10123	0006810 // transport // inferred from electronic annotation///0006886 // intracellular protein transport // inferred from electronic annotation///0007264 // small GTPase mediated signal transduction // inferred from electronic annotation///0008152 // metabolic process // traceable author statement///0015031 // protein transport // inferred from electronic annotation///0032456 // endocytic recycli…	0005622 // intracellular // inferred from electronic annotation///0005634 // nucleus // traceable author statement///0005737 // cytoplasm // inferred from direct assay///0005886 // plasma membrane // inferred from direct assay///0016020 // membrane // inferred from electronic annotation///0030175 // filopodium // inferred from electronic annotation///0042995 // cell projection // inferred from el…	0000166 // nucleotide binding // inferred from electronic annotation///0003924 // GTPase activity // traceable author statement///0005515 // protein binding // inferred from physical interaction///0005525 // GTP binding // inferred from electronic annotation///0043014 // alpha-tubulin binding // inferred from direct assay	chr2:235401681-235405622 (-) // 95.42 // q37.1
201587_s_at	1.8184458E-8	1.7114334	0.77520514	1.7114334	up	2.9515254	1.5614607	2.9515254	up	1.3325372	0.41417572	1.3325372	up	1.5988562	0.6770402	1.5988562	up	IRAK1	3654	0000187 // activation of MAPK activity // traceable author statement///0001959 // regulation of cytokine-mediated signaling pathway // inferred from mutant phenotype///0002224 // toll-like receptor signaling pathway // traceable author statement///0002376 // immune system process // inferred from electronic annotation///0002755 // MyD88-dependent toll-like receptor signaling pathway // traceable …	0005622 // intracellular // ---///0005634 // nucleus // inferred from direct assay///0005737 // cytoplasm // inferred from direct assay///0005811 // lipid particle // inferred from sequence or structural similarity///0005829 // cytosol // traceable author statement///0005886 // plasma membrane // not recorded///0005886 // plasma membrane // traceable author statement///0010008 // endosome membran…	0000166 // nucleotide binding // inferred from electronic annotation///0004672 // protein kinase activity // inferred from direct assay///0004672 // protein kinase activity // traceable author statement///0004674 // protein serine/threonine kinase activity // not recorded///0004674 // protein serine/threonine kinase activity // non-traceable author statement///0004704 // NF-kappaB-inducing kinase…	chrX:153275961-153285342 (-) // 87.8 // q28
205844_at	0.02954387	1.6961101	0.76222986	1.6961101	up	1.6828182	0.7508793	1.6828182	up	1.2215245	0.28868276	1.2215245	up	1.2988542	0.37723953	1.2988542	up	VNN1	8876	0002526 // acute inflammatory response // inferred from sequence or structural similarity///0002544 // chronic inflammatory response // inferred from sequence or structural similarity///0006807 // nitrogen compound metabolic process // inferred from electronic annotation///0006928 // movement of cell or subcellular component // traceable author statement///0006954 // inflammatory response // infe…	0005886 // plasma membrane // inferred from electronic annotation///0016020 // membrane // inferred from electronic annotation///0016021 // integral component of membrane // traceable author statement///0031225 // anchored component of membrane // inferred from electronic annotation///0070062 // extracellular exosome // inferred from direct assay	0016787 // hydrolase activity // inferred from electronic annotation///0016810 // hydrolase activity, acting on carbon-nitrogen (but not peptide) bonds // inferred from electronic annotation///0016811 // hydrolase activity, acting on carbon-nitrogen (but not peptide) bonds, in linear amides // inferred from electronic annotation///0017159 // pantetheine hydrolase activity // inferred from direct …	chr6:133002729-133035188 (-) // 88.23 // q23.2
200989_at	0.0044275667	1.5682712	0.649175	1.5682712	up	1.0958601	0.1320636	1.0958601	up	1.7736065	0.826686	1.7736065	up	1.3375112	0.4195509	1.3375112	up	HIF1A	3091	0001525 // angiogenesis // inferred from electronic annotation///0001568 // blood vessel development // inferred from electronic annotation///0001666 // response to hypoxia // inferred from direct assay///0001666 // response to hypoxia // inferred from mutant phenotype///0001755 // neural crest cell migration // inferred from electronic annotation///0001837 // epithelial to mesenchymal transition…	0005634 // nucleus // inferred from direct assay///0005654 // nucleoplasm // traceable author statement///0005667 // transcription factor complex // inferred from physical interaction///0005730 // nucleolus // inferred from direct assay///0005737 // cytoplasm // inferred from direct assay///0005829 // cytosol // inferred from direct assay///0005829 // cytosol // traceable author statement///00166…	0000981 // RNA polymerase II transcription factor activity, sequence-specific DNA binding // inferred from electronic annotation///0000989 // transcription factor activity, transcription factor binding // inferred from direct assay///0001076 // transcription factor activity, RNA polymerase II transcription factor binding // inferred from electronic annotation///0001077 // transcriptional activato…	chr14:62162272-62214970 (+) // 99.08 // q23.2
217733_s_at	0.0027772337	1.5619413	0.6433402	1.5619413	up	1.6576866	0.7291713	1.6576866	up	1.4564016	0.5424082	1.4564016	up	1.5986071	0.67681533	1.5986071	up	TMSB10	9168	0007015 // actin filament organization // inferred from electronic annotation///0030036 // actin cytoskeleton organization // inferred from electronic annotation///0042989 // sequestering of actin monomers // inferred from electronic annotation	0005737 // cytoplasm // inferred from electronic annotation///0005856 // cytoskeleton // inferred from electronic annotation	0003779 // actin binding // inferred from electronic annotation///0003785 // actin monomer binding // inferred from electronic annotation///0005515 // protein binding // inferred from physical interaction	chr2:85132792-85133799 (+) // 99.78 // p11.2
218014_at	0.019692011	1.5439776	0.6266519	1.5439776	up	1.364455	0.44832486	1.364455	up	1.2310308	0.2998669	1.2310308	up	1.3399088	0.42213488	1.3399088	up	NUP85	79902	0000278 // mitotic cell cycle // traceable author statement///0005975 // carbohydrate metabolic process // traceable author statement///0006406 // mRNA export from nucleus // not recorded///0006606 // protein import into nucleus // not recorded///0006810 // transport // inferred from electronic annotation///0006935 // chemotaxis // inferred from electronic annotation///0007077 // mitotic nuclear …	0000775 // chromosome, centromeric region // inferred from electronic annotation///0000776 // kinetochore // inferred from direct assay///0000777 // condensed chromosome kinetochore // inferred from electronic annotation///0005634 // nucleus // inferred from electronic annotation///0005635 // nuclear envelope // traceable author statement///0005643 // nuclear pore // inferred from electronic anno…	0005515 // protein binding // inferred from physical interaction///0017056 // structural constituent of nuclear pore // not recorded	chr17:73201785-73231852 (+) // 98.6 // q25.1
217523_at	0.0016715591	1.473124	0.5588789	1.473124	up	1.3579966	0.44147983	1.3579966	up	1.6193744	0.6954366	1.6193744	up	2.5224264	1.3348122	2.5224264	up	CD44	960	0001658 // branching involved in ureteric bud morphogenesis // inferred from electronic annotation///0002246 // wound healing involved in inflammatory response // inferred from electronic annotation///0005975 // carbohydrate metabolic process // traceable author statement///0007155 // cell adhesion // inferred from electronic annotation///0007160 // cell-matrix adhesion // non-traceable author st…	0005737 // cytoplasm // inferred from direct assay///0005794 // Golgi apparatus // inferred from direct assay///0005886 // plasma membrane // inferred from direct assay///0005886 // plasma membrane // traceable author statement///0005887 // integral component of plasma membrane // non-traceable author statement///0005925 // focal adhesion // inferred from direct assay///0009897 // external side o…	0004415 // hyalurononglucosaminidase activity // inferred from direct assay///0004896 // cytokine receptor activity // inferred from direct assay///0005515 // protein binding // inferred from physical interaction///0005518 // collagen binding // non-traceable author statement///0005540 // hyaluronic acid binding // inferred from direct assay///0005540 // hyaluronic acid binding // non-traceable a…	chr11:35218274-35218983 (+) // 99.3 // p13
220780_at	0.0018274444	1.4459636	0.53203124	1.4459636	up	-1.0048052	-0.0069159186	1.0048052	down	1.027585	0.0392577	1.027585	up	1.3058243	0.3849607	1.3058243	up	PLA2G3	50487	0001675 // acrosome assembly // inferred from electronic annotation///0006629 // lipid metabolic process // inferred from electronic annotation///0006644 // phospholipid metabolic process // traceable author statement///0007288 // sperm axoneme assembly // inferred from electronic annotation///0016042 // lipid catabolic process // inferred from electronic annotation///0019372 // lipoxygenase path…	0005576 // extracellular region // traceable author statement///0005615 // extracellular space // traceable author statement///0005737 // cytoplasm // inferred from electronic annotation///0005814 // centriole // inferred from direct assay///0005856 // cytoskeleton // inferred from electronic annotation///0005886 // plasma membrane // inferred from electronic annotation///0016020 // membrane // i…	0004623 // phospholipase A2 activity // inferred from electronic annotation///0005509 // calcium ion binding // inferred from electronic annotation///0016787 // hydrolase activity // inferred from electronic annotation///0046872 // metal ion binding // inferred from electronic annotation///0047498 // calcium-dependent phospholipase A2 activity // traceable author statement	chr22:31530794-31536593 (-) // 90.22 // q12.2
205255_x_at	5.6622066E-5	1.4131631	0.4989279	1.4131631	up	1.4106088	0.49631786	1.4106088	up	1.2504287	0.3224227	1.2504287	up	1.8084565	0.8547589	1.8084565	up	TCF7	6932	0006351 // transcription, DNA-templated // inferred from electronic annotation///0006355 // regulation of transcription, DNA-templated // inferred from electronic annotation///0006355 // regulation of transcription, DNA-templated // ---///0006357 // regulation of transcription from RNA polymerase II promoter // not recorded///0006955 // immune response // traceable author statement///0007420 // b…	0005634 // nucleus // inferred from direct assay///0005654 // nucleoplasm // traceable author statement///0005667 // transcription factor complex // not recorded	0003677 // DNA binding // inferred from electronic annotation///0003682 // chromatin binding // not recorded///0003700 // transcription factor activity, sequence-specific DNA binding // not recorded///0005515 // protein binding // inferred from physical interaction///0008013 // beta-catenin binding // inferred from direct assay///0043565 // sequence-specific DNA binding // not recorded///0044212 …	chr5:133451315-133483919 (+) // 89.07 // q31.1
206513_at	0.003635997	1.3857996	0.47071874	1.3857996	up	-1.0106741	-0.0153178945	1.0106741	down	1.5293167	0.61288714	1.5293167	up	1.3907945	0.47590926	1.3907945	up	AIM2	9447	0002218 // activation of innate immune response // inferred from direct assay///0002230 // positive regulation of defense response to virus by host // inferred from sequence or structural similarity///0002376 // immune system process // inferred from electronic annotation///0006915 // apoptotic process // inferred from electronic annotation///0006954 // inflammatory response // inferred from elec…	0005634 // nucleus // inferred from electronic annotation///0005737 // cytoplasm // inferred from direct assay///0005829 // cytosol // traceable author statement///0097169 // AIM2 inflammasome complex // inferred from direct assay	0003677 // DNA binding // inferred from electronic annotation///0003690 // double-stranded DNA binding // inferred from direct assay///0005515 // protein binding // inferred from physical interaction///0042802 // identical protein binding // inferred from physical interaction	chr1:159032274-159046647 (-) // 94.68 // q23.1
212070_at	2.440874E-5	1.3788965	0.46351415	1.3788965	up	4.384441	2.132393	4.384441	up	1.9139357	0.93654233	1.9139357	up	3.9522135	1.9826609	3.9522135	up	ADGRG1	9289	0001525 // angiogenesis // inferred from direct assay///0007155 // cell adhesion // inferred from electronic annotation///0007165 // signal transduction // inferred from electronic annotation///0007166 // cell surface receptor signaling pathway // inferred from electronic annotation///0007186 // G-protein coupled receptor signaling pathway // inferred from electronic annotation///0007266 // Rho p…	0005576 // extracellular region // inferred from electronic annotation///0005622 // intracellular // inferred from direct assay///0005886 // plasma membrane // inferred from electronic annotation///0005887 // integral component of plasma membrane // traceable author statement///0016020 // membrane // inferred from electronic annotation///0016021 // integral component of membrane // traceable auth…	0004871 // signal transducer activity // inferred from electronic annotation///0004888 // transmembrane signaling receptor activity // inferred from electronic annotation///0004930 // G-protein coupled receptor activity // inferred from sequence or structural similarity///0005518 // collagen binding // inferred from sequence or structural similarity///0050840 // extracellular matrix binding // in…	chr16:57662637-57699071 (+) // 85.48 // q21
206025_s_at	2.4900373E-4	1.3597734	0.4433663	1.3597734	up	1.5576664	0.63938636	1.5576664	up	2.781189	1.4757018	2.781189	up	4.1988177	2.0699832	4.1988177	up	TNFAIP6	7130	0006954 // inflammatory response // traceable author statement///0007155 // cell adhesion // inferred from electronic annotation///0007165 // signal transduction // traceable author statement///0007267 // cell-cell signaling // traceable author statement///0030335 // positive regulation of cell migration // inferred from electronic annotation///0030728 // ovulation // inferred from electronic ann…	0005615 // extracellular space // inferred from electronic annotation	0005540 // hyaluronic acid binding // inferred from electronic annotation	chr2:152214105-152236553 (+) // 70.63 // q23.3
206236_at	2.3677909E-4	1.3579941	0.44147724	1.3579941	up	1.2793062	0.35536164	1.2793062	up	1.3545933	0.43785974	1.3545933	up	1.5277417	0.6114006	1.5277417	up	GPR4	2828	0007165 // signal transduction // inferred from electronic annotation///0007186 // G-protein coupled receptor signaling pathway // inferred from electronic annotation	0005886 // plasma membrane // traceable author statement///0005887 // integral component of plasma membrane // traceable author statement///0016020 // membrane // inferred from electronic annotation///0016021 // integral component of membrane // inferred from electronic annotation	0004871 // signal transducer activity // inferred from electronic annotation///0004930 // G-protein coupled receptor activity // inferred from electronic annotation	chr19:46093024-46095717 (-) // 83.68 // q13.32
213003_s_at	0.02455803	1.3519232	0.4350132	1.3519232	up	1.035449	0.050256595	1.035449	up	1.1548862	0.2077507	1.1548862	up	1.2459368	0.31723088	1.2459368	up	SPIDR	23514	0000724 // double-strand break repair via homologous recombination // inferred from mutant phenotype///0000724 // double-strand break repair via homologous recombination // traceable author statement///0006281 // DNA repair // traceable author statement///0006302 // double-strand break repair // traceable author statement///0006310 // DNA recombination // inferred from electronic annotation///000…	0000228 // nuclear chromosome // inferred from direct assay///0005634 // nucleus // inferred from electronic annotation///0005654 // nucleoplasm // inferred from direct assay///0005654 // nucleoplasm // traceable author statement	0005515 // protein binding // inferred from physical interaction	chr8:48648641-48650235 (+) // 96.86 // q11.21
204382_at	3.5865724E-4	1.346332	0.42903417	1.346332	up	1.2140644	0.27984497	1.2140644	up	1.1111255	0.15202174	1.1111255	up	1.4778047	0.56345564	1.4778047	up	NAT9	26151	0006474 // N-terminal protein amino acid acetylation // not recorded///0008152 // metabolic process // inferred from electronic annotation	0043234 // protein complex // inferred from direct assay	0005515 // protein binding // inferred from physical interaction///0008080 // N-acetyltransferase activity // not recorded///0016740 // transferase activity // inferred from electronic annotation///0016746 // transferase activity, transferring acyl groups // inferred from electronic annotation	chr17:72766687-72772436 (-) // 95.07 // q25.1
205499_at	1.6132442E-5	1.345342	0.42797303	1.345342	up	2.9525685	1.5619706	2.9525685	up	2.4115992	1.2699901	2.4115992	up	3.2776208	1.712649	3.2776208	up	SRPX2	27286	0001525 // angiogenesis // inferred from electronic annotation///0007155 // cell adhesion // inferred from electronic annotation///0016337 // single organismal cell-cell adhesion // inferred from direct assay///0042325 // regulation of phosphorylation // inferred from direct assay///0048870 // cell motility // inferred from direct assay///0051965 // positive regulation of synapse assembly // infe…	0005576 // extracellular region // inferred from electronic annotation///0005615 // extracellular space // inferred from direct assay///0005737 // cytoplasm // inferred from direct assay///0009986 // cell surface // inferred from sequence or structural similarity///0030054 // cell junction // inferred from electronic annotation///0045202 // synapse // inferred from electronic annotation///0060076…	0005102 // receptor binding // inferred from physical interaction///0005515 // protein binding // inferred from physical interaction///0036458 // hepatocyte growth factor binding // inferred from direct assay///0042802 // identical protein binding // inferred from direct assay	chrX:99899224-99926292 (+) // 97.23 // q22.1
218368_s_at	0.0014029315	1.3376433	0.41969344	1.3376433	up	1.4487296	0.53478837	1.4487296	up	1.4787161	0.5643451	1.4787161	up	1.7985218	0.84681165	1.7985218	up	TNFRSF12A	51330	0001525 // angiogenesis // inferred from electronic annotation///0006915 // apoptotic process // inferred from electronic annotation///0006931 // substrate-dependent cell migration, cell attachment to substrate // inferred from electronic annotation///0007155 // cell adhesion // inferred from electronic annotation///0007275 // multicellular organismal development // inferred from electronic annot…	0001726 // ruffle // inferred from electronic annotation///0005886 // plasma membrane // traceable author statement///0009986 // cell surface // inferred from electronic annotation///0016020 // membrane // inferred from electronic annotation///0016021 // integral component of membrane // inferred from electronic annotation	0005515 // protein binding // inferred from physical interaction	chr16:3070359-3072381 (+) // 96.69 // p13.3
210357_s_at	4.9654767E-7	1.3127006	0.39253798	1.3127006	up	1.3842568	0.46911168	1.3842568	up	1.3241163	0.40502992	1.3241163	up	2.607829	1.3828493	2.607829	up	SMOX	54498	0006595 // polyamine metabolic process // traceable author statement///0006596 // polyamine biosynthetic process // traceable author statement///0006598 // polyamine catabolic process // inferred from direct assay///0006805 // xenobiotic metabolic process // traceable author statement///0034641 // cellular nitrogen compound metabolic process // traceable author statement///0044281 // small molecu…	0005634 // nucleus // inferred from direct assay///0005634 // nucleus // inferred from electronic annotation///0005737 // cytoplasm // inferred from direct assay///0005829 // cytosol // traceable author statement	0016491 // oxidoreductase activity // inferred from electronic annotation///0046592 // polyamine oxidase activity // inferred from direct assay///0052894 // norspermine:oxygen oxidoreductase activity // inferred from electronic annotation///0052895 // N1-acetylspermine:oxygen oxidoreductase (N1-acetylspermidine-forming) activity // inferred from electronic annotation///0052901 // spermine:oxygen …	chr20:4129507-4168368 (+) // 98.54 // p13
201786_s_at	0.03393705	1.2937307	0.37153736	1.2937307	up	1.348489	0.4313438	1.348489	up	1.0341605	0.048460074	1.0341605	up	1.0826981	0.11463097	1.0826981	up	ADAR	103	0001649 // osteoblast differentiation // inferred from electronic annotation///0001701 // in utero embryonic development // inferred from electronic annotation///0002244 // hematopoietic progenitor cell differentiation // inferred from electronic annotation///0002376 // immune system process // inferred from electronic annotation///0002566 // somatic diversification of immune receptors via somati…	0005634 // nucleus // inferred from direct assay///0005634 // nucleus // traceable author statement///0005654 // nucleoplasm // inferred from direct assay///0005654 // nucleoplasm // traceable author statement///0005730 // nucleolus // inferred from direct assay///0005737 // cytoplasm // inferred from direct assay///0005737 // cytoplasm // traceable author statement///0016020 // membrane // infer…	0003677 // DNA binding // inferred from electronic annotation///0003723 // RNA binding // inferred from electronic annotation///0003726 // double-stranded RNA adenosine deaminase activity // inferred from direct assay///0003726 // double-stranded RNA adenosine deaminase activity // non-traceable author statement///0004000 // adenosine deaminase activity // inferred from electronic annotation///00…	chr1:154554539-154580669 (-) // 99.64 // q21.3
219725_at	6.1348395E-4	1.2923847	0.3700356	1.2923847	up	1.3549151	0.43820256	1.3549151	up	1.4136935	0.49946946	1.4136935	up	1.5274136	0.6110908	1.5274136	up	TREM2	54209	0002588 // positive regulation of antigen processing and presentation of peptide antigen via MHC class II // inferred from direct assay///0006959 // humoral immune response // traceable author statement///0007411 // axon guidance // traceable author statement///0032497 // detection of lipopolysaccharide // inferred from electronic annotation///0032499 // detection of peptidoglycan // inferred fro…	0005576 // extracellular region // inferred from electronic annotation///0005886 // plasma membrane // traceable author statement///0016020 // membrane // inferred from electronic annotation///0016021 // integral component of membrane // inferred from direct assay///0043231 // intracellular membrane-bounded organelle // inferred from direct assay	0001530 // lipopolysaccharide binding // inferred from electronic annotation///0004872 // receptor activity // traceable author statement///0005515 // protein binding // inferred from electronic annotation///0042834 // peptidoglycan binding // inferred from electronic annotation///0070891 // lipoteichoic acid binding // inferred from electronic annotation///0097110 // scaffold protein binding // …	chr6:41126252-41130914 (-) // 99.52 // p21.1
204257_at	0.04015676	1.2864994	0.36345077	1.2864994	up	1.028452	0.04047457	1.028452	up	1.3040323	0.38297957	1.3040323	up	1.3230922	0.40391362	1.3230922	up	FADS3	3995	0006629 // lipid metabolic process // inferred from electronic annotation///0006631 // fatty acid metabolic process // inferred from electronic annotation///0006633 // fatty acid biosynthetic process // inferred from electronic annotation///0006636 // unsaturated fatty acid biosynthetic process // non-traceable author statement///0055114 // oxidation-reduction process // inferred from electronic …	0005783 // endoplasmic reticulum // inferred from electronic annotation///0005789 // endoplasmic reticulum membrane // inferred from electronic annotation///0016020 // membrane // non-traceable author statement///0016021 // integral component of membrane // inferred from electronic annotation	0016491 // oxidoreductase activity // inferred from electronic annotation	chr11:61640998-61658986 (-) // 92.83 // q12.2
202961_s_at	0.020700764	1.2857021	0.36255646	1.2857021	up	1.6593517	0.7306197	1.6593517	up	1.1279857	0.17374879	1.1279857	up	-1.0397779	-0.056275308	1.0397779	down	ATP5J2	9551	0006754 // ATP biosynthetic process // inferred from electronic annotation///0006810 // transport // inferred from electronic annotation///0006811 // ion transport // inferred from electronic annotation///0015992 // proton transport // non-traceable author statement///0022904 // respiratory electron transport chain // traceable author statement///0042776 // mitochondrial ATP synthesis coupled pro…	0000276 // mitochondrial proton-transporting ATP synthase complex, coupling factor F(o) // inferred from electronic annotation///0005634 // nucleus // inferred from direct assay///0005739 // mitochondrion // inferred from electronic annotation///0005743 // mitochondrial inner membrane // traceable author statement///0005753 // mitochondrial proton-transporting ATP synthase complex // inferred fro…	0016887 // ATPase activity // inferred from direct assay///0022857 // transmembrane transporter activity // inferred by curator	chr7:99055818-99063790 (-) // 97.79 // q22.1
211249_at	0.022384886	1.2652558	0.33942914	1.2652558	up	1.0708424	0.09874612	1.0708424	up	1.0631096	0.08829035	1.0631096	up	1.3207042	0.4013074	1.3207042	up	GPR68	8111	0006954 // inflammatory response // traceable author statement///0007165 // signal transduction // inferred from electronic annotation///0007186 // G-protein coupled receptor signaling pathway // inferred from electronic annotation///0032024 // positive regulation of insulin secretion // inferred from electronic annotation///0035774 // positive regulation of insulin secretion involved in cellular…	0005886 // plasma membrane // traceable author statement///0005887 // integral component of plasma membrane // traceable author statement///0016020 // membrane // inferred from electronic annotation///0016021 // integral component of membrane // inferred from electronic annotation	0004871 // signal transducer activity // inferred from electronic annotation///0004930 // G-protein coupled receptor activity // inferred from electronic annotation	chr14:91700211-91701494 (-) // 99.61 // q32.11
210354_at	0.033772077	1.2624767	0.33625668	1.2624767	up	-1.0265491	-0.037802573	1.0265491	down	-1.0116892	-0.016766086	1.0116892	down	1.0003086	4.4527184E-4	1.0003086	up	IFNG	3458	0000060 // protein import into nucleus, translocation // inferred from direct assay///0000122 // negative regulation of transcription from RNA polymerase II promoter // inferred from sequence or structural similarity///0001781 // neutrophil apoptotic process // inferred from electronic annotation///0002026 // regulation of the force of heart contraction // inferred from electronic annotation///00…	0005576 // extracellular region // inferred from direct assay///0005576 // extracellular region // traceable author statement///0005615 // extracellular space // not recorded///0005622 // intracellular // inferred from direct assay///0009897 // external side of plasma membrane // inferred from electronic annotation	0005125 // cytokine activity // not recorded///0005133 // interferon-gamma receptor binding // inferred from electronic annotation///0005515 // protein binding // inferred from electronic annotation	chr12:68548773-68553522 (-) // 93.76 // q15
213416_at	0.037552956	1.2578251	0.3309314	1.2578251	up	-1.2956388	-0.3736636	1.2956388	down	1.5668676	0.6478833	1.5668676	up	-1.11992	-0.16339576	1.11992	down	ITGA4	3676	0001974 // blood vessel remodeling // inferred from electronic annotation///0002687 // positive regulation of leukocyte migration // inferred from electronic annotation///0003366 // cell-matrix adhesion involved in ameboidal cell migration // inferred from mutant phenotype///0007155 // cell adhesion // inferred from electronic annotation///0007157 // heterophilic cell-cell adhesion via plasma mem…	0005886 // plasma membrane // inferred from direct assay///0005886 // plasma membrane // traceable author statement///0005911 // cell-cell junction // inferred from electronic annotation///0005925 // focal adhesion // inferred from direct assay///0008305 // integrin complex // inferred from electronic annotation///0009897 // external side of plasma membrane // inferred from electronic annotation/…	0001968 // fibronectin binding // inferred from electronic annotation///0005515 // protein binding // inferred from physical interaction///0046872 // metal ion binding // inferred from electronic annotation///0050839 // cell adhesion molecule binding // inferred from mutant phenotype///0050839 // cell adhesion molecule binding // inferred from physical interaction///1990405 // protein antigen bin…	chr2:182401052-182402997 (+) // 82.52 // q31.3
205926_at	0.015840486	1.2520206	0.3242583	1.2520206	up	1.2534527	0.3259075	1.2534527	up	1.2388353	0.3089844	1.2388353	up	1.2397218	0.31001642	1.2397218	up	IL27RA	9466	0002827 // positive regulation of T-helper 1 type immune response // inferred from electronic annotation///0002829 // negative regulation of type 2 immune response // inferred from electronic annotation///0006955 // immune response // traceable author statement///0007166 // cell surface receptor signaling pathway // traceable author statement///0032729 // positive regulation of interferon-gamma p…	0005887 // integral component of plasma membrane // traceable author statement///0016020 // membrane // inferred from electronic annotation///0016021 // integral component of membrane // inferred from electronic annotation	0004888 // transmembrane signaling receptor activity // traceable author statement///0005515 // protein binding // inferred from electronic annotation///0045509 // interleukin-27 receptor activity // inferred from electronic annotation	chr19:14142551-14163716 (+) // 84.64 // p13.12
211837_s_at	0.0153656425	1.2456524	0.3169016	1.2456524	up	1.0065513	0.00942062	1.0065513	up	-1.094901	-0.13080043	1.094901	down	1.0976155	0.1343727	1.0976155	up	PTCRA	171558		0016020 // membrane // inferred from electronic annotation///0016021 // integral component of membrane // inferred from electronic annotation	0005515 // protein binding // inferred from physical interaction	chr6:42883807-42893420 (+) // 94.94 // p21.1
205130_at	5.800879E-6	1.2388256	0.308973	1.2388256	up	1.0079253	0.011388764	1.0079253	up	1.2276099	0.29585218	1.2276099	up	2.0078628	1.0056608	2.0078628	up	MOK	5891	0006468 // protein phosphorylation // inferred from electronic annotation///0007165 // signal transduction // traceable author statement///0016310 // phosphorylation // inferred from electronic annotation///0051726 // regulation of cell cycle // inferred from electronic annotation	0005737 // cytoplasm // inferred from electronic annotation	0000166 // nucleotide binding // inferred from electronic annotation///0004672 // protein kinase activity // traceable author statement///0004674 // protein serine/threonine kinase activity // traceable author statement///0004693 // cyclin-dependent protein serine/threonine kinase activity // inferred from electronic annotation///0005524 // ATP binding // inferred from electronic annotation///001…	chr14:102695178-102771531 (-) // 98.87 // q32.31
216243_s_at	0.012464954	1.2335241	0.30278584	1.2335241	up	1.461434	0.5473847	1.461434	up	1.1316006	0.17836487	1.1316006	up	1.7591056	0.8148421	1.7591056	up	IL1RN	3557	0001660 // fever generation // inferred from electronic annotation///0001960 // negative regulation of cytokine-mediated signaling pathway // inferred from direct assay///0002437 // inflammatory response to antigenic stimulus // ---///0002439 // chronic inflammatory response to antigenic stimulus // inferred from electronic annotation///0006629 // lipid metabolic process // inferred from electron…	0005576 // extracellular region // inferred from electronic annotation///0005615 // extracellular space // inferred from direct assay///0005622 // intracellular // non-traceable author statement///0005737 // cytoplasm // inferred from electronic annotation///0005886 // plasma membrane // traceable author statement///0031982 // vesicle // inferred from electronic annotation///0070062 // extracellu…	0005125 // cytokine activity // not recorded///0005149 // interleukin-1 receptor binding // inferred from direct assay///0005150 // interleukin-1, Type I receptor binding // inferred from physical interaction///0005151 // interleukin-1, Type II receptor binding // inferred from physical interaction///0005152 // interleukin-1 receptor antagonist activity // inferred from direct assay///0005152 // …	chr2:113875517-113890404 (+) // 95.42 // q13
204208_at	0.011329214	1.2309344	0.29975387	1.2309344	up	1.0535454	0.07525238	1.0535454	up	1.2360996	0.30579495	1.2360996	up	1.2075465	0.27207878	1.2075465	up	RNGTT	8732	0006366 // transcription from RNA polymerase II promoter // traceable author statement///0006370 // 7-methylguanosine mRNA capping // inferred from direct assay///0006370 // 7-methylguanosine mRNA capping // traceable author statement///0006396 // RNA processing // inferred from direct assay///0006397 // mRNA processing // inferred from electronic annotation///0006470 // protein dephosphorylation…	0005634 // nucleus // traceable author statement///0005654 // nucleoplasm // traceable author statement	0000166 // nucleotide binding // inferred from electronic annotation///0003824 // catalytic activity // inferred from electronic annotation///0004484 // mRNA guanylyltransferase activity // inferred from direct assay///0004651 // polynucleotide 5'-phosphatase activity // traceable author statement///0004725 // protein tyrosine phosphatase activity // inferred from electronic annotation///0005525 …	chr6:89319998-89673304 (-) // 89.29 // q15
211396_at	0.0023803185	1.2234852	0.29099664	1.2234852	up	1.1923562	0.2538153	1.1923562	up	1.2063735	0.2706766	1.2063735	up	1.5371914	0.6202968	1.5371914	up	FCGR2C	9103	0006955 // immune response // non-traceable author statement///0007165 // signal transduction // non-traceable author statement	0005737 // cytoplasm // inferred from electronic annotation///0005886 // plasma membrane // inferred from electronic annotation///0016020 // membrane // inferred from electronic annotation///0016021 // integral component of membrane // non-traceable author statement	0004888 // transmembrane signaling receptor activity // non-traceable author statement///0005515 // protein binding // inferred from physical interaction///0019864 // IgG binding // inferred from electronic annotation	chr1:161551225-161562032 (+) // 91.81 // q23.3
202206_at	0.0028477767	1.2234354	0.29093793	1.2234354	up	1.4559405	0.5419514	1.4559405	up	1.9699074	0.9781278	1.9699074	up	1.4098431	0.49553466	1.4098431	up	ARL4C	10123	0006810 // transport // inferred from electronic annotation///0006886 // intracellular protein transport // inferred from electronic annotation///0007264 // small GTPase mediated signal transduction // inferred from electronic annotation///0008152 // metabolic process // traceable author statement///0015031 // protein transport // inferred from electronic annotation///0032456 // endocytic recycli…	0005622 // intracellular // inferred from electronic annotation///0005634 // nucleus // traceable author statement///0005737 // cytoplasm // inferred from direct assay///0005886 // plasma membrane // inferred from direct assay///0016020 // membrane // inferred from electronic annotation///0030175 // filopodium // inferred from electronic annotation///0042995 // cell projection // inferred from el…	0000166 // nucleotide binding // inferred from electronic annotation///0003924 // GTPase activity // traceable author statement///0005515 // protein binding // inferred from physical interaction///0005525 // GTP binding // inferred from electronic annotation///0043014 // alpha-tubulin binding // inferred from direct assay	chr2:235401681-235405622 (-) // 95.42 // q37.1
214452_at	0.043256972	1.2042898	0.2681826	1.2042898	up	1.0934963	0.12894838	1.0934963	up	1.1262085	0.17147401	1.1262085	up	1.0935534	0.12902364	1.0935534	up	BCAT1	586	0000082 // G1/S transition of mitotic cell cycle // traceable author statement///0008152 // metabolic process // inferred from electronic annotation///0008283 // cell proliferation // traceable author statement///0008652 // cellular amino acid biosynthetic process // inferred from electronic annotation///0009081 // branched-chain amino acid metabolic process // inferred from electronic annotation…	0005737 // cytoplasm // inferred from electronic annotation///0005739 // mitochondrion // inferred from electronic annotation///0005829 // cytosol // traceable author statement	0003824 // catalytic activity // inferred from electronic annotation///0004084 // branched-chain-amino-acid transaminase activity // not recorded///0008483 // transaminase activity // inferred from electronic annotation///0016740 // transferase activity // inferred from electronic annotation///0042802 // identical protein binding // inferred from electronic annotation///0052654 // L-leucine trans…	chr12:24970555-25102096 (-) // 99.83 // p12.1
202208_s_at	0.002539606	1.1950219	0.25703698	1.1950219	up	1.4126359	0.49838972	1.4126359	up	1.5646636	0.6458525	1.5646636	up	1.7441447	0.80251974	1.7441447	up	ARL4C	10123	0006810 // transport // inferred from electronic annotation///0006886 // intracellular protein transport // inferred from electronic annotation///0007264 // small GTPase mediated signal transduction // inferred from electronic annotation///0008152 // metabolic process // traceable author statement///0015031 // protein transport // inferred from electronic annotation///0032456 // endocytic recycli…	0005622 // intracellular // inferred from electronic annotation///0005634 // nucleus // traceable author statement///0005737 // cytoplasm // inferred from direct assay///0005886 // plasma membrane // inferred from direct assay///0016020 // membrane // inferred from electronic annotation///0030175 // filopodium // inferred from electronic annotation///0042995 // cell projection // inferred from el…	0000166 // nucleotide binding // inferred from electronic annotation///0003924 // GTPase activity // traceable author statement///0005515 // protein binding // inferred from physical interaction///0005525 // GTP binding // inferred from electronic annotation///0043014 // alpha-tubulin binding // inferred from direct assay	chr2:235403805-235405204 (-) // 94.67 // q37.1
221331_x_at	0.0022345686	1.1905469	0.2516244	1.1905469	up	1.2614949	0.3351344	1.2614949	up	1.4273754	0.5133648	1.4273754	up	1.1375438	0.18592207	1.1375438	up	CTLA4	1493	0002250 // adaptive immune response // inferred from electronic annotation///0002376 // immune system process // inferred from electronic annotation///0006955 // immune response // traceable author statement///0006974 // cellular response to DNA damage stimulus // inferred from mutant phenotype///0030889 // negative regulation of B cell proliferation // inferred from mutant phenotype///0031295 //…	0005794 // Golgi apparatus // inferred from direct assay///0005886 // plasma membrane // traceable author statement///0005887 // integral component of plasma membrane // traceable author statement///0009897 // external side of plasma membrane // inferred from direct assay///0016020 // membrane // inferred from electronic annotation///0016021 // integral component of membrane // inferred from elec…	0005515 // protein binding // inferred from physical interaction	chr2:204732665-204737535 (+) // 99.7 // q33.2
217507_at	4.1775453E-5	1.1865101	0.24672443	1.1865101	up	1.0611039	0.08556603	1.0611039	up	1.1420833	0.19166791	1.1420833	up	1.6582242	0.72963905	1.6582242	up	SLC11A1	6556	0000060 // protein import into nucleus, translocation // inferred from electronic annotation///0001818 // negative regulation of cytokine production // inferred from sequence or structural similarity///0001819 // positive regulation of cytokine production // inferred from sequence or structural similarity///0002309 // T cell proliferation involved in immune response // inferred from sequence or s…	0005764 // lysosome // inferred from sequence or structural similarity///0005770 // late endosome // inferred from sequence or structural similarity///0005886 // plasma membrane // inferred from mutant phenotype///0005887 // integral component of plasma membrane // non-traceable author statement///0009279 // cell outer membrane // inferred from electronic annotation///0010008 // endosome membrane…	0005215 // transporter activity // inferred from electronic annotation///0005384 // manganese ion transmembrane transporter activity // inferred from sequence or structural similarity///0042803 // protein homodimerization activity // inferred from direct assay///0046915 // transition metal ion transmembrane transporter activity // inferred from genetic interaction///0051139 // metal ion:proton an…	chr2:219260269-219260758 (+) // 58.08 // q35
213449_at	1.8214039E-4	1.1862015	0.2463491	1.1862015	up	1.6382233	0.71213204	1.6382233	up	1.0601099	0.08421381	1.0601099	up	1.4083155	0.49397057	1.4083155	up	POP1	10940	0001682 // tRNA 5'-leader removal // inferred from electronic annotation///0006396 // RNA processing // inferred from electronic annotation///0008033 // tRNA processing // not recorded///0008033 // tRNA processing // traceable author statement///0010467 // gene expression // traceable author statement///0016078 // tRNA catabolic process // inferred from direct assay///0090501 // RNA phosphodieste…	0000172 // ribonuclease MRP complex // inferred from direct assay///0005615 // extracellular space // inferred from direct assay///0005634 // nucleus // inferred from electronic annotation///0005654 // nucleoplasm // traceable author statement///0005655 // nucleolar ribonuclease P complex // inferred from direct assay///0005730 // nucleolus // inferred from electronic annotation	0000171 // ribonuclease MRP activity // inferred from direct assay///0004526 // ribonuclease P activity // inferred from direct assay///0005515 // protein binding // inferred from physical interaction///0016787 // hydrolase activity // inferred from electronic annotation///0044822 // poly(A) RNA binding // inferred from direct assay	chr8:99129542-99172063 (+) // 92.34 // q22.2
204924_at	0.0013447235	1.1824707	0.24180439	1.1824707	up	1.1502129	0.20190085	1.1502129	up	1.4855255	0.57097334	1.4855255	up	2.118841	1.0832753	2.118841	up	TLR2	7097	0001666 // response to hypoxia // inferred from electronic annotation///0001774 // microglial cell activation // inferred from electronic annotation///0002224 // toll-like receptor signaling pathway // traceable author statement///0002237 // response to molecule of bacterial origin // inferred from electronic annotation///0002238 // response to molecule of fungal origin // inferred from electroni…	0005737 // cytoplasm // inferred from direct assay///0005794 // Golgi apparatus // inferred from direct assay///0005886 // plasma membrane // inferred from direct assay///0005886 // plasma membrane // traceable author statement///0005887 // integral component of plasma membrane // traceable author statement///0009897 // external side of plasma membrane // inferred from electronic annotation///000…	0001530 // lipopolysaccharide binding // inferred from direct assay///0001875 // lipopolysaccharide receptor activity // traceable author statement///0004872 // receptor activity // inferred from direct assay///0004888 // transmembrane signaling receptor activity // inferred from electronic annotation///0005515 // protein binding // inferred from physical interaction///0008329 // signaling patter…	chr4:154624037-154626530 (+) // 95.77 // q31.3
219257_s_at	6.2346226E-9	1.1770128	0.23512998	1.1770128	up	1.348362	0.43120787	1.348362	up	1.7540687	0.81070524	1.7540687	up	2.6261566	1.3929529	2.6261566	up	SPHK1	8877	0001568 // blood vessel development // inferred from electronic annotation///0001934 // positive regulation of protein phosphorylation // inferred from electronic annotation///0001956 // positive regulation of neurotransmitter secretion // inferred from electronic annotation///0003376 // sphingosine-1-phosphate signaling pathway // inferred from mutant phenotype///0006457 // protein folding // tr…	0005634 // nucleus // inferred from electronic annotation///0005737 // cytoplasm // inferred from direct assay///0005829 // cytosol // traceable author statement///0005886 // plasma membrane // inferred from direct assay///0008021 // synaptic vesicle // inferred from electronic annotation///0016020 // membrane // inferred from electronic annotation///0030424 // axon // inferred from electronic an…	0000166 // nucleotide binding // inferred from electronic annotation///0000287 // magnesium ion binding // inferred from direct assay///0000287 // magnesium ion binding // inferred from sequence or structural similarity///0003677 // DNA binding // inferred from direct assay///0005515 // protein binding // inferred from physical interaction///0005516 // calmodulin binding // inferred from direct a…	chr17:74380745-74383941 (+) // 98.49 // q25.1
217272_s_at	0.022197332	1.170068	0.22659239	1.170068	up	1.0740603	0.103075	1.0740603	up	1.039902	0.05644748	1.039902	up	1.1743001	0.23180111	1.1743001	up	SERPINB13	5275	0009411 // response to UV // traceable author statement///0010466 // negative regulation of peptidase activity // inferred from electronic annotation///0010951 // negative regulation of endopeptidase activity // inferred from direct assay///0030162 // regulation of proteolysis // non-traceable author statement///1902173 // negative regulation of keratinocyte apoptotic process // inferred from mut…	0005615 // extracellular space // not recorded///0005654 // nucleoplasm // inferred from direct assay///0005730 // nucleolus // inferred from direct assay///0005737 // cytoplasm // inferred from direct assay///0016020 // membrane // inferred from electronic annotation///0016021 // integral component of membrane // inferred from electronic annotation///0070062 // extracellular exosome // inferred …	0002020 // protease binding // inferred from physical interaction///0004867 // serine-type endopeptidase inhibitor activity // inferred from direct assay///0004867 // serine-type endopeptidase inhibitor activity // non-traceable author statement///0004869 // cysteine-type endopeptidase inhibitor activity // inferred from direct assay///0004869 // cysteine-type endopeptidase inhibitor activity // …	chr18:61255882-61265976 (+) // 77.5 // q21.33
213201_s_at	2.3109168E-4	1.1666617	0.22238636	1.1666617	up	1.0208464	0.029765844	1.0208464	up	1.1311215	0.17775385	1.1311215	up	1.4560367	0.54204667	1.4560367	up	TNNT1	7138	0003009 // skeletal muscle contraction // inferred from mutant phenotype///0006937 // regulation of muscle contraction // inferred from electronic annotation///0014883 // transition between fast and slow fiber // inferred from electronic annotation///0030049 // muscle filament sliding // traceable author statement///0031444 // slow-twitch skeletal muscle fiber contraction // inferred from electro…	0005829 // cytosol // traceable author statement///0005861 // troponin complex // inferred from direct assay///0005861 // troponin complex // inferred from mutant phenotype	0005515 // protein binding // inferred from physical interaction///0005523 // tropomyosin binding // inferred from mutant phenotype///0031014 // troponin T binding // inferred from electronic annotation	chr19:55644198-55660574 (-) // 85.04 // q13.42
214467_at	0.0015815622	1.165292	0.22069147	1.165292	up	1.094122	0.12977374	1.094122	up	1.4205946	0.5064948	1.4205946	up	1.1774861	0.23570994	1.1774861	up	GPR65	8477	0006915 // apoptotic process // inferred from electronic annotation///0006955 // immune response // traceable author statement///0007165 // signal transduction // inferred from electronic annotation///0007186 // G-protein coupled receptor signaling pathway // inferred from direct assay///0007275 // multicellular organismal development // traceable author statement///0010447 // response to acidic …	0005886 // plasma membrane // inferred from direct assay///0005886 // plasma membrane // traceable author statement///0005887 // integral component of plasma membrane // traceable author statement///0016020 // membrane // inferred from electronic annotation///0016021 // integral component of membrane // inferred from electronic annotation	0004871 // signal transducer activity // inferred from electronic annotation///0004930 // G-protein coupled receptor activity // inferred from direct assay	chr14:88477191-88478419 (+) // 91.3 // q31.3
220962_s_at	0.0060251947	1.1649051	0.22021243	1.1649051	up	1.0245535	0.034995355	1.0245535	up	-1.0424099	-0.05992274	1.0424099	down	1.1800998	0.23890892	1.1800998	up	PADI1	29943	0018101 // protein citrullination // inferred from electronic annotation	0005737 // cytoplasm // inferred from electronic annotation///0070062 // extracellular exosome // inferred from direct assay	0004668 // protein-arginine deiminase activity // inferred from electronic annotation///0005509 // calcium ion binding // inferred from electronic annotation///0016787 // hydrolase activity // inferred from electronic annotation	chr1:17531629-17571348 (+) // 98.86 // p36.13
220446_s_at	0.008066959	1.1566216	0.20991693	1.1566216	up	1.2436442	0.3145738	1.2436442	up	1.0842935	0.11675535	1.0842935	up	1.1465826	0.19734028	1.1465826	up	CHST4	10164	0005975 // carbohydrate metabolic process // inferred from electronic annotation///0006044 // N-acetylglucosamine metabolic process // inferred from direct assay///0006477 // protein sulfation // traceable author statement///0006790 // sulfur compound metabolic process // inferred from direct assay///0006928 // movement of cell or subcellular component // traceable author statement///0006954 // i…	0000139 // Golgi membrane // not recorded///0005794 // Golgi apparatus // inferred from electronic annotation///0005802 // trans-Golgi network // inferred from direct assay///0016020 // membrane // inferred from electronic annotation///0016021 // integral component of membrane // not recorded///0031228 // intrinsic component of Golgi membrane // non-traceable author statement	0001517 // N-acetylglucosamine 6-O-sulfotransferase activity // inferred from direct assay///0008146 // sulfotransferase activity // traceable author statement///0016740 // transferase activity // inferred from electronic annotation	chr16:71560060-71572416 (+) // 98.82 // q22.2
209219_at	0.025794908	1.1564896	0.20975226	1.1564896	up	1.4122461	0.49799156	1.4122461	up	1.0473604	0.066758014	1.0473604	up	1.0379028	0.05367142	1.0379028	up	NELFE	7936	0000122 // negative regulation of transcription from RNA polymerase II promoter // inferred from electronic annotation///0006351 // transcription, DNA-templated // inferred from electronic annotation///0006355 // regulation of transcription, DNA-templated // inferred from electronic annotation///0006366 // transcription from RNA polymerase II promoter // traceable author statement///0006368 // tr…	0005634 // nucleus // non-traceable author statement///0005654 // nucleoplasm // inferred from direct assay///0005654 // nucleoplasm // traceable author statement///0005739 // mitochondrion // inferred from direct assay///0032021 // NELF complex // inferred from direct assay	0000166 // nucleotide binding // inferred from electronic annotation///0003676 // nucleic acid binding // inferred from electronic annotation///0003682 // chromatin binding // inferred from electronic annotation///0003723 // RNA binding // non-traceable author statement///0003746 // translation elongation factor activity // inferred from electronic annotation///0005515 // protein binding // infer…	chr6:31920005-31926746 (-) // 88.24 // p21.33
219095_at	0.035432644	1.153005	0.20539874	1.153005	up	1.0542135	0.07616714	1.0542135	up	1.1406722	0.1898843	1.1406722	up	1.3287938	0.41011718	1.3287938	up	JMJD7-PLA2G4B///PLA2G4B	8681///100137049	0006629 // lipid metabolic process // inferred from electronic annotation///0006644 // phospholipid metabolic process // traceable author statement///0006654 // phosphatidic acid biosynthetic process // traceable author statement///0006954 // inflammatory response // non-traceable author statement///0007567 // parturition // non-traceable author statement///0008152 // metabolic process // inferre…	0005576 // extracellular region // traceable author statement///0005737 // cytoplasm // inferred from electronic annotation///0005739 // mitochondrion // inferred from electronic annotation///0005743 // mitochondrial inner membrane // traceable author statement///0005768 // endosome // inferred from electronic annotation///0005829 // cytosol // inferred from direct assay///0005829 // cytosol // t…	0004620 // phospholipase activity // inferred from electronic annotation///0004622 // lysophospholipase activity // non-traceable author statement///0004623 // phospholipase A2 activity // inferred from electronic annotation///0005509 // calcium ion binding // non-traceable author statement///0005515 // protein binding // inferred from physical interaction///0005515 // protein binding // inferred…	chr15:42120313-42140338 (+) // 99.22 // q15.1
209732_at	0.012526433	1.1525742	0.2048596	1.1525742	up	-1.45917	-0.545148	1.45917	down	1.5316484	0.6150851	1.5316484	up	1.3421105	0.42450348	1.3421105	up	CLEC2B	9976	0050776 // regulation of immune response // traceable author statement	0005886 // plasma membrane // traceable author statement///0005887 // integral component of plasma membrane // traceable author statement///0016020 // membrane // inferred from electronic annotation///0016021 // integral component of membrane // inferred from electronic annotation	0030246 // carbohydrate binding // inferred from electronic annotation	chr12:10005804-10021952 (-) // 96.79 // p13.31
206345_s_at	0.014463093	1.1514311	0.20342804	1.1514311	up	1.0955129	0.1316064	1.0955129	up	1.0336599	0.047761656	1.0336599	up	1.3620021	0.44572896	1.3620021	up	PON1	5444	0006470 // protein dephosphorylation // inferred from electronic annotation///0006629 // lipid metabolic process // inferred from electronic annotation///0009605 // response to external stimulus // non-traceable author statement///0009636 // response to toxic substance // not recorded///0010875 // positive regulation of cholesterol efflux // inferred from direct assay///0016311 // dephosphorylati…	0005576 // extracellular region // non-traceable author statement///0005615 // extracellular space // inferred from direct assay///0034364 // high-density lipoprotein particle // inferred from direct assay///0034364 // high-density lipoprotein particle // traceable author statement///0034366 // spherical high-density lipoprotein particle // inferred from direct assay///0043231 // intracellular me…	0004063 // aryldialkylphosphatase activity // inferred from direct assay///0004064 // arylesterase activity // inferred from direct assay///0004064 // arylesterase activity // non-traceable author statement///0005509 // calcium ion binding // inferred from direct assay///0005543 // phospholipid binding // inferred from direct assay///0016787 // hydrolase activity // inferred from electronic annot…	chr7:94927995-94953795 (-) // 99.18 // q21.3
207096_at	0.014274062	1.1416594	0.19113229	1.1416594	up	1.068428	0.095489725	1.068428	up	1.2816046	0.35795128	1.2816046	up	1.0442269	0.062435254	1.0442269	up	SAA4	6291	0000187 // activation of MAPK activity // inferred from direct assay///0006898 // receptor-mediated endocytosis // traceable author statement///0006953 // acute-phase response // inferred from electronic annotation///0007204 // positive regulation of cytosolic calcium ion concentration // inferred from direct assay///0007204 // positive regulation of cytosolic calcium ion concentration // non-tra…	0005576 // extracellular region // non-traceable author statement///0005615 // extracellular space // not recorded///0005829 // cytosol // inferred from direct assay///0005829 // cytosol // non-traceable author statement///0005881 // cytoplasmic microtubule // inferred from direct assay///0034364 // high-density lipoprotein particle // inferred from electronic annotation///0070062 // extracellula…	0001664 // G-protein coupled receptor binding // inferred from direct assay///0008201 // heparin binding // inferred from electronic annotation///0042056 // chemoattractant activity // not recorded	chr11:18252902-18258334 (-) // 80.29 // p15.1
208068_x_at	3.959127E-4	1.1366144	0.18474288	1.1366144	up	1.1325659	0.179595	1.1325659	up	1.1143904	0.15625465	1.1143904	up	1.4918196	0.57707316	1.4918196	up	CSH1///CSHL1///GH1///GH2	1442///1444///2688///2689	0002092 // positive regulation of receptor internalization // inferred from direct assay///0007259 // JAK-STAT cascade // inferred from direct assay///0010535 // positive regulation of activation of JAK2 kinase activity // inferred from direct assay///0014068 // positive regulation of phosphatidylinositol 3-kinase signaling // inferred from direct assay///0015758 // glucose transport // inferred …	0005576 // extracellular region // traceable author statement///0005576 // extracellular region // inferred from electronic annotation///0005615 // extracellular space // inferred from direct assay///0005622 // intracellular // inferred from direct assay///0005622 // intracellular // traceable author statement///0005783 // endoplasmic reticulum // inferred from direct assay///0031988 // membrane-…	0005131 // growth hormone receptor binding // inferred from direct assay///0005131 // growth hormone receptor binding // inferred from physical interaction///0005148 // prolactin receptor binding // inferred from direct assay///0005148 // prolactin receptor binding // inferred from physical interaction///0005179 // hormone activity // inferred from electronic annotation///0005179 // hormone activ…	chr17:61994562-61996198 (-) // 99.73 // q23.3///chr17:61957574-61959223 (-) // 96.8 // q23.3
210182_at	0.022073222	1.1340998	0.18154772	1.1340998	up	1.0716102	0.099780254	1.0716102	up	1.0160124	0.02291806	1.0160124	up	1.4857037	0.5711464	1.4857037	up	CORT	1325	0000278 // mitotic cell cycle // traceable author statement///0000712 // resolution of meiotic recombination intermediates // inferred from mutant phenotype///0006281 // DNA repair // inferred from direct assay///0006281 // DNA repair // inferred from electronic annotation///0006281 // DNA repair // traceable author statement///0006334 // nucleosome assembly // traceable author statement///000697…	0000775 // chromosome, centromeric region // inferred from electronic annotation///0000776 // kinetochore // inferred from electronic annotation///0000777 // condensed chromosome kinetochore // inferred from electronic annotation///0005576 // extracellular region // inferred from electronic annotation///0005615 // extracellular space // non-traceable author statement///0005634 // nucleus // infer…	0001664 // G-protein coupled receptor binding // inferred from physical interaction///0003677 // DNA binding // inferred from direct assay///0003677 // DNA binding // inferred from electronic annotation///0003682 // chromatin binding // inferred from direct assay///0003690 // double-stranded DNA binding // inferred from direct assay///0005179 // hormone activity // inferred from electronic annota…	chr1:10510275-10511697 (+) // 98.91 // p36.22
213277_at	0.01080234	1.1280776	0.17386632	1.1280776	up	-1.1004825	-0.1381361	1.1004825	down	-1.0622976	-0.087188035	1.0622976	down	1.5271127	0.6108066	1.5271127	up	ZFP36L1	677	0000288 // nuclear-transcribed mRNA catabolic process, deadenylation-dependent decay // inferred from electronic annotation///0001570 // vasculogenesis // inferred from electronic annotation///0003342 // proepicardium development // inferred from electronic annotation///0006355 // regulation of transcription, DNA-templated // non-traceable author statement///0006402 // mRNA catabolic process // i…	0005634 // nucleus // inferred from electronic annotation///0005737 // cytoplasm // inferred from electronic annotation///0005829 // cytosol // traceable author statement	0003677 // DNA binding // inferred from electronic annotation///0003700 // transcription factor activity, sequence-specific DNA binding // non-traceable author statement///0003729 // mRNA binding // inferred from direct assay///0005515 // protein binding // inferred from physical interaction///0017091 // AU-rich element binding // inferred from electronic annotation///0044822 // poly(A) RNA bindi…	chr14:69254634-69261453 (-) // 92.76 // q24.1
211839_s_at	0.026979003	1.1232548	0.16768515	1.1232548	up	1.0180461	0.025802888	1.0180461	up	1.0056908	0.008186774	1.0056908	up	1.3717586	0.45602658	1.3717586	up	CSF1	1435	0001503 // ossification // inferred from electronic annotation///0001954 // positive regulation of cell-matrix adhesion // inferred from sequence or structural similarity///0002158 // osteoclast proliferation // inferred from electronic annotation///0002376 // immune system process // inferred from electronic annotation///0003006 // developmental process involved in reproduction // inferred from …	0005576 // extracellular region // inferred from electronic annotation///0005615 // extracellular space // inferred from direct assay///0005886 // plasma membrane // inferred from electronic annotation///0016020 // membrane // non-traceable author statement///0016021 // integral component of membrane // inferred from electronic annotation///0043235 // receptor complex // inferred from electronic …	0005125 // cytokine activity // inferred from direct assay///0005157 // macrophage colony-stimulating factor receptor binding // inferred from sequence or structural similarity///0005157 // macrophage colony-stimulating factor receptor binding // traceable author statement///0005515 // protein binding // inferred from physical interaction///0008083 // growth factor activity // inferred from direc…	chr1:110453607-110467820 (+) // 97.66 // p13.3
213769_at	5.1426665E-5	1.1227765	0.16707075	1.1227765	up	1.0338941	0.048088424	1.0338941	up	1.1235409	0.16805255	1.1235409	up	1.5541092	0.6360879	1.5541092	up	KSR1	8844	0000165 // MAPK cascade // traceable author statement///0000186 // activation of MAPKK activity // traceable author statement///0006468 // protein phosphorylation // inferred from electronic annotation///0007173 // epidermal growth factor receptor signaling pathway // traceable author statement///0007264 // small GTPase mediated signal transduction // traceable author statement///0007265 // Ras p…	0005622 // intracellular // inferred from electronic annotation///0005737 // cytoplasm // inferred from electronic annotation///0005783 // endoplasmic reticulum // inferred from direct assay///0005789 // endoplasmic reticulum membrane // inferred from electronic annotation///0005829 // cytosol // traceable author statement///0016020 // membrane // inferred from direct assay///0043234 // protein c…	0004672 // protein kinase activity // non-traceable author statement///0004697 // protein kinase C activity // inferred from electronic annotation///0005078 // MAP-kinase scaffold activity // inferred from electronic annotation///0005515 // protein binding // inferred from physical interaction///0005524 // ATP binding // inferred from electronic annotation///0008022 // protein C-terminus binding …	chr17:25909945-25949170 (+) // 96.24 // q11.2
206049_at	2.3384244E-4	1.1226982	0.16697018	1.1226982	up	1.164836	0.22012694	1.164836	up	1.8389175	0.8788568	1.8389175	up	-1.0544358	-0.0764714	1.0544358	down	SELP	6403	0002576 // platelet degranulation // traceable author statement///0002687 // positive regulation of leukocyte migration // inferred from electronic annotation///0002691 // regulation of cellular extravasation // inferred from electronic annotation///0006954 // inflammatory response // inferred from electronic annotation///0007155 // cell adhesion // traceable author statement///0007157 // heterop…	0005615 // extracellular space // inferred from direct assay///0005654 // nucleoplasm // inferred from direct assay///0005737 // cytoplasm // inferred from direct assay///0005886 // plasma membrane // traceable author statement///0005887 // integral component of plasma membrane // traceable author statement///0009897 // external side of plasma membrane // inferred from direct assay///0016020 // m…	0001530 // lipopolysaccharide binding // inferred from mutant phenotype///0001948 // glycoprotein binding // inferred from electronic annotation///0005515 // protein binding // inferred from physical interaction///0008201 // heparin binding // inferred from direct assay///0030246 // carbohydrate binding // inferred from electronic annotation///0033691 // sialic acid binding // inferred from direc…	chr1:169558089-169599407 (-) // 99.78 // q24.2
220632_s_at	0.027708417	1.1214193	0.1653258	1.1214193	up	-1.0807104	-0.11197992	1.0807104	down	-1.009817	-0.014093868	1.009817	down	1.3278697	0.4091135	1.3278697	up	POMT2	29954	0000032 // cell wall mannoprotein biosynthetic process // not recorded///0006486 // protein glycosylation // inferred from electronic annotation///0006493 // protein O-linked glycosylation // inferred from electronic annotation///0007275 // multicellular organismal development // not recorded///0035269 // protein O-linked mannosylation // not recorded///0044845 // chain elongation of O-linked man…	0005783 // endoplasmic reticulum // inferred from electronic annotation///0005789 // endoplasmic reticulum membrane // inferred from electronic annotation///0016020 // membrane // inferred from electronic annotation///0016021 // integral component of membrane // inferred from electronic annotation///0031502 // dolichyl-phosphate-mannose-protein mannosyltransferase complex // not recorded	0000030 // mannosyltransferase activity // inferred from electronic annotation///0004169 // dolichyl-phosphate-mannose-protein mannosyltransferase activity // not recorded///0016740 // transferase activity // inferred from electronic annotation///0016757 // transferase activity, transferring glycosyl groups // inferred from electronic annotation///0046872 // metal ion binding // inferred from ele…	chr14:77743313-77787217 (-) // 97.52 // q24.3
206026_s_at	5.0599218E-5	1.1181124	0.16106528	1.1181124	up	1.4184649	0.5043304	1.4184649	up	2.0032701	1.002357	2.0032701	up	2.8308825	1.5012519	2.8308825	up	TNFAIP6	7130	0006954 // inflammatory response // traceable author statement///0007155 // cell adhesion // inferred from electronic annotation///0007165 // signal transduction // traceable author statement///0007267 // cell-cell signaling // traceable author statement///0030335 // positive regulation of cell migration // inferred from electronic annotation///0030728 // ovulation // inferred from electronic ann…	0005615 // extracellular space // inferred from electronic annotation	0005540 // hyaluronic acid binding // inferred from electronic annotation	chr2:152214119-152236553 (+) // 69.45 // q23.3
202637_s_at	0.038660575	1.1179968	0.16091609	1.1179968	up	1.580144	0.6600561	1.580144	up	1.9200078	0.94111216	1.9200078	up	1.5250816	0.6088865	1.5250816	up	ICAM1	3383	0001541 // ovarian follicle development // inferred from electronic annotation///0001666 // response to hypoxia // inferred from electronic annotation///0001910 // regulation of leukocyte mediated cytotoxicity // traceable author statement///0001975 // response to amphetamine // inferred from electronic annotation///0002291 // T cell activation via T cell receptor contact with antigen bound to MH…	0001772 // immunological synapse // inferred from electronic annotation///0005615 // extracellular space // inferred from direct assay///0005886 // plasma membrane // traceable author statement///0005887 // integral component of plasma membrane // traceable author statement///0005925 // focal adhesion // inferred from direct assay///0009897 // external side of plasma membrane // inferred from ele…	0001618 // virus receptor activity // inferred from electronic annotation///0004872 // receptor activity // traceable author statement///0004888 // transmembrane signaling receptor activity // traceable author statement///0005178 // integrin binding // inferred from direct assay///0005178 // integrin binding // inferred from physical interaction///0005515 // protein binding // inferred from physi…	chr19:10381763-10397290 (+) // 83.34 // p13.2
211266_s_at	0.009557634	1.1176559	0.16047612	1.1176559	up	1.0349214	0.049521193	1.0349214	up	1.1944695	0.2563699	1.1944695	up	1.5571431	0.6389015	1.5571431	up	GPR4	2828	0007165 // signal transduction // inferred from electronic annotation///0007186 // G-protein coupled receptor signaling pathway // inferred from electronic annotation	0005886 // plasma membrane // traceable author statement///0005887 // integral component of plasma membrane // traceable author statement///0016020 // membrane // inferred from electronic annotation///0016021 // integral component of membrane // inferred from electronic annotation	0004871 // signal transducer activity // inferred from electronic annotation///0004930 // G-protein coupled receptor activity // inferred from electronic annotation	chr19:46093998-46095319 (-) // 93.26 // q13.32
220322_at	0.010566481	1.1101749	0.1507869	1.1101749	up	1.0782301	0.10866507	1.0782301	up	-1.0464871	-0.06555458	1.0464871	down	1.1763966	0.2343745	1.1763966	up	IL36G	56300	0001819 // positive regulation of cytokine production // inferred from electronic annotation///0002376 // immune system process // inferred from electronic annotation///0002437 // inflammatory response to antigenic stimulus // ---///0006954 // inflammatory response // inferred from electronic annotation///0006955 // immune response // inferred from electronic annotation///0007267 // cell-cell sig…	0005576 // extracellular region // inferred from electronic annotation///0005615 // extracellular space // not recorded	0005125 // cytokine activity // not recorded///0005149 // interleukin-1 receptor binding // not recorded	chr2:113735605-113743207 (+) // 88.0 // q13
207538_at	0.014758515	1.1084081	0.14848918	1.1084081	up	1.0667354	0.09320231	1.0667354	up	1.010589	0.015196305	1.010589	up	1.4128369	0.49859497	1.4128369	up	IL4	3565	0001774 // microglial cell activation // inferred from electronic annotation///0001934 // positive regulation of protein phosphorylation // inferred from electronic annotation///0002227 // innate immune response in mucosa // inferred from electronic annotation///0002230 // positive regulation of defense response to virus by host // inferred from electronic annotation///0002296 // T-helper 1 cell …	0005576 // extracellular region // inferred from electronic annotation///0005615 // extracellular space // traceable author statement///0009897 // external side of plasma membrane // inferred from electronic annotation	0005125 // cytokine activity // not recorded///0005126 // cytokine receptor binding // inferred from electronic annotation///0005136 // interleukin-4 receptor binding // traceable author statement///0005515 // protein binding // inferred from physical interaction///0008083 // growth factor activity // non-traceable author statement	chr5:132009677-132018370 (+) // 95.15 // q31.1
206885_x_at	0.024327694	1.1017364	0.13977906	1.1017364	up	1.0649676	0.09080964	1.0649676	up	1.1183821	0.16141316	1.1183821	up	1.2711405	0.3461234	1.2711405	up	GH1	2688	0002092 // positive regulation of receptor internalization // inferred from direct assay///0007259 // JAK-STAT cascade // inferred from direct assay///0010535 // positive regulation of activation of JAK2 kinase activity // inferred from direct assay///0014068 // positive regulation of phosphatidylinositol 3-kinase signaling // inferred from direct assay///0015758 // glucose transport // inferred …	0005576 // extracellular region // traceable author statement///0005615 // extracellular space // inferred from direct assay///0005622 // intracellular // inferred from direct assay///0005622 // intracellular // traceable author statement	0005131 // growth hormone receptor binding // inferred from direct assay///0005131 // growth hormone receptor binding // inferred from physical interaction///0005148 // prolactin receptor binding // inferred from direct assay///0005148 // prolactin receptor binding // inferred from physical interaction///0005179 // hormone activity // inferred from electronic annotation///0005515 // protein bindi…	chr17:61994562-61996198 (-) // 99.87 // q23.3
207015_s_at	0.036084622	1.1001072	0.1376441	1.1001072	up	-1.0198816	-0.028401688	1.0198816	down	-1.0698266	-0.097377	1.0698266	down	1.2906357	0.36808178	1.2906357	up	ALDH1A2	8854	0001568 // blood vessel development // inferred from electronic annotation///0001822 // kidney development // inferred from electronic annotation///0001889 // liver development // inferred from electronic annotation///0001936 // regulation of endothelial cell proliferation // inferred from electronic annotation///0002138 // retinoic acid biosynthetic process // inferred from electronic annotation…	0005737 // cytoplasm // inferred from direct assay///0005829 // cytosol // traceable author statement///0048471 // perinuclear region of cytoplasm // inferred from electronic annotation	0001758 // retinal dehydrogenase activity // not recorded///0001758 // retinal dehydrogenase activity // inferred from sequence or structural similarity///0004028 // 3-chloroallyl aldehyde dehydrogenase activity // not recorded///0004028 // 3-chloroallyl aldehyde dehydrogenase activity // inferred from sequence or structural similarity///0004029 // aldehyde dehydrogenase (NAD) activity // not rec…	chr15:58247364-58357891 (-) // 99.94 // q21.3
211440_x_at	0.03334449	1.099995	0.13749705	1.099995	up	1.1366204	0.18475057	1.1366204	up	1.0099417	0.014272075	1.0099417	up	1.1718013	0.22872792	1.1718013	up	CYP3A43	64816	0006805 // xenobiotic metabolic process // traceable author statement///0044281 // small molecule metabolic process // traceable author statement///0055114 // oxidation-reduction process // inferred from electronic annotation	0005783 // endoplasmic reticulum // inferred from electronic annotation///0005789 // endoplasmic reticulum membrane // traceable author statement///0016020 // membrane // inferred from electronic annotation///0016021 // integral component of membrane // inferred from electronic annotation///0031090 // organelle membrane // inferred from electronic annotation///0043231 // intracellular membrane-bo…	0004497 // monooxygenase activity // inferred from sequence or structural similarity///0005506 // iron ion binding // inferred from electronic annotation///0016491 // oxidoreductase activity // inferred from electronic annotation///0016705 // oxidoreductase activity, acting on paired donors, with incorporation or reduction of molecular oxygen // inferred from electronic annotation///0016712 // ox…	chr7:99425738-99463624 (+) // 99.85 // q22.1
221389_at	0.035343755	1.0991137	0.13634063	1.0991137	up	1.1122504	0.15348175	1.1122504	up	1.0843827	0.11687392	1.0843827	up	1.2103372	0.27540892	1.2103372	up	PLA2G2E	30814	0006629 // lipid metabolic process // inferred from electronic annotation///0006644 // phospholipid metabolic process // traceable author statement///0006654 // phosphatidic acid biosynthetic process // traceable author statement///0006954 // inflammatory response // traceable author statement///0016042 // lipid catabolic process // inferred from electronic annotation///0036148 // phosphatidylgly…	0005576 // extracellular region // traceable author statement	0004623 // phospholipase A2 activity // inferred from electronic annotation///0005509 // calcium ion binding // inferred from electronic annotation///0016787 // hydrolase activity // inferred from electronic annotation///0046872 // metal ion binding // inferred from electronic annotation	chr1:20246799-20250110 (-) // 99.79 // p36.13
208069_x_at	0.028315809	1.0983875	0.13538706	1.0983875	up	1.1847682	0.24460483	1.1847682	up	1.0857936	0.11874986	1.0857936	up	1.2985818	0.37693694	1.2985818	up	CSH1///CSHL1///GH1///GH2	1442///1444///2688///2689	0002092 // positive regulation of receptor internalization // inferred from direct assay///0007259 // JAK-STAT cascade // inferred from direct assay///0010535 // positive regulation of activation of JAK2 kinase activity // inferred from direct assay///0014068 // positive regulation of phosphatidylinositol 3-kinase signaling // inferred from direct assay///0015758 // glucose transport // inferred …	0005576 // extracellular region // traceable author statement///0005576 // extracellular region // inferred from electronic annotation///0005615 // extracellular space // inferred from direct assay///0005622 // intracellular // inferred from direct assay///0005622 // intracellular // traceable author statement///0005783 // endoplasmic reticulum // inferred from direct assay///0031988 // membrane-…	0005131 // growth hormone receptor binding // inferred from direct assay///0005131 // growth hormone receptor binding // inferred from physical interaction///0005148 // prolactin receptor binding // inferred from direct assay///0005148 // prolactin receptor binding // inferred from physical interaction///0005179 // hormone activity // inferred from electronic annotation///0005179 // hormone activ…	chr17:61994562-61996198 (-) // 99.81 // q23.3///chr17:61957574-61959223 (-) // 96.46 // q23.3
210569_s_at	0.030645879	1.0965413	0.13296016	1.0965413	up	1.0526886	0.07407868	1.0526886	up	1.1399379	0.18895526	1.1399379	up	1.3816712	0.46641427	1.3816712	up	SIGLEC9	27180	0007155 // cell adhesion // inferred from electronic annotation///0007166 // cell surface receptor signaling pathway // non-traceable author statement///0050776 // regulation of immune response // traceable author statement	0005886 // plasma membrane // traceable author statement///0005887 // integral component of plasma membrane // non-traceable author statement///0016020 // membrane // inferred from electronic annotation///0016021 // integral component of membrane // inferred from electronic annotation	0005515 // protein binding // inferred from electronic annotation///0030246 // carbohydrate binding // non-traceable author statement	chr19:51628220-51633455 (+) // 99.87 // q13.41
208183_at	0.032528777	1.0910388	0.12570246	1.0910388	up	1.1067386	0.14631441	1.1067386	up	-1.0134752	-0.019310676	1.0134752	down	1.4072319	0.4928601	1.4072319	up	TACR3	6870	0007165 // signal transduction // inferred from electronic annotation///0007186 // G-protein coupled receptor signaling pathway // inferred from electronic annotation///0007217 // tachykinin receptor signaling pathway // traceable author statement///0007568 // aging // inferred from electronic annotation///0010460 // positive regulation of heart rate // inferred from electronic annotation///00323…	0005634 // nucleus // inferred from electronic annotation///0005737 // cytoplasm // inferred from electronic annotation///0005886 // plasma membrane // traceable author statement///0005887 // integral component of plasma membrane // traceable author statement///0016020 // membrane // inferred from electronic annotation///0016021 // integral component of membrane // inferred from electronic annota…	0004871 // signal transducer activity // inferred from electronic annotation///0004930 // G-protein coupled receptor activity // inferred from electronic annotation///0004995 // tachykinin receptor activity // inferred from electronic annotation///0005515 // protein binding // inferred from physical interaction	chr4:104510624-104640973 (-) // 99.77 // q24
214556_at	0.009344313	1.0875437	0.121073455	1.0875437	up	1.022248	0.031745292	1.022248	up	-1.03719	-0.0526802	1.03719	down	1.2437072	0.3146469	1.2437072	up	SSTR4	6754	0007165 // signal transduction // inferred from electronic annotation///0007186 // G-protein coupled receptor signaling pathway // traceable author statement///0007187 // G-protein coupled receptor signaling pathway, coupled to cyclic nucleotide second messenger // traceable author statement///0007218 // neuropeptide signaling pathway // not recorded///0007268 // synaptic transmission // not reco…	0005737 // cytoplasm // inferred from electronic annotation///0005886 // plasma membrane // traceable author statement///0005887 // integral component of plasma membrane // traceable author statement///0016020 // membrane // inferred from electronic annotation///0016021 // integral component of membrane // inferred from electronic annotation///0043005 // neuron projection // not recorded	0004871 // signal transducer activity // inferred from electronic annotation///0004930 // G-protein coupled receptor activity // inferred from electronic annotation///0004994 // somatostatin receptor activity // inferred from electronic annotation///0042923 // neuropeptide binding // not recorded	chr20:23016022-23017449 (+) // 97.55 // p11.21
211362_s_at	0.04410128	1.0748339	0.10411362	1.0748339	up	1.0661112	0.09235786	1.0661112	up	-1.2046806	-0.26865065	1.2046806	down	1.1245402	0.16933519	1.1245402	up	SERPINB13	5275	0009411 // response to UV // traceable author statement///0010466 // negative regulation of peptidase activity // inferred from electronic annotation///0010951 // negative regulation of endopeptidase activity // inferred from direct assay///0030162 // regulation of proteolysis // non-traceable author statement///1902173 // negative regulation of keratinocyte apoptotic process // inferred from mut…	0005615 // extracellular space // not recorded///0005654 // nucleoplasm // inferred from direct assay///0005730 // nucleolus // inferred from direct assay///0005737 // cytoplasm // inferred from direct assay///0016020 // membrane // inferred from electronic annotation///0016021 // integral component of membrane // inferred from electronic annotation///0070062 // extracellular exosome // inferred …	0002020 // protease binding // inferred from physical interaction///0004867 // serine-type endopeptidase inhibitor activity // inferred from direct assay///0004867 // serine-type endopeptidase inhibitor activity // non-traceable author statement///0004869 // cysteine-type endopeptidase inhibitor activity // inferred from direct assay///0004869 // cysteine-type endopeptidase inhibitor activity // …	chr18:61255882-61264670 (+) // 98.91 // q21.33
210520_at	0.024866506	1.0728121	0.10139738	1.0728121	up	1.0342557	0.048593044	1.0342557	up	-1.0088001	-0.012640327	1.0088001	down	1.1879656	0.24849303	1.1879656	up	LOC105374258	105374258				chr3:186358148-186370797 (-) // 99.27 // q27.3
204158_s_at	0.023080518	1.0714284	0.09953554	1.0714284	up	1.0811956	0.112627506	1.0811956	up	1.6226805	0.69837904	1.6226805	up	2.04755	1.0338986	2.04755	up	TCIRG1	10312	0006810 // transport // inferred from electronic annotation///0006811 // ion transport // inferred from electronic annotation///0006879 // cellular iron ion homeostasis // traceable author statement///0006968 // cellular defense response // traceable author statement///0007035 // vacuolar acidification // not recorded///0008284 // positive regulation of cell proliferation // traceable author stat…	0000220 // vacuolar proton-transporting V-type ATPase, V0 domain // inferred from electronic annotation///0005739 // mitochondrion // inferred from electronic annotation///0005765 // lysosomal membrane // inferred from direct assay///0005886 // plasma membrane // traceable author statement///0005887 // integral component of plasma membrane // traceable author statement///0010008 // endosome membr…	0005215 // transporter activity // traceable author statement///0015078 // hydrogen ion transmembrane transporter activity // inferred from electronic annotation///0046961 // proton-transporting ATPase activity, rotational mechanism // not recorded///0051117 // ATPase binding // not recorded	chr11:67806529-67818361 (+) // 98.53 // q13.2
217072_at	0.02817044	1.0689352	0.096174374	1.0689352	up	1.0959904	0.13223526	1.0959904	up	-1.0521122	-0.07328859	1.0521122	down	1.1523833	0.20462063	1.1523833	up	CD300A	11314	0002376 // immune system process // inferred from electronic annotation///0007155 // cell adhesion // inferred from electronic annotation///0007165 // signal transduction // inferred from direct assay///0030889 // negative regulation of B cell proliferation // inferred from mutant phenotype///0032516 // positive regulation of phosphoprotein phosphatase activity // inferred from direct assay///003…	0005886 // plasma membrane // traceable author statement///0016020 // membrane // inferred from direct assay///0016021 // integral component of membrane // inferred from electronic annotation///0070062 // extracellular exosome // inferred from direct assay	0001786 // phosphatidylserine binding // inferred from direct assay///0005515 // protein binding // inferred from physical interaction///0008429 // phosphatidylethanolamine binding // inferred from direct assay///0038023 // signaling receptor activity // inferred from direct assay	chr17:72462796-72480931 (-) // 89.26 // q25.1
206211_at	0.02237052	1.0602893	0.08445785	1.0602893	up	1.0135235	0.019379536	1.0135235	up	1.9523389	0.9652035	1.9523389	up	1.023625	0.033687357	1.023625	up	SELE	6401	0002092 // positive regulation of receptor internalization // inferred from direct assay///0002523 // leukocyte migration involved in inflammatory response // traceable author statement///0002687 // positive regulation of leukocyte migration // inferred from electronic annotation///0006954 // inflammatory response // traceable author statement///0007155 // cell adhesion // inferred from electroni…	0005615 // extracellular space // inferred from direct assay///0005886 // plasma membrane // traceable author statement///0005901 // caveola // inferred from direct assay///0005905 // coated pit // inferred from direct assay///0016020 // membrane // inferred from electronic annotation///0016021 // integral component of membrane // inferred from electronic annotation///0030863 // cortical cytoskel…	0004888 // transmembrane signaling receptor activity // inferred from mutant phenotype///0005515 // protein binding // inferred from physical interaction///0030246 // carbohydrate binding // inferred from electronic annotation///0033691 // sialic acid binding // inferred from direct assay///0043274 // phospholipase binding // inferred from direct assay///0070492 // oligosaccharide binding // infe…	chr1:169691781-169703179 (-) // 98.41 // q24.2
210367_s_at	0.0033906817	1.0586715	0.082254976	1.0586715	up	1.4438683	0.5299391	1.4438683	up	1.1839873	0.24365355	1.1839873	up	1.3632089	0.4470067	1.3632089	up	PTGES	9536	0001516 // prostaglandin biosynthetic process // inferred from direct assay///0002526 // acute inflammatory response // inferred from electronic annotation///0002544 // chronic inflammatory response // inferred from electronic annotation///0006629 // lipid metabolic process // inferred from electronic annotation///0006631 // fatty acid metabolic process // inferred from electronic annotation///00…	0005641 // nuclear envelope lumen // inferred from electronic annotation///0005737 // cytoplasm // inferred from electronic annotation///0005789 // endoplasmic reticulum membrane // traceable author statement///0016020 // membrane // traceable author statement///0016021 // integral component of membrane // inferred from direct assay///0043231 // intracellular membrane-bounded organelle // inferre…	0016853 // isomerase activity // inferred from electronic annotation///0043295 // glutathione binding // inferred from direct assay///0050220 // prostaglandin-E synthase activity // not recorded///0050220 // prostaglandin-E synthase activity // inferred from direct assay	chr9:132500628-132515300 (-) // 67.9 // q34.11
218805_at	0.009239942	1.0576937	0.080921926	1.0576937	up	-1.3471538	-0.4299146	1.3471538	down	1.2685219	0.3431485	1.2685219	up	-1.5050405	-0.5898023	1.5050405	down	GIMAP1-GIMAP5///GIMAP5	55340///100527949	0001659 // temperature homeostasis // inferred from electronic annotation///0002729 // positive regulation of natural killer cell cytokine production // inferred from electronic annotation///0002925 // positive regulation of humoral immune response mediated by circulating immunoglobulin // inferred from electronic annotation///0010524 // positive regulation of calcium ion transport into cytosol /…	0000139 // Golgi membrane // inferred from electronic annotation///0005739 // mitochondrion // inferred from electronic annotation///0005741 // mitochondrial outer membrane // inferred from electronic annotation///0005764 // lysosome // inferred from electronic annotation///0005783 // endoplasmic reticulum // inferred from electronic annotation///0005789 // endoplasmic reticulum membrane // infer…	0000166 // nucleotide binding // inferred from electronic annotation///0005515 // protein binding // inferred from physical interaction///0005525 // GTP binding // inferred from electronic annotation	chr7:150434499-150440736 (+) // 87.53 // q36.1
220042_x_at	0.020251185	1.0569497	0.07990674	1.0569497	up	1.050692	0.07133969	1.050692	up	1.0405017	0.057279386	1.0405017	up	1.267465	0.34194592	1.267465	up	HIVEP3	59269	0006351 // transcription, DNA-templated // inferred from electronic annotation///0006355 // regulation of transcription, DNA-templated // inferred from electronic annotation///0006366 // transcription from RNA polymerase II promoter // not recorded///0007165 // signal transduction // not recorded///0007275 // multicellular organismal development // not recorded///0035914 // skeletal muscle cell d…	0005634 // nucleus // not recorded///0005737 // cytoplasm // inferred from electronic annotation	0003676 // nucleic acid binding // inferred from electronic annotation///0003677 // DNA binding // inferred from electronic annotation///0003700 // transcription factor activity, sequence-specific DNA binding // not recorded///0043565 // sequence-specific DNA binding // not recorded///0044212 // transcription regulatory region DNA binding // not recorded///0046872 // metal ion binding // inferred…	chr1:41975684-42384161 (-) // 99.38 // p34.2
219710_at	1.958236E-7	1.0486479	0.06853029	1.0486479	up	1.6963105	0.7624003	1.6963105	up	1.0926108	0.12777957	1.0926108	up	2.2957582	1.1989707	2.2957582	up	SH3TC2	79628	0022011 // myelination in peripheral nervous system // inferred from electronic annotation///0032287 // peripheral nervous system myelin maintenance // inferred from electronic annotation///0033157 // regulation of intracellular protein transport // inferred from electronic annotation///1901184 // regulation of ERBB signaling pathway // inferred from electronic annotation	0005886 // plasma membrane // inferred from electronic annotation///0031410 // cytoplasmic vesicle // inferred from electronic annotation///0055037 // recycling endosome // inferred from electronic annotation		chr5:148383515-148387341 (-) // 80.63 // q32
221470_s_at	0.032273985	1.0463866	0.065415904	1.0463866	up	1.0205016	0.029278452	1.0205016	up	1.0424489	0.059976704	1.0424489	up	1.1993735	0.262281	1.1993735	up	IL37	27178	0002437 // inflammatory response to antigenic stimulus // ---///0006954 // inflammatory response // inferred from electronic annotation///0006955 // immune response // non-traceable author statement///0019221 // cytokine-mediated signaling pathway // not recorded	0005576 // extracellular region // non-traceable author statement///0005576 // extracellular region // traceable author statement///0005615 // extracellular space // not recorded///0005634 // nucleus // inferred from direct assay///0005654 // nucleoplasm // inferred from direct assay///0005730 // nucleolus // inferred from direct assay///0005737 // cytoplasm // inferred from direct assay///000582…	0005125 // cytokine activity // not recorded///0005149 // interleukin-1 receptor binding // non-traceable author statement///0005149 // interleukin-1 receptor binding // traceable author statement	chr2:113672769-113676386 (+) // 100.0 // q13
215393_s_at	0.014835101	1.0453275	0.06395514	1.0453275	up	1.0582405	0.081667595	1.0582405	up	1.0640275	0.08953543	1.0640275	up	1.4630836	0.54901224	1.4630836	up	COBLL1	22837	0030041 // actin filament polymerization // not recorded///0051639 // actin filament network formation // not recorded	0070062 // extracellular exosome // inferred from direct assay	0003779 // actin binding // inferred from electronic annotation///0003785 // actin monomer binding // not recorded	chr2:165557062-165698631 (-) // 99.14 // q24.3
207844_at	0.04706796	1.0406264	0.057452302	1.0406264	up	1.0930237	0.1283247	1.0930237	up	-1.1797283	-0.23845457	1.1797283	down	1.2686439	0.34328708	1.2686439	up	IL13	3596	0001774 // microglial cell activation // inferred from electronic annotation///0002639 // positive regulation of immunoglobulin production // not recorded///0006928 // movement of cell or subcellular component // traceable author statement///0006954 // inflammatory response // inferred from electronic annotation///0006955 // immune response // inferred from electronic annotation///0007165 // sign…	0005576 // extracellular region // inferred from direct assay///0005615 // extracellular space // not recorded///0005615 // extracellular space // inferred from sequence or structural similarity///0005737 // cytoplasm // inferred from electronic annotation///0009897 // external side of plasma membrane // inferred from electronic annotation	0005125 // cytokine activity // inferred from electronic annotation///0005126 // cytokine receptor binding // inferred from electronic annotation///0005144 // interleukin-13 receptor binding // not recorded///0005515 // protein binding // inferred from physical interaction	chr5:131993864-131996802 (+) // 99.69 // q31.1
220066_at	0.0035844822	1.0393134	0.05563089	1.0393134	up	1.2372165	0.30709797	1.2372165	up	1.2059926	0.27022105	1.2059926	up	1.4681596	0.5540088	1.4681596	up	NOD2	64127	0000187 // activation of MAPK activity // traceable author statement///0002224 // toll-like receptor signaling pathway // traceable author statement///0002227 // innate immune response in mucosa // inferred from electronic annotation///0002253 // activation of immune response // inferred from electronic annotation///0002367 // cytokine production involved in immune response // inferred from mutan…	0005737 // cytoplasm // inferred from direct assay///0005737 // cytoplasm // traceable author statement///0005829 // cytosol // inferred from direct assay///0005829 // cytosol // traceable author statement///0005856 // cytoskeleton // inferred from direct assay///0005886 // plasma membrane // inferred from direct assay///0008180 // COP9 signalosome // inferred from direct assay///0009986 // cell …	0000166 // nucleotide binding // inferred from electronic annotation///0003779 // actin binding // inferred from direct assay///0005515 // protein binding // inferred from physical interaction///0005524 // ATP binding // inferred from electronic annotation///0019899 // enzyme binding // inferred from physical interaction///0019901 // protein kinase binding // inferred from physical interaction///…	chr16:50731049-50766987 (+) // 98.51 // q12.1
217767_at	0.034885306	1.0392048	0.055480003	1.0392048	up	1.7760898	0.8287045	1.7760898	up	3.241024	1.6964498	3.241024	up	1.3783345	0.46292612	1.3783345	up	C3	718	0001798 // positive regulation of type IIa hypersensitivity // inferred from electronic annotation///0001934 // positive regulation of protein phosphorylation // inferred from direct assay///0001970 // positive regulation of activation of membrane attack complex // inferred from electronic annotation///0002376 // immune system process // inferred from electronic annotation///0002507 // tolerance …	0005576 // extracellular region // traceable author statement///0005615 // extracellular space // inferred from direct assay///0005886 // plasma membrane // traceable author statement///0070062 // extracellular exosome // inferred from direct assay///0072562 // blood microparticle // inferred from direct assay	0004866 // endopeptidase inhibitor activity // inferred from electronic annotation///0005102 // receptor binding // traceable author statement///0005515 // protein binding // inferred from physical interaction///0008289 // lipid binding // inferred from electronic annotation///0031715 // C5L2 anaphylatoxin chemotactic receptor binding // inferred from direct assay///0048037 // cofactor binding //…	chr19:6677877-6720660 (-) // 99.92 // p13.3
221416_at	0.002902497	1.0321906	0.045709424	1.0321906	up	1.1452763	0.1956957	1.1452763	up	1.0341685	0.048471183	1.0341685	up	1.2362977	0.30602622	1.2362977	up	PLA2G2F	64600	0006629 // lipid metabolic process // inferred from electronic annotation///0006644 // phospholipid metabolic process // traceable author statement///0006654 // phosphatidic acid biosynthetic process // traceable author statement///0016042 // lipid catabolic process // inferred from electronic annotation///0036148 // phosphatidylglycerol acyl-chain remodeling // traceable author statement///00361…	0005576 // extracellular region // non-traceable author statement///0005576 // extracellular region // traceable author statement///0005829 // cytosol // traceable author statement	0004623 // phospholipase A2 activity // non-traceable author statement///0005509 // calcium ion binding // inferred from electronic annotation///0016787 // hydrolase activity // inferred from electronic annotation///0046872 // metal ion binding // inferred from electronic annotation	chr1:20466671-20474894 (+) // 100.0 // p36.12
208578_at	7.1933353E-4	1.0310503	0.04411477	1.0310503	up	1.0623329	0.08723595	1.0623329	up	1.1678044	0.22379854	1.1678044	up	1.5951464	0.6736889	1.5951464	up	SCN10A	6336	0002027 // regulation of heart rate // inferred from mutant phenotype///0006810 // transport // inferred from electronic annotation///0006811 // ion transport // inferred from electronic annotation///0006814 // sodium ion transport // inferred from electronic annotation///0007600 // sensory perception // traceable author statement///0019228 // neuronal action potential // not recorded///0019233 /…	0001518 // voltage-gated sodium channel complex // inferred from direct assay///0005886 // plasma membrane // ---///0016020 // membrane // inferred from electronic annotation///0016021 // integral component of membrane // inferred from electronic annotation///0030424 // axon // inferred from electronic annotation///0044299 // C-fiber // inferred from electronic annotation///0070062 // extracellul…	0005216 // ion channel activity // inferred from electronic annotation///0005244 // voltage-gated ion channel activity // inferred from electronic annotation///0005248 // voltage-gated sodium channel activity // inferred from direct assay///0005272 // sodium channel activity // inferred from electronic annotation///0005515 // protein binding // inferred from electronic annotation///0044325 // ion…	chr3:38738836-38835501 (-) // 99.17 // p22.2
211568_at	0.031077687	1.0225892	0.032226708	1.0225892	up	-1.018805	-0.026878033	1.018805	down	1.0795124	0.1103798	1.0795124	up	1.1583604	0.21208416	1.1583604	up	ADGRB3	577	0007165 // signal transduction // inferred from electronic annotation///0007166 // cell surface receptor signaling pathway // inferred from electronic annotation///0007186 // G-protein coupled receptor signaling pathway // inferred from electronic annotation///0007520 // myoblast fusion // inferred from direct assay///0016525 // negative regulation of angiogenesis // inferred from electronic anno…	0005886 // plasma membrane // inferred from physical interaction///0016020 // membrane // inferred from electronic annotation///0016021 // integral component of membrane // inferred from electronic annotation	0004871 // signal transducer activity // inferred from electronic annotation///0004888 // transmembrane signaling receptor activity // inferred from electronic annotation///0004930 // G-protein coupled receptor activity // inferred from electronic annotation///0005096 // GTPase activator activity // inferred from sequence or structural similarity///0005515 // protein binding // inferred from phys…	chr6:69345350-70037038 (+) // 82.47 // q12
216535_at	0.0028621696	1.019264	0.027527759	1.019264	up	1.003585	0.0051627606	1.003585	up	1.1416277	0.19109213	1.1416277	up	1.424544	0.51050013	1.424544	up	CADM3	57863	0007155 // cell adhesion // inferred from electronic annotation///0007156 // homophilic cell adhesion via plasma membrane adhesion molecules // not recorded///0007156 // homophilic cell adhesion via plasma membrane adhesion molecules // inferred from sequence or structural similarity///0007157 // heterophilic cell-cell adhesion via plasma membrane cell adhesion molecules // not recorded///0007157…	0005886 // plasma membrane // traceable author statement///0005887 // integral component of plasma membrane // not recorded///0005911 // cell-cell junction // inferred from sequence or structural similarity///0005913 // cell-cell adherens junction // not recorded///0016020 // membrane // inferred from electronic annotation///0016021 // integral component of membrane // inferred from electronic an…	0004872 // receptor activity // not recorded///0005102 // receptor binding // not recorded///0005515 // protein binding // inferred from electronic annotation///0042803 // protein homodimerization activity // not recorded///0042803 // protein homodimerization activity // inferred from sequence or structural similarity///0050839 // cell adhesion molecule binding // not recorded	chr1:159165774-159166793 (+) // 98.84 // q23.2
210118_s_at	0.021682717	1.0169258	0.024214372	1.0169258	up	1.0503005	0.07080209	1.0503005	up	-1.0236909	-0.033780277	1.0236909	down	1.3844563	0.46931955	1.3844563	up	IL1A	3552	0001660 // fever generation // inferred from electronic annotation///0002248 // connective tissue replacement involved in inflammatory response wound healing // inferred from electronic annotation///0002437 // inflammatory response to antigenic stimulus // ---///0006915 // apoptotic process // traceable author statement///0006954 // inflammatory response // traceable author statement///0006955 //…	0005576 // extracellular region // traceable author statement///0005615 // extracellular space // inferred from direct assay///0005615 // extracellular space // inferred from mutant phenotype///0005829 // cytosol // inferred from direct assay	0005125 // cytokine activity // inferred from mutant phenotype///0005149 // interleukin-1 receptor binding // inferred from electronic annotation///0005507 // copper ion binding // inferred from direct assay///0005515 // protein binding // inferred from physical interaction	chr2:113531779-113541352 (-) // 80.0 // q13
206680_at	0.033563007	1.013548	0.019414488	1.013548	up	-1.0000079	-1.1429191E-5	1.0000079	down	-1.0578426	-0.081125036	1.0578426	down	1.1074718	0.14727002	1.1074718	up	CD5L	922	0006898 // receptor-mediated endocytosis // inferred from electronic annotation///0006915 // apoptotic process // inferred from electronic annotation///0006968 // cellular defense response // traceable author statement	0005576 // extracellular region // non-traceable author statement///0005615 // extracellular space // traceable author statement///0016020 // membrane // inferred from electronic annotation///0070062 // extracellular exosome // inferred from direct assay///0072562 // blood microparticle // inferred from direct assay	0005044 // scavenger receptor activity // inferred from electronic annotation	chr1:157800703-157811551 (-) // 98.58 // q23.1
207262_at	4.624632E-4	1.0126395	0.018120628	1.0126395	up	-1.0369595	-0.052359622	1.0369595	down	1.0320556	0.045520764	1.0320556	up	1.198452	0.26117215	1.198452	up	APOF	319	0006629 // lipid metabolic process // traceable author statement///0006641 // triglyceride metabolic process // inferred from electronic annotation///0006810 // transport // inferred from electronic annotation///0006869 // lipid transport // inferred from electronic annotation///0008202 // steroid metabolic process // inferred from electronic annotation///0008203 // cholesterol metabolic process …	0005576 // extracellular region // non-traceable author statement///0034362 // low-density lipoprotein particle // inferred from electronic annotation///0034364 // high-density lipoprotein particle // inferred from electronic annotation	0005102 // receptor binding // traceable author statement///0005319 // lipid transporter activity // traceable author statement///0015485 // cholesterol binding // traceable author statement	chr12:56754454-56756569 (-) // 66.03 // q13.3
205254_x_at	2.264901E-5	1.0114999	0.016496137	1.0114999	up	1.6628351	0.7336451	1.6628351	up	1.2750751	0.35058224	1.2750751	up	8421-01-01	0.8813514	8421-01-01	up	TCF7	6932	0006351 // transcription, DNA-templated // inferred from electronic annotation///0006355 // regulation of transcription, DNA-templated // inferred from electronic annotation///0006355 // regulation of transcription, DNA-templated // ---///0006357 // regulation of transcription from RNA polymerase II promoter // not recorded///0006955 // immune response // traceable author statement///0007420 // b…	0005634 // nucleus // inferred from direct assay///0005654 // nucleoplasm // traceable author statement///0005667 // transcription factor complex // not recorded	0003677 // DNA binding // inferred from electronic annotation///0003682 // chromatin binding // not recorded///0003700 // transcription factor activity, sequence-specific DNA binding // not recorded///0005515 // protein binding // inferred from physical interaction///0008013 // beta-catenin binding // inferred from direct assay///0043565 // sequence-specific DNA binding // not recorded///0044212 …	chr5:133451315-133483919 (+) // 89.28 // q31.1
205840_x_at	0.033119433	1.0094911	0.013628254	1.0094911	up	1.0503118	0.070817605	1.0503118	up	1.0419399	0.05927194	1.0419399	up	1.2862917	0.36321786	1.2862917	up	GH1	2688	0002092 // positive regulation of receptor internalization // inferred from direct assay///0007259 // JAK-STAT cascade // inferred from direct assay///0010535 // positive regulation of activation of JAK2 kinase activity // inferred from direct assay///0014068 // positive regulation of phosphatidylinositol 3-kinase signaling // inferred from direct assay///0015758 // glucose transport // inferred …	0005576 // extracellular region // traceable author statement///0005615 // extracellular space // inferred from direct assay///0005622 // intracellular // inferred from direct assay///0005622 // intracellular // traceable author statement	0005131 // growth hormone receptor binding // inferred from direct assay///0005131 // growth hormone receptor binding // inferred from physical interaction///0005148 // prolactin receptor binding // inferred from direct assay///0005148 // prolactin receptor binding // inferred from physical interaction///0005179 // hormone activity // inferred from electronic annotation///0005515 // protein bindi…	chr17:61994562-61996198 (-) // 99.88 // q23.3
210726_at	8.7366806E-4	1.0006388	9.213127E-4	1.0006388	up	-1.084972	-0.117657885	1.084972	down	-1.0165511	-0.02368277	1.0165511	down	1.2898582	0.36721247	1.2898582	up	CYP3A4	1576	0006629 // lipid metabolic process // traceable author statement///0006706 // steroid catabolic process // inferred from mutant phenotype///0006805 // xenobiotic metabolic process // traceable author statement///0008202 // steroid metabolic process // inferred from mutant phenotype///0008209 // androgen metabolic process // traceable author statement///0009822 // alkaloid catabolic process // inf…	0005737 // cytoplasm // inferred from direct assay///0005783 // endoplasmic reticulum // inferred from electronic annotation///0005789 // endoplasmic reticulum membrane // traceable author statement///0016020 // membrane // inferred from electronic annotation///0016020 // membrane // traceable author statement///0016021 // integral component of membrane // inferred from electronic annotation///00…	0004497 // monooxygenase activity // inferred from direct assay///0004497 // monooxygenase activity // inferred from sequence or structural similarity///0005496 // steroid binding // inferred from direct assay///0005506 // iron ion binding // inferred from direct assay///0008395 // steroid hydroxylase activity // inferred from mutant phenotype///0016491 // oxidoreductase activity // inferred from…	chr7:99354582-99381772 (-) // 83.68 // q22.1
202509_s_at	0.048171442	-1.0066465	-0.009557205	1.0066465	down	1.0031582	0.0045491327	1.0031582	up	-1.0495524	-0.06977419	1.0495524	down	1.3805523	0.46524557	1.3805523	up	TNFAIP2	7127	0001525 // angiogenesis // inferred from electronic annotation///0006887 // exocytosis // not recorded///0007275 // multicellular organismal development // inferred from electronic annotation///0030154 // cell differentiation // inferred from electronic annotation///0051601 // exocyst localization // not recorded	0000145 // exocyst // not recorded///0005615 // extracellular space // traceable author statement	0000149 // SNARE binding // not recorded	chr14:103590104-103603773 (+) // 74.52 // q32.32
208423_s_at	0.03959349	-1.0105959	-0.015206255	1.0105959	down	1.0594759	0.083350725	1.0594759	up	1.1420069	0.19157128	1.1420069	up	1.2644968	0.33856344	1.2644968	up	MSR1	4481	0006897 // endocytosis // inferred from electronic annotation///0006898 // receptor-mediated endocytosis // traceable author statement///0010744 // positive regulation of macrophage derived foam cell differentiation // inferred from sequence or structural similarity///0010886 // positive regulation of cholesterol storage // inferred from sequence or structural similarity///0030301 // cholesterol …	0005581 // collagen trimer // inferred from electronic annotation///0005829 // cytosol // inferred from electronic annotation///0005886 // plasma membrane // traceable author statement///0005887 // integral component of plasma membrane // traceable author statement///0016020 // membrane // inferred from electronic annotation///0016021 // integral component of membrane // inferred from electronic …	0005044 // scavenger receptor activity // inferred from electronic annotation///0005515 // protein binding // inferred from physical interaction///0030169 // low-density lipoprotein particle binding // inferred from sequence or structural similarity	chr8:15998287-16050168 (-) // 99.93 // p22
219033_at	0.023962362	-1.0123731	-0.017741024	1.0123731	down	-1.1118155	-0.15291728	1.1118155	down	1.3403662	0.4226272	1.3403662	up	1.3869245	0.47188926	1.3869245	up	PARP8	79668	0008152 // metabolic process // inferred from electronic annotation	0005622 // intracellular // inferred from direct assay	0003950 // NAD+ ADP-ribosyltransferase activity // inferred from electronic annotation///0016740 // transferase activity // inferred from electronic annotation///0016757 // transferase activity, transferring glycosyl groups // inferred from electronic annotation	chr5:50090075-50138169 (+) // 97.26 // q11.1
64064_at	0.019551389	-1.012613	-0.018082913	1.012613	down	-1.2712233	-0.3462175	1.2712233	down	1.2608262	0.33436945	1.2608262	up	-1.2284001	-0.29678056	1.2284001	down	GIMAP1-GIMAP5///GIMAP5	55340///100527949	0001659 // temperature homeostasis // inferred from electronic annotation///0002729 // positive regulation of natural killer cell cytokine production // inferred from electronic annotation///0002925 // positive regulation of humoral immune response mediated by circulating immunoglobulin // inferred from electronic annotation///0010524 // positive regulation of calcium ion transport into cytosol /…	0000139 // Golgi membrane // inferred from electronic annotation///0005739 // mitochondrion // inferred from electronic annotation///0005741 // mitochondrial outer membrane // inferred from electronic annotation///0005764 // lysosome // inferred from electronic annotation///0005783 // endoplasmic reticulum // inferred from electronic annotation///0005789 // endoplasmic reticulum membrane // infer…	0000166 // nucleotide binding // inferred from electronic annotation///0005515 // protein binding // inferred from physical interaction///0005525 // GTP binding // inferred from electronic annotation	chr7:150439581-150440734 (+) // 84.91 // q36.1
215817_at	7.4406715E-5	-1.0175803	-0.025142595	1.0175803	down	-1.009316	-0.013377829	1.009316	down	-1.0582677	-0.0817047	1.0582677	down	1.4885502	0.5739079	1.4885502	up	SERPINB13	5275	0009411 // response to UV // traceable author statement///0010466 // negative regulation of peptidase activity // inferred from electronic annotation///0010951 // negative regulation of endopeptidase activity // inferred from direct assay///0030162 // regulation of proteolysis // non-traceable author statement///1902173 // negative regulation of keratinocyte apoptotic process // inferred from mut…	0005615 // extracellular space // not recorded///0005654 // nucleoplasm // inferred from direct assay///0005730 // nucleolus // inferred from direct assay///0005737 // cytoplasm // inferred from direct assay///0016020 // membrane // inferred from electronic annotation///0016021 // integral component of membrane // inferred from electronic annotation///0070062 // extracellular exosome // inferred …	0002020 // protease binding // inferred from physical interaction///0004867 // serine-type endopeptidase inhibitor activity // inferred from direct assay///0004867 // serine-type endopeptidase inhibitor activity // non-traceable author statement///0004869 // cysteine-type endopeptidase inhibitor activity // inferred from direct assay///0004869 // cysteine-type endopeptidase inhibitor activity // …	chr18:61262223-61262739 (-) // 96.06 // q21.33
220315_at	0.024344465	-1.0274279	-0.039037175	1.0274279	down	-1.0619789	-0.08675508	1.0619789	down	1.1685625	0.22473487	1.1685625	up	1.0730792	0.101756565	1.0730792	up	PARP11	57097	0006998 // nuclear envelope organization // inferred from electronic annotation///0008152 // metabolic process // inferred from electronic annotation	0005635 // nuclear envelope // inferred from direct assay	0003950 // NAD+ ADP-ribosyltransferase activity // inferred from direct assay///0016740 // transferase activity // inferred from electronic annotation///0016757 // transferase activity, transferring glycosyl groups // inferred from electronic annotation	chr12:3921211-3939236 (-) // 100.0 // p13.32
206256_at	0.017883196	-1.0280305	-0.039883018	1.0280305	down	1.179827	0.23857528	1.179827	up	1.0713049	0.09936921	1.0713049	up	1.2869205	0.36392292	1.2869205	up	CPN1	1369	0006508 // proteolysis // inferred from electronic annotation///0006518 // peptide metabolic process // not recorded///0010815 // bradykinin catabolic process // inferred from electronic annotation///0016485 // protein processing // not recorded///0051384 // response to glucocorticoid // inferred from electronic annotation	0005576 // extracellular region // inferred from electronic annotation///0005615 // extracellular space // inferred from electronic annotation	0004180 // carboxypeptidase activity // inferred from electronic annotation///0004181 // metallocarboxypeptidase activity // inferred from electronic annotation///0004185 // serine-type carboxypeptidase activity // not recorded///0008233 // peptidase activity // inferred from electronic annotation///0008237 // metallopeptidase activity // inferred from electronic annotation///0008270 // zinc ion …	chr10:101802071-101841594 (-) // 99.94 // q24.2
209239_at	0.014735465	-1.0320271	-0.045480896	1.0320271	down	-1.1271955	-0.17273773	1.1271955	down	-1.0454794	-0.06416465	1.0454794	down	-1.4084213	-0.49407896	1.4084213	down	NFKB1	4790	0000122 // negative regulation of transcription from RNA polymerase II promoter // inferred by curator///0000122 // negative regulation of transcription from RNA polymerase II promoter // inferred from genetic interaction///0000122 // negative regulation of transcription from RNA polymerase II promoter // inferred from mutant phenotype///0001818 // negative regulation of cytokine production // in…	0005634 // nucleus // inferred from direct assay///0005654 // nucleoplasm // inferred from direct assay///0005654 // nucleoplasm // traceable author statement///0005737 // cytoplasm // inferred from direct assay///0005739 // mitochondrion // inferred from direct assay///0005829 // cytosol // not recorded///0005829 // cytosol // traceable author statement///0033256 // I-kappaB/NF-kappaB complex //…	0000975 // regulatory region DNA binding // inferred from direct assay///0000976 // transcription regulatory region sequence-specific DNA binding // inferred from direct assay///0000977 // RNA polymerase II regulatory region sequence-specific DNA binding // inferred from direct assay///0000980 // RNA polymerase II distal enhancer sequence-specific DNA binding // inferred from direct assay///00012…	chr4:103422779-103537857 (+) // 95.88 // q24
215411_s_at	0.011312796	-1.038823	-0.05494982	1.038823	down	-1.4124252	-0.49817443	1.4124252	down	-1.4311289	-0.5171536	1.4311289	down	-1.4615455	-0.54749477	1.4615455	down	TRAF3IP2	10758	0001783 // B cell apoptotic process // inferred from electronic annotation///0002230 // positive regulation of defense response to virus by host // inferred from direct assay///0006959 // humoral immune response // inferred from electronic annotation///0035556 // intracellular signal transduction // non-traceable author statement///0043123 // positive regulation of I-kappaB kinase/NF-kappaB signa…	0005622 // intracellular // non-traceable author statement///0005623 // cell // inferred from electronic annotation	0005515 // protein binding // inferred from physical interaction	chr6:111880142-111888466 (-) // 99.65 // q21
211488_s_at	0.0051216213	-1.0446416	-0.06300803	1.0446416	down	1.0466449	0.065772094	1.0466449	up	1.0412139	0.058266398	1.0412139	up	1.2776076	0.35344478	1.2776076	up	ITGB8	3696	0001573 // ganglioside metabolic process // inferred from electronic annotation///0007155 // cell adhesion // traceable author statement///0007160 // cell-matrix adhesion // inferred from mutant phenotype///0007229 // integrin-mediated signaling pathway // inferred from electronic annotation///0010628 // positive regulation of gene expression // inferred from mutant phenotype///0010629 // negativ…	0005886 // plasma membrane // traceable author statement///0008305 // integrin complex // traceable author statement///0009986 // cell surface // inferred from direct assay///0016020 // membrane // inferred from electronic annotation///0016021 // integral component of membrane // inferred from electronic annotation///0034686 // integrin alphav-beta8 complex // inferred from direct assay///0070062…	0004872 // receptor activity // inferred from electronic annotation///0005102 // receptor binding // inferred from electronic annotation///1990430 // extracellular matrix protein binding // inferred from direct assay	chr7:20370724-20438680 (+) // 97.54 // p21.1
217303_s_at	0.04710292	-1.045292	-0.06390603	1.045292	down	-1.0707467	-0.098617174	1.0707467	down	1.0039011	0.005617261	1.0039011	up	1.1755133	0.23329085	1.1755133	up	ADRB3	155	0001659 // temperature homeostasis // not recorded///0002024 // diet induced thermogenesis // inferred from electronic annotation///0002025 // vasodilation by norepinephrine-epinephrine involved in regulation of systemic arterial blood pressure // not recorded///0002032 // desensitization of G-protein coupled receptor protein signaling pathway by arrestin // inferred from direct assay///0005975 /…	0005634 // nucleus // inferred from electronic annotation///0005886 // plasma membrane // traceable author statement///0005887 // integral component of plasma membrane // traceable author statement///0016020 // membrane // inferred from electronic annotation///0016021 // integral component of membrane // inferred from electronic annotation///0043235 // receptor complex // inferred from direct ass…	0004871 // signal transducer activity // inferred from electronic annotation///0004930 // G-protein coupled receptor activity // inferred from electronic annotation///0004935 // adrenergic receptor activity // inferred from electronic annotation///0004939 // beta-adrenergic receptor activity // inferred from direct assay///0005515 // protein binding // inferred from physical interaction///0015052…	chr8:37821396-37822814 (-) // 99.78 // p11.23
210081_at	0.022543484	-1.0462952	-0.06528998	1.0462952	down	-1.023442	-0.033429332	1.023442	down	1.151354	0.20333143	1.151354	up	1.2575709	0.33063963	1.2575709	up	AGER	177	0001666 // response to hypoxia // inferred from electronic annotation///0001933 // negative regulation of protein phosphorylation // inferred from electronic annotation///0001934 // positive regulation of protein phosphorylation // inferred from electronic annotation///0001937 // negative regulation of endothelial cell proliferation // inferred from electronic annotation///0006954 // inflammatory…	0005576 // extracellular region // inferred from electronic annotation///0005615 // extracellular space // inferred from electronic annotation///0005737 // cytoplasm // inferred from electronic annotation///0005829 // cytosol // inferred from electronic annotation///0005886 // plasma membrane // traceable author statement///0005887 // integral component of plasma membrane // traceable author stat…	0004872 // receptor activity // traceable author statement///0004888 // transmembrane signaling receptor activity // traceable author statement///0005515 // protein binding // inferred from physical interaction///0042802 // identical protein binding // inferred from physical interaction///0044548 // S100 protein binding // inferred from physical interaction///0050785 // advanced glycation end-pro…	chr6:32148890-32152023 (-) // 99.92 // p21.32
211676_s_at	0.04219929	-1.0471017	-0.066401675	1.0471017	down	-1.3235848	-0.40445068	1.3235848	down	-1.0049986	-0.0071935207	1.0049986	down	-1.9665089	-0.9756367	1.9665089	down	IFNGR1	3459	0007165 // signal transduction // traceable author statement///0009615 // response to virus // traceable author statement///0019221 // cytokine-mediated signaling pathway // not recorded///0019221 // cytokine-mediated signaling pathway // traceable author statement///0060333 // interferon-gamma-mediated signaling pathway // traceable author statement///0060334 // regulation of interferon-gamma-me…	0005783 // endoplasmic reticulum // inferred from electronic annotation///0005886 // plasma membrane // not recorded///0005886 // plasma membrane // traceable author statement///0005887 // integral component of plasma membrane // traceable author statement///0014069 // postsynaptic density // inferred from electronic annotation///0016020 // membrane // inferred from electronic annotation///001602…	0004906 // interferon-gamma receptor activity // traceable author statement///0005515 // protein binding // inferred from physical interaction///0019955 // cytokine binding // inferred from electronic annotation	chr6:137519017-137540485 (-) // 99.82 // q23.3
210423_s_at	0.006560101	-1.0497073	-0.06998709	1.0497073	down	1.1199197	0.16339526	1.1199197	up	1.2135019	0.27917638	1.2135019	up	1.9434377	0.95861083	1.9434377	up	SLC11A1	6556	0000060 // protein import into nucleus, translocation // inferred from electronic annotation///0001818 // negative regulation of cytokine production // inferred from sequence or structural similarity///0001819 // positive regulation of cytokine production // inferred from sequence or structural similarity///0002309 // T cell proliferation involved in immune response // inferred from sequence or s…	0005764 // lysosome // inferred from sequence or structural similarity///0005770 // late endosome // inferred from sequence or structural similarity///0005886 // plasma membrane // inferred from mutant phenotype///0005887 // integral component of plasma membrane // non-traceable author statement///0009279 // cell outer membrane // inferred from electronic annotation///0010008 // endosome membrane…	0005215 // transporter activity // inferred from electronic annotation///0005384 // manganese ion transmembrane transporter activity // inferred from sequence or structural similarity///0042803 // protein homodimerization activity // inferred from direct assay///0046915 // transition metal ion transmembrane transporter activity // inferred from genetic interaction///0051139 // metal ion:proton an…	chr2:219247024-219260031 (+) // 87.34 // q35
220146_at	0.047436204	-1.0511161	-0.071922	1.0511161	down	-1.1578363	-0.21143131	1.1578363	down	1.2511191	0.32321918	1.2511191	up	-1.0405685	-0.057371944	1.0405685	down	TLR7	51284	0001774 // microglial cell activation // inferred from electronic annotation///0001932 // regulation of protein phosphorylation // inferred from electronic annotation///0002224 // toll-like receptor signaling pathway // traceable author statement///0002376 // immune system process // inferred from electronic annotation///0002755 // MyD88-dependent toll-like receptor signaling pathway // inferred …	0000139 // Golgi membrane // traceable author statement///0005737 // cytoplasm // inferred from direct assay///0005764 // lysosome // inferred from sequence or structural similarity///0005768 // endosome // inferred from sequence or structural similarity///0005783 // endoplasmic reticulum // inferred from sequence or structural similarity///0005789 // endoplasmic reticulum membrane // traceable a…	0003725 // double-stranded RNA binding // inferred from direct assay///0003727 // single-stranded RNA binding // inferred from sequence or structural similarity///0004888 // transmembrane signaling receptor activity // inferred from electronic annotation///0005515 // protein binding // inferred from electronic annotation///0008144 // drug binding // inferred from electronic annotation///0035197 /…	chrX:12885205-12908499 (+) // 93.85 // p22.2
207454_at	0.04518603	-1.053925	-0.075772226	1.053925	down	1.058734	0.0823403	1.058734	up	-1.1097465	-0.15023011	1.1097465	down	1.3654149	0.44933933	1.3654149	up	GRIK3	2899	0006810 // transport // inferred from electronic annotation///0006811 // ion transport // inferred from electronic annotation///0007196 // adenylate cyclase-inhibiting G-protein coupled glutamate receptor signaling pathway // inferred from direct assay///0007215 // glutamate receptor signaling pathway // inferred from direct assay///0007216 // G-protein coupled glutamate receptor signaling pathwa…	0005886 // plasma membrane // not recorded///0005886 // plasma membrane // traceable author statement///0005887 // integral component of plasma membrane // inferred from direct assay///0016020 // membrane // inferred from electronic annotation///0016021 // integral component of membrane // inferred from electronic annotation///0030054 // cell junction // inferred from electronic annotation///0030…	0001640 // adenylate cyclase inhibiting G-protein coupled glutamate receptor activity // inferred from direct assay///0004872 // receptor activity // inferred from electronic annotation///0004970 // ionotropic glutamate receptor activity // inferred from direct assay///0004970 // ionotropic glutamate receptor activity // inferred from sequence or structural similarity///0005216 // ion channel act…	chr1:37266613-37499726 (-) // 99.78 // p34.3
219748_at	0.013512024	-1.0560769	-0.078714915	1.0560769	down	1.19747	0.25998944	1.19747	up	-1.0442346	-0.062445946	1.0442346	down	1.339308	0.42148778	1.339308	up	TREML2	79865	0042110 // T cell activation // inferred from direct assay///0050776 // regulation of immune response // traceable author statement	0005886 // plasma membrane // traceable author statement///0009986 // cell surface // inferred from direct assay///0016020 // membrane // inferred from electronic annotation///0016021 // integral component of membrane // inferred from electronic annotation	0004872 // receptor activity // inferred from direct assay///0005515 // protein binding // inferred from physical interaction	chr6:41158227-41168924 (-) // 90.78 // p21.1
205581_s_at	0.030142622	-1.0579146	-0.0812232	1.0579146	down	1.1879824	0.24851355	1.1879824	up	1.499691	0.5846653	1.499691	up	1.3644688	0.44833946	1.3644688	up	NOS3	4846	0001525 // angiogenesis // inferred from electronic annotation///0001542 // ovulation from ovarian follicle // inferred from electronic annotation///0001701 // in utero embryonic development // inferred from electronic annotation///0001974 // blood vessel remodeling // inferred from sequence or structural similarity///0002028 // regulation of sodium ion transport // inferred from electronic annot…	0000139 // Golgi membrane // traceable author statement///0005634 // nucleus // inferred from sequence or structural similarity///0005737 // cytoplasm // inferred from direct assay///0005794 // Golgi apparatus // inferred from electronic annotation///0005829 // cytosol // not recorded///0005829 // cytosol // traceable author statement///0005856 // cytoskeleton // inferred from electronic annotati…	0003785 // actin monomer binding // inferred from physical interaction///0003958 // NADPH-hemoprotein reductase activity // not recorded///0004517 // nitric-oxide synthase activity // inferred from direct assay///0004517 // nitric-oxide synthase activity // inferred from mutant phenotype///0005506 // iron ion binding // inferred from electronic annotation///0005515 // protein binding // inferred …	chr7:150690871-150711315 (+) // 99.11 // q36.1
201792_at	8.2905183E-4	-1.0613854	-0.085948646	1.0613854	down	2.0685773	1.0486388	2.0685773	up	3.4636035	1.7922738	3.4636035	up	3.242395	1.6970599	3.242395	up	AEBP1	165	0000122 // negative regulation of transcription from RNA polymerase II promoter // inferred from mutant phenotype///0001501 // skeletal system development // traceable author statement///0006351 // transcription, DNA-templated // inferred from electronic annotation///0006355 // regulation of transcription, DNA-templated // inferred from electronic annotation///0006508 // proteolysis // inferred f…	0005576 // extracellular region // inferred from electronic annotation///0005615 // extracellular space // inferred from direct assay///0005634 // nucleus // inferred from electronic annotation///0005737 // cytoplasm // inferred from electronic annotation///0031012 // extracellular matrix // inferred from direct assay///0070062 // extracellular exosome // inferred from direct assay	0000977 // RNA polymerase II regulatory region sequence-specific DNA binding // inferred from direct assay///0001227 // transcriptional repressor activity, RNA polymerase II transcription regulatory region sequence-specific binding // inferred from direct assay///0001227 // transcriptional repressor activity, RNA polymerase II transcription regulatory region sequence-specific binding // inferred …	chr7:44144125-44154158 (+) // 94.84 // p13
214417_s_at	0.014839222	-1.0685529	-0.09565821	1.0685529	down	1.0858138	0.11877665	1.0858138	up	1.0172486	0.024672357	1.0172486	up	1.2032444	0.26692972	1.2032444	up	LOC105374258	105374258				chr3:186364071-186370797 (-) // 97.7 // q27.3
217778_at	0.018113697	-1.0704044	-0.09815594	1.0704044	down	1.2010233	0.26426423	1.2010233	up	1.1275446	0.1731846	1.1275446	up	-1.2388074	-0.308952	1.2388074	down	SLC39A1	27173	0001701 // in utero embryonic development // inferred from electronic annotation///0006810 // transport // inferred from electronic annotation///0006811 // ion transport // inferred from electronic annotation///0006812 // cation transport // traceable author statement///0006829 // zinc II ion transport // inferred from electronic annotation///0030001 // metal ion transport // inferred from electr…	0005783 // endoplasmic reticulum // inferred from electronic annotation///0005789 // endoplasmic reticulum membrane // inferred from electronic annotation///0005886 // plasma membrane // inferred from direct assay///0005886 // plasma membrane // traceable author statement///0016020 // membrane // traceable author statement///0016021 // integral component of membrane // inferred from electronic an…	0005102 // receptor binding // inferred from electronic annotation///0005385 // zinc ion transmembrane transporter activity // not recorded///0022890 // inorganic cation transmembrane transporter activity // traceable author statement///0046873 // metal ion transmembrane transporter activity // inferred from electronic annotation	chr1:153931586-153936011 (-) // 97.58 // q21.3
204085_s_at	0.04335375	-1.0718149	-0.100055784	1.0718149	down	1.2064698	0.27079174	1.2064698	up	1.0753406	0.10479368	1.0753406	up	-1.3965031	-0.48181874	1.3965031	down	CLN5	1203	0006465 // signal peptide processing // inferred from direct assay///0007040 // lysosome organization // inferred from electronic annotation///0007042 // lysosomal lumen acidification // inferred from mutant phenotype///0007420 // brain development // inferred from expression pattern///0007601 // visual perception // inferred from electronic annotation///0022008 // neurogenesis // inferred from e…	0005764 // lysosome // inferred from direct assay///0005765 // lysosomal membrane // inferred from direct assay///0005775 // vacuolar lumen // inferred from electronic annotation///0005783 // endoplasmic reticulum // inferred from direct assay///0005794 // Golgi apparatus // inferred from direct assay///0016021 // integral component of membrane // inferred from direct assay///0016021 // integral …	0005515 // protein binding // inferred from physical interaction///0005537 // mannose binding // inferred from direct assay	chr13:77564794-77576651 (+) // 86.32 // q22.3
207251_at	0.032258153	-1.0770955	-0.10714623	1.0770955	down	-1.3889219	-0.4739654	1.3889219	down	-1.6217941	-0.6975907	1.6217941	down	-1.6113747	-0.688292	1.6113747	down	MEP1B	4225	0006508 // proteolysis // inferred from electronic annotation///0006954 // inflammatory response // inferred from electronic annotation///0007586 // digestion // traceable author statement///1901998 // toxin transport // inferred from electronic annotation	0005576 // extracellular region // inferred from electronic annotation///0005615 // extracellular space // traceable author statement///0005886 // plasma membrane // traceable author statement///0005887 // integral component of plasma membrane // traceable author statement///0016020 // membrane // inferred from electronic annotation///0016021 // integral component of membrane // inferred from ele…	0004222 // metalloendopeptidase activity // inferred from electronic annotation///0005515 // protein binding // inferred from physical interaction///0008233 // peptidase activity // inferred from electronic annotation///0008237 // metallopeptidase activity // inferred from electronic annotation///0008270 // zinc ion binding // inferred from electronic annotation///0016787 // hydrolase activity //…	chr18:29769987-29800364 (+) // 99.01 // q12.1
207016_s_at	0.036670346	-1.0805783	-0.111803666	1.0805783	down	-1.2693889	-0.3441342	1.2693889	down	1.4451389	0.5312082	1.4451389	up	-1.1244324	-0.16919696	1.1244324	down	ALDH1A2	8854	0001568 // blood vessel development // inferred from electronic annotation///0001822 // kidney development // inferred from electronic annotation///0001889 // liver development // inferred from electronic annotation///0001936 // regulation of endothelial cell proliferation // inferred from electronic annotation///0002138 // retinoic acid biosynthetic process // inferred from electronic annotation…	0005737 // cytoplasm // inferred from direct assay///0005829 // cytosol // traceable author statement///0048471 // perinuclear region of cytoplasm // inferred from electronic annotation	0001758 // retinal dehydrogenase activity // not recorded///0001758 // retinal dehydrogenase activity // inferred from sequence or structural similarity///0004028 // 3-chloroallyl aldehyde dehydrogenase activity // not recorded///0004028 // 3-chloroallyl aldehyde dehydrogenase activity // inferred from sequence or structural similarity///0004029 // aldehyde dehydrogenase (NAD) activity // not rec…	chr15:58245628-58306186 (-) // 99.94 // q21.3
211442_x_at	0.034497917	-1.0807357	-0.11201379	1.0807357	down	1.1027133	0.14105785	1.1027133	up	-1.2133794	-0.27903068	1.2133794	down	1.0300384	0.04269802	1.0300384	up	CYP3A43	64816	0006805 // xenobiotic metabolic process // traceable author statement///0044281 // small molecule metabolic process // traceable author statement///0055114 // oxidation-reduction process // inferred from electronic annotation	0005783 // endoplasmic reticulum // inferred from electronic annotation///0005789 // endoplasmic reticulum membrane // traceable author statement///0016020 // membrane // inferred from electronic annotation///0016021 // integral component of membrane // inferred from electronic annotation///0031090 // organelle membrane // inferred from electronic annotation///0043231 // intracellular membrane-bo…	0004497 // monooxygenase activity // inferred from sequence or structural similarity///0005506 // iron ion binding // inferred from electronic annotation///0016491 // oxidoreductase activity // inferred from electronic annotation///0016705 // oxidoreductase activity, acting on paired donors, with incorporation or reduction of molecular oxygen // inferred from electronic annotation///0016712 // ox…	chr7:99425738-99463624 (+) // 92.59 // q22.1
221529_s_at	0.019554477	-1.083322	-0.11546226	1.083322	down	-1.0122795	-0.017607644	1.0122795	down	1.9473995	0.96154886	1.9473995	up	1.6320769	0.70670897	1.6320769	up	PLVAP	83483	0000165 // MAPK cascade // inferred from direct assay///0002693 // positive regulation of cellular extravasation // inferred from mutant phenotype///0033209 // tumor necrosis factor-mediated signaling pathway // inferred from direct assay///0070528 // protein kinase C signaling // inferred from direct assay	0005737 // cytoplasm // inferred from electronic annotation///0005886 // plasma membrane // inferred from electronic annotation///0005901 // caveola // inferred from direct assay///0009986 // cell surface // inferred from direct assay///0016020 // membrane // inferred from electronic annotation///0016021 // integral component of membrane // inferred from electronic annotation///0048471 // perinuc…	0005515 // protein binding // inferred from physical interaction///0042803 // protein homodimerization activity // inferred from electronic annotation	chr19:17462264-17488140 (-) // 99.35 // p13.11
206637_at	0.030908808	-1.0891826	-0.123245835	1.0891826	down	-1.9242743	-0.9443145	1.9242743	down	1.0248028	0.03534639	1.0248028	up	-1.9847842	-0.9889822	1.9847842	down	P2RY14	9934	0007165 // signal transduction // inferred from electronic annotation///0007186 // G-protein coupled receptor signaling pathway // not recorded///0007186 // G-protein coupled receptor signaling pathway // non-traceable author statement///0035589 // G-protein coupled purinergic nucleotide receptor signaling pathway // not recorded///0035589 // G-protein coupled purinergic nucleotide receptor signa…	0005886 // plasma membrane // traceable author statement///0005887 // integral component of plasma membrane // not recorded///0016020 // membrane // inferred from electronic annotation///0016021 // integral component of membrane // non-traceable author statement	0004871 // signal transducer activity // inferred from electronic annotation///0004930 // G-protein coupled receptor activity // inferred from electronic annotation///0045028 // G-protein coupled purinergic nucleotide receptor activity // not recorded///0045029 // UDP-activated nucleotide receptor activity // non-traceable author statement	chr3:150929904-150996157 (-) // 97.6 // q25.1
214770_at	0.008128416	-1.0895941	-0.1237908	1.0895941	down	1.0742112	0.1032777	1.0742112	up	1.596554	0.6749614	1.596554	up	1.256699	0.32963908	1.256699	up	MSR1	4481	0006897 // endocytosis // inferred from electronic annotation///0006898 // receptor-mediated endocytosis // traceable author statement///0010744 // positive regulation of macrophage derived foam cell differentiation // inferred from sequence or structural similarity///0010886 // positive regulation of cholesterol storage // inferred from sequence or structural similarity///0030301 // cholesterol …	0005581 // collagen trimer // inferred from electronic annotation///0005829 // cytosol // inferred from electronic annotation///0005886 // plasma membrane // traceable author statement///0005887 // integral component of plasma membrane // traceable author statement///0016020 // membrane // inferred from electronic annotation///0016021 // integral component of membrane // inferred from electronic …	0005044 // scavenger receptor activity // inferred from electronic annotation///0005515 // protein binding // inferred from physical interaction///0030169 // low-density lipoprotein particle binding // inferred from sequence or structural similarity	chr8:15965284-16035503 (-) // 89.18 // p22
202376_at	0.0018469832	-1.0906639	-0.12520668	1.0906639	down	-1.0288185	-0.04098854	1.0288185	down	2.1473053	1.1025273	2.1473053	up	1.1662915	0.22192834	1.1662915	up	SERPINA3	12	0006953 // acute-phase response // inferred from electronic annotation///0006954 // inflammatory response // non-traceable author statement///0010466 // negative regulation of peptidase activity // inferred from electronic annotation///0010951 // negative regulation of endopeptidase activity // not recorded///0019216 // regulation of lipid metabolic process // non-traceable author statement///003…	0005576 // extracellular region // non-traceable author statement///0005615 // extracellular space // inferred from direct assay///0005622 // intracellular // non-traceable author statement///0005634 // nucleus // traceable author statement///0070062 // extracellular exosome // inferred from direct assay///0072562 // blood microparticle // inferred from direct assay	0003677 // DNA binding // traceable author statement///0004867 // serine-type endopeptidase inhibitor activity // traceable author statement///0005515 // protein binding // inferred from physical interaction///0030414 // peptidase inhibitor activity // inferred from electronic annotation	chr14:95080767-95090391 (+) // 98.11 // q32.13
213692_s_at	0.040674817	-1.092941	-0.12821558	1.092941	down	1.0580823	0.08145198	1.0580823	up	-1.0314237	-0.044637065	1.0314237	down	1.1248487	0.16973092	1.1248487	up	VDR	7421	0000122 // negative regulation of transcription from RNA polymerase II promoter // inferred from direct assay///0000902 // cell morphogenesis // inferred from mutant phenotype///0001501 // skeletal system development // inferred from electronic annotation///0006367 // transcription initiation from RNA polymerase II promoter // traceable author statement///0006816 // calcium ion transport // infer…	0005634 // nucleus // inferred from direct assay///0005654 // nucleoplasm // inferred from direct assay///0005654 // nucleoplasm // traceable author statement///0043235 // receptor complex // inferred from direct assay///0090575 // RNA polymerase II transcription factor complex // inferred from direct assay	0003677 // DNA binding // inferred from direct assay///0003700 // transcription factor activity, sequence-specific DNA binding // inferred from direct assay///0003707 // steroid hormone receptor activity // inferred from electronic annotation///0005515 // protein binding // inferred from physical interaction///0008270 // zinc ion binding // inferred from electronic annotation///0008434 // calcitr…	chr12:48236426-48237139 (+) // 38.73 // q13.11
202962_at	0.0051744026	-1.1021229	-0.14028516	1.1021229	down	-1.533475	-0.6168047	1.533475	down	-1.346026	-0.42870617	1.346026	down	-1.8416951	-0.88103426	1.8416951	down	KIF13B	23303	0006605 // protein targeting // traceable author statement///0007018 // microtubule-based movement // not recorded///0007018 // microtubule-based movement // traceable author statement///0007165 // signal transduction // non-traceable author statement///0008152 // metabolic process // inferred from electronic annotation///0042110 // T cell activation // non-traceable author statement///0050770 //…	0005737 // cytoplasm // inferred from direct assay///0005856 // cytoskeleton // inferred from electronic annotation///0005871 // kinesin complex // not recorded///0005874 // microtubule // inferred from electronic annotation///0030424 // axon // inferred from direct assay///0042995 // cell projection // inferred from electronic annotation	0000166 // nucleotide binding // inferred from electronic annotation///0003777 // microtubule motor activity // not recorded///0003777 // microtubule motor activity // non-traceable author statement///0005515 // protein binding // inferred from physical interaction///0005524 // ATP binding // inferred from electronic annotation///0008017 // microtubule binding // inferred from electronic annotati…	chr8:28924795-29120588 (-) // 99.13 // p12
217562_at	0.014908235	-1.1034939	-0.14207864	1.1034939	down	-1.1911337	-0.25233534	1.1911337	down	-1.1143459	-0.15619712	1.1143459	down	-1.1638999	-0.218967	1.1638999	down	BRINP3	339479	0007049 // cell cycle // inferred from electronic annotation///0007050 // cell cycle arrest // inferred from electronic annotation///0007399 // nervous system development // inferred from electronic annotation///0045666 // positive regulation of neuron differentiation // inferred from sequence or structural similarity///0045786 // negative regulation of cell cycle // inferred from electronic anno…	0005576 // extracellular region // inferred from electronic annotation///0005739 // mitochondrion // inferred from electronic annotation///0005783 // endoplasmic reticulum // inferred from electronic annotation///0030425 // dendrite // inferred from electronic annotation///0043025 // neuronal cell body // inferred from electronic annotation		chr1:190066796-190067258 (-) // 96.45 // q31.1
217026_at	0.022770274	-1.1152811	-0.1574074	1.1152811	down	1.0260214	0.037060738	1.0260214	up	-1.1045047	-0.1433996	1.1045047	down	1.1445044	0.19472302	1.1445044	up	CFTR	1080	0006695 // cholesterol biosynthetic process // inferred from electronic annotation///0006810 // transport // traceable author statement///0006811 // ion transport // inferred from electronic annotation///0006821 // chloride transport // inferred from electronic annotation///0006904 // vesicle docking involved in exocytosis // inferred from electronic annotation///0007264 // small GTPase mediated …	0005737 // cytoplasm // inferred from direct assay///0005765 // lysosomal membrane // traceable author statement///0005768 // endosome // inferred from electronic annotation///0005769 // early endosome // inferred from direct assay///0005829 // cytosol // inferred from direct assay///0005886 // plasma membrane // inferred from direct assay///0005886 // plasma membrane // traceable author statemen…	0000166 // nucleotide binding // inferred from electronic annotation///0005224 // ATP-binding and phosphorylation-dependent chloride channel activity // traceable author statement///0005254 // chloride channel activity // inferred from direct assay///0005254 // chloride channel activity // inferred from mutant phenotype///0005260 // channel-conductance-controlling ATPase activity // non-traceable…	chr7:117305561-117306961 (+) // 100.0 // q31.2
200602_at	0.028663699	-1.1208153	-0.16454853	1.1208153	down	1.1383653	0.1869635	1.1383653	up	-1.19041	-0.25145862	1.19041	down	-1.8455424	-0.8840449	1.8455424	down	APP	351	0001878 // response to yeast // inferred from mutant phenotype///0001967 // suckling behavior // inferred from electronic annotation///0002576 // platelet degranulation // traceable author statement///0006378 // mRNA polyadenylation // inferred from sequence or structural similarity///0006417 // regulation of translation // inferred from sequence or structural similarity///0006468 // protein phos…	0005576 // extracellular region // traceable author statement///0005615 // extracellular space // inferred from direct assay///0005641 // nuclear envelope lumen // inferred from direct assay///0005737 // cytoplasm // inferred from direct assay///0005737 // cytoplasm // inferred from sequence or structural similarity///0005768 // endosome // inferred from direct assay///0005790 // smooth endoplasm…	0003677 // DNA binding // inferred from sequence or structural similarity///0004867 // serine-type endopeptidase inhibitor activity // inferred from direct assay///0005102 // receptor binding // inferred from physical interaction///0005515 // protein binding // inferred from physical interaction///0008201 // heparin binding // inferred from electronic annotation///0008233 // peptidase activity //…	chr21:27252861-27543085 (-) // 95.14 // q21.3
210369_at	0.001728318	-1.1282195	-0.1740477	1.1282195	down	1.1091708	0.14948155	1.1091708	up	1.260546	0.33404875	1.260546	up	1.3818078	0.4665569	1.3818078	up	SWAP70	23075	0007204 // positive regulation of cytosolic calcium ion concentration // inferred from electronic annotation///0008064 // regulation of actin polymerization or depolymerization // inferred from electronic annotation///0016444 // somatic cell DNA recombination // inferred from electronic annotation///0030835 // negative regulation of actin filament depolymerization // inferred from electronic anno…	0005634 // nucleus // inferred from electronic annotation///0005737 // cytoplasm // inferred from electronic annotation///0005829 // cytosol // inferred from electronic annotation///0005886 // plasma membrane // inferred from electronic annotation///0016020 // membrane // inferred from electronic annotation///0030027 // lamellipodium // inferred from electronic annotation///0042995 // cell projec…	0003677 // DNA binding // inferred from electronic annotation///0005509 // calcium ion binding // inferred from electronic annotation///0005515 // protein binding // inferred from physical interaction///0005524 // ATP binding // inferred from electronic annotation	chr11:9685681-9763485 (+) // 94.84 // p15.4
214045_at	0.009856609	-1.1336164	-0.18093258	1.1336164	down	-1.5023326	-0.58720416	1.5023326	down	-1.4088081	-0.49447513	1.4088081	down	-1.5145217	-0.59886223	1.5145217	down	LIAS	11019	0001843 // neural tube closure // inferred from electronic annotation///0006954 // inflammatory response // inferred from sequence or structural similarity///0006979 // response to oxidative stress // inferred from sequence or structural similarity///0009107 // lipoate biosynthetic process // not recorded///0009107 // lipoate biosynthetic process // inferred from sequence or structural similarity…	0005739 // mitochondrion // not recorded///0005739 // mitochondrion // inferred from sequence or structural similarity	0003824 // catalytic activity // inferred from electronic annotation///0016740 // transferase activity // inferred from electronic annotation///0016783 // sulfurtransferase activity // inferred from electronic annotation///0016992 // lipoate synthase activity // not recorded///0016992 // lipoate synthase activity // inferred from sequence or structural similarity///0046872 // metal ion binding //…	chr4:39460675-39479269 (+) // 81.19 // p14
209941_at	9.672233E-4	-1.1550452	-0.20794925	1.1550452	down	-1.3517271	-0.4348039	1.3517271	down	-1.0677667	-0.09459647	1.0677667	down	-1.6529082	-0.72500664	1.6529082	down	RIPK1	8737	0001934 // positive regulation of protein phosphorylation // inferred from mutant phenotype///0002224 // toll-like receptor signaling pathway // traceable author statement///0002756 // MyD88-independent toll-like receptor signaling pathway // traceable author statement///0006468 // protein phosphorylation // inferred from electronic annotation///0006915 // apoptotic process // inferred from mutan…	0005737 // cytoplasm // inferred from direct assay///0005739 // mitochondrion // inferred from direct assay///0005829 // cytosol // traceable author statement///0005886 // plasma membrane // inferred from electronic annotation///0016020 // membrane // inferred from electronic annotation///0031264 // death-inducing signaling complex // inferred from direct assay///0043234 // protein complex // inf…	0000166 // nucleotide binding // inferred from electronic annotation///0004672 // protein kinase activity // inferred from direct assay///0004672 // protein kinase activity // inferred from mutant phenotype///0004674 // protein serine/threonine kinase activity // inferred from direct assay///0005123 // death receptor binding // inferred from physical interaction///0005515 // protein binding // in…	chr6:3077057-3114174 (+) // 94.76 // p25.2
201888_s_at	0.0035317151	-1.1559874	-0.2091257	1.1559874	down	-1.2009476	-0.2641733	1.2009476	down	-1.0873392	-0.12080195	1.0873392	down	-1.5687935	-0.64965546	1.5687935	down	IL13RA1	3597	0002639 // positive regulation of immunoglobulin production // inferred from electronic annotation///0007166 // cell surface receptor signaling pathway // traceable author statement///0019221 // cytokine-mediated signaling pathway // inferred from electronic annotation///0030890 // positive regulation of B cell proliferation // inferred from electronic annotation///0035772 // interleukin-13-media…	0005886 // plasma membrane // traceable author statement///0005898 // interleukin-13 receptor complex // traceable author statement///0016020 // membrane // inferred from electronic annotation///0016021 // integral component of membrane // inferred from electronic annotation	0004896 // cytokine receptor activity // inferred from electronic annotation///0005515 // protein binding // inferred from physical interaction///0016515 // interleukin-13 receptor activity // inferred from electronic annotation	chrX:117861564-117926198 (+) // 98.13 // q24
214486_x_at	0.020565666	-1.1746892	-0.23227908	1.1746892	down	-1.2462841	-0.31763303	1.2462841	down	-1.0292823	-0.04163871	1.0292823	down	-1.388584	-0.47361445	1.388584	down	CFLAR	8837	0006508 // proteolysis // inferred from electronic annotation///0006915 // apoptotic process // inferred from mutant phenotype///0006915 // apoptotic process // traceable author statement///0006919 // activation of cysteine-type endopeptidase activity involved in apoptotic process // not recorded///0007519 // skeletal muscle tissue development // inferred from sequence or structural similarity///…	0005737 // cytoplasm // inferred from direct assay///0005829 // cytosol // traceable author statement///0031264 // death-inducing signaling complex // inferred from direct assay///0031265 // CD95 death-inducing signaling complex // inferred from electronic annotation///0045121 // membrane raft // inferred from electronic annotation///0097342 // ripoptosome // inferred from direct assay	0002020 // protease binding // inferred from physical interaction///0004197 // cysteine-type endopeptidase activity // inferred from electronic annotation///0005123 // death receptor binding // inferred from electronic annotation///0005515 // protein binding // inferred from physical interaction///0008047 // enzyme activator activity // inferred from direct assay///0008234 // cysteine-type peptid…	chr2:202004908-202028695 (+) // 76.44 // q33.1
208641_s_at	0.037748463	-1.186385	-0.24657233	1.186385	down	1.1308619	0.17742276	1.1308619	up	-1.2450669	-0.3162233	1.2450669	down	1.1217794	0.16578898	1.1217794	up	RAC1	5879	0001934 // positive regulation of protein phosphorylation // inferred from mutant phenotype///0002093 // auditory receptor cell morphogenesis // inferred from electronic annotation///0002551 // mast cell chemotaxis // inferred from electronic annotation///0003382 // epithelial cell morphogenesis // inferred from electronic annotation///0006897 // endocytosis // inferred from electronic annotation…	0000139 // Golgi membrane // inferred from electronic annotation///0001891 // phagocytic cup // inferred from electronic annotation///0005622 // intracellular // inferred from electronic annotation///0005634 // nucleus // inferred from electronic annotation///0005737 // cytoplasm // inferred from direct assay///0005789 // endoplasmic reticulum membrane // traceable author statement///0005802 // t…	0000166 // nucleotide binding // inferred from electronic annotation///0003924 // GTPase activity // traceable author statement///0005515 // protein binding // inferred from physical interaction///0005525 // GTP binding // inferred from direct assay///0005525 // GTP binding // inferred from mutant phenotype///0017137 // Rab GTPase binding // inferred from electronic annotation///0019899 // enzyme…	chr7:6414228-6442133 (+) // 88.64 // p22.1///chr4:46725790-46726563 (-) // 88.13 // p12
220108_at	0.00892536	-1.2085571	-0.2732857	1.2085571	down	-1.5932375	-0.6719613	1.5932375	down	-1.2360138	-0.3056948	1.2360138	down	-1.7809778	-0.83266956	1.7809778	down	GNA14	9630	0007165 // signal transduction // traceable author statement///0007186 // G-protein coupled receptor signaling pathway // inferred from electronic annotation///0007188 // adenylate cyclase-modulating G-protein coupled receptor signaling pathway // not recorded///0007596 // blood coagulation // traceable author statement///0008152 // metabolic process // inferred from electronic annotation///00301…	0005834 // heterotrimeric G-protein complex // not recorded///0005886 // plasma membrane // traceable author statement///0070062 // extracellular exosome // inferred from direct assay	0000166 // nucleotide binding // inferred from electronic annotation///0001664 // G-protein coupled receptor binding // not recorded///0003924 // GTPase activity // not recorded///0004871 // signal transducer activity // not recorded///0005515 // protein binding // inferred from physical interaction///0005525 // GTP binding // inferred from electronic annotation///0019001 // guanyl nucleotide bin…	chr9:80038442-80262847 (-) // 99.94 // q21.2
202419_at	0.009027126	-1.2139026	-0.27965268	1.2139026	down	-1.1460596	-0.19668217	1.1460596	down	-1.0288212	-0.04099228	1.0288212	down	-1.7411586	-0.80004764	1.7411586	down	KDSR	2531	0006629 // lipid metabolic process // inferred from electronic annotation///0006665 // sphingolipid metabolic process // traceable author statement///0006666 // 3-keto-sphinganine metabolic process // inferred from direct assay///0008152 // metabolic process // inferred from electronic annotation///0030148 // sphingolipid biosynthetic process // traceable author statement///0044281 // small molec…	0005615 // extracellular space // traceable author statement///0005783 // endoplasmic reticulum // inferred from direct assay///0005789 // endoplasmic reticulum membrane // traceable author statement///0016020 // membrane // inferred from direct assay///0016021 // integral component of membrane // inferred from electronic annotation	0016491 // oxidoreductase activity // inferred from electronic annotation///0047560 // 3-dehydrosphinganine reductase activity // inferred from direct assay	chr18:60997832-61034458 (-) // 93.79 // q21.33
201701_s_at	8.184927E-4	-1.2349558	-0.3044594	1.2349558	down	-1.2735767	-0.34888583	1.2735767	down	-1.1686354	-0.2248248	1.1686354	down	-1.5546613	-0.63660026	1.5546613	down	PGRMC2	10424	0043401 // steroid hormone mediated signaling pathway // traceable author statement	0012505 // endomembrane system // not recorded///0016020 // membrane // inferred from direct assay///0016021 // integral component of membrane // inferred from electronic annotation	0003707 // steroid hormone receptor activity // traceable author statement///0005496 // steroid binding // inferred from electronic annotation///0008289 // lipid binding // inferred from electronic annotation///0020037 // heme binding // not recorded	chr4:129191298-129208948 (-) // 88.63 // q28.2
211612_s_at	0.020551499	-1.2380846	-0.30810982	1.2380846	down	-1.0333339	-0.04730657	1.0333339	down	-1.3009557	-0.37957174	1.3009557	down	-1.8642778	-0.8986169	1.8642778	down	IL13RA1	3597	0002639 // positive regulation of immunoglobulin production // inferred from electronic annotation///0007166 // cell surface receptor signaling pathway // traceable author statement///0019221 // cytokine-mediated signaling pathway // inferred from electronic annotation///0030890 // positive regulation of B cell proliferation // inferred from electronic annotation///0035772 // interleukin-13-media…	0005886 // plasma membrane // traceable author statement///0005898 // interleukin-13 receptor complex // traceable author statement///0016020 // membrane // inferred from electronic annotation///0016021 // integral component of membrane // inferred from electronic annotation	0004896 // cytokine receptor activity // inferred from electronic annotation///0005515 // protein binding // inferred from physical interaction///0016515 // interleukin-13 receptor activity // inferred from electronic annotation	chrX:117861570-117925971 (+) // 91.6 // q24
202709_at	0.01739943	-1.2688915	-0.3435687	1.2688915	down	-1.1651996	-0.22057721	1.1651996	down	1.3602841	0.44390798	1.3602841	up	-1.2279526	-0.29625493	1.2279526	down	FMOD	2331	0005975 // carbohydrate metabolic process // traceable author statement///0007181 // transforming growth factor beta receptor complex assembly // traceable author statement///0018146 // keratan sulfate biosynthetic process // traceable author statement///0030198 // extracellular matrix organization // traceable author statement///0030203 // glycosaminoglycan metabolic process // traceable author …	0005576 // extracellular region // traceable author statement///0005578 // proteinaceous extracellular matrix // inferred from electronic annotation///0005615 // extracellular space // inferred from direct assay///0005796 // Golgi lumen // traceable author statement///0031012 // extracellular matrix // inferred from direct assay///0043202 // lysosomal lumen // traceable author statement	0005515 // protein binding // inferred from electronic annotation///0008201 // heparin binding // not recorded///0048495 // Roundabout binding // not recorded	chr1:203309756-203317403 (-) // 98.95 // q32.1
205150_s_at	0.015816726	-1.3052803	-0.38435966	1.3052803	down	-1.1870042	-0.24732512	1.1870042	down	1.3673073	0.45133752	1.3673073	up	-1.307841	-0.38718712	1.307841	down	TRIL	9865	0002376 // immune system process // inferred from electronic annotation///0002718 // regulation of cytokine production involved in immune response // inferred from direct assay///0006954 // inflammatory response // inferred from electronic annotation///0034142 // toll-like receptor 4 signaling pathway // inferred from direct assay///0045087 // innate immune response // inferred from electronic an…	0016020 // membrane // inferred from electronic annotation///0016021 // integral component of membrane // inferred from electronic annotation///0046696 // lipopolysaccharide receptor complex // inferred from direct assay	0001530 // lipopolysaccharide binding // inferred from direct assay///0005515 // protein binding // inferred from electronic annotation	chr7:28992975-28997908 (-) // 98.87 // p14.3
220565_at	0.048239276	-1.3274032	-0.4086067	1.3274032	down	-1.6106731	-0.68766373	1.6106731	down	-1.0365703	-0.051817954	1.0365703	down	-1.6201708	-0.6961459	1.6201708	down	CCR10	2826	0006935 // chemotaxis // inferred from electronic annotation///0006955 // immune response // inferred from electronic annotation///0007165 // signal transduction // inferred from electronic annotation///0007186 // G-protein coupled receptor signaling pathway // inferred from electronic annotation///0007204 // positive regulation of cytosolic calcium ion concentration // inferred from electronic a…	0005829 // cytosol // inferred from electronic annotation///0005886 // plasma membrane // traceable author statement///0005887 // integral component of plasma membrane // traceable author statement///0009986 // cell surface // inferred from direct assay///0016020 // membrane // inferred from electronic annotation///0016021 // integral component of membrane // inferred from electronic annotation	0004871 // signal transducer activity // inferred from electronic annotation///0004930 // G-protein coupled receptor activity // traceable author statement///0004950 // chemokine receptor activity // inferred from electronic annotation///0016493 // C-C chemokine receptor activity // inferred from electronic annotation	chr17:40831435-40833845 (-) // 96.06 // q21.2
204518_s_at	0.0014497811	-1.3498745	-0.43282527	1.3498745	down	-1.5859733	-0.66536844	1.5859733	down	-1.1887013	-0.24938615	1.1887013	down	-1.8098911	-0.8559029	1.8098911	down	PPIC	5480	0000413 // protein peptidyl-prolyl isomerization // not recorded///0006457 // protein folding // inferred from electronic annotation	0005737 // cytoplasm // inferred from electronic annotation///0070062 // extracellular exosome // inferred from direct assay	0003755 // peptidyl-prolyl cis-trans isomerase activity // not recorded///0005515 // protein binding // inferred from physical interaction///0016018 // cyclosporin A binding // inferred from direct assay///0016853 // isomerase activity // inferred from electronic annotation///0042277 // peptide binding // inferred from electronic annotation	chr5:122359489-122372401 (-) // 86.52 // q23.2
203450_at	0.012627786	-1.3752024	-0.45964402	1.3752024	down	-1.2356163	-0.3052309	1.2356163	down	-1.278171	-0.35408077	1.278171	down	-1.6709708	-0.7406865	1.6709708	down	CBY1	25776	0008104 // protein localization // inferred from mutant phenotype///0030154 // cell differentiation // inferred from electronic annotation///0030178 // negative regulation of Wnt signaling pathway // inferred from direct assay///0042384 // cilium assembly // inferred from electronic annotation///0045444 // fat cell differentiation // inferred from sequence or structural similarity///0045892 // ne…	0005634 // nucleus // inferred from direct assay///0005654 // nucleoplasm // traceable author statement///0005794 // Golgi apparatus // inferred from electronic annotation///0005802 // trans-Golgi network // inferred from direct assay///0005829 // cytosol // traceable author statement///0016607 // nuclear speck // inferred from electronic annotation///0036064 // ciliary basal body // inferred fro…	0005515 // protein binding // inferred from physical interaction///0008013 // beta-catenin binding // inferred from direct assay///0008013 // beta-catenin binding // inferred from physical interaction///0042802 // identical protein binding // inferred from physical interaction	chr22:39052678-39069856 (+) // 100.0 // q13.1
213456_at	0.018957552	-1.380901	-0.4656099	1.380901	down	-1.6946176	-0.76095974	1.6946176	down	-1.46512	-0.5510188	1.46512	down	-1.775529	-0.828249	1.775529	down	SOSTDC1	25928	0007389 // pattern specification process // inferred from electronic annotation///0010454 // negative regulation of cell fate commitment // inferred from electronic annotation///0016055 // Wnt signaling pathway // inferred from electronic annotation///0030514 // negative regulation of BMP signaling pathway // inferred from electronic annotation///0031069 // hair follicle morphogenesis // inferred…	0005576 // extracellular region // inferred from electronic annotation///0005615 // extracellular space // inferred from electronic annotation	0005515 // protein binding // inferred from electronic annotation	chr7:16501168-16505474 (-) // 94.7 // p21.1
219132_at	0.0021975606	-1.3873658	-0.4723483	1.3873658	down	-1.7446712	-0.80295515	1.7446712	down	-1.2468363	-0.3182721	1.2468363	down	-1.3484423	-0.43129382	1.3484423	down	PELI2	57161	0001934 // positive regulation of protein phosphorylation // inferred from direct assay///0002224 // toll-like receptor signaling pathway // traceable author statement///0002755 // MyD88-dependent toll-like receptor signaling pathway // traceable author statement///0008063 // Toll signaling pathway // inferred from electronic annotation///0016567 // protein ubiquitination // inferred from electro…	0005829 // cytosol // traceable author statement///0016020 // membrane // inferred from electronic annotation///0016021 // integral component of membrane // inferred from electronic annotation	0005515 // protein binding // inferred from physical interaction///0016874 // ligase activity // inferred from electronic annotation	chr14:56585202-56768020 (+) // 98.87 // q22.3
218191_s_at	0.0021449493	-1.3891048	-0.4741555	1.3891048	down	-1.5565147	-0.63831925	1.5565147	down	-1.3542901	-0.43753687	1.3542901	down	-1.9857383	-0.98967546	1.9857383	down	LMBRD1	55788	0006766 // vitamin metabolic process // traceable author statement///0006767 // water-soluble vitamin metabolic process // traceable author statement///0006810 // transport // inferred from electronic annotation///0009235 // cobalamin metabolic process // traceable author statement///0016032 // viral process // inferred from electronic annotation///0038016 // insulin receptor internalization // i…	0005764 // lysosome // inferred from electronic annotation///0005765 // lysosomal membrane // traceable author statement///0005886 // plasma membrane // inferred from electronic annotation///0016020 // membrane // inferred from direct assay///0016021 // integral component of membrane // inferred from electronic annotation///0045334 // clathrin-coated endocytic vesicle // inferred from electronic …	0005158 // insulin receptor binding // inferred from electronic annotation///0031419 // cobalamin binding // inferred from electronic annotation	chr6:70385750-70506798 (-) // 99.95 // q13
203233_at	0.0370794	-1.3960422	-0.48134258	1.3960422	down	-1.4503256	-0.5363768	1.4503256	down	-1.1047838	-0.14376405	1.1047838	down	-1.0747209	-0.103962064	1.0747209	down	IL4R	3566	0002376 // immune system process // inferred from electronic annotation///0002532 // production of molecular mediator involved in inflammatory response // inferred from electronic annotation///0002639 // positive regulation of immunoglobulin production // inferred from electronic annotation///0006955 // immune response // traceable author statement///0007165 // signal transduction // traceable au…	0005576 // extracellular region // inferred from electronic annotation///0005615 // extracellular space // inferred from electronic annotation///0005622 // intracellular // traceable author statement///0005886 // plasma membrane // inferred from electronic annotation///0005887 // integral component of plasma membrane // traceable author statement///0016020 // membrane // inferred from electronic …	0004896 // cytokine receptor activity // inferred from electronic annotation///0004913 // interleukin-4 receptor activity // traceable author statement///0005057 // receptor signaling protein activity // traceable author statement///0005515 // protein binding // inferred from physical interaction	chr16:27351108-27376095 (+) // 95.66 // p12.1
210993_s_at	0.013314703	-1.4124501	-0.49819982	1.4124501	down	-1.7161063	-0.7791389	1.7161063	down	-1.083066	-0.115121104	1.083066	down	-1.544115	-0.62678015	1.544115	down	SMAD1	4086	0000165 // MAPK cascade // inferred from electronic annotation///0001657 // ureteric bud development // inferred from electronic annotation///0001710 // mesodermal cell fate commitment // inferred from electronic annotation///0001822 // kidney development // inferred from electronic annotation///0002051 // osteoblast fate commitment // inferred from electronic annotation///0006351 // transcriptio…	0005622 // intracellular // non-traceable author statement///0005634 // nucleus // inferred from direct assay///0005634 // nucleus // non-traceable author statement///0005634 // nucleus // traceable author statement///0005637 // nuclear inner membrane // inferred from direct assay///0005654 // nucleoplasm // traceable author statement///0005667 // transcription factor complex // inferred from ele…	0000978 // RNA polymerase II core promoter proximal region sequence-specific DNA binding // inferred from direct assay///0000979 // RNA polymerase II core promoter sequence-specific DNA binding // inferred from electronic annotation///0001077 // transcriptional activator activity, RNA polymerase II core promoter proximal region sequence-specific binding // inferred from direct assay///0003677 // …	chr4:146403956-146479106 (+) // 99.94 // q31.21
212271_at	0.006767732	-1.4136534	-0.49942842	1.4136534	down	-1.2346159	-0.30406228	1.2346159	down	-1.2193929	-0.286163	1.2193929	down	-1.7882689	-0.8385637	1.7882689	down	MAPK1	5594	0000165 // MAPK cascade // traceable author statement///0000186 // activation of MAPKK activity // traceable author statement///0000187 // activation of MAPK activity // traceable author statement///0000189 // MAPK import into nucleus // inferred from electronic annotation///0002224 // toll-like receptor signaling pathway // traceable author statement///0002755 // MyD88-dependent toll-like recept…	0005622 // intracellular // inferred from electronic annotation///0005634 // nucleus // inferred from direct assay///0005634 // nucleus // traceable author statement///0005654 // nucleoplasm // inferred from direct assay///0005654 // nucleoplasm // traceable author statement///0005737 // cytoplasm // inferred from direct assay///0005737 // cytoplasm // inferred from sequence or structural similar…	0000166 // nucleotide binding // inferred from electronic annotation///0001784 // phosphotyrosine binding // inferred from electronic annotation///0003677 // DNA binding // inferred from electronic annotation///0004672 // protein kinase activity // inferred from electronic annotation///0004674 // protein serine/threonine kinase activity // inferred from direct assay///0004707 // MAP kinase activi…	chr22:22116311-22221722 (-) // 96.48 // q11.21
211317_s_at	0.020974454	-1.4230878	-0.5090247	1.4230878	down	-1.5734301	-0.653913	1.5734301	down	-1.1707484	-0.22743095	1.1707484	down	-1.447156	-0.5332204	1.447156	down	CFLAR	8837	0006508 // proteolysis // inferred from electronic annotation///0006915 // apoptotic process // inferred from mutant phenotype///0006915 // apoptotic process // traceable author statement///0006919 // activation of cysteine-type endopeptidase activity involved in apoptotic process // not recorded///0007519 // skeletal muscle tissue development // inferred from sequence or structural similarity///…	0005737 // cytoplasm // inferred from direct assay///0005829 // cytosol // traceable author statement///0031264 // death-inducing signaling complex // inferred from direct assay///0031265 // CD95 death-inducing signaling complex // inferred from electronic annotation///0045121 // membrane raft // inferred from electronic annotation///0097342 // ripoptosome // inferred from direct assay	0002020 // protease binding // inferred from physical interaction///0004197 // cysteine-type endopeptidase activity // inferred from electronic annotation///0005123 // death receptor binding // inferred from electronic annotation///0005515 // protein binding // inferred from physical interaction///0008047 // enzyme activator activity // inferred from direct assay///0008234 // cysteine-type peptid…	chr2:201994676-202028610 (+) // 93.09 // q33.1
211561_x_at	0.012011967	-1.437644	-0.5237065	1.437644	down	-1.0680622	-0.09499562	1.0680622	down	-1.150076	-0.20172922	1.150076	down	-1.6002554	-0.6783021	1.6002554	down	MAPK14	1432	0000077 // DNA damage checkpoint // inferred from electronic annotation///0000165 // MAPK cascade // inferred from electronic annotation///0000187 // activation of MAPK activity // traceable author statement///0000902 // cell morphogenesis // inferred from electronic annotation///0001502 // cartilage condensation // inferred from electronic annotation///0001525 // angiogenesis // inferred from el…	0000922 // spindle pole // inferred from electronic annotation///0005622 // intracellular // inferred from electronic annotation///0005623 // cell // inferred from electronic annotation///0005634 // nucleus // inferred from sequence or structural similarity///0005654 // nucleoplasm // inferred from direct assay///0005654 // nucleoplasm // traceable author statement///0005737 // cytoplasm // infer…	0000166 // nucleotide binding // inferred from electronic annotation///0004672 // protein kinase activity // inferred from electronic annotation///0004674 // protein serine/threonine kinase activity // traceable author statement///0004707 // MAP kinase activity // inferred from direct assay///0004708 // MAP kinase kinase activity // traceable author statement///0005515 // protein binding // infer…	chr6:35995916-36076386 (+) // 79.34 // p21.31
203845_at	3.8651753E-5	-1.4478694	-0.5339315	1.4478694	down	-1.9007565	-0.92657375	1.9007565	down	-1.0970533	-0.13363361	1.0970533	down	-1.9486014	-0.96243894	1.9486014	down	KAT2B	8850	0006325 // chromatin organization // traceable author statement///0006338 // chromatin remodeling // inferred from direct assay///0006338 // chromatin remodeling // non-traceable author statement///0006351 // transcription, DNA-templated // inferred from electronic annotation///0006355 // regulation of transcription, DNA-templated // inferred from electronic annotation///0006360 // transcription …	0000123 // histone acetyltransferase complex // inferred from electronic annotation///0000125 // PCAF complex // non-traceable author statement///0000776 // kinetochore // inferred from electronic annotation///0000790 // nuclear chromatin // inferred from electronic annotation///0005634 // nucleus // inferred from sequence or structural similarity///0005654 // nucleoplasm // traceable author stat…	0000977 // RNA polymerase II regulatory region sequence-specific DNA binding // inferred from electronic annotation///0003682 // chromatin binding // inferred from electronic annotation///0003712 // transcription cofactor activity // inferred from physical interaction///0003713 // transcription coactivator activity // inferred from direct assay///0004402 // histone acetyltransferase activity // i…	chr3:20081523-20195896 (+) // 91.18 // p24.3
213227_at	0.005059603	-1.4524479	-0.53848636	1.4524479	down	-1.5611926	-0.6426486	1.5611926	down	-1.244873	-0.3159986	1.244873	down	-1.7716298	-0.8250772	1.7716298	down	PGRMC2	10424	0043401 // steroid hormone mediated signaling pathway // traceable author statement	0012505 // endomembrane system // not recorded///0016020 // membrane // inferred from direct assay///0016021 // integral component of membrane // inferred from electronic annotation	0003707 // steroid hormone receptor activity // traceable author statement///0005496 // steroid binding // inferred from electronic annotation///0008289 // lipid binding // inferred from electronic annotation///0020037 // heme binding // not recorded	chr4:129190404-129191837 (-) // 98.02 // q28.2
205979_at	0.026042767	-1.4786224	-0.56425375	1.4786224	down	-2.2134416	-1.1462914	2.2134416	down	-1.6949437	-0.7612373	1.6949437	down	-2.2444785	-1.1663803	2.2444785	down	SCGB2A1	4246	0030521 // androgen receptor signaling pathway // inferred from direct assay	0005615 // extracellular space // inferred from direct assay	0046982 // protein heterodimerization activity // inferred from direct assay	chr11:61976139-61981408 (+) // 100.0 // q12.3
206170_at	0.0019715386	-1.5076939	-0.5923435	1.5076939	down	-1.2685688	-0.3432017	1.2685688	down	-1.1683011	-0.22441216	1.1683011	down	-1.405788	-0.491379	1.405788	down	ADRB2	154	0001666 // response to hypoxia // inferred from electronic annotation///0001889 // liver development // inferred from electronic annotation///0001993 // regulation of systemic arterial blood pressure by norepinephrine-epinephrine // inferred from electronic annotation///0002024 // diet induced thermogenesis // inferred from electronic annotation///0002025 // vasodilation by norepinephrine-epineph…	0005634 // nucleus // inferred from electronic annotation///0005737 // cytoplasm // inferred from electronic annotation///0005764 // lysosome // traceable author statement///0005768 // endosome // inferred from electronic annotation///0005886 // plasma membrane // inferred from direct assay///0005886 // plasma membrane // traceable author statement///0005887 // integral component of plasma membra…	0001965 // G-protein alpha-subunit binding // inferred from electronic annotation///0004871 // signal transducer activity // inferred from electronic annotation///0004930 // G-protein coupled receptor activity // inferred from electronic annotation///0004935 // adrenergic receptor activity // inferred from electronic annotation///0004941 // beta2-adrenergic receptor activity // inferred from dire…	chr5:148204807-148208254 (+) // 92.93 // q32
210449_x_at	0.039488226	-1.5636652	-0.64493155	1.5636652	down	-1.0947498	-0.13060115	1.0947498	down	-1.1107326	-0.15151142	1.1107326	down	-1.3830116	-0.46781325	1.3830116	down	MAPK14	1432	0000077 // DNA damage checkpoint // inferred from electronic annotation///0000165 // MAPK cascade // inferred from electronic annotation///0000187 // activation of MAPK activity // traceable author statement///0000902 // cell morphogenesis // inferred from electronic annotation///0001502 // cartilage condensation // inferred from electronic annotation///0001525 // angiogenesis // inferred from el…	0000922 // spindle pole // inferred from electronic annotation///0005622 // intracellular // inferred from electronic annotation///0005623 // cell // inferred from electronic annotation///0005634 // nucleus // inferred from sequence or structural similarity///0005654 // nucleoplasm // inferred from direct assay///0005654 // nucleoplasm // traceable author statement///0005737 // cytoplasm // infer…	0000166 // nucleotide binding // inferred from electronic annotation///0004672 // protein kinase activity // inferred from electronic annotation///0004674 // protein serine/threonine kinase activity // traceable author statement///0004707 // MAP kinase activity // inferred from direct assay///0004708 // MAP kinase kinase activity // traceable author statement///0005515 // protein binding // infer…	chr6:35995919-36076261 (+) // 100.0 // p21.31
218421_at	0.030435	-1.5816114	-0.66139513	1.5816114	down	-1.246726	-0.3181444	1.246726	down	-1.328392	-0.40968096	1.328392	down	-1.2673222	-0.3417833	1.2673222	down	CERK	64781	0006665 // sphingolipid metabolic process // traceable author statement///0006672 // ceramide metabolic process // inferred from direct assay///0006672 // ceramide metabolic process // traceable author statement///0006687 // glycosphingolipid metabolic process // traceable author statement///0016310 // phosphorylation // inferred from electronic annotation///0044281 // small molecule metabolic pr…	0005737 // cytoplasm // inferred from electronic annotation///0005739 // mitochondrion // inferred from electronic annotation///0005886 // plasma membrane // traceable author statement///0016020 // membrane // inferred from electronic annotation///0016021 // integral component of membrane // inferred from direct assay	0000166 // nucleotide binding // inferred from electronic annotation///0000287 // magnesium ion binding // inferred from direct assay///0001729 // ceramide kinase activity // inferred from direct assay///0005515 // protein binding // inferred from physical interaction///0005524 // ATP binding // inferred from electronic annotation///0016301 // kinase activity // inferred from electronic annotatio…	chr22:47080307-47082909 (-) // 87.59 // q13.31
212430_at	0.04606033	-1.5972481	-0.67558837	1.5972481	down	-1.5420858	-0.624883	1.5420858	down	-1.2779557	-0.35383773	1.2779557	down	-1.4899123	-0.5752274	1.4899123	down	RBM38	55544	0006397 // mRNA processing // inferred from electronic annotation///0006977 // DNA damage response, signal transduction by p53 class mediator resulting in cell cycle arrest // inferred from direct assay///0006978 // DNA damage response, signal transduction by p53 class mediator resulting in transcription of p21 class mediator // inferred from direct assay///0007049 // cell cycle // inferred from …	0005634 // nucleus // inferred from direct assay///0005634 // nucleus // inferred from electronic annotation///0005654 // nucleoplasm // inferred from direct assay///0005737 // cytoplasm // inferred from electronic annotation///0005829 // cytosol // inferred from direct assay///0005829 // cytosol // inferred from electronic annotation	0000166 // nucleotide binding // inferred from electronic annotation///0003676 // nucleic acid binding // inferred from electronic annotation///0003723 // RNA binding // inferred from electronic annotation///0003729 // mRNA binding // inferred from direct assay///0003730 // mRNA 3'-UTR binding // inferred from direct assay///0044822 // poly(A) RNA binding // inferred from direct assay	chr20:55966498-55984389 (+) // 91.2 // q13.31
204591_at	0.0017531511	-1.614797	-0.69135284	1.614797	down	-1.9273635	-0.9466287	1.9273635	down	-1.0574923	-0.08064717	1.0574923	down	-1.9484783	-0.96234787	1.9484783	down	CHL1	10752	0001764 // neuron migration // inferred from electronic annotation///0007155 // cell adhesion // inferred from electronic annotation///0007165 // signal transduction // traceable author statement///0007275 // multicellular organismal development // inferred from electronic annotation///0007399 // nervous system development // inferred from electronic annotation///0007411 // axon guidance // trace…	0005576 // extracellular region // inferred from electronic annotation///0005578 // proteinaceous extracellular matrix // inferred from electronic annotation///0005886 // plasma membrane // inferred from electronic annotation///0016020 // membrane // inferred from electronic annotation///0016021 // integral component of membrane // inferred from electronic annotation///0030425 // dendrite // infe…	0002020 // protease binding // inferred from electronic annotation///0005515 // protein binding // inferred from electronic annotation	chr3:238649-451090 (+) // 96.23 // p26.3
202793_at	0.0027381966	-1.619957	-0.69595546	1.619957	down	-1.2416207	-0.31222445	1.2416207	down	-1.2529955	-0.32538128	1.2529955	down	-1.6415763	-0.7150818	1.6415763	down	LPCAT3	10162	0006629 // lipid metabolic process // inferred from electronic annotation///0006644 // phospholipid metabolic process // traceable author statement///0008152 // metabolic process // inferred from electronic annotation///0008654 // phospholipid biosynthetic process // inferred from electronic annotation///0036150 // phosphatidylserine acyl-chain remodeling // traceable author statement///0036151 /…	0005783 // endoplasmic reticulum // inferred from electronic annotation///0005789 // endoplasmic reticulum membrane // traceable author statement///0016020 // membrane // inferred from direct assay///0016021 // integral component of membrane // inferred from electronic annotation	0016740 // transferase activity // inferred from electronic annotation///0016746 // transferase activity, transferring acyl groups // inferred from electronic annotation///0016747 // transferase activity, transferring acyl groups other than amino-acyl groups // inferred from electronic annotation///0047184 // 1-acylglycerophosphocholine O-acyltransferase activity // inferred from mutant phenotype	chr12:7085485-7092663 (-) // 84.43 // p13.31
210904_s_at	0.0093899695	-1.6675733	-0.7377502	1.6675733	down	-1.09847	-0.1354955	1.09847	down	-1.2605889	-0.33409783	1.2605889	down	-1.824202	-0.8672654	1.824202	down	IL13RA1	3597	0002639 // positive regulation of immunoglobulin production // inferred from electronic annotation///0007166 // cell surface receptor signaling pathway // traceable author statement///0019221 // cytokine-mediated signaling pathway // inferred from electronic annotation///0030890 // positive regulation of B cell proliferation // inferred from electronic annotation///0035772 // interleukin-13-media…	0005886 // plasma membrane // traceable author statement///0005898 // interleukin-13 receptor complex // traceable author statement///0016020 // membrane // inferred from electronic annotation///0016021 // integral component of membrane // inferred from electronic annotation	0004896 // cytokine receptor activity // inferred from electronic annotation///0005515 // protein binding // inferred from physical interaction///0016515 // interleukin-13 receptor activity // inferred from electronic annotation	chrX:117861564-117895482 (+) // 97.18 // q24
219909_at	3.4044704E-5	-1.807042	-0.85363	1.807042	down	-2.0752804	-1.0533063	2.0752804	down	-1.6661693	-0.73653495	1.6661693	down	-1.9043063	-0.9292655	1.9043063	down	MMP28	79148	0006508 // proteolysis // inferred from electronic annotation///0010760 // negative regulation of macrophage chemotaxis // inferred from electronic annotation	0005576 // extracellular region // inferred from electronic annotation///0005578 // proteinaceous extracellular matrix // non-traceable author statement///0005737 // cytoplasm // inferred from electronic annotation///0031012 // extracellular matrix // inferred from electronic annotation	0004222 // metalloendopeptidase activity // traceable author statement///0005509 // calcium ion binding // inferred from electronic annotation///0008233 // peptidase activity // inferred from electronic annotation///0008237 // metallopeptidase activity // inferred from electronic annotation///0008270 // zinc ion binding // inferred from electronic annotation///0016787 // hydrolase activity // inf…	chr17:34092892-34122637 (-) // 98.39 // q12
208102_s_at	0.048464887	-1.8530087	-0.8898697	1.8530087	down	-1.8950615	-0.92224467	1.8950615	down	-1.4963803	-0.5814769	1.4963803	down	-1.8243039	-0.86734605	1.8243039	down	PSD	5662	0007165 // signal transduction // non-traceable author statement///0016192 // vesicle-mediated transport // not recorded///0030182 // neuron differentiation // not recorded///0032012 // regulation of ARF protein signal transduction // inferred from electronic annotation///0043547 // positive regulation of GTPase activity // not recorded///0043547 // positive regulation of GTPase activity // infer…	0001726 // ruffle // inferred from electronic annotation///0005802 // trans-Golgi network // not recorded///0005886 // plasma membrane // inferred from electronic annotation///0016020 // membrane // inferred from electronic annotation///0016021 // integral component of membrane // inferred from electronic annotation///0030054 // cell junction // not recorded///0042995 // cell projection // inferr…	0004871 // signal transducer activity // non-traceable author statement///0005085 // guanyl-nucleotide exchange factor activity // inferred from electronic annotation///0005086 // ARF guanyl-nucleotide exchange factor activity // not recorded///0005515 // protein binding // inferred from physical interaction///0005543 // phospholipid binding // inferred from electronic annotation	chr10:104162374-104176632 (-) // 80.38 // q24.32
213247_at	0.036758903	-1.9973074	-0.9980564	1.9973074	down	-1.5534793	-0.63550305	1.5534793	down	1.2671543	0.3415923	1.2671543	up	-1.4496553	-0.5357099	1.4496553	down	SVEP1	79987	0007155 // cell adhesion // inferred from electronic annotation	0005576 // extracellular region // inferred from electronic annotation///0005737 // cytoplasm // inferred from electronic annotation///0016020 // membrane // inferred from electronic annotation	0003682 // chromatin binding // inferred from electronic annotation///0005509 // calcium ion binding // inferred from electronic annotation///0005515 // protein binding // inferred from electronic annotation///0030246 // carbohydrate binding // inferred from electronic annotation	chr9:113128455-113169347 (-) // 98.52 // q31.3
219213_at	0.039714124	-2.0086915	-1.0062561	2.0086915	down	-1.9468341	-0.9611299	1.9468341	down	1.1282984	0.17414862	1.1282984	up	-1.6110102	-0.6879656	1.6110102	down	JAM2	58494	0007162 // negative regulation of cell adhesion // inferred from electronic annotation///0007596 // blood coagulation // traceable author statement///0016337 // single organismal cell-cell adhesion // non-traceable author statement///0030198 // extracellular matrix organization // traceable author statement///0050900 // leukocyte migration // traceable author statement	0005886 // plasma membrane // traceable author statement///0005887 // integral component of plasma membrane // non-traceable author statement///0005923 // bicellular tight junction // inferred from electronic annotation///0016020 // membrane // inferred from electronic annotation///0016021 // integral component of membrane // inferred from electronic annotation///0030054 // cell junction // infer…	0005515 // protein binding // inferred from physical interaction///0046982 // protein heterodimerization activity // inferred from electronic annotation	chr21:27011931-27087092 (+) // 95.71 // q21.3
220037_s_at	0.00937853	-2.5767503	-1.3655527	2.5767503	down	-2.5207162	-1.3338337	2.5207162	down	-1.21745	-0.28386253	1.21745	down	-2.4761653	-1.3081076	2.4761653	down	LYVE1	10894	0005975 // carbohydrate metabolic process // traceable author statement///0006027 // glycosaminoglycan catabolic process // inferred from electronic annotation///0006810 // transport // inferred from electronic annotation///0006928 // movement of cell or subcellular component // traceable author statement///0007155 // cell adhesion // inferred from electronic annotation///0007160 // cell-matrix a…	0005886 // plasma membrane // traceable author statement///0005887 // integral component of plasma membrane // traceable author statement///0016020 // membrane // traceable author statement///0016021 // integral component of membrane // inferred from electronic annotation///0070062 // extracellular exosome // inferred from direct assay///0071944 // cell periphery // inferred from electronic annot…	0004872 // receptor activity // traceable author statement///0004888 // transmembrane signaling receptor activity // inferred from electronic annotation///0005515 // protein binding // inferred from physical interaction///0005540 // hyaluronic acid binding // inferred from electronic annotation	chr11:10580477-10590199 (-) // 98.68 // p15.4
219059_s_at	0.005476397	-2.5827396	-1.3689022	2.5827396	down	-2.4591458	-1.2981572	2.4591458	down	-1.19163	-0.25293636	1.19163	down	-2.132701	-1.0926816	2.132701	down	LYVE1	10894	0005975 // carbohydrate metabolic process // traceable author statement///0006027 // glycosaminoglycan catabolic process // inferred from electronic annotation///0006810 // transport // inferred from electronic annotation///0006928 // movement of cell or subcellular component // traceable author statement///0007155 // cell adhesion // inferred from electronic annotation///0007160 // cell-matrix a…	0005886 // plasma membrane // traceable author statement///0005887 // integral component of plasma membrane // traceable author statement///0016020 // membrane // traceable author statement///0016021 // integral component of membrane // inferred from electronic annotation///0070062 // extracellular exosome // inferred from direct assay///0071944 // cell periphery // inferred from electronic annot…	0004872 // receptor activity // traceable author statement///0004888 // transmembrane signaling receptor activity // inferred from electronic annotation///0005515 // protein binding // inferred from physical interaction///0005540 // hyaluronic acid binding // inferred from electronic annotation	chr11:10579351-10590164 (-) // 96.83 // p15.4
214598_at	0.001742488	-2.8841887	-1.5281656	2.8841887	down	-6.5419464	-2.70972	6.5419464	down	-2.833781	-1.5027282	2.833781	down	-6.415762	-2.6816206	6.415762	down	CLDN8	9073	0016338 // calcium-independent cell-cell adhesion via plasma membrane cell-adhesion molecules // inferred from sequence or structural similarity	0005783 // endoplasmic reticulum // inferred from direct assay///0005886 // plasma membrane // inferred from direct assay///0005923 // bicellular tight junction // inferred from sequence or structural similarity///0016020 // membrane // inferred from electronic annotation///0016021 // integral component of membrane // inferred from electronic annotation///0016323 // basolateral plasma membrane //…	0005198 // structural molecule activity // inferred from electronic annotation///0005515 // protein binding // inferred from physical interaction///0042802 // identical protein binding // inferred from sequence or structural similarity	chr21:31586328-31588391 (-) // 99.23 // q22.11
209687_at	3.9754057E-5	-5.318223	-2.4109442	5.318223	down	-6.7000136	-2.744164	6.7000136	down	-1.4715421	-0.5573288	1.4715421	down	-4.941199	-2.304861	4.941199	down	CXCL12	6387	0001569 // patterning of blood vessels // inferred from electronic annotation///0001666 // response to hypoxia // inferred from electronic annotation///0001667 // ameboidal-type cell migration // inferred from electronic annotation///0001764 // neuron migration // inferred from electronic annotation///0001938 // positive regulation of endothelial cell proliferation // inferred from electronic ann…	0005576 // extracellular region // traceable author statement///0005615 // extracellular space // inferred from electronic annotation///0005886 // plasma membrane // inferred from electronic annotation///0009897 // external side of plasma membrane // not recorded///0070062 // extracellular exosome // inferred from direct assay	0005102 // receptor binding // traceable author statement///0005125 // cytokine activity // inferred from electronic annotation///0008009 // chemokine activity // inferred from direct assay///0008009 // chemokine activity // traceable author statement///0008083 // growth factor activity // inferred from electronic annotation///0042056 // chemoattractant activity // not recorded///0042379 // chemo…	chr10:44872580-44880557 (-) // 81.46 // q11.21
